# Supplementary material
Source: publisher figshare collection journal article supplement (https://gsajournals.figshare.com/articles/dataset/_/24034332)
Supplement: Supplementary file 1 [file 1]

## Sheet: Notes
For Table S4:
In parent specific transcripts detected for each library, Neither indicates there were SNPs, but that there was not enough information to infer a transcript using our criteria. NA indicates we did not have any SNPs in that gene.
While we looked for orthologous genes to the set of genes in Bono et al. 2011, we did not find any that met our filtering criteria, threrefore there is no colum for this data set in Table S3.
For Table S5:
There is no column for Ahmed-Braimah et al. 2021 in this table as there were no male-derived transcripts present in that list.

## Sheet: Table S1
Table S1: Read-pairs per Library
Female Genotype	Organ	Read-pairs	Mean Coverage per Base Pair
RAL 304	Parovaria	20513346	19.6
RAL 304	Seminal Receptacle	19797634	21.9
RAL 304	Spermatheca	18778304	17.1
RAL 307	Parovaria	16183938	21.3
RAL 307	Seminal Receptacle	14127659	23
RAL 307	Spermatheca	21357080	24.3
RAL 360	Seminal Receptacle	15488884	20.2
RAL 360	Spermatheca	18061012	17.6
RAL 399	Spermatheca	17549951	18.9

## Sheet: Table S2
Table S2: Coverage per Distinguishing SNP by Sex
Cross	Organ	Female Coverage Mean per SNP	Male Coverage Mean per SNP	# Distinguishing SNPs
RAL 304 x RAL 517	Spermatheca	11.13	3.304	101359
RAL 307 x RAL 517	Spermatheca	16.29	5.853	108730
RAL 360 x RAL 517	Spermatheca	16.52	0.2792	80524
RAL 399 x RAL 517	Spermatheca	24.08	0.3236	72061
RAL 304 x RAL 517	Seminal Receptacle	19.82	5.086	101359
RAL 307 x RAL 517	Seminal Receptacle	16.61	5.559	108730
RAL 360 x RAL 517	Seminal Receptacle	22.25	0.4152	80524
RAL 304 x RAL 517	Parovaria	16.27	4.639	101359
RAL 307 x RAL 517	Parovaria	13.95	5.232	108730

## Sheet: Table S3
Table S3: Expressed Genes per Library
RAL Line	Tissue	All Expressed Genes per Library; TPM ≥ 1	Theoretically Detectable Transcripts per Library
RAL 304 x RAL 517	Parovara	7264	3701
RAL 304 x RAL 517	Seminal Receptacle	7679	3701
RAL 304 x RAL 517	Spermatheca	6652	3701
RAL 307 x RAL 517	Parovara	7979	3378
RAL 307 x RAL 517	Seminal Receptacle	8441	3378
RAL 307 x RAL 517	Spermatheca	8008	3378
RAL 360 x RAL 517	Seminal Receptacle	7378	3290
RAL 360 x RAL 517	Spermatheca	6708	3290
RAL 399 x RAL 517	Spermatheca	7182	3679

## Sheet: Table S4
Table S4: All Detected Transcripts
				Number of Libraries with Transcripts				Presence of Gene in Other Gene Lists							Parent Specific Transcripts Detected
GeneID	Name	Male Transcripts in One or More Libraries	Number of Libraries with Male Transcripts	Male	Female	Both	Total	Wigby et al. 2020	Immarigeon et al. 2021	McCullough et al. 2020	Ahmed-Braimah et al. 2021	Majane et al. 2022	Expressed Female-Derived Transcripts in Immarigeon et al. 2021 or Majane et al. 2022	Number of Transcriptomes Ost et al. 2014	RAL 304 Parovaria	RAL 304 Seminal Receptacle	RAL 304 Spermatheca	RAL 307 Parovaria	RAL 307 Seminal Receptacle	RAL 307 Spermatheca	RAL 360 Seminal Receptacle	RAL 360 Spermatheca	RAL 399 Spermatheca
FBgn0039066	EloA	NO	0	0	3	0	3	NO	NO	NO	NO	NA	NO	4	Female	Female	Neither	Neither	Neither	Neither	Neither	Neither	Female
FBgn0011207	pelo	YES	3	0	0	3	3	NO	NO	NO	NO	NA	NO	4	Neither	Neither	Neither	Both	Both	Both	Neither	Neither	Neither
FBgn0004852	Ac76E	NO	0	0	3	0	3	NO	NO	NO	NO	NA	NO	4	Neither	Neither	Neither	Female	Female	Female	Neither	Neither	Neither
FBgn0000565	MsrA	YES	3	0	2	3	5	NO	NO	NO	NO	NA	NO	4	Neither	Neither	Neither	Both	Both	Both	Female	Female	Neither
FBgn0027865	Tsp96F	NO	0	0	1	0	1	NO	NO	NO	NO	NA	NO	4	Neither	Neither	Neither	NA	NA	NA	Female	Neither	Neither
FBgn0086253	rumi	YES	3	0	1	3	4	NO	NO	NO	NO	NA	NO	4	Both	Both	Both	Neither	Neither	Neither	Neither	Neither	Female
FBgn0026439	Eaat1	NO	0	0	6	0	6	NO	NO	NO	NO	NA	NO	4	Female	Female	Neither	Female	Female	Female	Neither	Neither	Female
FBgn0011742	Arp2	NO	0	0	1	0	1	NO	NO	NO	NO	NA	NO	4	Neither	Neither	Neither	NA	NA	NA	Neither	Neither	Female
FBgn0020279	lig	NO	0	0	1	0	1	NO	NO	NO	NO	NA	NO	4	Neither	Neither	Neither	Neither	Neither	Neither	Neither	Neither	Female
FBgn0027091	CysRS	YES	6	0	3	6	9	NO	NO	NO	NO	NA	NO	4	Both	Both	Both	Both	Both	Both	Female	Female	Female
FBgn0287631	CG46491	NO	0	0	7	0	7	NO	NO	NO	NO	NA	NO	4	Female	Female	Female	Female	Female	Female	Neither	Neither	Female
FBgn0036239	Pop2	YES	3	3	0	0	3	NO	NO	NO	NO	NA	NO	4	Neither	Neither	Neither	Male	Male	Male	Neither	Neither	Neither
FBgn0015035	Cyp4e3	YES	2	0	1	2	3	NO	NO	NO	NO	NA	NO	0	NA	NA	NA	Both	Female	Both	Neither	Neither	Neither
FBgn0039800	Npc2g	YES	3	0	0	3	3	NO	NO	NO	NO	NA	NO	4	Both	Both	Both	Neither	Neither	Neither	Neither	Neither	Neither
FBgn0262515	VhaAC45	NO	0	0	1	0	1	NO	YES	NO	NO	NA	NO	4	Neither	Neither	Neither	NA	NA	NA	NA	NA	Female
FBgn0016754	sba	NO	0	0	3	0	3	NO	NO	NO	NO	SC	YES	3	Neither	Neither	NA	Female	Female	Female	Neither	Neither	NA
FBgn0039485	CG17189	NO	0	0	1	0	1	NO	NO	NO	NO	NA	NO	0	Neither	Neither	Neither	Female	Neither	Neither	NA	NA	Neither
FBgn0034641	mahj	YES	5	0	1	5	6	NO	NO	NO	NO	NA	NO	4	Female	Both	Both	Both	Both	Both	Neither	Neither	Neither
FBgn0036449	bmm	YES	3	0	1	3	4	NO	NO	NO	NO	NA	NO	4	Neither	Neither	Neither	Both	Both	Both	Neither	Neither	Female
FBgn0028429	I-2	YES	3	3	0	0	3	NO	NO	NO	NO	NA	NO	4	Neither	Neither	Neither	Male	Male	Male	Neither	Neither	Neither
FBgn0038771	CG4390	NO	0	0	3	0	3	NO	NO	NO	NO	NA	NO	4	Neither	Neither	Neither	Female	Female	Female	Neither	Neither	Neither
FBgn0010909	msn	YES	1	0	6	1	7	NO	NO	YES	NO	NA	NO	4	Female	Both	Female	Female	Female	Female	Neither	Neither	Female
FBgn0003567	su(Hw)	NO	0	0	6	0	6	NO	NO	NO	NO	NA	NO	4	Female	Female	Female	Neither	Neither	Neither	Female	Female	Female
FBgn0039301	Nup37	NO	0	0	5	0	5	NO	NO	NO	NO	NA	NO	1	Female	Female	Female	NA	NA	NA	Female	Female	NA
FBgn0037931	CG18476	NO	0	0	1	0	1	NO	NO	NO	NO	NA	NO	3	Neither	Female	Neither	Neither	Neither	Neither	Neither	Neither	Neither
FBgn0050431	CG30431	YES	2	2	0	0	2	NO	NO	NO	NO	NA	NO	4	Male	Male	Neither	NA	NA	NA	NA	NA	Neither
FBgn0038488	m-cup	YES	3	3	1	0	4	NO	NO	NO	NO	NA	NO	4	Male	Male	Male	Neither	Female	Neither	Neither	Neither	Neither
FBgn0259735	mtgo	NO	0	0	3	0	3	NO	NO	NO	NO	MC	NO	4	Neither	Neither	Neither	Neither	Neither	Neither	Female	Female	Female
FBgn0033859	fand	NO	0	0	6	0	6	NO	NO	NO	NO	NA	NO	4	Female	Female	Female	Neither	Neither	Neither	Female	Female	Female
FBgn0036560	CG5895	NO	0	0	1	0	1	NO	NO	NO	NO	NA	NO	0	NA	Neither	NA	Female	Neither	Neither	NA	NA	NA
FBgn0032846	Pyroxd1	NO	0	0	1	0	1	NO	NO	NO	NO	NA	NO	4	NA	NA	NA	NA	NA	NA	NA	NA	Female
FBgn0003008	or	NO	0	0	2	0	2	NO	NO	NO	NO	NA	NO	4	Female	Neither	Female	NA	NA	NA	Neither	Neither	NA
FBgn0033886	Rpn13	NO	0	0	2	0	2	NO	NO	NO	NO	NA	NO	4	Neither	Neither	Neither	Neither	Neither	Neither	Female	Female	Neither
FBgn0035763	mrva	YES	6	0	3	6	9	NO	YES	NO	NO	NA	YES	4	Both	Both	Both	Both	Both	Both	Female	Female	Female
FBgn0265297	pAbp	NO	0	0	1	0	1	NO	NO	YES	NO	NA	NO	4	Neither	Neither	Neither	Neither	Neither	Neither	NA	NA	Female
FBgn0002622	RpS3	NO	0	0	3	0	3	NO	NO	YES	NO	NA	NO	4	Neither	Neither	Neither	Female	Female	Female	Neither	Neither	Neither
FBgn0010435	emp	NO	0	0	3	0	3	NO	NO	YES	NO	NA	NO	4	Neither	Female	Neither	Neither	Neither	Neither	Female	Female	Neither
FBgn0031887	Ugt307A1	YES	1	0	4	1	5	NO	NO	NO	NO	NA	NO	0	Female	Both	Neither	Female	Female	Neither	Female	Neither	Neither
FBgn0031474	CG2991	NO	0	0	8	0	8	NO	NO	NO	NO	NA	NO	4	Female	Female	Female	Female	Female	Female	Female	Female	Neither
FBgn0085423	GramD1B	YES	3	0	2	3	5	NO	NO	NO	NO	SC	YES	4	Both	Both	Both	Neither	Neither	Neither	Female	Female	Neither
FBgn0032702	CG10376	NO	0	0	9	0	9	NO	NO	NO	NO	NA	NO	4	Female	Female	Female	Female	Female	Female	Female	Female	Female
FBgn0051288	CG31288	NO	0	0	5	0	5	NO	NO	NO	NO	NA	NO	4	Female	Female	Female	NA	NA	NA	Female	Female	Neither
FBgn0038387	blp	NO	0	0	1	0	1	NO	NO	NO	NO	NA	NO	4	Neither	Female	Neither	Neither	Neither	Neither	Neither	Neither	Neither
FBgn0039118	CG10208	NO	0	0	9	0	9	NO	NO	NO	NO	NA	NO	2	Female	Female	Female	Female	Female	Female	Female	Female	Female
FBgn0031597	CG17612	NO	0	0	3	0	3	NO	NO	NO	NO	NA	NO	2	Neither	Neither	NA	Female	Female	Female	Neither	Neither	Neither
FBgn0032247	CG5188	NO	0	0	5	0	5	NO	NO	NO	NO	NA	NO	2	Female	Female	Female	Neither	Female	Female	Neither	Neither	Neither
FBgn0036461	Zip71B	NO	0	0	2	0	2	NO	NO	NO	NO	NA	NO	4	NA	NA	Neither	Neither	Neither	Female	NA	NA	Female
FBgn0037924	CG14712	YES	3	0	0	3	3	NO	NO	NO	NO	NA	NO	4	Both	Both	Both	Neither	Neither	Neither	NA	NA	NA
FBgn0035539	slow	NO	0	0	9	0	9	NO	NO	NO	NO	NA	NO	3	Female	Female	Female	Female	Female	Female	Female	Female	Female
FBgn0038760	MED25	NO	0	0	1	0	1	NO	NO	NO	NO	NA	NO	3	Neither	Neither	Neither	NA	NA	NA	NA	NA	Female
FBgn0035309	CG15879	YES	2	0	2	2	4	NO	NO	NO	NO	NA	NO	4	Neither	Neither	Neither	Female	Both	Both	Neither	Neither	Female
FBgn0035762	Rint1	NO	0	0	6	0	6	NO	NO	NO	NO	NA	NO	4	Female	Female	Female	Neither	Neither	Neither	Female	Female	Female
FBgn0262527	nsl1	YES	3	0	0	3	3	NO	NO	NO	NO	NA	NO	4	Both	Both	Both	Neither	Neither	Neither	Neither	Neither	Neither
FBgn0261268	Cul3	YES	3	3	0	0	3	NO	NO	NO	NO	NA	NO	4	Male	Male	Male	NA	NA	NA	Neither	Neither	Neither
FBgn0036316	nebu	YES	3	3	0	0	3	NO	NO	YES	NO	NA	NO	4	Male	Male	Male	Neither	Neither	Neither	Neither	Neither	Neither
FBgn0039756	CG9743	YES	3	0	6	3	9	NO	NO	NO	NO	NA	NO	4	Both	Both	Both	Female	Female	Female	Female	Female	Female
FBgn0036614	Golgin104	YES	3	0	2	3	5	NO	NO	NO	NO	NA	NO	4	Neither	Neither	Neither	Both	Both	Both	Female	Female	Neither
FBgn0039430	CG5455	NO	0	0	6	0	6	NO	NO	NO	NO	NA	NO	4	Neither	Neither	Neither	Female	Female	Female	Female	Female	Female
FBgn0267330	KdelR	NO	0	0	6	0	6	NO	NO	NO	NO	NA	NO	4	Female	Female	Female	Female	Female	Female	Neither	Neither	Neither
FBgn0051028	CG31028	NO	0	0	1	0	1	NO	NO	NO	NO	NA	NO	0	NA	NA	NA	NA	NA	Neither	Female	NA	NA
FBgn0035318	CG9018	YES	3	0	0	3	3	NO	NO	NO	NO	NA	NO	1	Neither	Neither	Neither	Both	Both	Both	NA	NA	NA
FBgn0026261	bonsai	NO	0	0	9	0	9	NO	NO	NO	NO	NA	NO	3	Female	Female	Female	Female	Female	Female	Female	Female	Female
FBgn0053158	CG33158	NO	0	0	9	0	9	NO	NO	NO	NO	NA	NO	4	Female	Female	Female	Female	Female	Female	Female	Female	Female
FBgn0001987	Gli	NO	0	0	3	0	3	NO	NO	NO	NO	NA	NO	4	Neither	Neither	Neither	Neither	Neither	Neither	Female	Female	Female
FBgn0031314	IntS14	YES	3	0	3	3	6	NO	NO	NO	NO	NA	NO	3	Female	Female	Female	Both	Both	Both	NA	NA	Neither
FBgn0000256	capu	NO	0	0	1	0	1	NO	NO	NO	NO	NA	NO	4	Neither	Female	NA	Neither	Neither	Neither	Neither	Neither	Neither
FBgn0036571	Strump	NO	0	0	3	0	3	NO	NO	NO	NO	NA	NO	4	Neither	Neither	Neither	Female	Female	Female	Neither	Neither	Neither
FBgn0024320	Npc1a	NO	0	0	7	0	7	NO	NO	NO	NO	NA	NO	4	Female	Female	Female	Female	Female	Female	Neither	Neither	Female
FBgn0001316	klar	YES	3	0	3	3	6	NO	NO	NO	NO	SC	YES	4	Both	Both	Both	Neither	Neither	Neither	Female	Female	Female
FBgn0036774	mRpS26	NO	0	0	3	0	3	NO	NO	NO	NO	NA	NO	3	Female	Female	Female	Neither	Neither	Neither	Neither	Neither	Neither
FBgn0027503	CG11970	YES	2	2	0	0	2	NO	NO	YES	NO	NA	NO	4	Male	Male	Neither	Neither	Neither	Neither	NA	NA	NA
FBgn0036811	MED11	NO	0	0	5	0	5	NO	NO	NO	NO	NA	NO	4	Neither	Neither	Neither	Female	Female	Female	Female	Female	Neither
FBgn0260779	GatA	NO	0	0	3	0	3	NO	NO	NO	NO	NA	NO	4	Female	Female	Female	Neither	Neither	Neither	Neither	Neither	Neither
FBgn0010313	corto	NO	0	0	4	0	4	NO	NO	NO	NO	NA	NO	4	Neither	Female	Female	Neither	Neither	Neither	Female	Neither	Female
FBgn0031610	Paris	NO	0	0	6	0	6	NO	NO	NO	NO	NA	NO	3	Female	Female	Female	NA	NA	NA	Female	Female	Female
FBgn0015575	alpha-Est7	NO	0	0	2	0	2	NO	NO	NO	NO	NA	NO	4	Neither	Neither	Neither	NA	NA	NA	Female	Female	NA
FBgn0000250	cact	NO	0	0	8	0	8	NO	NO	NO	NO	NA	NO	4	Female	Female	Female	Female	Female	Female	Female	Female	Neither
FBgn0062413	Ctr1A	NO	0	0	1	0	1	NO	NO	NO	NO	NA	NO	4	NA	NA	NA	NA	NA	NA	Female	Neither	Neither
FBgn0031782	WDR79	YES	3	0	0	3	3	NO	NO	NO	NO	NA	NO	1	Both	Both	Both	Neither	Neither	Neither	Neither	Neither	Neither
FBgn0046296	DEF8	YES	2	2	0	0	2	NO	NO	NO	NO	NA	NO	4	Neither	Neither	Neither	Male	Neither	Male	NA	NA	NA
FBgn0265778	PDZ-GEF	NO	0	0	3	0	3	NO	NO	YES	NO	NA	NO	4	Neither	Neither	Neither	Female	Female	Female	Neither	Neither	Neither
FBgn0029903	pod1	NO	0	0	4	0	4	NO	NO	NO	NO	NA	NO	4	Female	Female	Female	NA	NA	NA	Neither	NA	Female
FBgn0039207	Cftr	NO	0	0	4	0	4	NO	NO	NO	NO	NA	NO	4	Female	Female	Female	NA	NA	NA	Neither	Neither	Female
FBgn0035266	Gk2	NO	0	0	8	0	8	NO	NO	NO	NO	NA	NO	4	Female	Female	Female	Female	Female	Female	Female	Female	Neither
FBgn0034013	unc-5	NO	0	0	1	0	1	NO	NO	NO	NO	NA	NO	2	Neither	Female	NA	NA	Neither	NA	Neither	NA	Neither
FBgn0000289	cg	YES	3	0	6	3	9	NO	NO	NO	NO	NA	NO	4	Both	Both	Both	Female	Female	Female	Female	Female	Female
FBgn0265605	Ric	NO	0	0	1	0	1	NO	NO	NO	NO	NA	NO	4	Neither	Neither	Neither	Neither	Neither	Neither	Neither	Neither	Female
FBgn0030081	CG7246	NO	0	0	2	0	2	NO	NO	NO	NO	NA	NO	2	NA	NA	NA	NA	NA	NA	Female	Female	Neither
FBgn0030063	CG1789	NO	0	0	2	0	2	NO	NO	NO	NO	NA	NO	2	NA	NA	NA	NA	NA	NA	Female	Female	NA
FBgn0010877	l(3)05822	YES	3	3	2	0	5	NO	NO	NO	NO	NA	NO	4	Female	Female	Neither	Male	Male	Male	Neither	Neither	Neither
FBgn0031461	daw	NO	0	0	3	0	3	NO	NO	NO	NO	NA	NO	4	Female	Female	Neither	Neither	Neither	Neither	Neither	Neither	Female
FBgn0026562	SPARC	YES	2	0	0	2	2	NO	NO	NO	NO	NA	NO	4	Neither	Neither	Neither	NA	NA	NA	Both	Both	Neither
FBgn0038471	Trm7-32	NO	0	0	1	0	1	NO	NO	NO	NO	NA	NO	4	Neither	Neither	Neither	Neither	Neither	Female	NA	NA	Neither
FBgn0031745	rau	YES	2	0	7	2	9	NO	NO	NO	NO	NA	NO	4	Female	Both	Both	Female	Female	Female	Female	Female	Female
FBgn0264979	CG4267	NO	0	0	4	0	4	NO	NO	NO	NO	NA	NO	1	Neither	Neither	Neither	Female	Female	Female	Neither	Neither	Female
FBgn0288310	mv	NO	0	0	6	0	6	NO	NO	NO	NO	NA	NO	4	Female	Female	Neither	Female	Female	Female	Neither	Female	Neither
FBgn0011232	scat	YES	3	0	4	3	7	NO	NO	NO	NO	NA	NO	4	Female	Female	Female	Both	Both	Both	Neither	Neither	Female
FBgn0033980	Cyp6a20	NO	0	0	3	0	3	NO	NO	NO	NO	NA	NO	4	Female	Female	Female	Neither	Neither	Neither	Neither	Neither	Neither
FBgn0031987	CG12375	NO	0	0	1	0	1	NO	NO	NO	NO	NA	NO	4	Neither	Neither	Neither	Neither	Neither	Neither	NA	NA	Female
FBgn0036770	Prestin	YES	1	1	2	0	3	NO	NO	NO	NO	NA	NO	4	Neither	Female	Neither	Male	Neither	Neither	Neither	Neither	Female
FBgn0034176	ste24a	YES	3	0	0	3	3	NO	NO	NO	NO	NA	NO	4	Neither	Neither	Neither	Both	Both	Both	Neither	Neither	Neither
FBgn0036286	CG10616	NO	0	0	3	0	3	NO	NO	YES	NO	NA	NO	4	Neither	Neither	Neither	Neither	Neither	Neither	Female	Female	Female
FBgn0034853	Ice1	YES	2	2	0	0	2	NO	NO	NO	NO	NA	NO	3	Male	Male	Neither	Neither	Neither	Neither	Neither	Neither	Neither
FBgn0034200	Gbp2	YES	2	0	2	2	4	NO	NO	NO	NO	NA	NO	4	Both	Both	Neither	Neither	Neither	Neither	Female	Female	Neither
FBgn0086443	AsnRS	YES	3	0	6	3	9	NO	NO	NO	NO	NA	NO	4	Female	Female	Female	Both	Both	Both	Female	Female	Female
FBgn0031571	bark	NO	0	0	3	0	3	NO	NO	NO	NO	NA	NO	4	Neither	Neither	Neither	Female	Female	Female	Neither	Neither	Neither
FBgn0039754	CG9747	YES	2	0	0	2	2	NO	NO	NO	NO	NA	NO	4	NA	Both	Both	Neither	Neither	Neither	Neither	Neither	Neither
FBgn0036314	Sf3a2	NO	0	0	9	0	9	NO	NO	NO	NO	NA	NO	3	Female	Female	Female	Female	Female	Female	Female	Female	Female
FBgn0086906	sls	YES	6	0	3	6	9	NO	NO	NO	NO	NA	NO	4	Both	Both	Both	Both	Both	Both	Female	Female	Female
FBgn0034933	CG3735	YES	1	0	3	1	4	NO	NO	NO	NO	NA	NO	4	Female	Both	Female	Neither	Neither	Neither	Neither	Neither	Female
FBgn0034975	enok	YES	2	0	6	2	8	NO	NO	NO	NO	NA	NO	4	Both	Female	Both	Female	Female	Female	Female	Female	Neither
FBgn0261020	wol	YES	3	0	0	3	3	NO	NO	NO	NO	NA	NO	4	Both	Both	Both	Neither	Neither	Neither	Neither	Neither	Neither
FBgn0263027	CG43322	NO	0	0	3	0	3	NO	NO	NO	NO	NA	NO	3	Neither	Neither	Neither	Female	Female	Neither	Female	Neither	Neither
FBgn0031774	CG9147	NO	0	0	2	0	2	NO	NO	NO	NO	NA	NO	4	NA	NA	NA	Neither	Neither	Neither	Female	Female	NA
FBgn0052654	Sec16	NO	0	0	1	0	1	NO	NO	NO	NO	NA	NO	4	NA	NA	NA	NA	NA	NA	Neither	Neither	Female
FBgn0013953	Esp	NO	0	0	3	0	3	NO	NO	NO	NO	NA	NO	4	Female	Female	Female	NA	NA	NA	Neither	Neither	Neither
FBgn0038108	CG7518	NO	0	0	1	0	1	NO	NO	YES	NO	NA	NO	4	Neither	Neither	Neither	Neither	Neither	Female	Neither	Neither	Neither
FBgn0000319	Chc	NO	0	0	1	0	1	NO	NO	YES	NO	NA	NO	4	NA	NA	NA	NA	NA	NA	NA	NA	Female
FBgn0033972	Ciao1	YES	3	0	0	3	3	NO	NO	NO	NO	NA	NO	4	Neither	Neither	Neither	Both	Both	Both	NA	NA	Neither
FBgn0262975	cnc	NO	0	0	7	0	7	NO	NO	NO	NO	NA	NO	4	Female	Female	Female	Female	Female	Female	Neither	Neither	Female
FBgn0283659	THG	NO	0	0	1	0	1	NO	NO	NO	NO	NA	NO	2	Female	Neither	Neither	Neither	Neither	Neither	NA	NA	NA
FBgn0025574	Pli	NO	0	0	6	0	6	NO	NO	NO	NO	NA	NO	4	Female	Female	Female	Female	Female	Female	Neither	Neither	Neither
FBgn0036157	CG7560	YES	4	3	5	1	9	NO	NO	NO	NO	NA	NO	3	Both	Female	Female	Male	Male	Male	Female	Female	Female
FBgn0030242	sofe	YES	1	1	0	0	1	NO	NO	NO	NO	NA	NO	2	NA	NA	NA	NA	Male	NA	NA	NA	NA
FBgn0034182	SmydA-7	YES	2	1	2	1	4	NO	NO	NO	NO	NA	NO	4	Female	Female	Neither	Neither	Both	Male	Neither	Neither	Neither
FBgn0030432	CG4404	NO	0	0	2	0	2	NO	NO	NO	NO	NA	NO	4	NA	NA	NA	NA	NA	NA	Female	Female	Neither
FBgn0261286	Mat89Ba	YES	2	0	2	2	4	NO	NO	NO	NO	NA	NO	4	Both	Both	Neither	NA	NA	NA	Female	Female	NA
FBgn0011695	EbpIII	NO	0	0	1	0	1	YES	NO	YES	NO	NA	NO	4	Neither	Female	Neither	Neither	Neither	Neither	Neither	Neither	Neither
FBgn0034437	CG10051	NO	0	0	2	0	2	NO	NO	NO	NO	NA	NO	0	NA	NA	NA	NA	Female	Female	Neither	NA	Neither
FBgn0035896	CG6983	NO	0	0	2	0	2	NO	NO	NO	NO	NA	NO	4	Female	Female	Neither	Neither	Neither	Neither	Neither	Neither	Neither
FBgn0034879	Rrp4	YES	3	3	0	0	3	NO	NO	NO	NO	NA	NO	3	NA	NA	NA	Male	Male	Male	Neither	Neither	Neither
FBgn0033884	CG13344	NO	0	0	8	0	8	NO	NO	NO	NO	NA	NO	2	Female	Female	Female	Female	Female	Female	Female	Female	Neither
FBgn0035586	Fitm	NO	0	0	5	0	5	NO	NO	NO	NO	NA	NO	4	Neither	Neither	Neither	Female	Female	Female	Female	Female	Neither
FBgn0041710	yellow-f	YES	2	0	0	2	2	NO	NO	NO	NO	NA	NO	1	Both	Both	Neither	Neither	Neither	NA	Neither	NA	Neither
FBgn0260407	mRpS23	YES	3	0	1	3	4	NO	NO	NO	NO	NA	NO	4	NA	NA	NA	Both	Both	Both	NA	NA	Female
FBgn0031392	AIF	YES	1	1	2	0	3	NO	NO	YES	NO	NA	NO	4	Female	Female	Male	Neither	Neither	Neither	Neither	Neither	Neither
FBgn0267350	Pi4KIIIalpha	NO	0	0	3	0	3	NO	NO	YES	NO	NA	NO	4	NA	NA	NA	NA	NA	NA	Female	Female	Female
FBgn0020443	eRF3	NO	0	0	5	0	5	NO	NO	NO	NO	NA	NO	4	Neither	Neither	Neither	Female	Female	Female	Female	Female	Neither
FBgn0039730	CG7903	NO	0	0	1	0	1	NO	NO	NO	NO	NA	NO	4	Neither	Neither	Neither	NA	NA	NA	Neither	Neither	Female
FBgn0033935	Sin1	NO	0	0	1	0	1	NO	NO	NO	NO	NA	NO	4	Neither	Neither	Neither	Neither	Neither	Neither	NA	NA	Female
FBgn0264953	Piezo	NO	0	0	2	0	2	NO	NO	NO	NO	NA	NO	4	Female	Neither	Female	Neither	Neither	Neither	Neither	Neither	Neither
FBgn0262519	Mi-2	YES	3	0	0	3	3	NO	NO	NO	NO	NA	NO	4	Neither	Neither	Neither	Both	Both	Both	Neither	Neither	NA
FBgn0039601	CG1523	NO	0	0	2	0	2	NO	NO	NO	NO	NA	NO	4	NA	NA	NA	Neither	Neither	Neither	Female	Female	NA
FBgn0032402	PLCXD	NO	0	0	3	0	3	NO	NO	NO	NO	NA	NO	1	Neither	Neither	Neither	Female	Female	Female	Neither	Neither	Neither
FBgn0038893	Archease	NO	0	0	3	0	3	NO	NO	NO	NO	NA	NO	4	Neither	Neither	Neither	NA	NA	NA	Female	Female	Female
FBgn0030243	CG2186	NO	0	0	1	0	1	NO	NO	NO	NO	NA	NO	4	NA	NA	NA	Neither	Neither	Neither	NA	NA	Female
FBgn0010905	Spn	NO	0	0	3	0	3	NO	NO	NO	NO	NA	NO	4	NA	Neither	Neither	Neither	Female	Female	Female	Neither	Neither
FBgn0262508	CG43078	YES	2	0	4	2	6	NO	NO	NO	NO	NA	NO	4	Female	Female	Female	Both	Both	Female	Neither	Neither	Neither
FBgn0002183	dre4	NO	0	0	8	0	8	NO	NO	NO	NO	NA	NO	4	Female	Female	Female	Female	Female	Female	Female	Female	Neither
FBgn0031449	CG31689	NO	0	0	5	0	5	NO	NO	NO	NO	NA	NO	4	Neither	Neither	Neither	Female	Female	Female	Female	Female	Neither
FBgn0036761	MED19	NO	0	0	1	0	1	NO	NO	NO	NO	NA	NO	4	Neither	Neither	Neither	NA	NA	NA	Female	Neither	Neither
FBgn0031566	CG2818	YES	3	0	6	3	9	NO	NO	NO	NO	NA	NO	4	Both	Both	Both	Female	Female	Female	Female	Female	Female
FBgn0038810	Srp72	YES	3	0	2	3	5	NO	NO	YES	NO	NA	NO	4	Both	Both	Both	NA	NA	NA	Female	Female	Neither
FBgn0034067	CG8399	YES	3	0	1	3	4	NO	YES	NO	NO	NA	YES	4	Both	Both	Both	Neither	Neither	Neither	NA	NA	Female
FBgn0023001	melt	YES	3	3	2	0	5	NO	NO	NO	NO	NA	NO	4	Neither	Neither	Neither	Male	Male	Male	Female	Female	Neither
FBgn0016756	Usp47	NO	0	0	9	0	9	NO	NO	NO	NO	NA	NO	4	Female	Female	Female	Female	Female	Female	Female	Female	Female
FBgn0028539	Eato	NO	0	0	3	0	3	NO	NO	NO	NO	NA	NO	4	Neither	Neither	Neither	Female	Neither	Female	Neither	Neither	Female
FBgn0031048	CG12237	NO	0	0	1	0	1	NO	NO	NO	NO	NA	NO	4	NA	NA	NA	NA	NA	NA	NA	NA	Female
FBgn0010612	ATPsynG	NO	0	0	1	0	1	NO	NO	YES	NO	NA	NO	4	Neither	Neither	Neither	NA	NA	NA	Female	Neither	Neither
FBgn0261564	ReepA	YES	3	3	4	0	7	NO	NO	NO	NO	NA	NO	4	Female	Female	Female	Male	Male	Male	NA	NA	Female
FBgn0053138	AGBE	NO	0	0	9	0	9	NO	NO	NO	NO	NA	NO	4	Female	Female	Female	Female	Female	Female	Female	Female	Female
FBgn0004875	enc	NO	0	0	1	0	1	NO	NO	NO	NO	NA	NO	4	Neither	Neither	Neither	Neither	Neither	Neither	Neither	Neither	Female
FBgn0051040	Cog7	YES	3	3	6	0	9	NO	NO	NO	NO	NA	NO	4	Female	Female	Female	Male	Male	Male	Female	Female	Female
FBgn0051729	CG31729	NO	0	0	7	0	7	NO	NO	NO	NO	NA	NO	4	Female	Female	Female	Female	Female	Female	Neither	Neither	Female
FBgn0284408	trol	NO	0	0	1	0	1	NO	NO	YES	NO	NA	NO	4	NA	NA	NA	NA	NA	NA	Female	Neither	Neither
FBgn0014189	Hel25E	NO	0	0	8	0	8	NO	NO	NO	NO	NA	NO	4	Female	Female	Female	Female	Female	Female	Female	Female	Neither
FBgn0024921	Tnpo	YES	1	0	2	1	3	NO	NO	NO	NO	NA	NO	4	Neither	Both	Female	NA	NA	NA	Neither	Neither	Female
FBgn0036887	CG9231	YES	6	0	3	6	9	NO	NO	NO	NO	NA	NO	4	Both	Both	Both	Both	Both	Both	Female	Female	Female
FBgn0023095	caps	YES	3	0	1	3	4	NO	NO	NO	NO	NA	NO	4	Neither	Neither	Neither	Both	Both	Both	Neither	Neither	Female
FBgn0266449	Kr-h2	NO	0	0	2	0	2	NO	NO	YES	NO	NA	NO	4	NA	NA	NA	Neither	Neither	Neither	Female	Female	NA
FBgn0034454	CG15120	YES	1	1	0	0	1	NO	NO	NO	NO	NA	NO	0	Neither	Neither	NA	Male	Neither	Neither	Neither	Neither	Neither
FBgn0031935	CG13793	NO	0	0	2	0	2	NO	NO	NO	NO	NA	NO	1	Female	Female	Neither	Neither	Neither	Neither	NA	NA	Neither
FBgn0034734	CG4554	YES	2	0	2	2	4	NO	NO	YES	NO	NA	NO	4	Neither	Neither	Neither	Both	Female	Both	Female	Neither	Neither
FBgn0044826	Pak3	NO	0	0	6	0	6	NO	NO	NO	NO	NA	NO	4	Neither	Neither	Neither	Female	Female	Female	Female	Female	Female
FBgn0266409	CG45049	NO	0	0	7	0	7	NO	NO	NO	NO	NA	NO	4	Female	Female	Neither	Female	Female	Female	Female	Female	Neither
FBgn0036512	CG16979	NO	0	0	1	0	1	NO	NO	NO	NO	NA	NO	4	Neither	Female	Neither	Neither	Neither	Neither	NA	NA	Neither
FBgn0052533	CG32533	NO	0	0	2	0	2	NO	NO	NO	NO	NA	NO	2	Neither	Neither	Neither	NA	NA	NA	Female	Female	Neither
FBgn0027585	CG8740	YES	5	0	4	5	9	NO	NO	YES	NO	NA	NO	4	Both	Female	Both	Both	Both	Both	Female	Female	Female
FBgn0264489	CG43897	YES	3	3	6	0	9	NO	NO	NO	NO	NA	NO	4	Female	Female	Female	Male	Male	Male	Female	Female	Female
FBgn0033998	row	NO	0	0	6	0	6	NO	NO	YES	NO	NA	NO	4	Neither	Neither	Neither	Female	Female	Female	Female	Female	Female
FBgn0036298	nst	YES	3	0	0	3	3	NO	NO	NO	NO	NA	NO	4	Neither	Neither	Neither	Both	Both	Both	Neither	Neither	Neither
FBgn0031868	Rat1	NO	0	0	6	0	6	NO	NO	NO	NO	NA	NO	4	Female	Female	Female	Neither	Neither	Neither	Female	Female	Female
FBgn0038981	CG5346	NO	0	0	3	0	3	NO	NO	NO	NO	NA	NO	4	Neither	Neither	Neither	Female	Female	Female	Neither	Neither	Neither
FBgn0031973	Spn28Dc	NO	0	0	6	0	6	NO	NO	NO	NO	NA	NO	4	Female	Female	Female	Neither	Neither	Neither	Female	Female	Female
FBgn0032456	MRP	NO	0	0	5	0	5	NO	NO	NO	NO	SC	YES	4	Female	Female	Female	Neither	Neither	Neither	Female	Female	Neither
FBgn0030320	CG2247	NO	0	0	3	0	3	NO	NO	NO	NO	NA	NO	4	NA	NA	NA	NA	NA	NA	Female	Female	Female
FBgn0264695	Mhc	YES	1	0	8	1	9	NO	NO	YES	NO	NA	NO	4	Female	Both	Female	Female	Female	Female	Female	Female	Female
FBgn0037553	CG18249	NO	0	0	1	0	1	NO	NO	NO	NO	NA	NO	3	Neither	Neither	Neither	NA	NA	NA	Neither	Neither	Female
FBgn0032601	yellow-b	NO	0	0	3	0	3	NO	NO	NO	NO	NA	NO	1	Female	Female	Female	Neither	Neither	Neither	Neither	Neither	Neither
FBgn0027082	ProRS-m	NO	0	0	9	0	9	NO	NO	NO	NO	NA	NO	3	Female	Female	Female	Female	Female	Female	Female	Female	Female
FBgn0019972	Drice	NO	0	0	2	0	2	NO	NO	NO	NO	NA	NO	4	Neither	Neither	Neither	Neither	Neither	Neither	Female	Female	Neither
FBgn0261859	CG42788	NO	0	0	2	0	2	NO	NO	NO	NO	NA	NO	4	Neither	Neither	Neither	Neither	Neither	Neither	Female	Female	Neither
FBgn0039737	CG7920	YES	8	0	0	8	8	NO	NO	YES	NO	NA	NO	4	Both	Both	Both	Both	Both	Both	Both	Both	Neither
FBgn0036381	CG8745	YES	1	1	0	0	1	NO	NO	NO	NO	NA	NO	3	NA	Neither	Neither	Neither	Neither	Male	Neither	Neither	Neither
FBgn0036886	CG9300	NO	0	0	4	0	4	NO	NO	NO	NO	NA	NO	4	Female	Female	Female	Neither	Neither	Neither	Neither	Neither	Female
FBgn0259711	CG42365	NO	0	0	2	0	2	NO	NO	NO	NO	NA	NO	4	Female	Female	Neither	Neither	Neither	Neither	Neither	NA	Neither
FBgn0034253	CG10936	YES	2	1	1	1	3	NO	NO	NO	NO	NA	NO	0	NA	Neither	NA	NA	Both	Male	Female	Neither	Neither
FBgn0039641	CG14511	NO	0	0	4	0	4	NO	NO	NO	NO	NA	NO	4	Female	Female	Female	Neither	Neither	Neither	Neither	Neither	Female
FBgn0031681	Pgant5	NO	0	0	9	0	9	NO	NO	NO	NO	NA	NO	4	Female	Female	Female	Female	Female	Female	Female	Female	Female
FBgn0035888	CG7120	NO	0	0	2	0	2	NO	NO	NO	NO	NA	NO	4	Female	Female	Neither	Neither	Neither	Neither	Neither	NA	Neither
FBgn0287775	18w	YES	1	0	6	1	7	NO	NO	NO	NO	NA	NO	4	Neither	Female	Neither	Female	Both	Female	Female	Female	Female
FBgn0052251	Claspin	YES	1	0	1	1	2	NO	NO	NO	NO	NA	NO	0	NA	Neither	NA	Both	Female	Neither	NA	NA	NA
FBgn0261872	scaf6	NO	0	0	2	0	2	NO	NO	NO	NO	NA	NO	4	Neither	Neither	Neither	Neither	Neither	Neither	Female	Female	Neither
FBgn0031418	CG3609	NO	0	0	2	0	2	NO	YES	NO	NO	NA	NO	4	Neither	Neither	Neither	Neither	Neither	Neither	Female	Female	Neither
FBgn0260943	Rbp6	YES	1	1	0	0	1	NO	NO	NO	NO	NA	NO	4	Neither	Neither	Neither	Neither	Male	Neither	Neither	Neither	Neither
FBgn0039875	sip3	YES	3	0	0	3	3	NO	NO	NO	NO	NA	NO	4	Both	Both	Both	Neither	Neither	Neither	Neither	Neither	Neither
FBgn0262743	Fs(2)Ket	NO	0	0	3	0	3	NO	NO	NO	NO	NA	NO	4	NA	NA	NA	NA	NA	NA	Female	Female	Female
FBgn0011828	Pxn	YES	1	0	1	1	2	NO	NO	NO	NO	NA	NO	4	Neither	Both	Neither	Neither	Neither	Neither	Female	Neither	NA
FBgn0024285	Srp54	YES	3	0	0	3	3	NO	NO	NO	NO	NA	NO	4	NA	NA	NA	Both	Both	Both	Neither	Neither	Neither
FBgn0034060	Tmem131	NO	0	0	4	0	4	NO	NO	NO	NO	NA	NO	4	Female	Female	Female	Neither	Neither	Neither	Neither	Neither	Female
FBgn0031855	meng	YES	1	0	3	1	4	NO	NO	NO	NO	NA	NO	4	Neither	Female	Neither	Female	Both	Female	Neither	Neither	Neither
FBgn0266019	rudhira	NO	0	0	6	0	6	NO	NO	NO	NO	NA	NO	4	Female	Female	Female	NA	NA	NA	Female	Female	Female
FBgn0025684	MFS18	YES	3	0	3	3	6	NO	NO	NO	NO	NA	NO	4	Both	Both	Both	NA	NA	NA	Female	Female	Female
FBgn0051122	CG31122	NO	0	0	2	0	2	NO	NO	NO	NO	NA	NO	4	Neither	Neither	Neither	Neither	Neither	Neither	Female	Female	Neither
FBgn0263102	psq	NO	0	0	1	0	1	NO	NO	NO	NO	SC	NO	4	Neither	Neither	Neither	NA	NA	NA	Female	Neither	Neither
FBgn0033987	ckn	YES	2	0	3	2	5	NO	NO	NO	NO	NA	NO	4	Neither	Neither	Neither	Both	Female	Both	Female	Female	Neither
FBgn0263782	Hmgcr	NO	0	0	6	0	6	NO	NO	NO	NO	EDC	YES	4	Female	Female	Female	Female	Female	Female	Neither	Neither	Neither
FBgn0031662	CG3792	NO	0	0	9	0	9	NO	YES	NO	NO	NA	YES	4	Female	Female	Female	Female	Female	Female	Female	Female	Female
FBgn0259175	ome	NO	0	0	3	0	3	NO	NO	NO	NO	NA	NO	4	Neither	Neither	Neither	Neither	Female	Female	Female	Neither	Neither
FBgn0034742	CG4294	NO	0	0	5	0	5	NO	NO	NO	NO	NA	NO	4	Neither	Neither	Neither	Female	Female	Female	Female	Female	Neither
FBgn0033316	Gle1	YES	2	0	4	2	6	NO	NO	NO	NO	NA	NO	3	Female	Female	Female	Female	Both	Both	Neither	Neither	Neither
FBgn0087007	bbg	YES	2	0	7	2	9	NO	NO	YES	NO	NA	NO	4	Female	Female	Female	Both	Female	Both	Female	Female	Female
FBgn0020622	Pi3K21B	NO	0	0	6	0	6	NO	NO	NO	NO	NA	NO	4	Neither	Neither	Neither	Female	Female	Female	Female	Female	Female
FBgn0005674	GluProRS	NO	0	0	7	0	7	NO	NO	YES	NO	NA	NO	4	Female	Female	Female	Female	Female	Female	Neither	Neither	Female
FBgn0064766	CG7600	NO	0	0	7	0	7	NO	NO	NO	NO	NA	NO	4	Female	Female	Female	Female	Female	Female	Neither	Neither	Female
FBgn0034177	AsnRS-m	YES	6	3	0	3	6	NO	NO	NO	NO	NA	NO	2	Both	Both	Both	Male	Male	Male	Neither	Neither	Neither
FBgn0039013	CG4813	NO	0	0	7	0	7	NO	NO	NO	NO	NA	NO	4	Female	Female	Female	Female	Female	Female	Neither	Neither	Female
FBgn0046763	CG17278	NO	0	0	2	0	2	NO	NO	NO	NO	NA	NO	4	Neither	Neither	Neither	Neither	Neither	Neither	Female	Female	Neither
FBgn0037819	Phyhd1	YES	3	0	2	3	5	NO	NO	NO	NO	NA	NO	4	Neither	Neither	Neither	Both	Both	Both	Female	Female	Neither
FBgn0010516	wal	NO	0	0	6	0	6	NO	NO	YES	NO	NA	NO	4	Neither	Neither	Neither	Female	Female	Female	Female	Female	Female
FBgn0039204	CG6607	NO	0	0	1	0	1	NO	NO	NO	NO	NA	NO	4	Neither	Neither	Neither	NA	NA	NA	Neither	Neither	Female
FBgn0032191	Snx17	NO	0	0	3	0	3	NO	NO	NO	NO	NA	NO	4	Female	Female	Female	Neither	Neither	Neither	Neither	Neither	Neither
FBgn0051871	CG31871	NO	0	0	5	0	5	NO	NO	NO	NO	NA	NO	0	Female	Female	Female	Neither	Female	Female	Neither	Neither	Neither
FBgn0035165	CG13887	YES	6	0	2	6	8	NO	YES	YES	NO	NA	YES	4	Both	Both	Both	Both	Both	Both	Female	Female	Neither
FBgn0261984	Ire1	NO	0	0	5	0	5	NO	NO	NO	NO	NA	NO	4	Female	Neither	Female	Female	Female	Female	Neither	Neither	Neither
FBgn0035649	CG10483	NO	0	0	2	0	2	NO	NO	NO	NO	NA	NO	4	Female	Female	NA	Neither	Neither	Neither	Neither	NA	NA
FBgn0050344	CG30344	NO	0	0	4	0	4	NO	NO	NO	NO	NA	NO	4	Female	Female	Female	Neither	Neither	Neither	Neither	Neither	Female
FBgn0024732	Drep1	NO	0	0	9	0	9	NO	NO	NO	NO	NA	NO	3	Female	Female	Female	Female	Female	Female	Female	Female	Female
FBgn0034436	CG11961	NO	0	0	4	0	4	NO	NO	NO	NO	NA	NO	4	Neither	Neither	Neither	Female	Female	Female	Neither	Female	Neither
FBgn0035158	CG13895	NO	0	0	5	0	5	NO	NO	NO	NO	NA	NO	4	Neither	Neither	Neither	Female	Female	Female	Female	Female	Neither
FBgn0034240	MESR4	NO	0	0	6	0	6	NO	NO	NO	NO	NA	NO	4	Female	Female	Female	Neither	Neither	Neither	Female	Female	Female
FBgn0031972	Wwox	NO	0	0	6	0	6	NO	NO	NO	NO	NA	NO	2	Female	Female	Female	Female	Female	Female	Neither	Neither	Neither
FBgn0032244	RfC3	NO	0	0	3	0	3	NO	NO	NO	NO	NA	NO	2	Female	Female	Female	NA	NA	NA	Neither	Neither	NA
FBgn0036121	CG6310	NO	0	0	2	0	2	NO	NO	NO	NO	NA	NO	2	Neither	Neither	Neither	Neither	Neither	Neither	Female	Female	Neither
FBgn0051370	CG31370	NO	0	0	6	0	6	NO	NO	NO	NO	NA	NO	4	Female	Female	Female	NA	NA	NA	Female	Female	Female
FBgn0038686	CG5555	YES	3	3	1	0	4	NO	NO	NO	NO	NA	NO	4	Neither	Neither	Neither	Male	Male	Male	Neither	Neither	Female
FBgn0034246	Dcr-2	NO	0	0	1	0	1	NO	NO	NO	NO	NA	NO	4	Neither	Neither	Neither	Neither	Neither	Neither	Neither	Neither	Female
FBgn0263776	CG43693	YES	6	3	3	3	9	NO	NO	NO	NO	NA	NO	4	Both	Both	Both	Male	Male	Male	Female	Female	Female
FBgn0039623	CG1951	YES	3	0	2	3	5	NO	NO	NO	NO	NA	NO	4	Neither	Neither	Neither	Both	Both	Both	Female	Female	Neither
FBgn0086358	Tab2	YES	3	0	2	3	5	NO	NO	NO	NO	NA	NO	4	Both	Both	Both	Neither	Neither	Neither	Female	Female	NA
FBgn0002524	lace	NO	0	0	2	0	2	NO	NO	NO	NO	NA	NO	4	NA	NA	NA	Neither	Neither	Neither	Neither	Female	Female
FBgn0034118	Nup62	NO	0	0	1	0	1	NO	NO	NO	NO	NA	NO	4	Neither	Neither	Neither	Neither	Neither	Neither	Neither	Neither	Female
FBgn0031378	CG15362	NO	0	0	1	0	1	NO	NO	NO	NO	NA	NO	4	Neither	Neither	Neither	Neither	Neither	Neither	Neither	Neither	Female
FBgn0034071	CG8405	NO	0	0	1	0	1	NO	NO	YES	NO	NA	NO	4	Neither	Neither	Neither	Neither	Neither	Neither	Neither	Neither	Female
FBgn0050375	CG30375	NO	0	0	1	0	1	NO	NO	NO	NO	NA	NO	0	Neither	Neither	Neither	Neither	Neither	Neither	Neither	Neither	Female
FBgn0039527	CG5639	NO	0	0	2	0	2	NO	NO	NO	NO	NA	NO	4	NA	Neither	Neither	Female	Neither	Female	Neither	Neither	Neither
FBgn0040238	Best1	NO	0	0	1	0	1	NO	NO	NO	NO	NA	NO	4	Neither	Neither	Neither	Neither	Neither	Neither	Neither	Neither	Female
FBgn0034109	CG7747	NO	0	0	3	0	3	NO	NO	NO	NO	NA	NO	4	Neither	Neither	Neither	NA	Neither	NA	Female	Female	Female
FBgn0035710	SP1173	NO	0	0	6	0	6	NO	NO	NO	NO	NA	NO	4	Female	Female	Female	Female	Female	Female	Neither	NA	NA
FBgn0262524	ver	YES	3	3	2	0	5	NO	NO	NO	NO	NA	NO	4	Female	Female	Neither	Male	Male	Male	Neither	Neither	Neither
FBgn0036980	RhoBTB	NO	0	0	2	0	2	NO	NO	NO	NO	NA	NO	4	NA	NA	NA	NA	NA	NA	Female	Female	Neither
FBgn0031777	CG9154	NO	0	0	2	0	2	NO	NO	NO	NO	NA	NO	1	NA	NA	NA	Neither	Neither	Neither	Female	Female	NA
FBgn0024234	gbb	YES	3	3	0	0	3	YES	YES	NO	NO	NA	NO	4	NA	NA	NA	Male	Male	Male	NA	NA	NA
FBgn0038767	trem	NO	0	0	3	0	3	NO	NO	NO	NO	NA	NO	1	Female	Female	Female	Neither	Neither	Neither	Neither	Neither	Neither
FBgn0052438	SMC5	YES	2	0	1	2	3	NO	NO	NO	NO	NA	NO	3	Both	Both	Female	NA	NA	NA	Neither	Neither	NA
FBgn0036662	CG9706	YES	6	0	3	6	9	NO	NO	NO	NO	NA	NO	4	Both	Both	Both	Both	Both	Both	Female	Female	Female
FBgn0035871	BI-1	YES	1	0	5	1	6	NO	NO	YES	NO	NA	NO	4	Both	Female	Female	Female	Female	Female	Neither	Neither	Neither
FBgn0267337	rn	YES	1	1	1	0	2	NO	NO	NO	NO	NA	NO	0	NA	Male	NA	NA	Female	NA	Neither	NA	NA
FBgn0037533	CD98hc	YES	3	0	1	3	4	NO	NO	NO	NO	NA	NO	4	Both	Both	Both	Neither	Neither	Neither	Female	Neither	Neither
FBgn0051793	CG31793	YES	4	0	2	4	6	NO	NO	NO	NO	NA	NO	4	Both	Female	Female	Both	Both	Both	NA	NA	Neither
FBgn0004240	DptA	NO	0	0	1	0	1	NO	NO	NO	NO	NA	NO	1	Female	Neither	Neither	NA	NA	NA	NA	NA	NA
FBgn0013531	MED20	NO	0	0	3	0	3	NO	NO	NO	NO	NA	NO	2	Neither	Neither	Neither	Female	Female	Female	Neither	Neither	Neither
FBgn0032246	Wdfy2	NO	0	0	2	0	2	NO	NO	NO	NO	NA	NO	4	Neither	Neither	Neither	Neither	Neither	Neither	Female	Female	NA
FBgn0031590	CG3702	YES	3	0	1	3	4	NO	NO	NO	NO	NA	NO	4	Both	Both	Both	Neither	Neither	Neither	Neither	Neither	Female
FBgn0033259	Tmem63	NO	0	0	1	0	1	NO	NO	NO	NO	NA	NO	4	Neither	Neither	Neither	Neither	Neither	Neither	Neither	Neither	Female
FBgn0002526	LanA	YES	1	0	1	1	2	NO	NO	YES	NO	NA	NO	4	Neither	Both	NA	Neither	Female	Neither	Neither	NA	Neither
FBgn0086757	cbs	YES	6	0	3	6	9	NO	NO	NO	NO	NA	NO	4	Both	Both	Both	Both	Both	Both	Female	Female	Female
FBgn0026593	CG5707	YES	1	0	4	1	5	NO	NO	NO	NO	NA	NO	4	Neither	Neither	Neither	Both	Female	Female	Female	Female	Neither
FBgn0003255	rk	NO	0	0	2	0	2	NO	NO	NO	NO	NA	NO	0	NA	Neither	Neither	NA	Female	Female	NA	NA	Neither
FBgn0263316	Mrp4	YES	4	1	4	3	8	NO	NO	NO	NO	NA	NO	4	Female	Both	Female	Male	Both	Both	Female	Neither	Female
FBgn0005649	Rox8	NO	0	0	9	0	9	NO	NO	NO	NO	NA	NO	4	Female	Female	Female	Female	Female	Female	Female	Female	Female
FBgn0015795	Rab7	YES	3	0	2	3	5	NO	NO	YES	NO	NA	NO	4	Both	Both	Both	NA	NA	NA	Female	Female	Neither
FBgn0034191	CG6984	NO	0	0	1	0	1	NO	NO	NO	NO	NA	NO	3	Neither	Neither	Neither	Neither	Neither	Neither	NA	NA	Female
FBgn0031835	CG11319	NO	0	0	3	0	3	NO	NO	NO	NO	NA	NO	4	Neither	NA	Neither	Female	NA	Female	NA	Neither	Female
FBgn0042129	OS9	YES	1	1	0	0	1	NO	NO	NO	NO	NA	NO	0	Male	Neither	NA	Neither	Neither	Neither	Neither	Neither	NA
FBgn0051158	Efa6	YES	1	0	2	1	3	NO	NO	NO	NO	NA	NO	4	Neither	Neither	Neither	Neither	Both	Female	Female	Neither	Neither
FBgn0038829	CG17271	YES	3	0	1	3	4	YES	NO	NO	NO	NA	NO	4	Neither	Neither	Neither	Both	Both	Both	Neither	Neither	Female
FBgn0052039	Svip	NO	0	0	2	0	2	NO	NO	NO	NO	NA	NO	4	Neither	Neither	Neither	NA	NA	NA	Female	Female	Neither
FBgn0024558	Dph5	YES	4	1	2	3	6	NO	NO	NO	NO	NA	NO	4	Both	Both	Female	Male	Both	Neither	Neither	Neither	Female
FBgn0003310	S	YES	2	0	7	2	9	NO	NO	NO	NO	NA	NO	4	Female	Both	Both	Female	Female	Female	Female	Female	Female
FBgn0035674	CG13295	NO	0	0	5	0	5	NO	NO	NO	NO	NA	NO	4	Neither	Neither	Neither	Female	Female	Female	Female	Female	Neither
FBgn0001986	Mtr4	NO	0	0	7	0	7	NO	NO	NO	NO	NA	NO	4	Female	Female	Female	Female	Female	Female	Neither	Neither	Female
FBgn0260985	RfC4	NO	0	0	8	0	8	NO	NO	NO	NO	NA	NO	3	Female	Neither	Female	Female	Female	Female	Female	Female	Female
FBgn0034275	CG5002	YES	3	0	6	3	9	NO	NO	NO	NO	NA	NO	3	Both	Both	Both	Female	Female	Female	Female	Female	Female
FBgn0051414	Gba1b	NO	0	0	6	0	6	NO	NO	NO	NO	NA	NO	0	Neither	Neither	Neither	Female	Female	Female	Female	Female	Female
FBgn0003137	Ppn	YES	1	0	5	1	6	NO	NO	YES	NO	NA	NO	4	Female	Both	NA	Female	Female	Female	Female	Neither	Neither
FBgn0050295	Ipk1	NO	0	0	1	0	1	NO	NO	NO	NO	NA	NO	1	Neither	Female	Neither	NA	NA	NA	Neither	NA	Neither
FBgn0033564	Pex6	NO	0	0	4	0	4	NO	NO	NO	NO	NA	NO	4	Female	Female	Neither	NA	NA	NA	Female	Female	Neither
FBgn0260856	Membrin	NO	0	0	3	0	3	NO	NO	NO	NO	NA	NO	4	Female	Female	Female	NA	NA	NA	NA	NA	Neither
FBgn0000014	abd-A	NO	0	0	3	0	3	NO	NO	NO	NO	SC	YES	4	NA	Female	Female	Neither	Neither	Neither	Neither	Neither	Female
FBgn0033783	CG17019	NO	0	0	5	0	5	NO	NO	NO	NO	NA	NO	4	Neither	Neither	Neither	Female	Female	Female	Female	Female	NA
FBgn0038862	Usp8	NO	0	0	9	0	9	NO	NO	NO	NO	NA	NO	4	Female	Female	Female	Female	Female	Female	Female	Female	Female
FBgn0024187	syd	NO	0	0	4	0	4	NO	NO	NO	NO	MC	YES	4	Female	Female	Female	Neither	Neither	Neither	Neither	Neither	Female
FBgn0035997	phol	NO	0	0	1	0	1	NO	NO	NO	NO	NA	NO	4	NA	NA	NA	Neither	Neither	Neither	Neither	Neither	Female
FBgn0034442	CG11257	YES	6	1	0	5	6	NO	NO	NO	NO	NA	NO	2	Both	Both	Both	Both	Both	Male	Neither	Neither	Neither
FBgn0036008	CG3408	NO	0	0	9	0	9	NO	NO	NO	NO	NA	NO	3	Female	Female	Female	Female	Female	Female	Female	Female	Female
FBgn0032485	CG9426	NO	0	0	6	0	6	NO	NO	NO	NO	NA	NO	4	Female	Female	Female	Neither	Neither	Neither	Female	Female	Female
FBgn0008635	betaCOP	NO	0	0	2	0	2	NO	NO	NO	NO	NA	NO	4	NA	NA	NA	NA	NA	NA	Female	Female	Neither
FBgn0019968	Khc-73	NO	0	0	4	0	4	NO	NO	NO	NO	NA	NO	4	Neither	Female	Female	Neither	Female	Female	Neither	Neither	Neither
FBgn0038925	Cchl	NO	0	0	3	0	3	NO	NO	NO	NO	NA	NO	4	Female	Female	Female	Neither	Neither	Neither	Neither	Neither	Neither
FBgn0031381	Npc2a	NO	0	0	6	0	6	NO	YES	NO	NO	NA	YES	4	Female	Female	Female	Neither	Neither	Neither	Female	Female	Female
FBgn0032253	LManI	NO	0	0	5	0	5	NO	NO	NO	NO	NA	NO	3	Female	Female	NA	Female	Female	Female	Neither	Neither	Neither
FBgn0031143	CG1532	NO	0	0	1	0	1	NO	NO	YES	NO	NA	NO	4	NA	NA	NA	NA	NA	NA	NA	NA	Female
FBgn0028670	Vha100-2	NO	0	0	7	0	7	NO	NO	YES	NO	NA	NO	4	Female	Female	Female	Female	Female	Female	Neither	Neither	Female
FBgn0039846	PNPase	NO	0	0	2	0	2	NO	NO	NO	NO	NA	NO	3	Female	Female	Neither	Neither	Neither	Neither	Neither	Neither	Neither
FBgn0031886	Nuf2	NO	0	0	4	0	4	NO	NO	NO	NO	NA	NO	0	Neither	Female	Neither	Female	Female	Female	Neither	NA	NA
FBgn0036663	CG9674	YES	2	0	7	2	9	NO	NO	YES	NO	NA	NO	4	Female	Female	Female	Female	Both	Both	Female	Female	Female
FBgn0000326	clt	YES	3	0	6	3	9	NO	NO	NO	NO	NA	NO	4	Both	Both	Both	Female	Female	Female	Female	Female	Female
FBgn0034489	ppk6	NO	0	0	1	0	1	NO	NO	NO	NO	NA	NO	0	NA	Female	Neither	NA	NA	NA	NA	NA	NA
FBgn0263998	Ack-like	NO	0	0	4	0	4	NO	NO	NO	NO	NA	NO	4	Female	Female	Female	Neither	Neither	Neither	Neither	Neither	Female
FBgn0035410	MnM	NO	0	0	3	0	3	NO	NO	NO	NO	NA	NO	4	NA	Female	NA	Neither	Female	NA	Female	NA	Neither
FBgn0038412	Zip89B	YES	3	0	0	3	3	NO	NO	NO	NO	NA	NO	0	Both	Both	Both	Neither	Neither	Neither	Neither	Neither	Neither
FBgn0016013	Faa	NO	0	0	3	0	3	NO	NO	NO	NO	NA	NO	4	Female	Neither	Female	Neither	Neither	Neither	Neither	Neither	Female
FBgn0026179	siz	NO	0	0	3	0	3	NO	NO	NO	NO	NA	NO	4	Neither	Neither	Neither	NA	NA	NA	Female	Female	Female
FBgn0260936	scny	YES	3	0	2	3	5	NO	NO	NO	NO	NA	NO	4	Both	Both	Both	Neither	Neither	Neither	Female	Female	Neither
FBgn0039508	CG3368	YES	3	0	6	3	9	NO	NO	NO	NO	NA	NO	4	Both	Both	Both	Female	Female	Female	Female	Female	Female
FBgn0029830	Grip	NO	0	0	3	0	3	NO	NO	NO	NO	NA	NO	4	Female	Female	Neither	NA	NA	NA	Female	NA	Neither
FBgn0261477	slim	YES	6	0	0	6	6	NO	NO	NO	NO	NA	NO	4	Both	Both	Both	Both	Both	Both	Neither	Neither	Neither
FBgn0024315	Picot	YES	3	0	3	3	6	NO	NO	NO	NO	NA	NO	4	NA	NA	NA	Both	Both	Both	Female	Female	Female
FBgn0052423	shep	NO	0	0	1	0	1	NO	NO	NO	NO	SC	YES	4	Neither	Female	Neither	Neither	Neither	Neither	Neither	Neither	Neither
FBgn0032454	CG5787	YES	3	0	0	3	3	NO	NO	NO	NO	NA	NO	4	Both	Both	Both	Neither	Neither	Neither	Neither	Neither	Neither
FBgn0035383	CPT2	YES	3	0	1	3	4	NO	NO	NO	NO	NA	NO	4	Both	Both	Both	Neither	Neither	Neither	Neither	Neither	Female
FBgn0036136	Ufd1	YES	3	0	2	3	5	NO	NO	NO	NO	NA	NO	4	Both	Both	Both	Female	Female	Neither	Neither	Neither	Neither
FBgn0029155	Men-b	YES	3	0	4	3	7	NO	NO	NO	NO	NA	NO	4	Both	Both	Both	Female	Female	Female	Neither	Neither	Female
FBgn0012051	CalpA	NO	0	0	2	0	2	NO	NO	NO	NO	NA	NO	4	Neither	Neither	Neither	Neither	Neither	Neither	Female	Female	Neither
FBgn0051004	mesh	NO	0	0	4	0	4	NO	NO	NO	NO	NA	NO	1	Female	NA	Female	Neither	Neither	Neither	NA	Female	Female
FBgn0013756	Mtor	NO	0	0	8	0	8	NO	NO	NO	NO	NA	NO	4	Female	Neither	Female	Female	Female	Female	Female	Female	Female
FBgn0052446	Atox1	NO	0	0	1	0	1	NO	NO	NO	NO	NA	NO	4	Neither	Neither	Female	NA	NA	NA	Neither	Neither	Neither
FBgn0042180	CG18870	YES	1	0	0	1	1	NO	NO	NO	NO	NA	NO	2	Neither	Neither	Both	Neither	Neither	Neither	Neither	Neither	Neither
FBgn0020307	dve	NO	0	0	2	0	2	NO	YES	NO	NO	SC	YES	0	Neither	Female	NA	Neither	Neither	Neither	Female	NA	Neither
FBgn0052479	Usp10	YES	5	0	4	5	9	NO	NO	NO	NO	NA	NO	4	Both	Both	Both	Female	Both	Both	Female	Female	Female
FBgn0032082	CG18088	NO	0	0	6	0	6	NO	NO	NO	NO	NA	NO	0	Female	Female	Female	NA	Neither	Female	Neither	Female	Female
FBgn0001124	Got1	NO	0	0	3	0	3	NO	NO	YES	NO	NA	NO	4	Female	Female	Female	Neither	Neither	Neither	Neither	Neither	Neither
FBgn0032194	CG4901	NO	0	0	6	0	6	NO	NO	NO	NO	NA	NO	4	Female	Female	Female	Female	Female	Female	Neither	Neither	Neither
FBgn0261963	mid	NO	0	0	1	0	1	NO	NO	NO	NO	NA	NO	0	NA	Neither	NA	NA	Female	NA	Neither	NA	NA
FBgn0035798	frac	YES	3	3	2	0	5	NO	NO	NO	NO	NA	NO	0	Neither	Neither	Neither	Male	Male	Male	Female	Female	Neither
FBgn0039419	CG12290	NO	0	0	3	0	3	NO	NO	NO	NO	NA	NO	4	Neither	Neither	Neither	Female	Female	Female	Neither	Neither	Neither
FBgn0082582	tmod	YES	1	0	2	1	3	NO	NO	NO	NO	MC	YES	4	Neither	Both	Neither	Neither	Neither	Neither	Female	Neither	Female
FBgn0040233	cana	NO	0	0	2	0	2	NO	NO	NO	NO	NA	NO	4	Neither	Female	Female	Neither	Neither	Neither	Neither	Neither	Neither
FBgn0029824	CG3726	NO	0	0	1	0	1	NO	NO	NO	NO	NA	NO	4	NA	NA	NA	NA	NA	NA	Neither	Neither	Female
FBgn0031057	Ubqn	NO	0	0	1	0	1	NO	NO	NO	NO	NA	NO	4	NA	NA	NA	NA	NA	NA	NA	NA	Female
FBgn0050183	CG30183	NO	0	0	3	0	3	NO	NO	NO	NO	NA	NO	2	Neither	Neither	Neither	Female	Female	Female	Neither	Neither	Neither
FBgn0033021	CG10417	NO	0	0	1	0	1	NO	NO	NO	NO	NA	NO	4	NA	NA	NA	NA	NA	NA	Neither	Neither	Female
FBgn0032726	CG10621	NO	0	0	3	0	3	NO	NO	NO	NO	NA	NO	4	NA	NA	NA	Female	Female	Female	Neither	Neither	Neither
FBgn0000163	baz	NO	0	0	1	0	1	NO	NO	NO	NO	NA	NO	4	NA	NA	Neither	NA	NA	Neither	Neither	Neither	Female
FBgn0004049	yrt	NO	0	0	1	0	1	NO	NO	NO	NO	NA	NO	4	Neither	Neither	Neither	Neither	Neither	Neither	Neither	Neither	Female
FBgn0036124	CG7839	YES	3	3	2	0	5	NO	NO	NO	NO	NA	NO	3	Neither	Neither	Neither	Male	Male	Male	Female	Female	Neither
FBgn0265487	mbl	YES	3	0	6	3	9	NO	NO	NO	NO	SC	YES	4	Female	Both	Both	Female	Both	Female	Female	Female	Female
FBgn0034113	CG8060	YES	3	3	3	0	6	NO	NO	NO	NO	NA	NO	4	Female	Female	Female	Male	Male	Male	Neither	Neither	Neither
FBgn0039632	Cul5	NO	0	0	3	0	3	NO	NO	NO	NO	NA	NO	4	NA	NA	NA	Female	Female	Female	NA	NA	Neither
FBgn0026376	Rgl	YES	4	1	3	3	7	NO	NO	NO	NO	NA	NO	4	Female	Both	Male	Female	Both	Both	Female	Neither	Neither
FBgn0031925	Cyp4d21	NO	0	0	2	0	2	NO	NO	NO	NO	NA	NO	0	Neither	NA	NA	Female	Neither	Female	NA	NA	NA
FBgn0000504	dsx	NO	0	0	2	0	2	NO	NO	NO	NO	NA	NO	4	Neither	Neither	Female	Neither	Neither	Neither	Neither	Neither	Female
FBgn0039727	Vps13B	YES	4	0	4	4	8	NO	NO	YES	NO	NA	NO	4	Both	Female	Both	Both	Female	Both	Female	Female	Neither
FBgn0036518	RhoGAP71E	YES	2	0	2	2	4	NO	NO	NO	NO	NA	NO	4	Neither	Neither	Neither	Female	Both	Both	Neither	Neither	Female
FBgn0028970	RabGGTb	YES	3	0	6	3	9	NO	NO	NO	NO	NA	NO	4	Both	Both	Both	Female	Female	Female	Female	Female	Female
FBgn0039628	CG11841	YES	3	1	2	2	5	NO	NO	NO	NO	NA	NO	4	Neither	Neither	Neither	Male	Both	Both	Female	Female	Neither
FBgn0002901	mus304	YES	2	0	4	2	6	NO	NO	NO	NO	NA	NO	2	Female	Female	Female	Both	Female	Both	Neither	Neither	NA
FBgn0038872	Nelf-A	NO	0	0	3	0	3	NO	NO	NO	NO	NA	NO	4	Female	Female	Female	Neither	Neither	Neither	Neither	Neither	Neither
FBgn0086408	stl	NO	0	0	2	0	2	NO	NO	NO	NO	NA	NO	1	NA	Neither	Neither	NA	NA	Female	NA	Female	Neither
FBgn0035153	ebd1	NO	0	0	5	0	5	NO	NO	NO	NO	NA	NO	1	NA	NA	NA	Female	Female	Female	Female	Female	Neither
FBgn0033814	Qsox1	YES	2	0	1	2	3	NO	NO	NO	NO	NA	NO	4	Both	Both	Female	Neither	Neither	Neither	Neither	Neither	Neither
FBgn0085400	side-V	YES	1	1	0	0	1	NO	NO	NO	NO	NA	NO	4	NA	Neither	Neither	NA	Male	Neither	Neither	NA	Neither
FBgn0261673	nemy	YES	2	0	4	2	6	NO	NO	NO	NO	NA	NO	4	Female	Female	Female	Both	Both	Female	NA	NA	Neither
FBgn0030926	psh	NO	0	0	1	0	1	NO	NO	NO	NO	NA	NO	0	NA	NA	NA	NA	NA	NA	NA	NA	Female
FBgn0035360	CG1246	NO	0	0	2	0	2	NO	NO	NO	NO	NA	NO	0	Neither	NA	NA	Neither	Female	Female	NA	NA	Neither
FBgn0039633	Bicra	NO	0	0	4	0	4	NO	NO	NO	NO	NA	NO	4	Female	Female	Neither	Neither	Female	Female	Neither	Neither	Neither
FBgn0036659	CG9701	NO	0	0	5	0	5	NO	NO	NO	NO	NA	NO	0	Neither	NA	Neither	Female	Neither	Female	Female	Female	Female
FBgn0034420	CG10737	NO	0	0	4	0	4	NO	NO	NO	NO	NA	NO	4	Neither	Neither	Neither	Female	Female	Female	Neither	Neither	Female
FBgn0032536	Ance-3	YES	2	0	1	2	3	NO	NO	NO	NO	NA	NO	0	Both	Female	Both	Neither	Neither	Neither	Neither	Neither	Neither
FBgn0036368	CG10738	NO	0	0	1	0	1	NO	NO	NO	NO	NA	NO	0	Female	NA	NA	Neither	NA	NA	NA	NA	NA
FBgn0042135	Gdap2	NO	0	0	1	0	1	NO	NO	NO	NO	NA	NO	4	NA	Neither	Neither	Neither	Female	Neither	Neither	Neither	Neither
FBgn0031490	CG17264	NO	0	0	1	0	1	NO	NO	NO	NO	NA	NO	1	Neither	Neither	Neither	NA	Neither	Neither	Female	Neither	NA
FBgn0034265	Snx16	YES	1	1	1	0	2	NO	NO	NO	NO	NA	NO	4	Neither	Male	Female	NA	NA	NA	Neither	Neither	NA
FBgn0029831	CG5966	NO	0	0	3	0	3	NO	NO	NO	YES	NA	NO	3	Female	Neither	NA	NA	NA	NA	Female	Female	Neither
FBgn0035945	CG5026	NO	0	0	9	0	9	NO	NO	NO	NO	NA	NO	4	Female	Female	Female	Female	Female	Female	Female	Female	Female
FBgn0004167	kst	NO	0	0	8	0	8	NO	NO	NO	NO	NA	NO	4	Female	Female	Female	Female	Female	Female	Female	Female	Neither
FBgn0038984	AdipoR	YES	3	1	0	2	3	NO	NO	NO	NO	NA	NO	4	Neither	Neither	Neither	Male	Both	Both	Neither	Neither	Neither
FBgn0040064	yip2	NO	0	0	8	0	8	NO	NO	YES	NO	NA	NO	4	Female	Female	Female	Female	Female	Female	Female	Female	Neither
FBgn0034606	ASPP	YES	2	0	5	2	7	NO	NO	NO	NO	NA	NO	4	Female	Both	Both	Neither	Neither	Female	Female	Female	Female
FBgn0040228	DCTN5-p25	NO	0	0	3	0	3	NO	NO	NO	NO	NA	NO	4	Neither	Neither	Neither	Female	Female	Female	Neither	Neither	Neither
FBgn0001216	Hsc70-1	NO	0	0	1	0	1	NO	NO	YES	NO	NA	NO	4	Neither	Neither	NA	Neither	Female	NA	Neither	NA	Neither
FBgn0020018	Ppox	NO	0	0	8	0	8	NO	NO	NO	NO	NA	NO	4	Female	Female	Female	Female	Female	Female	Female	Female	Neither
FBgn0039537	Hsdl2	NO	0	0	3	0	3	NO	NO	NO	NO	NA	NO	4	NA	NA	NA	Female	Female	Female	Neither	Neither	Neither
FBgn0034304	CG5742	YES	2	0	1	2	3	NO	NO	NO	NO	NA	NO	4	Female	Both	Both	Neither	Neither	Neither	Neither	Neither	Neither
FBgn0038968	CG12499	NO	0	0	3	0	3	NO	NO	NO	NO	NA	NO	4	Neither	Neither	Neither	Female	Female	Female	Neither	Neither	Neither
FBgn0035688	fmt	YES	3	3	4	0	7	NO	NO	NO	NO	NA	NO	4	Female	Female	Female	Male	Male	Male	Neither	Neither	Female
FBgn0030354	Upf1	NO	0	0	2	0	2	NO	NO	NO	NO	NA	NO	4	NA	NA	NA	NA	NA	NA	Female	Female	Neither
FBgn0033916	Usp20-33	NO	0	0	3	0	3	NO	NO	NO	NO	NA	NO	4	Female	Female	Female	Neither	Neither	Neither	Neither	Neither	Neither
FBgn0003278	Polr1B	YES	3	0	0	3	3	NO	NO	NO	NO	NA	NO	3	Neither	Neither	Neither	Both	Both	Both	Neither	Neither	NA
FBgn0033387	CG8008	YES	4	0	3	4	7	NO	NO	NO	NO	NA	NO	4	Female	Both	Neither	Both	Both	Both	Female	Neither	Female
FBgn0028487	f-cup	YES	3	0	0	3	3	NO	NO	NO	NO	NA	NO	4	Both	Both	Both	Neither	Neither	Neither	Neither	Neither	Neither
FBgn0039644	rdog	NO	0	0	4	0	4	NO	NO	NO	NO	NA	NO	4	Female	Female	Female	Neither	Neither	Neither	Neither	NA	Female
FBgn0264895	RapGAP1	YES	3	0	6	3	9	NO	NO	NO	NO	NA	NO	4	Female	Female	Female	Both	Both	Both	Female	Female	Female
FBgn0012042	AttA	NO	0	0	2	0	2	NO	NO	NO	NO	NA	NO	0	Neither	Neither	Neither	Neither	NA	NA	Female	Female	NA
FBgn0029506	Tsp42Ee	YES	3	0	6	3	9	NO	NO	YES	NO	NA	NO	4	Female	Female	Female	Both	Both	Both	Female	Female	Female
FBgn0263278	Fic	NO	0	0	5	0	5	NO	NO	NO	NO	NA	NO	4	Neither	Neither	Neither	Female	Female	Female	Female	Female	Neither
FBgn0034748	CG17807	NO	0	0	2	0	2	NO	NO	NO	NO	NA	NO	3	Neither	Neither	Neither	Neither	Neither	Neither	Female	Female	Neither
FBgn0033760	CG8785	YES	3	0	1	3	4	NO	NO	NO	NO	NA	NO	1	Neither	Neither	Neither	Both	Both	Both	Neither	Neither	Female
FBgn0032083	CG9541	NO	0	0	4	0	4	NO	NO	NO	NO	NA	NO	0	Female	Female	Female	NA	NA	Female	NA	Neither	Neither
FBgn0034258	eIF3c	YES	3	0	0	3	3	NO	NO	NO	NO	NA	NO	4	Both	Both	Both	Neither	Neither	Neither	Neither	Neither	Neither
FBgn0061200	Nup153	NO	0	0	3	0	3	NO	NO	NO	NO	NA	NO	4	Neither	Neither	Neither	Neither	Neither	Neither	Female	Female	Female
FBgn0051133	Slimp	NO	0	0	6	0	6	NO	NO	NO	NO	NA	NO	2	Female	Female	Female	Female	Female	Female	NA	NA	NA
FBgn0030208	PPP4R2r	NO	0	0	3	0	3	NO	NO	NO	NO	NA	NO	4	NA	NA	NA	Female	Female	Female	Neither	Neither	Neither
FBgn0028983	Spn55B	YES	3	0	0	3	3	NO	NO	NO	NO	NA	NO	4	Both	Both	Both	Neither	Neither	Neither	Neither	Neither	NA
FBgn0025681	CG3558	YES	2	0	1	2	3	NO	NO	NO	NO	NA	NO	4	Both	Both	Female	Neither	Neither	Neither	NA	NA	Neither
FBgn0086346	ALiX	NO	0	0	6	0	6	NO	NO	NO	NO	NA	NO	4	NA	NA	NA	Female	Female	Female	Female	Female	Female
FBgn0034083	lbk	YES	6	0	0	6	6	NO	NO	NO	NO	NA	NO	4	Both	Both	Both	Both	Both	Both	Neither	Neither	Neither
FBgn0037440	CRAT	NO	0	0	6	0	6	NO	NO	NO	NO	NA	NO	4	Female	Female	Female	Female	Female	Female	Neither	Neither	Neither
FBgn0032258	Cog4	NO	0	0	6	0	6	NO	NO	NO	NO	NA	NO	4	Neither	Neither	Neither	Female	Female	Female	Female	Female	Female
FBgn0035144	Kah	NO	0	0	3	0	3	NO	NO	NO	NO	NA	NO	3	NA	Neither	NA	Neither	Female	Female	Female	Neither	Neither
FBgn0259682	Jabba	YES	6	3	0	3	6	NO	NO	NO	NO	NA	NO	4	Both	Both	Both	Male	Male	Male	Neither	Neither	Neither
FBgn0030342	CG10347	NO	0	0	1	0	1	NO	NO	NO	NO	NA	NO	4	NA	NA	NA	NA	NA	NA	NA	NA	Female
FBgn0036372	Abp1	YES	3	0	3	3	6	NO	NO	NO	NO	NA	NO	4	Female	Female	Female	Both	Both	Both	Neither	Neither	Neither
FBgn0032748	CG10492	NO	0	0	3	0	3	NO	NO	NO	NO	NA	NO	4	Neither	Neither	Neither	Female	Female	Female	Neither	Neither	Neither
FBgn0010416	TH1	NO	0	0	5	0	5	NO	NO	NO	NO	NA	NO	4	Female	Female	Female	NA	NA	NA	Female	Female	Neither
FBgn0027279	l(1)G0196	NO	0	0	9	0	9	NO	NO	NO	NO	NA	NO	4	Female	Female	Female	Female	Female	Female	Female	Female	Female
FBgn0034269	Hyccin	YES	1	0	5	1	6	NO	NO	NO	NO	NA	NO	4	Female	Both	Female	Female	Female	Female	Neither	Neither	Neither
FBgn0266672	Sec8	NO	0	0	1	0	1	NO	NO	NO	NO	NA	NO	4	Neither	Neither	Neither	Neither	Neither	Neither	Neither	Neither	Female
FBgn0039640	superdeath	NO	0	0	3	0	3	NO	NO	NO	NO	NA	NO	4	Neither	Neither	Neither	Neither	Neither	Neither	Female	Female	Female
FBgn0052250	PMP34	NO	0	0	6	0	6	NO	NO	NO	NO	NA	NO	4	Female	Female	Female	Female	Female	Female	NA	NA	Neither
FBgn0038972	CG7054	YES	3	0	1	3	4	NO	NO	NO	NO	NA	NO	4	Both	Both	Both	NA	NA	NA	NA	NA	Female
FBgn0034223	Tes	YES	3	3	2	0	5	NO	NO	NO	NO	NA	NO	4	Female	Female	Neither	Male	Male	Male	Neither	Neither	NA
FBgn0265140	Meltrin	NO	0	0	1	0	1	NO	NO	NO	NO	NA	NO	4	Neither	Neither	NA	Neither	Neither	Neither	NA	Female	Neither
FBgn0035976	PGRP-LC	NO	0	0	6	0	6	NO	NO	NO	NO	NA	NO	4	Female	Female	Female	NA	NA	NA	Female	Female	Female
FBgn0017581	Lk6	YES	6	0	0	6	6	NO	NO	NO	NO	NA	NO	4	Both	Both	Both	Both	Both	Both	NA	NA	Neither
FBgn0032600	BuGZ	NO	0	0	7	0	7	NO	NO	NO	NO	NA	NO	4	Female	Female	Female	Female	Female	Female	Neither	Neither	Female
FBgn0030654	CG15643	NO	0	0	2	0	2	NO	NO	NO	NO	NA	NO	1	Neither	Neither	Neither	NA	NA	NA	Female	Female	NA
FBgn0001978	stc	YES	2	0	3	2	5	NO	NO	NO	NO	NA	NO	4	Neither	Neither	Neither	Both	Female	Both	Female	Female	Neither
FBgn0039427	CG5447	YES	1	0	3	1	4	NO	NO	NO	NO	NA	NO	4	Female	Both	Female	Neither	Neither	Neither	Neither	Neither	Female
FBgn0004606	zfh1	YES	3	1	2	2	5	NO	NO	NO	NO	NA	NO	1	Female	Both	NA	Male	Both	Neither	Female	NA	Neither
FBgn0262167	ana1	NO	0	0	2	0	2	NO	NO	NO	NO	NA	NO	4	Female	Neither	Female	NA	NA	NA	NA	NA	NA
FBgn0036684	CG3764	YES	1	0	1	1	2	NO	NO	NO	NO	NA	NO	4	NA	Neither	Neither	Female	Neither	Both	Neither	Neither	Neither
FBgn0284252	Letm1	NO	0	0	9	0	9	NO	NO	YES	NO	NA	NO	4	Female	Female	Female	Female	Female	Female	Female	Female	Female
FBgn0036386	CG8833	YES	3	0	3	3	6	NO	NO	NO	NO	NA	NO	2	Neither	Neither	Neither	Both	Both	Both	Female	Female	Female
FBgn0030321	CG1703	NO	0	0	1	0	1	NO	NO	NO	NO	NA	NO	4	NA	NA	NA	NA	NA	NA	Neither	Neither	Female
FBgn0039969	Fis1	NO	0	0	1	0	1	NO	NO	NO	NO	NA	NO	4	Neither	Neither	Neither	NA	NA	NA	Neither	Neither	Female
FBgn0028371	jbug	YES	6	0	3	6	9	NO	NO	YES	NO	NA	NO	4	Both	Both	Both	Both	Both	Both	Female	Female	Female
FBgn0086708	stv	NO	0	0	6	0	6	NO	NO	NO	NO	NA	NO	4	Female	Female	Female	Female	Female	Female	Neither	Neither	Neither
FBgn0051140	CG31140	NO	0	0	2	0	2	NO	NO	NO	NO	NA	NO	4	Neither	Female	Neither	Neither	Female	Neither	Neither	NA	NA
FBgn0038662	Mpc1	NO	0	0	1	0	1	NO	NO	YES	NO	NA	NO	4	Neither	Neither	Neither	Neither	Neither	Neither	Neither	Neither	Female
FBgn0035982	CG4461	NO	0	0	2	0	2	NO	NO	YES	NO	NA	NO	1	Female	Female	NA	NA	NA	NA	Neither	NA	NA
FBgn0013995	Calx	NO	0	0	1	0	1	NO	NO	YES	NO	NA	NO	4	Neither	Female	Neither	Neither	Neither	Neither	Neither	Neither	Neither
FBgn0032451	spict	YES	3	0	0	3	3	NO	NO	NO	NO	NA	NO	4	NA	NA	NA	Both	Both	Both	NA	NA	NA
FBgn0039557	CG12259	NO	0	0	4	0	4	NO	NO	NO	NO	NA	NO	2	Neither	Neither	Neither	Female	Female	Female	Neither	Neither	Female
FBgn0284253	LeuRS	NO	0	0	3	0	3	NO	NO	NO	NO	NA	NO	4	Neither	Neither	Neither	Neither	Neither	Neither	Female	Female	Female
FBgn0038130	CG8630	YES	1	0	0	1	1	NO	NO	NO	NO	NA	NO	1	Neither	Both	Neither	Neither	Neither	Neither	Neither	Neither	Neither
FBgn0285971	prg	NO	0	0	3	0	3	NO	NO	NO	NO	NA	NO	4	Neither	Neither	Neither	Neither	Neither	Neither	Female	Female	Female
FBgn0029685	CG2938	NO	0	0	1	0	1	NO	NO	NO	NO	NA	NO	4	NA	NA	NA	NA	NA	NA	Neither	Neither	Female
FBgn0016715	Reg-2	YES	4	2	4	2	8	NO	NO	NO	NO	NA	NO	3	Male	Male	Neither	Both	Female	Both	Female	Female	Female
FBgn0038136	CG8774	NO	0	0	2	0	2	NO	NO	NO	NO	NA	NO	1	NA	NA	NA	Neither	Female	Female	NA	NA	Neither
FBgn0033816	CG4679	YES	3	0	0	3	3	NO	NO	NO	NO	NA	NO	4	Both	Both	Both	Neither	Neither	Neither	Neither	Neither	Neither
FBgn0025678	CaBP1	NO	0	0	4	0	4	NO	NO	NO	NO	NA	NO	4	Female	Female	Female	Neither	Neither	Neither	Neither	Neither	Female
FBgn0031635	tank	YES	3	0	0	3	3	NO	NO	NO	NO	NA	NO	4	Both	Both	Both	Neither	Neither	Neither	Neither	Neither	Neither
FBgn0034049	bdg	NO	0	0	3	0	3	NO	NO	NO	NO	NA	NO	4	Female	Female	Female	Neither	Neither	Neither	Neither	Neither	Neither
FBgn0261862	whd	YES	3	0	3	3	6	NO	NO	NO	NO	NA	NO	4	Both	Both	Both	NA	NA	NA	Female	Female	Female
FBgn0033698	CG8858	NO	0	0	7	0	7	NO	NO	YES	NO	NA	NO	4	Female	Female	Female	Female	Female	Female	Female	Neither	Neither
FBgn0040207	kat80	NO	0	0	1	0	1	NO	NO	NO	NO	NA	NO	4	NA	NA	NA	NA	NA	NA	NA	NA	Female
FBgn0035983	CG4080	NO	0	0	6	0	6	NO	NO	NO	NO	NA	NO	4	Female	Female	Female	NA	NA	NA	Female	Female	Female
FBgn0033460	Sec24AB	NO	0	0	3	0	3	NO	NO	NO	NO	NA	NO	4	Neither	Neither	Neither	Female	Female	Female	NA	NA	Neither
FBgn0034999	Fatp3	YES	5	0	4	5	9	NO	NO	YES	NO	NA	NO	4	Both	Both	Female	Both	Both	Both	Female	Female	Female
FBgn0052062	Rbfox1	YES	1	1	0	0	1	NO	NO	NO	NO	SC	NO	4	Neither	Neither	Neither	Male	Neither	Neither	Neither	Neither	Neither
FBgn0038211	CG9649	YES	3	0	6	3	9	NO	NO	NO	NO	NA	NO	1	Female	Female	Female	Both	Both	Both	Female	Female	Female
FBgn0036335	mRpL20	NO	0	0	3	0	3	NO	NO	NO	NO	NA	NO	3	NA	NA	NA	Female	Female	Female	Neither	Neither	Neither
FBgn0037541	CG2747	NO	0	0	3	0	3	NO	NO	NO	NO	NA	NO	4	Neither	Neither	Neither	Female	Female	Female	Neither	Neither	Neither
FBgn0035397	PAN3	NO	0	0	2	0	2	NO	NO	NO	NO	NA	NO	4	Neither	Neither	Neither	Neither	Neither	Neither	Female	Female	Neither
FBgn0033225	TTLL12	YES	3	0	0	3	3	NO	NO	NO	NO	NA	NO	4	NA	NA	NA	Both	Both	Both	NA	NA	NA
FBgn0020503	CLIP-190	YES	5	0	4	5	9	NO	NO	NO	NO	NA	NO	4	Both	Both	Female	Both	Both	Both	Female	Female	Female
FBgn0034194	CG15611	NO	0	0	9	0	9	NO	NO	NO	NO	NA	NO	4	Female	Female	Female	Female	Female	Female	Female	Female	Female
FBgn0039858	CycG	NO	0	0	1	0	1	NO	NO	NO	NO	NA	NO	4	NA	NA	NA	Neither	Neither	Female	Neither	Neither	Neither
FBgn0000547	ed	NO	0	0	3	0	3	NO	NO	NO	NO	NA	NO	4	Neither	Neither	Neither	Female	Female	Female	Neither	Neither	Neither
FBgn0036862	Gbs-76A	NO	0	0	1	0	1	NO	NO	NO	NO	NA	NO	4	Neither	Neither	Neither	Neither	Neither	Neither	Female	NA	Neither
FBgn0031981	Megf8	YES	1	0	2	1	3	NO	NO	NO	NO	NA	NO	4	Neither	Female	NA	Neither	Both	Female	Neither	NA	Neither
FBgn0038868	CG5862	NO	0	0	3	0	3	NO	NO	NO	NO	NA	NO	4	Neither	Neither	Neither	Neither	Neither	Neither	Female	Female	Female
FBgn0003042	Pc	NO	0	0	1	0	1	NO	NO	NO	NO	NA	NO	4	Neither	Neither	Neither	NA	NA	NA	Female	Neither	Neither
FBgn0010382	CycE	NO	0	0	2	0	2	NO	NO	NO	NO	NA	NO	0	Neither	Neither	NA	Female	Female	Neither	NA	Neither	Neither
FBgn0034628	Acox57D-p	NO	0	0	1	0	1	NO	NO	NO	NO	NA	NO	4	Neither	Neither	NA	Neither	Neither	Neither	Neither	Neither	Female
FBgn0261574	kug	NO	0	0	1	0	1	NO	NO	NO	NO	NA	NO	4	Neither	NA	NA	Female	Neither	Neither	Neither	Neither	Neither
FBgn0037956	CG6959	NO	0	0	4	0	4	NO	NO	NO	NO	NA	NO	4	Female	Female	Female	Neither	Neither	Neither	Neither	Neither	Female
FBgn0031549	Spindly	YES	1	0	2	1	3	NO	NO	NO	NO	NA	NO	3	NA	Neither	NA	Both	Female	Female	Neither	NA	NA
FBgn0020647	KrT95D	NO	0	0	4	0	4	NO	NO	NO	NO	NA	NO	4	Neither	Neither	Neither	Female	Female	Female	Neither	Neither	Female
FBgn0036545	GXIVsPLA2	NO	0	0	3	0	3	NO	NO	NO	NO	NA	NO	4	NA	NA	NA	Female	Female	Female	Neither	Neither	Neither
FBgn0034727	mRpS29	YES	3	0	1	3	4	NO	NO	NO	NO	NA	NO	4	Both	Both	Both	NA	NA	NA	NA	NA	Female
FBgn0033673	CG8298	NO	0	0	4	0	4	NO	NO	NO	NO	NA	NO	4	NA	NA	NA	Female	Female	Female	Female	Neither	Neither
FBgn0050421	Usp15-31	NO	0	0	3	0	3	NO	NO	NO	NO	NA	NO	4	Female	Female	Neither	Neither	Neither	Neither	Neither	Neither	Female
FBgn0085433	CG34404	NO	0	0	1	0	1	NO	NO	NO	NO	NA	NO	4	Female	Neither	Neither	NA	NA	NA	NA	NA	Neither
FBgn0001089	Gal	NO	0	0	1	0	1	NO	NO	NO	NO	NA	NO	0	Neither	Neither	Neither	Neither	Neither	Neither	Female	Neither	Neither
FBgn0026573	ADD1	NO	0	0	3	0	3	NO	NO	NO	NO	NA	NO	4	NA	NA	NA	Female	Female	Female	Neither	Neither	Neither
FBgn0034419	CG15111	NO	0	0	3	0	3	NO	NO	NO	NO	NA	NO	4	Female	Female	Female	Neither	Neither	Neither	Neither	Neither	Neither
FBgn0003862	trx	YES	3	0	6	3	9	YES	NO	NO	NO	NA	NO	4	Female	Female	Female	Both	Both	Both	Female	Female	Female
FBgn0283681	Tcs3	YES	3	0	1	3	4	NO	NO	NO	NO	NA	NO	3	Neither	Neither	Neither	Both	Both	Both	Neither	Neither	Female
FBgn0035805	CG7506	NO	0	0	2	0	2	NO	NO	NO	NO	NA	NO	4	Neither	Neither	Neither	Neither	Neither	Neither	Female	Female	Neither
FBgn0085475	CG34446	NO	0	0	1	0	1	NO	NO	NO	NO	NA	NO	4	Neither	Neither	Neither	Neither	Neither	Neither	Neither	Neither	Female
FBgn0037989	ATP8B	NO	0	0	3	0	3	NO	NO	NO	NO	NA	NO	4	Neither	Neither	Neither	Female	Female	Female	Neither	Neither	NA
FBgn0039113	udt	NO	0	0	6	0	6	NO	NO	NO	NO	NA	NO	4	NA	NA	NA	Female	Female	Female	Female	Female	Female
FBgn0033518	Prx2540-2	NO	0	0	2	0	2	NO	NO	NO	NO	NA	NO	4	Female	Female	Neither	NA	NA	NA	NA	NA	NA
FBgn0010894	sinu	YES	3	0	2	3	5	NO	NO	NO	NO	NA	NO	4	Both	Both	Both	Neither	Neither	Neither	Female	Female	NA
FBgn0261545	CG42663	NO	0	0	9	0	9	NO	NO	NO	NO	NA	NO	4	Female	Female	Female	Female	Female	Female	Female	Female	Female
FBgn0020304	drongo	NO	0	0	5	0	5	NO	NO	NO	NO	NA	NO	4	Female	Female	Female	Neither	Neither	Neither	Female	Female	Neither
FBgn0036814	CG14073	YES	3	0	4	3	7	NO	NO	NO	NO	NA	NO	4	Female	Female	Neither	Both	Both	Both	Female	Female	Neither
FBgn0040658	CG13516	NO	0	0	5	0	5	NO	NO	NO	NO	NA	NO	4	Female	Female	Female	Neither	Female	Female	Neither	Neither	Neither
FBgn0034009	CG8155	YES	2	0	0	2	2	NO	NO	NO	NO	NA	NO	4	Both	Both	Neither	Neither	Neither	Neither	Neither	Neither	Neither
FBgn0263120	Acsl	NO	0	0	4	0	4	NO	NO	YES	NO	NA	NO	4	Neither	Neither	Neither	Female	Female	Female	Neither	Neither	Female
FBgn0031893	MICU1	YES	3	0	5	3	8	NO	NO	NO	NO	NA	NO	4	Both	Both	Both	Female	Female	Female	Female	Female	NA
FBgn0029114	Tollo	NO	0	0	2	0	2	NO	NO	NO	NO	NA	NO	4	NA	Female	NA	NA	Female	NA	Neither	NA	NA
FBgn0027508	Tnks	NO	0	0	2	0	2	NO	NO	NO	NO	NA	NO	4	Female	Female	Neither	NA	NA	NA	Neither	Neither	Neither
FBgn0034295	CG10911	YES	3	0	1	3	4	NO	NO	NO	NO	NA	NO	0	Neither	Female	Neither	Both	Both	Both	NA	NA	NA
FBgn0033339	Sec31	NO	0	0	6	0	6	NO	NO	NO	NO	NA	NO	4	Female	Female	Female	Female	Female	Female	NA	NA	Neither
FBgn0004858	elB	YES	1	0	5	1	6	NO	NO	NO	NO	NA	NO	4	Neither	Neither	Neither	Female	Female	Both	Female	Female	Female
FBgn0024689	fws	NO	0	0	1	0	1	NO	NO	NO	NO	NA	NO	4	Neither	Neither	Neither	Neither	Neither	Neither	Neither	Neither	Female
FBgn0035390	scramb2	YES	3	0	2	3	5	NO	YES	NO	NO	NA	YES	4	Neither	Neither	Neither	Both	Both	Both	Female	Female	Neither
FBgn0010309	pigeon	NO	0	0	5	0	5	NO	NO	NO	NO	NA	NO	4	Female	Female	Female	Neither	Neither	Neither	Female	Female	Neither
FBgn0085444	mute	NO	0	0	4	0	4	NO	NO	NO	NO	NA	NO	4	Female	Female	Female	Neither	Neither	Neither	Neither	Neither	Female
FBgn0033929	Tfb1	NO	0	0	6	0	6	NO	NO	NO	NO	NA	NO	4	Female	Female	Female	Neither	Neither	Neither	Female	Female	Female
FBgn0036398	upSET	YES	3	0	0	3	3	NO	NO	NO	NO	NA	NO	4	Neither	Neither	Neither	Both	Both	Both	Neither	Neither	NA
FBgn0038476	kuk	YES	3	0	2	3	5	NO	NO	NO	NO	NA	NO	4	Neither	Neither	Neither	Both	Both	Both	Female	Female	Neither
FBgn0027932	Akap200	YES	3	0	3	3	6	NO	NO	YES	NO	NA	NO	4	Neither	Neither	Neither	Both	Both	Both	Female	Female	Female
FBgn0040323	GNBP1	YES	3	0	1	3	4	NO	NO	NO	NO	NA	NO	4	Both	Both	Both	Neither	Neither	Neither	Neither	NA	Female
FBgn0042111	CG18766	NO	0	0	9	0	9	NO	NO	NO	NO	NA	NO	4	Female	Female	Female	Female	Female	Female	Female	Female	Female
FBgn0016070	smg	NO	0	0	9	0	9	NO	NO	NO	NO	NA	NO	4	Female	Female	Female	Female	Female	Female	Female	Female	Female
FBgn0036262	CG6910	NO	0	0	8	0	8	NO	NO	NO	NO	NA	NO	4	Female	Female	Neither	Female	Female	Female	Female	Female	Female
FBgn0052834	CG32834	NO	0	0	6	0	6	NO	NO	NO	NO	NA	NO	0	Female	Female	Female	Neither	Neither	Neither	Female	Female	Female
FBgn0265991	Zasp52	YES	1	0	3	1	4	NO	NO	NO	NO	SC	YES	4	Female	Both	Female	Neither	Neither	Neither	Neither	Neither	Female
FBgn0259481	Mob2	YES	2	1	0	1	2	NO	NO	NO	NO	NA	NO	4	Neither	Neither	Neither	Neither	Male	Both	Neither	Neither	Neither
FBgn0003386	Shaw	NO	0	0	1	0	1	NO	NO	NO	NO	NA	NO	0	NA	Female	NA	NA	Neither	Neither	Neither	NA	NA
FBgn0034379	CG15073	NO	0	0	2	0	2	NO	NO	NO	NO	NA	NO	2	Neither	Neither	Neither	Neither	Neither	Neither	Female	Female	Neither
FBgn0037016	CG13252	NO	0	0	8	0	8	NO	NO	NO	NO	NA	NO	4	Female	Female	Female	Female	Female	Female	Female	Female	Neither
FBgn0016076	vri	NO	0	0	6	0	6	NO	NO	NO	NO	NA	NO	4	Female	Female	Female	Neither	Neither	Neither	Female	Female	Female
FBgn0027094	AlaRS	YES	3	0	3	3	6	NO	NO	NO	NO	NA	NO	4	Neither	Neither	Neither	Both	Both	Both	Female	Female	Female
FBgn0051100	CG31100	NO	0	0	3	0	3	NO	NO	NO	NO	NA	NO	4	Neither	Female	Female	Neither	Neither	Neither	Neither	Neither	Female
FBgn0032646	mEFTs	YES	3	0	1	3	4	NO	NO	NO	NO	NA	NO	4	Both	Both	Both	Neither	Neither	Neither	Neither	Neither	Female
FBgn0284247	ds	NO	0	0	4	0	4	NO	NO	NO	NO	NA	NO	0	Neither	Female	Neither	NA	Female	Female	Female	NA	Neither
FBgn0040322	GNBP2	YES	2	0	2	2	4	NO	NO	NO	NO	NA	NO	3	Both	Both	Female	Neither	Neither	Neither	Neither	Neither	Female
FBgn0286898	Tango1	NO	0	0	6	0	6	NO	NO	NO	NO	NA	NO	4	Neither	Neither	Neither	Female	Female	Female	Female	Female	Female
FBgn0039543	CROT	NO	0	0	4	0	4	NO	NO	NO	NO	NA	NO	4	NA	NA	NA	Female	Female	Female	Neither	Neither	Female
FBgn0065110	ppk10	NO	0	0	1	0	1	NO	NO	NO	NO	NA	NO	1	NA	NA	Neither	NA	NA	Female	NA	Neither	NA
FBgn0035435	PIG-C	NO	0	0	6	0	6	NO	NO	NO	NO	NA	NO	1	Female	Female	Female	Female	Female	Female	Neither	Neither	Neither
FBgn0261387	CG17528	YES	4	2	0	2	4	NO	NO	NO	NO	NA	NO	4	Both	Both	Neither	Neither	Male	Male	Neither	Neither	NA
FBgn0042627	FASN2	NO	0	0	1	0	1	NO	NO	YES	NO	NA	NO	1	Neither	Neither	Neither	Neither	NA	NA	NA	NA	Female
FBgn0259896	NimC1	NO	0	0	4	0	4	NO	NO	NO	NO	NA	NO	0	Neither	Female	NA	Female	Female	Neither	Female	Neither	Neither
FBgn0035473	mge	NO	0	0	2	0	2	NO	NO	YES	NO	NA	NO	4	Neither	Neither	Neither	Neither	Neither	Neither	Female	Female	Neither
FBgn0015903	apt	NO	0	0	2	0	2	NO	NO	NO	NO	NA	NO	4	Neither	Neither	Neither	Neither	Neither	Neither	Female	Female	Neither
FBgn0032640	Sgt	NO	0	0	1	0	1	NO	NO	NO	NO	NA	NO	4	Neither	Neither	Neither	Neither	Neither	Neither	Neither	Neither	Female
FBgn0034346	PIG-O	YES	3	0	4	3	7	NO	NO	NO	NO	NA	NO	4	Both	Both	Both	Female	Female	Female	Neither	Neither	Female
FBgn0285896	btl	NO	0	0	3	0	3	NO	NO	NO	NO	NA	NO	4	NA	Female	Female	Neither	Female	Neither	Neither	Neither	Neither
FBgn0034644	CG10082	NO	0	0	2	0	2	NO	NO	NO	NO	SC	NO	4	Neither	Neither	Neither	Neither	Neither	Neither	Female	Female	Neither
FBgn0031764	CG9107	YES	1	1	0	0	1	NO	NO	NO	NO	NA	NO	1	Neither	Male	Neither	NA	NA	NA	Neither	Neither	Neither
FBgn0028394	CG17834	NO	0	0	9	0	9	NO	NO	NO	NO	NA	NO	4	Female	Female	Female	Female	Female	Female	Female	Female	Female
FBgn0037934	CG6830	YES	4	0	5	4	9	NO	NO	NO	NO	NA	NO	4	Both	Female	Both	Both	Female	Both	Female	Female	Female
FBgn0031030	Tao	NO	0	0	1	0	1	NO	NO	NO	NO	NA	NO	4	NA	NA	NA	NA	NA	NA	NA	NA	Female
FBgn0000422	Ddc	YES	2	0	0	2	2	NO	NO	NO	NO	NA	NO	4	Neither	Neither	Neither	Neither	Both	Both	Neither	Neither	Neither
FBgn0010052	Jhe	YES	2	0	1	2	3	NO	NO	NO	NO	NA	NO	4	Both	Female	Both	Neither	Neither	Neither	Neither	Neither	Neither
FBgn0265276	l(3)neo38	YES	2	2	3	0	5	NO	NO	NO	NO	NA	NO	4	Neither	Male	Neither	Male	Neither	Neither	Female	Female	Female
FBgn0005612	Sox14	NO	0	0	1	0	1	NO	NO	NO	NO	NA	NO	4	Neither	Neither	Neither	Neither	Neither	Neither	Neither	Neither	Female
FBgn0034160	CG5550	NO	0	0	2	0	2	NO	NO	NO	NO	NA	NO	0	NA	NA	NA	Neither	Female	Female	Neither	NA	NA
FBgn0039600	Prp39	YES	3	0	2	3	5	NO	NO	NO	NO	NA	NO	4	Neither	Neither	Neither	Both	Both	Both	Female	Female	Neither
FBgn0287831	speck	NO	0	0	6	0	6	NO	NO	NO	NO	NA	NO	4	Female	Female	Female	Female	Female	Female	Neither	Neither	Neither
FBgn0000116	Argk	NO	0	0	1	0	1	NO	NO	YES	NO	NA	NO	4	Neither	Neither	Neither	NA	NA	NA	Neither	Neither	Female
FBgn0267351	Topors	YES	2	2	0	0	2	NO	NO	NO	NO	NA	NO	4	Male	Male	Neither	Neither	Neither	Neither	Neither	Neither	Neither
FBgn0051038	CG31038	NO	0	0	2	0	2	NO	NO	NO	NO	NA	NO	4	Neither	Neither	Neither	Neither	Neither	Neither	Female	Female	Neither
FBgn0036043	Ae2	YES	2	2	2	0	4	NO	NO	NO	NO	EDC	NO	4	NA	Neither	Neither	Neither	Male	Male	Female	Female	Neither
FBgn0039451	CG6420	NO	0	0	3	0	3	NO	NO	NO	NO	NA	NO	4	Neither	Neither	Neither	Female	Female	Female	Neither	Neither	Neither
FBgn0262160	CG9932	YES	6	0	3	6	9	NO	NO	NO	NO	NA	NO	4	Both	Both	Female	Both	Both	Both	Both	Female	Female
FBgn0011589	Elk	NO	0	0	1	0	1	NO	NO	NO	NO	NA	NO	0	NA	Neither	NA	NA	Neither	NA	NA	NA	Female
FBgn0262166	calypso	NO	0	0	4	0	4	NO	NO	NO	NO	NA	NO	2	Female	Female	Female	Neither	Neither	Neither	Neither	Neither	Female
FBgn0263490	mld	NO	0	0	2	0	2	NO	NO	NO	NO	MC	YES	4	Female	Female	Neither	NA	NA	NA	Neither	NA	Neither
FBgn0034307	CG10914	YES	2	0	0	2	2	NO	NO	NO	NO	NA	NO	1	Both	Both	Neither	Neither	Neither	Neither	Neither	Neither	Neither
FBgn0030528	CG11095	NO	0	0	1	0	1	NO	NO	NO	NO	NA	NO	2	NA	NA	NA	NA	NA	NA	NA	NA	Female
FBgn0035780	CG18417	NO	0	0	6	0	6	NO	NO	NO	NO	NA	NO	0	Female	Female	Female	Female	Female	Female	Neither	NA	NA
FBgn0033214	CG1941	NO	0	0	2	0	2	NO	NO	NO	NO	NA	NO	1	Neither	Neither	Neither	Neither	Neither	Neither	Female	Female	Neither
FBgn0033978	Cyp6a23	NO	0	0	1	0	1	NO	NO	NO	NO	NA	NO	4	NA	NA	NA	Neither	Neither	Neither	Female	Neither	Neither
FBgn0085453	Mthfs	YES	3	0	0	3	3	NO	NO	YES	NO	NA	NO	2	Neither	Neither	Neither	Both	Both	Both	Neither	Neither	Neither
FBgn0002719	Men	NO	0	0	1	0	1	NO	NO	YES	NO	NA	NO	4	Neither	Neither	Neither	Neither	Neither	Neither	Female	Neither	Neither
FBgn0045862	btz	NO	0	0	6	0	6	NO	NO	NO	NO	NA	NO	4	NA	NA	NA	Female	Female	Female	Female	Female	Female
FBgn0031115	CG11710	NO	0	0	1	0	1	NO	NO	NO	NO	NA	NO	4	NA	NA	NA	NA	NA	NA	NA	NA	Female
FBgn0053970	osy	NO	0	0	3	0	3	NO	NO	NO	NO	NA	NO	4	Neither	Neither	Neither	Female	Female	Female	Neither	Neither	Neither
FBgn0037936	CG6908	NO	0	0	3	0	3	NO	NO	NO	NO	NA	NO	3	Female	Female	Neither	Female	Neither	Neither	Neither	Neither	Neither
FBgn0031497	SerRS	YES	3	0	1	3	4	NO	NO	NO	NO	NA	NO	4	Both	Both	Both	Neither	Neither	Neither	Neither	Neither	Female
FBgn0265784	CrebB	NO	0	0	1	0	1	NO	NO	NO	NO	NA	NO	4	NA	NA	NA	NA	NA	NA	Neither	Neither	Female
FBgn0035249	CG17249	YES	3	3	0	0	3	NO	NO	NO	NO	NA	NO	2	Neither	Neither	Neither	Male	Male	Male	Neither	Neither	Neither
FBgn0035612	frm	NO	0	0	2	0	2	NO	NO	NO	NO	NA	NO	1	Neither	Female	Female	NA	NA	NA	Neither	NA	NA
FBgn0030915	CG6179	NO	0	0	1	0	1	NO	NO	NO	NO	NA	NO	2	NA	NA	NA	NA	NA	NA	NA	NA	Female
FBgn0037203	slif	NO	0	0	2	0	2	NO	NO	NO	NO	NA	NO	4	Neither	Neither	Neither	NA	NA	NA	Female	Female	Neither
FBgn0032346	Csl4	NO	0	0	1	0	1	NO	NO	NO	NO	NA	NO	1	Female	Neither	Neither	Neither	Neither	Neither	Neither	Neither	Neither
FBgn0031760	Tsp26A	NO	0	0	7	0	7	NO	NO	NO	NO	NA	NO	4	Female	Female	Neither	Female	Female	Female	Female	Female	Neither
FBgn0033413	prel	YES	3	0	1	3	4	NO	NO	NO	NO	NA	NO	4	Neither	Neither	Neither	Both	Both	Both	Neither	Neither	Female
FBgn0026079	Nsun2	YES	3	3	2	0	5	NO	NO	NO	NO	NA	NO	4	NA	NA	NA	Male	Male	Male	Female	Female	Neither
FBgn0034646	Rae1	YES	3	0	2	3	5	NO	NO	NO	NO	NA	NO	4	Both	Both	Both	NA	NA	NA	Female	Female	NA
FBgn0083969	CG34133	YES	3	0	3	3	6	NO	NO	NO	NO	NA	NO	4	Both	Both	Both	Female	Female	Female	Neither	Neither	Neither
FBgn0039223	CG5805	YES	3	0	0	3	3	NO	NO	NO	NO	NA	NO	4	Both	Both	Both	NA	NA	NA	Neither	Neither	Neither
FBgn0086895	pea	YES	1	0	3	1	4	NO	NO	NO	NO	NA	NO	4	Neither	Neither	Neither	Both	Female	Female	Neither	Neither	Female
FBgn0261119	Prp19	YES	3	0	0	3	3	NO	NO	NO	NO	NA	NO	4	Both	Both	Both	Neither	Neither	Neither	NA	NA	Neither
FBgn0039801	Npc2h	NO	0	0	4	0	4	NO	NO	NO	NO	NA	NO	4	Female	Female	Female	Neither	Neither	Neither	Neither	Neither	Female
FBgn0004644	hh	NO	0	0	2	0	2	NO	NO	NO	NO	NA	NO	4	NA	Neither	Neither	NA	Neither	Neither	Female	Female	Neither
FBgn0038286	CG6966	NO	0	0	1	0	1	NO	NO	NO	NO	NA	NO	4	Neither	Neither	Neither	Neither	Neither	Neither	Neither	Neither	Female
FBgn0032822	CG10466	YES	3	3	1	0	4	NO	NO	NO	NO	NA	NO	2	Male	Male	Male	NA	NA	NA	Neither	Neither	Female
FBgn0250788	beta-Spec	NO	0	0	2	0	2	NO	NO	YES	NO	NA	NO	4	Neither	Neither	Neither	Neither	Neither	Neither	Female	Female	Neither
FBgn0038597	CG8064	NO	0	0	1	0	1	NO	NO	NO	NO	NA	NO	4	Neither	Neither	Neither	Neither	Neither	Neither	Neither	Neither	Female
FBgn0001108	DCTN1-p150	YES	3	0	3	3	6	NO	NO	NO	NO	NA	NO	4	Neither	Neither	Neither	Both	Both	Both	Female	Female	Female
FBgn0043578	PGRP-SB1	NO	0	0	2	0	2	NO	NO	NO	NO	NA	NO	0	NA	NA	NA	NA	NA	NA	Female	Female	Neither
FBgn0044452	Atg2	YES	3	0	6	3	9	NO	NO	NO	NO	NA	NO	4	Female	Female	Female	Both	Both	Both	Female	Female	Female
FBgn0035696	Best2	NO	0	0	7	0	7	NO	NO	NO	NO	MC	YES	4	Female	Female	Female	Female	Female	Female	Neither	Neither	Female
FBgn0036549	CG10516	YES	3	1	5	2	8	NO	NO	NO	NO	NA	NO	4	Female	Female	Female	Both	Male	Both	Female	Female	NA
FBgn0285913	red	NO	0	0	1	0	1	NO	NO	NO	NO	NA	NO	4	Neither	Neither	Neither	Neither	Neither	Neither	Neither	Neither	Female
FBgn0030808	RhoGAP15B	NO	0	0	7	0	7	NO	NO	NO	NO	NA	NO	4	Female	Female	Female	Neither	Female	Female	Female	Female	Neither
FBgn0026309	aft	YES	3	0	0	3	3	NO	NO	NO	NO	NA	NO	4	Both	Both	Both	Neither	Neither	Neither	Neither	Neither	Neither
FBgn0035283	CG12024	YES	2	0	1	2	3	NO	NO	NO	NO	NA	NO	4	Both	Both	Female	Neither	Neither	Neither	Neither	Neither	NA
FBgn0038692	Polr2M	NO	0	0	7	0	7	NO	NO	NO	NO	NA	NO	3	Female	Female	Female	Female	Female	Female	Neither	Neither	Female
FBgn0053514	CG33514	NO	0	0	4	0	4	NO	NO	NO	NO	NA	NO	1	Neither	Neither	NA	Female	Female	Female	NA	NA	Female
FBgn0085446	CG34417	NO	0	0	3	0	3	NO	NO	YES	NO	NA	NO	4	NA	NA	NA	NA	NA	NA	Female	Female	Female
FBgn0035690	CG10274	YES	3	3	0	0	3	NO	NO	NO	NO	NA	NO	4	Neither	Neither	Neither	Male	Male	Male	Neither	Neither	Neither
FBgn0020306	dom	YES	2	0	1	2	3	NO	NO	NO	NO	NA	NO	4	Neither	Neither	Neither	Both	Neither	Both	Neither	Female	Neither
FBgn0031611	FIG4	NO	0	0	6	0	6	NO	NO	NO	NO	NA	NO	3	Female	Female	Female	NA	NA	NA	Female	Female	Female
FBgn0051739	AspRS-m	NO	0	0	8	0	8	NO	NO	NO	NO	NA	NO	4	Female	Female	Female	Female	Female	Female	Female	Neither	Female
FBgn0267348	LanB2	NO	0	0	6	0	6	NO	NO	YES	NO	NA	NO	4	Female	Female	Female	Neither	Neither	Neither	Female	Female	Female
FBgn0263929	jvl	NO	0	0	9	0	9	NO	NO	NO	NO	NA	NO	4	Female	Female	Female	Female	Female	Female	Female	Female	Female
FBgn0003292	rt	YES	2	2	0	0	2	NO	NO	NO	NO	NA	NO	0	NA	NA	NA	Male	Male	Neither	NA	NA	NA
FBgn0020300	geko	NO	0	0	2	0	2	NO	NO	NO	NO	NA	NO	4	Neither	Neither	Neither	Neither	Neither	Neither	Female	Female	Neither
FBgn0032018	CG7806	NO	0	0	9	0	9	NO	NO	NO	NO	NA	NO	4	Female	Female	Female	Female	Female	Female	Female	Female	Female
FBgn0036816	Indy	YES	3	0	0	3	3	NO	NO	NO	NO	NA	NO	4	Neither	Neither	Neither	Both	Both	Both	Neither	Neither	Neither
FBgn0035578	CG13707	YES	1	0	2	1	3	NO	NO	NO	NO	NA	NO	4	Female	Both	Female	Neither	Neither	Neither	Neither	NA	Neither
FBgn0039431	plum	NO	0	0	1	0	1	NO	NO	NO	NO	NA	NO	4	Neither	Neither	NA	Female	Neither	Neither	Neither	Neither	NA
FBgn0021967	ND-PDSW	NO	0	0	3	0	3	NO	NO	YES	NO	NA	NO	4	Neither	Neither	Neither	Neither	Neither	Neither	Female	Female	Female
FBgn0038564	CG7785	NO	0	0	2	0	2	NO	NO	NO	NO	NA	NO	4	Female	Female	Neither	Neither	Neither	Neither	Neither	Neither	Neither
FBgn0011300	babo	NO	0	0	4	0	4	NO	NO	NO	NO	NA	NO	4	Neither	Neither	Neither	Female	Female	Female	NA	NA	Female
FBgn0013307	Odc1	NO	0	0	4	0	4	NO	NO	NO	NO	NA	NO	1	Neither	Neither	Neither	Female	Female	Female	Neither	Neither	Female
FBgn0032408	CG6712	NO	0	0	2	0	2	NO	NO	NO	NO	NA	NO	3	Neither	Neither	Neither	Neither	Neither	Neither	Female	Female	Neither
FBgn0039751	CG1983	YES	3	3	2	0	5	NO	NO	NO	NO	NA	NO	4	Neither	Female	Female	Male	Male	Male	Neither	Neither	Neither
FBgn0030927	CG15046	NO	0	0	1	0	1	NO	NO	NO	NO	NA	NO	1	NA	NA	NA	NA	NA	NA	Female	Neither	Neither
FBgn0037843	CG4511	NO	0	0	1	0	1	NO	NO	NO	NO	NA	NO	4	Neither	Neither	Neither	Neither	Neither	Neither	Neither	Neither	Female
FBgn0051694	Ifrd1	NO	0	0	4	0	4	NO	NO	NO	NO	NA	NO	4	Female	Female	Female	Neither	Neither	Neither	Neither	Neither	Female
FBgn0031814	retm	NO	0	0	2	0	2	NO	NO	NO	NO	NA	NO	4	Neither	Neither	Neither	Neither	Neither	Neither	Female	Female	Neither
FBgn0266464	Nsf2	NO	0	0	2	0	2	NO	NO	YES	NO	NA	NO	4	Neither	Neither	Neither	Neither	Neither	Neither	Female	Female	Neither
FBgn0039241	CG11089	NO	0	0	6	0	6	NO	NO	NO	NO	NA	NO	4	Female	Female	Female	NA	NA	NA	Female	Female	Female
FBgn0031992	Acbp1	NO	0	0	1	0	1	NO	NO	NO	NO	NA	NO	4	Neither	Neither	Neither	Neither	Neither	Neither	Neither	Neither	Female
FBgn0261797	Dhc64C	NO	0	0	9	0	9	NO	NO	YES	NO	NA	NO	4	Female	Female	Female	Female	Female	Female	Female	Female	Female
FBgn0036460	CG5114	YES	3	0	0	3	3	NO	NO	NO	NO	NA	NO	4	Both	Both	Both	Neither	Neither	Neither	Neither	Neither	NA
FBgn0050395	CG30395	YES	1	1	0	0	1	YES	NO	NO	NO	MC	NO	0	NA	NA	NA	Male	NA	NA	NA	NA	NA
FBgn0015221	Fer2LCH	YES	3	3	0	0	3	NO	NO	YES	NO	NA	NO	4	Neither	Neither	Neither	Male	Male	Male	Neither	Neither	Neither
FBgn0025571	SF1	NO	0	0	8	0	8	NO	NO	NO	NO	NA	NO	4	Female	Female	Female	Female	Female	Female	Female	Neither	Female
FBgn0015803	RtGEF	NO	0	0	1	0	1	NO	NO	NO	NO	NA	NO	4	NA	NA	NA	NA	NA	NA	NA	NA	Female
FBgn0034091	mrj	YES	3	0	6	3	9	NO	NO	NO	NO	NA	NO	4	Both	Both	Both	Female	Female	Female	Female	Female	Female
FBgn0038588	CG7156	NO	0	0	9	0	9	NO	NO	NO	NO	NA	NO	4	Female	Female	Female	Female	Female	Female	Female	Female	Female
FBgn0027515	CG7115	NO	0	0	5	0	5	NO	NO	NO	NO	NA	NO	4	Female	Female	Female	Neither	Neither	Neither	Female	Female	Neither
FBgn0028473	Non1	YES	3	0	6	3	9	NO	NO	NO	NO	NA	NO	4	Both	Both	Both	Female	Female	Female	Female	Female	Female
FBgn0034938	CG3803	NO	0	0	5	0	5	NO	NO	NO	NO	NA	NO	4	Female	Female	Female	Neither	Neither	Neither	Female	Female	Neither
FBgn0014033	Sr-CI	NO	0	0	2	0	2	NO	NO	NO	NO	NA	NO	0	Neither	Neither	Neither	Neither	Neither	Neither	Female	Female	Neither
FBgn0038360	CG9590	NO	0	0	3	0	3	NO	NO	NO	NO	NA	NO	4	Female	Female	Female	Neither	Neither	Neither	Neither	Neither	Neither
FBgn0034110	Atg9	NO	0	0	3	0	3	NO	NO	NO	NO	NA	NO	4	Female	Female	Female	Neither	Neither	Neither	Neither	Neither	Neither
FBgn0037301	Mms19	NO	0	0	3	0	3	NO	NO	YES	NO	NA	NO	4	Female	Female	Female	NA	NA	NA	Neither	Neither	Neither
FBgn0040236	c11.1	NO	0	0	3	0	3	NO	NO	NO	NO	NA	NO	4	NA	NA	NA	NA	NA	NA	Female	Female	Female
FBgn0263391	hts	NO	0	0	2	0	2	NO	NO	YES	NO	NA	NO	4	Female	Female	Neither	Neither	Neither	Neither	Neither	Neither	Neither
FBgn0034422	CG7137	YES	3	0	3	3	6	NO	NO	NO	NO	NA	NO	4	Both	Both	Both	Female	Female	Female	Neither	Neither	Neither
FBgn0040230	dbo	NO	0	0	2	0	2	NO	NO	NO	NO	NA	NO	4	Female	Female	Neither	Neither	Neither	Neither	Neither	Neither	Neither
FBgn0035718	CG14820	NO	0	0	1	0	1	NO	NO	NO	NO	NA	NO	0	NA	NA	NA	NA	Neither	Neither	NA	NA	Female
FBgn0264357	SNF4Agamma	YES	6	0	3	6	9	NO	NO	NO	NO	NA	NO	4	Both	Both	Both	Both	Both	Both	Female	Female	Female
FBgn0041588	eIF2D	NO	0	0	3	0	3	NO	NO	NO	NO	NA	NO	4	Neither	Neither	Neither	Neither	Neither	Neither	Female	Female	Female
FBgn0024194	rasp	YES	3	0	0	3	3	NO	NO	NO	NO	NA	NO	4	Both	Both	Both	Neither	Neither	Neither	Neither	Neither	Neither
FBgn0030503	Tango2	NO	0	0	3	0	3	NO	NO	NO	NO	NA	NO	3	Female	Female	Female	Neither	Neither	Neither	Neither	Neither	Neither
FBgn0014075	Uggt	NO	0	0	9	0	9	NO	NO	YES	NO	NA	NO	4	Female	Female	Female	Female	Female	Female	Female	Female	Female
FBgn0024222	IKKbeta	NO	0	0	1	0	1	NO	NO	NO	NO	NA	NO	4	Neither	Neither	Neither	Neither	Neither	Neither	Neither	Neither	Female
FBgn0039215	CG6695	NO	0	0	3	0	3	NO	NO	NO	NO	NA	NO	4	Neither	Neither	Neither	Female	Female	Female	Neither	Neither	Neither
FBgn0086356	tum	NO	0	0	3	0	3	NO	NO	NO	NO	NA	NO	0	NA	NA	NA	Female	Female	Female	Neither	NA	Neither
FBgn0035150	Rev1	YES	3	3	6	0	9	NO	NO	NO	NO	NA	NO	3	Male	Male	Male	Female	Female	Female	Female	Female	Female
FBgn0003391	shg	YES	2	0	4	2	6	NO	NO	NO	NO	NA	NO	4	Both	Both	Female	NA	NA	NA	Female	Female	Female
FBgn0038277	RpS5b	NO	0	0	1	0	1	NO	NO	NO	NO	NA	NO	0	NA	NA	NA	NA	NA	NA	Neither	Neither	Female
FBgn0261793	Trf2	NO	0	0	1	0	1	NO	NO	NO	NO	NA	NO	4	NA	NA	NA	NA	NA	NA	Neither	Neither	Female
FBgn0030607	dob	NO	0	0	2	0	2	NO	NO	NO	NO	NA	NO	0	Female	Female	Neither	NA	NA	NA	Neither	Neither	Neither
FBgn0034602	Lapsyn	NO	0	0	9	0	9	NO	NO	NO	NO	NA	NO	4	Female	Female	Female	Female	Female	Female	Female	Female	Female
FBgn0034438	CG9416	YES	3	0	3	3	6	NO	NO	NO	NO	NA	NO	4	Both	Both	Both	Neither	Neither	Neither	Female	Female	Female
FBgn0036165	chrb	NO	0	0	3	0	3	NO	NO	NO	NO	NA	NO	4	Neither	Neither	Neither	Neither	Neither	Neither	Female	Female	Female
FBgn0035590	Tcs5	YES	3	0	4	3	7	NO	NO	NO	NO	NA	NO	2	Female	Female	Female	Both	Both	Both	Neither	Neither	Female
FBgn0035955	CG5194	NO	0	0	3	0	3	NO	NO	NO	NO	NA	NO	0	NA	NA	NA	Female	Female	Female	Neither	NA	Neither
FBgn0283525	l(2)10685	NO	0	0	4	0	4	NO	NO	NO	NO	NA	NO	0	Neither	Neither	Neither	Female	Female	Female	Neither	Neither	Female
FBgn0003890	betaTub97EF	YES	3	0	3	3	6	NO	NO	YES	NO	NA	NO	4	Both	Both	Both	Female	Female	Female	Neither	Neither	Neither
FBgn0027453	Dnz1	NO	0	0	2	0	2	NO	NO	NO	NO	NA	NO	3	Neither	Neither	Neither	Neither	Neither	Neither	Female	Female	Neither
FBgn0025874	Meics	YES	3	0	5	3	8	NO	NO	NO	NO	NA	NO	3	Both	Both	Both	Female	Female	Female	Female	Female	Neither
FBgn0002441	l(3)mbt	NO	0	0	3	0	3	NO	NO	YES	NO	NA	NO	4	Neither	Neither	Neither	Female	Female	Female	Neither	Neither	Neither
FBgn0261710	nocte	YES	3	0	1	3	4	NO	NO	NO	NO	NA	NO	4	NA	NA	NA	Both	Both	Both	NA	NA	Female
FBgn0031645	CG3036	YES	3	0	6	3	9	NO	NO	NO	NO	NA	NO	4	Both	Both	Both	Female	Female	Female	Female	Female	Female
FBgn0260965	CG42588	YES	3	3	5	0	8	NO	NO	NO	NO	NA	NO	4	Female	Female	Female	Male	Male	Male	Female	Female	Neither
FBgn0037548	CG7900	NO	0	0	2	0	2	NO	NO	NO	NO	NA	NO	4	Neither	Neither	Neither	Neither	Neither	Neither	Female	Female	Neither
FBgn0035027	CG3511	NO	0	0	7	0	7	NO	NO	NO	NO	NA	NO	1	Female	Female	Female	Female	Female	Female	Neither	Neither	Female
FBgn0033762	ZnT49B	YES	3	0	4	3	7	NO	NO	NO	NO	NA	NO	4	Female	Female	Female	Both	Both	Both	NA	NA	Female
FBgn0021796	Tor	NO	0	0	4	0	4	NO	NO	NO	NO	NA	NO	4	Female	Female	Female	Neither	Neither	Neither	Neither	Neither	Female
FBgn0035142	Hipk	YES	3	0	1	3	4	NO	NO	YES	NO	NA	NO	4	Neither	Neither	Neither	Both	Both	Both	Neither	Neither	Female
FBgn0285917	sbb	YES	3	0	5	3	8	NO	NO	NO	NO	SC	YES	4	Both	Both	Both	Female	Female	Female	Female	Female	Neither
FBgn0010339	128up	NO	0	0	8	0	8	NO	NO	NO	NO	NA	NO	4	Female	Female	Female	Female	Female	Female	Female	Female	Neither
FBgn0001296	kar	YES	1	0	1	1	2	NO	NO	NO	NO	NA	NO	1	Neither	Both	Female	Neither	Neither	Neither	Neither	Neither	Neither
FBgn0033913	CG8468	YES	1	0	3	1	4	NO	NO	NO	NO	NA	NO	1	Both	Female	NA	Female	Neither	Female	Neither	Neither	Neither
FBgn0031294	IA-2	NO	0	0	1	0	1	NO	NO	NO	NO	NA	NO	4	NA	Neither	NA	NA	Neither	Neither	Female	NA	NA
FBgn0032465	Yip1d1	YES	3	0	2	3	5	NO	NO	NO	NO	NA	NO	4	Neither	Neither	Neither	Both	Both	Both	Female	Female	Neither
FBgn0015247	Diap2	NO	0	0	1	0	1	NO	NO	NO	NO	NA	NO	4	Neither	Neither	Neither	Neither	Neither	Neither	Neither	Neither	Female
FBgn0262579	Sarm	YES	2	2	3	0	5	NO	NO	NO	NO	NA	NO	4	Neither	Neither	Neither	Male	Male	Neither	Female	Female	Female
FBgn0038593	Vps39	NO	0	0	1	0	1	NO	NO	NO	NO	NA	NO	4	Neither	Neither	Neither	Neither	Neither	Neither	Neither	Neither	Female
FBgn0034068	casp	YES	2	0	2	2	4	NO	NO	NO	NO	NA	NO	4	Both	Both	Female	Neither	Neither	Neither	Neither	Neither	Female
FBgn0040308	Jafrac2	YES	3	0	1	3	4	YES	NO	YES	NO	NA	NO	4	Neither	Neither	Neither	Both	Both	Both	Neither	Female	NA
FBgn0039227	polybromo	NO	0	0	5	0	5	NO	NO	NO	NO	NA	NO	4	Female	Female	Female	NA	NA	NA	Female	Female	Neither
FBgn0034084	CG8435	YES	3	3	2	0	5	NO	NO	NO	NO	NA	NO	4	Neither	Neither	Neither	Male	Male	Male	Female	Female	Neither
FBgn0027569	cert	NO	0	0	3	0	3	NO	NO	NO	NO	NA	NO	4	Female	Female	Female	Neither	Neither	Neither	Neither	Neither	Neither
FBgn0265935	coro	NO	0	0	1	0	1	NO	NO	NO	NO	NA	NO	4	Neither	Neither	Neither	Neither	Neither	Neither	NA	NA	Female
FBgn0027903	PolD2	NO	0	0	7	0	7	NO	NO	NO	NO	NA	NO	1	Female	Female	Female	Female	Female	Female	Neither	Neither	Female
FBgn0028980	tant	YES	3	2	5	1	8	NO	NO	NO	NO	NA	NO	4	Female	Female	Female	Both	Male	Male	Female	Female	Neither
FBgn0036004	Jarid2	NO	0	0	3	0	3	NO	NO	YES	NO	NA	NO	4	Neither	Neither	Neither	Neither	Neither	Neither	Female	Female	Female
FBgn0033763	CG8646	YES	1	0	2	1	3	NO	NO	NO	NO	NA	NO	0	NA	Female	NA	NA	Both	NA	Female	NA	NA
FBgn0010825	Gug	YES	2	2	6	0	8	NO	NO	NO	NO	SC	YES	4	Female	Female	Female	Neither	Male	Male	Female	Female	Female
FBgn0031493	Sf3b2	NO	0	0	1	0	1	NO	NO	NO	NO	NA	NO	4	NA	NA	NA	NA	NA	NA	Neither	Neither	Female
FBgn0030502	tth	NO	0	0	3	0	3	NO	NO	NO	NO	NA	NO	4	Neither	Neither	Neither	Female	Female	Female	Neither	Neither	Neither
FBgn0043362	bchs	NO	0	0	6	0	6	NO	NO	NO	NO	NA	NO	4	Female	Female	Female	Female	Female	Female	Neither	Neither	Neither
FBgn0039636	Atg14	NO	0	0	3	0	3	NO	NO	NO	NO	NA	NO	4	Female	Female	Female	Neither	Neither	Neither	Neither	Neither	Neither
FBgn0033052	SCAP	NO	0	0	2	0	2	NO	NO	NO	NO	NA	NO	4	Female	Neither	Neither	NA	NA	NA	Neither	Female	Neither
FBgn0032815	CG10462	YES	3	0	3	3	6	NO	NO	NO	NO	NA	NO	4	Both	Both	Both	NA	NA	NA	Female	Female	Female
FBgn0030328	Amun	NO	0	0	2	0	2	NO	NO	NO	NO	NA	NO	4	NA	NA	NA	NA	NA	NA	Female	Female	Neither
FBgn0260632	dl	YES	3	0	3	3	6	NO	NO	NO	NO	NA	NO	4	Both	Both	Both	Neither	Neither	Neither	Female	Female	Female
FBgn0002552	lin	NO	0	0	3	0	3	NO	NO	NO	NO	NA	NO	4	Female	Female	Female	Neither	Neither	Neither	NA	NA	Neither
FBgn0037109	MED1	NO	0	0	3	0	3	NO	NO	NO	NO	NA	NO	4	Female	Female	Female	NA	NA	NA	Neither	Neither	Neither
FBgn0036587	CG4950	NO	0	0	3	0	3	NO	NO	NO	NO	NA	NO	2	Neither	Female	Neither	Female	Female	Neither	Neither	Neither	Neither
FBgn0086129	snama	NO	0	0	3	0	3	NO	NO	NO	NO	NA	NO	4	Neither	Neither	Neither	Female	Female	Female	NA	NA	Neither
FBgn0036661	CG9705	NO	0	0	3	0	3	NO	NO	NO	NO	NA	NO	4	Neither	Neither	Neither	Female	Female	Female	Neither	Neither	Neither
FBgn0035298	SCOT	NO	0	0	8	0	8	NO	NO	NO	NO	NA	NO	4	Female	Female	Female	Female	Female	Female	Female	Female	Neither
FBgn0261792	snRNP-U1-C	NO	0	0	4	0	4	NO	NO	NO	NO	NA	NO	4	Female	Female	Female	NA	NA	NA	Neither	Neither	Female
FBgn0031860	Daao2	NO	0	0	6	0	6	NO	NO	NO	NO	NA	NO	0	Female	Female	Female	Female	Female	Female	Neither	Neither	Neither
FBgn0266410	CG45050	NO	0	0	4	0	4	NO	NO	NO	NO	NA	NO	4	Female	Female	Neither	Neither	Neither	Neither	Female	Female	Neither
FBgn0034072	Dg	YES	6	0	2	6	8	NO	NO	NO	NO	NA	NO	4	Both	Both	Both	Both	Both	Both	Female	Female	Neither
FBgn0032603	CG17928	YES	5	0	2	5	7	NO	NO	NO	NO	NA	NO	4	Both	Both	Female	Both	Both	Both	Neither	Neither	Female
FBgn0260938	tay	NO	0	0	1	0	1	NO	NO	NO	NO	NA	NO	4	NA	NA	NA	NA	NA	NA	NA	NA	Female
FBgn0262738	norpA	NO	0	0	1	0	1	NO	NO	NO	NO	NA	NO	4	NA	NA	NA	NA	NA	NA	Neither	Neither	Female
FBgn0039634	alpha-Man-Ib	NO	0	0	5	0	5	NO	NO	NO	NO	NA	NO	4	Female	Female	Female	Neither	NA	NA	Female	Female	Neither
FBgn0034722	Rtf1	NO	0	0	2	0	2	NO	NO	NO	NO	NA	NO	4	Neither	Neither	Neither	Neither	Neither	Neither	Female	Female	Neither
FBgn0040256	Ugt35C1	NO	0	0	1	0	1	NO	NO	NO	NO	NA	NO	4	Neither	NA	NA	Neither	Neither	Neither	Neither	NA	Female
FBgn0283480	Alp2	NO	0	0	1	0	1	NO	NO	NO	NO	NA	NO	1	NA	NA	NA	NA	NA	NA	Neither	Neither	Female
FBgn0000299	Col4a1	NO	0	0	4	0	4	NO	NO	YES	NO	NA	NO	4	Female	Female	Female	Neither	Neither	Neither	Neither	Neither	Female
FBgn0027565	CG5498	NO	0	0	1	0	1	NO	NO	NO	NO	NA	NO	4	NA	NA	NA	NA	NA	NA	Neither	Neither	Female
FBgn0004507	GlyP	YES	1	0	0	1	1	NO	NO	YES	NO	NA	NO	4	Neither	Neither	Neither	Neither	Neither	Neither	Neither	Neither	Both
FBgn0033033	scaf	NO	0	0	2	0	2	NO	NO	NO	NO	NA	NO	4	Neither	Neither	Neither	NA	NA	NA	Female	Female	Neither
FBgn0038961	CG13850	NO	0	0	4	0	4	NO	NO	NO	NO	NA	NO	4	Female	Female	Female	Neither	Neither	Neither	NA	NA	Female
FBgn0031888	Pvf2	NO	0	0	1	0	1	NO	NO	NO	NO	NA	NO	4	Neither	Female	Neither	Neither	Neither	Neither	Neither	NA	Neither
FBgn0032819	CG10463	YES	3	0	1	3	4	NO	NO	NO	NO	NA	NO	2	Both	Both	Both	NA	NA	NA	Female	Neither	Neither
FBgn0036493	CG7255	YES	3	0	4	3	7	NO	NO	NO	NO	NA	NO	4	Female	Female	Both	Both	Female	Both	Neither	Neither	Female
FBgn0015623	Cpr	NO	0	0	1	0	1	NO	NO	YES	NO	NA	NO	4	Neither	Neither	Neither	Neither	Neither	Neither	Neither	Neither	Female
FBgn0039125	Ndc1	NO	0	0	1	0	1	NO	NO	NO	NO	NA	NO	2	Neither	Neither	Neither	Neither	Neither	Neither	Neither	Neither	Female
FBgn0030869	Socs16D	YES	3	3	0	0	3	NO	NO	NO	NO	NA	NO	4	NA	Neither	NA	Male	Male	Male	Neither	Neither	Neither
FBgn0032084	CG13101	NO	0	0	7	0	7	NO	NO	NO	NO	NA	NO	4	Female	Female	Female	Female	Female	Female	Neither	Female	Neither
FBgn0019960	Mitofilin	NO	0	0	2	0	2	NO	NO	YES	NO	NA	NO	4	Neither	Neither	Neither	Neither	Neither	Neither	Female	Female	Neither
FBgn0037105	S1P	NO	0	0	2	0	2	NO	NO	YES	NO	NA	NO	4	Neither	Neither	Neither	NA	NA	NA	Female	Neither	Female
FBgn0285963	CG46339	YES	3	0	6	3	9	NO	NO	NO	NO	NA	NO	4	Both	Both	Both	Female	Female	Female	Female	Female	Female
FBgn0028984	Spn88Ea	NO	0	0	5	0	5	YES	NO	NO	NO	NA	NO	4	NA	NA	NA	Female	Female	Neither	Female	Female	Female
FBgn0039831	CG12054	YES	3	1	3	2	6	NO	NO	NO	NO	NA	NO	4	Female	Female	Female	Male	Both	Both	Neither	Neither	Neither
FBgn0052699	LPCAT	NO	0	0	1	0	1	NO	NO	NO	NO	NA	NO	4	NA	NA	NA	NA	NA	NA	Neither	Neither	Female
FBgn0036141	wls	YES	5	5	0	0	5	NO	NO	NO	NO	NA	NO	4	Male	Male	Neither	Male	Male	Male	Neither	Neither	Neither
FBgn0283472	S6k	YES	2	0	4	2	6	NO	NO	NO	NO	NA	NO	4	Both	Both	Female	Neither	Neither	Neither	Female	Female	Female
FBgn0052485	CG32485	NO	0	0	9	0	9	NO	NO	NO	NO	NA	NO	4	Female	Female	Female	Female	Female	Female	Female	Female	Female
FBgn0032224	Sps2	YES	3	0	1	3	4	NO	NO	NO	NO	NA	NO	4	Neither	Neither	Neither	Both	Both	Both	Neither	Neither	Female
FBgn0013765	cnn	NO	0	0	7	0	7	NO	NO	NO	NO	NA	NO	4	Female	Female	Female	Female	Female	Neither	Female	NA	Female
FBgn0031661	Gmd	NO	0	0	9	0	9	NO	NO	NO	NO	NA	NO	4	Female	Female	Female	Female	Female	Female	Female	Female	Female
FBgn0010380	AP-1-2beta	NO	0	0	1	0	1	NO	NO	NO	NO	NA	NO	4	NA	NA	NA	NA	NA	NA	NA	NA	Female
FBgn0017566	ND-75	NO	0	0	2	0	2	NO	NO	YES	NO	NA	NO	4	NA	NA	NA	NA	NA	NA	Female	Female	Neither
FBgn0040752	Prosap	YES	6	0	1	6	7	NO	NO	YES	NO	MC	YES	4	Both	Both	Both	Both	Both	Both	Neither	Neither	Female
FBgn0033297	Mal-A8	NO	0	0	2	0	2	NO	NO	NO	NO	NA	NO	0	NA	NA	Female	NA	NA	Female	NA	NA	NA
FBgn0037442	gzl	YES	2	0	6	2	8	NO	NO	NO	NO	NA	NO	4	Female	Both	Both	Female	Female	Female	Female	Female	Neither
FBgn0043884	mask	YES	3	0	6	3	9	NO	NO	NO	NO	NA	NO	4	Both	Both	Both	Female	Female	Female	Female	Female	Female
FBgn0016701	Rab4	YES	3	0	0	3	3	NO	YES	NO	NO	NA	YES	4	Both	Both	Both	NA	NA	NA	NA	NA	Neither
FBgn0036376	Liprin-beta	YES	2	2	0	0	2	NO	NO	NO	NO	NA	NO	4	Neither	Neither	Neither	Neither	Neither	Neither	Male	Male	Neither
FBgn0035791	CG8539	NO	0	0	7	0	7	NO	NO	NO	NO	NA	NO	1	Female	Female	Female	Female	Female	Female	Neither	Neither	Female
FBgn0027619	eIF3j	NO	0	0	3	0	3	NO	NO	NO	NO	NA	NO	4	Neither	Neither	Neither	Female	Female	Female	Neither	Neither	Neither
FBgn0028939	NimC2	NO	0	0	1	0	1	NO	NO	NO	NO	NA	NO	0	Neither	Female	NA	Neither	Neither	NA	Neither	NA	NA
FBgn0015737	Hmu	YES	3	0	3	3	6	NO	NO	NO	NO	NA	NO	4	Both	Both	Both	Neither	Neither	Neither	Female	Female	Female
FBgn0261988	Gprk2	NO	0	0	2	0	2	NO	NO	NO	NO	NA	NO	4	Neither	Neither	Neither	Neither	Neither	Neither	Female	Female	Neither
FBgn0001169	H	NO	0	0	5	0	5	NO	NO	NO	NO	NA	NO	4	Neither	Neither	Neither	Female	Neither	Female	Female	Female	Female
FBgn0039642	CG11882	NO	0	0	6	0	6	NO	NO	NO	NO	NA	NO	2	Female	Female	Female	Female	Neither	Female	Neither	Neither	Female
FBgn0266670	Sec5	YES	3	0	4	3	7	NO	NO	NO	NO	NA	NO	4	Female	Female	Female	Both	Both	Both	Neither	Neither	Female
FBgn0039219	CG13630	NO	0	0	2	0	2	NO	NO	NO	NO	NA	NO	4	Neither	Neither	Neither	NA	NA	NA	Female	Female	Neither
FBgn0031897	CG13784	NO	0	0	5	0	5	NO	NO	NO	NO	SC	YES	4	Neither	Neither	Neither	Female	Female	Female	Female	Female	Neither
FBgn0287724	Ca-beta	NO	0	0	1	0	1	NO	NO	NO	NO	NA	NO	4	Neither	Neither	NA	Neither	Female	Neither	Neither	NA	Neither
FBgn0040475	SH3PX1	NO	0	0	3	0	3	NO	NO	NO	NO	NA	NO	4	Female	Female	Female	NA	NA	NA	Neither	Neither	Neither
FBgn0035839	CG7550	NO	0	0	6	0	6	NO	NO	NO	NO	NA	NO	4	Female	Female	Female	Female	Female	Female	Neither	Neither	Neither
FBgn0005596	yem	YES	1	1	0	0	1	NO	NO	NO	NO	NA	NO	3	Neither	Neither	Male	Neither	Neither	Neither	NA	NA	Neither
FBgn0284256	bsf	NO	0	0	1	0	1	NO	NO	NO	NO	NA	NO	4	Neither	Neither	Neither	Neither	Neither	Neither	Neither	Neither	Female
FBgn0038388	CG4287	YES	3	0	0	3	3	NO	NO	NO	NO	NA	NO	4	Both	Both	Both	Neither	Neither	Neither	Neither	Neither	NA
FBgn0052109	CG32109	NO	0	0	5	0	5	NO	NO	NO	NO	NA	NO	4	Neither	Neither	Neither	Female	Female	Female	Female	Neither	Female
FBgn0262114	RanBPM	NO	0	0	3	0	3	NO	NO	NO	NO	NA	NO	4	Neither	Neither	Neither	NA	NA	NA	Female	Female	Female
FBgn0263605	l(3)72Dn	YES	2	0	1	2	3	NO	NO	NO	NO	NA	NO	3	Both	Both	Female	Neither	Neither	Neither	Neither	Neither	Neither
FBgn0034073	CG8414	NO	0	0	9	0	9	NO	NO	NO	NO	NA	NO	3	Female	Female	Female	Female	Female	Female	Female	Female	Female
FBgn0027081	ThrRS	YES	3	0	5	3	8	NO	NO	YES	NO	NA	NO	4	Female	Female	Female	Both	Both	Both	Female	Female	Neither
FBgn0031598	Vps53	NO	0	0	1	0	1	NO	NO	NO	NO	NA	NO	4	Neither	Neither	Neither	Neither	Neither	Neither	Neither	Neither	Female
FBgn0035959	CG4911	NO	0	0	6	0	6	NO	NO	NO	NO	NA	NO	4	Female	Female	Female	NA	NA	NA	Female	Female	Female
FBgn0004657	mys	NO	0	0	1	0	1	NO	NO	YES	NO	NA	NO	4	NA	NA	NA	NA	NA	NA	Neither	Neither	Female
FBgn0034035	CG8207	NO	0	0	3	0	3	NO	NO	NO	NO	NA	NO	4	Neither	Neither	Neither	Female	Female	Female	NA	NA	Neither
FBgn0284221	Sema5c	YES	3	0	6	3	9	NO	NO	NO	NO	NA	NO	4	Both	Both	Both	Female	Female	Female	Female	Female	Female
FBgn0039689	CIA30	NO	0	0	6	0	6	NO	NO	NO	NO	NA	NO	4	Female	Female	Female	Neither	Neither	Neither	Female	Female	Female
FBgn0027779	VhaSFD	NO	0	0	6	0	6	NO	NO	YES	NO	NA	NO	4	Female	Female	Female	Neither	Neither	Neither	Female	Female	Female
FBgn0040234	c12.2	NO	0	0	1	0	1	NO	NO	NO	NO	NA	NO	4	NA	NA	NA	NA	NA	NA	Neither	Neither	Female
FBgn0010591	Sply	NO	0	0	3	0	3	NO	NO	NO	NO	NA	NO	4	Neither	Neither	Neither	Female	Female	Female	NA	NA	Neither
FBgn0039495	CG5909	NO	0	0	5	0	5	NO	NO	NO	NO	NA	NO	0	Neither	NA	Female	Female	Neither	Female	Female	Female	Neither
FBgn0036714	CG7692	NO	0	0	4	0	4	NO	NO	NO	NO	NA	NO	3	Neither	Female	NA	Female	Female	Female	Neither	NA	Neither
FBgn0028886	CG15279	NO	0	0	3	0	3	NO	NO	NO	NO	NA	NO	3	NA	Neither	NA	Female	Female	Female	Neither	NA	Neither
FBgn0038660	Sgsh	NO	0	0	2	0	2	NO	NO	NO	NO	NA	NO	1	Neither	Female	Female	Neither	Neither	Neither	Neither	Neither	NA
FBgn0034908	CG5543	NO	0	0	6	0	6	NO	NO	NO	NO	NA	NO	4	NA	NA	NA	Female	Female	Female	Female	Female	Female
FBgn0034114	CG4282	YES	4	0	2	4	6	NO	NO	NO	NO	NA	NO	3	Female	Both	Female	Both	Both	Both	Neither	Neither	NA
FBgn0003053	peb	NO	0	0	1	0	1	NO	NO	NO	NO	NA	NO	0	NA	NA	NA	NA	NA	NA	NA	Neither	Female
FBgn0038666	Smu1	NO	0	0	4	0	4	NO	NO	NO	NO	NA	NO	4	Female	Female	Female	NA	NA	NA	Neither	Neither	Female
FBgn0035986	CG4022	NO	0	0	9	0	9	NO	NO	NO	NO	NA	NO	4	Female	Female	Female	Female	Female	Female	Female	Female	Female
FBgn0031374	Wdr62	YES	1	0	8	1	9	NO	NO	NO	NO	NA	NO	4	Both	Female	Female	Female	Female	Female	Female	Female	Female
FBgn0014007	Ptp69D	NO	0	0	8	0	8	NO	NO	NO	NO	NA	NO	4	Female	Female	Female	Female	Female	Female	Female	Female	Neither
FBgn0046692	Stlk	NO	0	0	1	0	1	NO	NO	NO	NO	NA	NO	4	Neither	Neither	Neither	Neither	Neither	Neither	Neither	Neither	Female
FBgn0034723	CG13506	NO	0	0	8	0	8	NO	NO	NO	NO	NA	NO	4	Female	Female	Female	Female	Female	Female	Female	Female	Neither
FBgn0025697	santa-maria	NO	0	0	5	0	5	NO	NO	NO	NO	NA	NO	4	Neither	Neither	Neither	Female	Female	Female	Female	Female	Neither
FBgn0000543	ecd	NO	0	0	9	0	9	NO	NO	NO	NO	NA	NO	4	Female	Female	Female	Female	Female	Female	Female	Female	Female
FBgn0011224	heph	NO	0	0	2	0	2	NO	NO	YES	NO	SC	YES	4	Neither	Neither	Neither	Female	Female	Neither	Neither	Neither	Neither
FBgn0260748	CG5004	NO	0	0	9	0	9	NO	NO	NO	NO	NA	NO	4	Female	Female	Female	Female	Female	Female	Female	Female	Female
FBgn0035268	CG8001	YES	1	0	2	1	3	NO	NO	NO	NO	NA	NO	4	Neither	Neither	Neither	Female	Female	Both	Neither	Neither	Neither
FBgn0037012	Rcd2	NO	0	0	3	0	3	NO	NO	NO	NO	NA	NO	4	NA	Neither	Neither	Neither	Female	Neither	Female	Female	Neither
FBgn0033897	Rcd1	NO	0	0	9	0	9	NO	NO	NO	NO	NA	NO	4	Female	Female	Female	Female	Female	Female	Female	Female	Female
FBgn0027843	CAH2	NO	0	0	4	0	4	NO	NO	NO	NO	NA	NO	4	Female	Female	Female	Neither	Neither	Neither	Neither	Neither	Female
FBgn0052176	CG32176	NO	0	0	1	0	1	NO	NO	NO	NO	NA	NO	3	Neither	Neither	Neither	Neither	Neither	Female	NA	NA	Neither
FBgn0013799	Deaf1	NO	0	0	2	0	2	NO	NO	NO	NO	NA	NO	4	Neither	Female	Neither	Neither	Neither	Neither	Neither	Female	Neither
FBgn0036266	Tsen54	NO	0	0	3	0	3	NO	NO	NO	NO	NA	NO	1	Neither	Neither	Neither	Female	Female	Female	Neither	Neither	Neither
FBgn0031896	CG4502	NO	0	0	3	0	3	NO	NO	NO	NO	NA	NO	4	Neither	Neither	Neither	Female	Female	Female	Neither	Neither	NA
FBgn0010488	NAT1	NO	0	0	1	0	1	NO	NO	NO	NO	NA	NO	4	Neither	Neither	Neither	Neither	Neither	Neither	Neither	Neither	Female
FBgn0032178	Spn31A	YES	1	0	6	1	7	NO	NO	NO	NO	NA	NO	3	Female	Female	Neither	Female	Both	Female	Female	Neither	Female
FBgn0036377	CG10710	NO	0	0	1	0	1	NO	NO	NO	NO	NA	NO	1	NA	Neither	NA	NA	NA	NA	Female	NA	NA
FBgn0051102	CG31102	NO	0	0	5	0	5	NO	NO	NO	NO	NA	NO	4	Female	Female	Female	NA	NA	NA	Female	Female	Neither
FBgn0285892	tea	NO	0	0	5	0	5	NO	NO	NO	NO	NA	NO	4	Female	Female	NA	Female	Female	Female	NA	NA	Neither
FBgn0032208	Ufd4	YES	3	0	5	3	8	NO	NO	NO	NO	NA	NO	4	Female	Female	Female	Both	Both	Both	Female	Female	Neither
FBgn0038755	Hs6st	NO	0	0	3	0	3	NO	NO	NO	NO	NA	NO	4	Neither	Neither	Neither	Female	Female	Female	NA	Neither	Neither
FBgn0036053	iPLA2-VIA	NO	0	0	9	0	9	NO	NO	NO	NO	NA	NO	4	Female	Female	Female	Female	Female	Female	Female	Female	Female
FBgn0038473	Ns1	YES	3	0	4	3	7	NO	NO	NO	NO	NA	NO	4	Female	Female	Female	Both	Both	Both	Neither	Neither	Female
FBgn0031717	Oscillin	NO	0	0	1	0	1	NO	NO	NO	NO	NA	NO	4	Neither	Neither	Neither	Neither	Neither	Neither	Neither	Neither	Female
FBgn0033710	CG17739	YES	5	0	3	5	8	NO	NO	NO	NO	NA	NO	4	Both	Both	Female	Both	Both	Both	Female	Female	Neither
FBgn0037515	Sp7	NO	0	0	1	0	1	NO	NO	NO	NO	NA	NO	4	NA	Neither	Neither	Neither	Neither	Neither	Female	Neither	Neither
FBgn0037622	CG8202	YES	3	2	0	1	3	NO	NO	NO	NO	NA	NO	4	NA	NA	NA	Male	Both	Male	Neither	Neither	Neither
FBgn0014006	Ask1	NO	0	0	4	0	4	NO	NO	NO	NO	NA	NO	4	Female	Female	Female	Neither	Neither	Neither	Neither	Neither	Female
FBgn0025455	CycT	NO	0	0	3	0	3	NO	NO	NO	NO	NA	NO	4	Female	Female	Female	Neither	Neither	Neither	Neither	Neither	Neither
FBgn0004401	Pep	NO	0	0	1	0	1	NO	NO	NO	NO	NA	NO	4	Neither	Neither	Neither	Neither	Neither	Neither	Neither	Neither	Female
FBgn0052369	CG32369	NO	0	0	8	0	8	NO	NO	NO	NO	NA	NO	4	Female	Female	Female	Female	Female	Female	Female	Female	Neither
FBgn0036762	CG7430	NO	0	0	1	0	1	NO	NO	YES	NO	NA	NO	4	Neither	Female	Neither	NA	NA	NA	Neither	Neither	Neither
FBgn0031305	Iris	YES	5	0	1	5	6	NO	NO	NO	NO	NA	NO	3	Both	Both	Both	Both	Female	Both	Neither	Neither	Neither
FBgn0005616	msl-2	YES	3	0	6	3	9	NO	NO	NO	NO	NA	NO	4	Female	Female	Female	Both	Both	Both	Female	Female	Female
FBgn0264495	gpp	NO	0	0	4	0	4	NO	NO	NO	NO	NA	NO	4	Neither	Neither	Neither	Neither	Female	Neither	Female	Female	Female
FBgn0035987	Cpsf5	NO	0	0	9	0	9	NO	NO	NO	NO	NA	NO	4	Female	Female	Female	Female	Female	Female	Female	Female	Female
FBgn0038312	Zip88E	YES	3	1	3	2	6	NO	NO	NO	NO	NA	NO	2	Female	Female	Female	Male	Both	Both	NA	NA	Neither
FBgn0034162	CG6426	NO	0	0	2	0	2	YES	NO	NO	NO	NA	NO	1	NA	NA	NA	NA	NA	NA	Female	Female	NA
FBgn0039602	CG1647	YES	3	1	0	2	3	NO	NO	NO	NO	NA	NO	3	Neither	Neither	Neither	Both	Both	Male	Neither	Neither	Neither
FBgn0036318	Wbp2	YES	3	0	2	3	5	NO	NO	YES	NO	NA	NO	4	Both	Both	Both	Neither	Neither	Neither	Female	Female	Neither
FBgn0032117	FucTB	NO	0	0	9	0	9	NO	NO	NO	NO	NA	NO	4	Female	Female	Female	Female	Female	Female	Female	Female	Female
FBgn0050285	CG30285	NO	0	0	8	0	8	NO	NO	NO	NO	NA	NO	4	Female	Female	Female	Female	Female	Female	Female	Female	Neither
FBgn0031573	CG3407	YES	2	2	3	0	5	NO	NO	NO	NO	NA	NO	3	Female	Female	Female	Male	Male	Neither	Neither	Neither	Neither
FBgn0016059	Sema1b	YES	3	0	3	3	6	NO	NO	NO	NO	NA	NO	4	Both	Both	Both	Neither	Neither	Neither	Female	Female	Female
FBgn0031813	Acox3	NO	0	0	2	0	2	NO	NO	NO	NO	NA	NO	4	Neither	Neither	Neither	Neither	Neither	Neither	Female	Female	Neither
FBgn0086657	IKKepsilon	NO	0	0	3	0	3	NO	NO	NO	NO	NA	NO	4	NA	NA	NA	NA	NA	NA	Female	Female	Female
FBgn0026570	CG5704	NO	0	0	4	0	4	NO	NO	NO	NO	NA	NO	4	Neither	Neither	Neither	Female	Female	Female	Neither	Neither	Female
FBgn0041629	Hexo2	NO	0	0	2	0	2	YES	NO	NO	NO	NA	NO	4	NA	NA	NA	NA	NA	NA	Female	Female	Neither
FBgn0266717	Bruce	NO	0	0	5	0	5	NO	NO	NO	NO	NA	NO	4	Neither	Neither	Neither	Female	Female	Female	Female	Female	Neither
FBgn0011603	ine	NO	0	0	6	0	6	NO	NO	NO	NO	NA	NO	4	Female	Female	Female	NA	NA	NA	Female	Female	Female
FBgn0014141	cher	NO	0	0	9	0	9	NO	NO	YES	NO	NA	NO	4	Female	Female	Female	Female	Female	Female	Female	Female	Female
FBgn0284257	Ttd14	YES	3	1	3	2	6	NO	YES	NO	NO	SC	YES	4	Female	Female	Female	Both	Male	Both	Neither	Neither	Neither
FBgn0033649	pyr	NO	0	0	2	0	2	NO	NO	NO	NO	NA	NO	4	NA	Female	Neither	Neither	Neither	Neither	Neither	Neither	Female
FBgn0033212	LRR	YES	3	0	6	3	9	NO	NO	NO	NO	NA	NO	4	Female	Female	Female	Both	Both	Both	Female	Female	Female
FBgn0025525	bab2	YES	3	2	0	1	3	NO	NO	NO	NO	NA	NO	3	Male	Both	Male	Neither	Neither	Neither	Neither	NA	Neither
FBgn0021760	chb	NO	0	0	1	0	1	NO	NO	NO	NO	NA	NO	4	NA	NA	NA	NA	NA	NA	Neither	Female	NA
FBgn0010497	dmGlut	NO	0	0	9	0	9	NO	NO	NO	NO	NA	NO	1	Female	Female	Female	Female	Female	Female	Female	Female	Female
FBgn0261990	CG42808	NO	0	0	3	0	3	NO	NO	NO	NO	NA	NO	2	Neither	Neither	Neither	Female	Female	Female	Neither	Neither	Neither
FBgn0039055	Rassf	NO	0	0	3	0	3	NO	NO	NO	NO	NA	NO	4	Neither	Neither	Neither	Female	Female	Female	Neither	Neither	Neither
FBgn0261555	CG42673	NO	0	0	4	0	4	NO	NO	NO	NO	NA	NO	4	Female	Female	Female	Neither	Neither	Neither	Neither	Neither	Female
FBgn0037623	CG9801	YES	3	1	1	2	4	NO	NO	NO	NO	NA	NO	4	Neither	Neither	Neither	Male	Both	Both	Female	Neither	Neither
FBgn0036101	NijA	NO	0	0	3	0	3	NO	NO	NO	NO	NA	NO	4	Neither	Neither	Neither	Neither	Female	Neither	Female	Female	Neither
FBgn0034504	CG8929	NO	0	0	6	0	6	NO	NO	NO	NO	NA	NO	4	NA	NA	NA	Female	Female	Female	Female	Female	Female
FBgn0033971	CG10209	YES	3	0	0	3	3	NO	NO	NO	NO	NA	NO	4	Both	Both	Both	NA	NA	NA	NA	NA	Neither
FBgn0032330	Samuel	YES	3	0	0	3	3	NO	NO	NO	NO	SC	YES	4	Neither	Neither	Neither	Both	Both	Both	Neither	Neither	Neither
FBgn0035482	CG14985	NO	0	0	1	0	1	NO	NO	NO	NO	NA	NO	3	Neither	Neither	Female	Neither	Neither	Neither	Neither	Neither	Neither
FBgn0027889	ball	NO	0	0	3	0	3	NO	NO	NO	NO	NA	NO	3	Neither	Neither	Neither	Female	Female	Female	Neither	Neither	Neither
FBgn0003141	pr	NO	0	0	1	0	1	NO	NO	NO	NO	NA	NO	4	NA	NA	NA	NA	NA	NA	NA	NA	Female
FBgn0053143	CG33143	YES	1	0	0	1	1	NO	NO	NO	NO	NA	NO	4	NA	Neither	NA	NA	Both	NA	Neither	NA	NA
FBgn0036913	Usp32	NO	0	0	2	0	2	NO	NO	NO	NO	NA	NO	4	Neither	Neither	NA	Neither	Neither	Neither	Female	Female	NA
FBgn0001990	wek	NO	0	0	9	0	9	NO	NO	NO	NO	NA	NO	4	Female	Female	Female	Female	Female	Female	Female	Female	Female
FBgn0250867	CG42238	NO	0	0	1	0	1	NO	NO	NO	NO	NA	NO	4	NA	NA	NA	NA	NA	NA	Neither	Neither	Female
FBgn0004926	eIF2beta	YES	2	0	1	2	3	NO	NO	NO	NO	NA	NO	4	Both	Both	Female	Neither	Neither	Neither	Neither	Neither	Neither
FBgn0040843	CG15213	NO	0	0	3	0	3	NO	NO	NO	NO	NA	NO	0	Female	Female	Female	Neither	Neither	Neither	Neither	NA	Neither
FBgn0261584	CG42694	NO	0	0	2	0	2	NO	NO	NO	NO	NA	NO	0	Neither	Female	NA	Neither	Female	Neither	Neither	NA	Neither
FBgn0039084	CG10175	NO	0	0	4	0	4	NO	NO	YES	NO	NA	NO	4	Neither	Neither	Neither	Neither	Female	Female	Female	Female	NA
FBgn0033661	CG13185	NO	0	0	5	0	5	NO	NO	NO	NO	NA	NO	4	Female	Neither	Neither	Female	Female	Female	Neither	NA	Female
FBgn0029167	Hml	YES	2	0	1	2	3	NO	NO	NO	NO	NA	NO	3	Neither	Both	Neither	Female	Both	Neither	Neither	NA	NA
FBgn0030999	Mur18B	NO	0	0	1	0	1	NO	NO	NO	NO	NA	NO	1	Neither	Neither	NA	NA	NA	NA	NA	NA	Female
FBgn0036007	path	NO	0	0	9	0	9	NO	NO	NO	NO	NA	NO	4	Female	Female	Female	Female	Female	Female	Female	Female	Female
FBgn0032643	GCS2beta	NO	0	0	1	0	1	NO	YES	NO	NO	NA	NO	4	Neither	Neither	Neither	NA	NA	NA	Neither	Neither	Female
FBgn0022160	Gpo1	YES	3	0	5	3	8	NO	NO	YES	NO	NA	NO	4	Female	Female	Female	Both	Both	Both	Female	Female	Neither
FBgn0034087	clu	YES	5	0	1	5	6	NO	NO	YES	NO	NA	NO	4	Both	Both	Female	Both	Both	Both	Neither	Neither	Neither
FBgn0053329	Sp212	NO	0	0	2	0	2	NO	NO	NO	NO	NA	NO	0	Female	Female	NA	Neither	Neither	Neither	Neither	Neither	Neither
FBgn0037979	GCC185	YES	3	0	2	3	5	NO	NO	NO	NO	NA	NO	4	Both	Both	Both	Neither	Neither	Neither	Female	Female	Neither
FBgn0035392	CG1271	YES	3	0	5	3	8	NO	NO	NO	NO	NA	NO	1	Female	Female	Female	Both	Both	Both	Female	Neither	Female
FBgn0051445	CG31445	NO	0	0	5	0	5	YES	NO	NO	NO	NA	NO	4	Female	Female	Female	Neither	Neither	Neither	Female	Female	Neither
FBgn0019890	Smg5	NO	0	0	4	0	4	NO	NO	NO	NO	NA	NO	4	Neither	Neither	Neither	Female	Female	Female	Neither	Neither	Female
FBgn0032087	CG9568	NO	0	0	3	0	3	NO	NO	NO	NO	NA	NO	0	Neither	Neither	Neither	Female	Female	Female	NA	NA	Neither
FBgn0024841	Pcd	NO	0	0	1	0	1	NO	NO	NO	NO	NA	NO	3	Neither	Neither	Neither	Neither	Neither	Neither	Female	Neither	Neither
FBgn0032343	CG6201	NO	0	0	2	0	2	NO	NO	NO	NO	NA	NO	1	Female	Female	Neither	Neither	Neither	Neither	Neither	Neither	Neither
FBgn0015279	Pi3K92E	YES	1	0	4	1	5	NO	NO	NO	NO	NA	NO	4	Neither	Neither	Neither	Female	Both	Female	Neither	Female	Female
FBgn0027620	Acf	NO	0	0	5	0	5	NO	NO	NO	NO	NA	NO	4	Neither	Neither	Neither	Female	Female	Female	Female	Female	Neither
FBgn0002643	mam	YES	2	0	3	2	5	NO	NO	NO	NO	SC	YES	4	Both	Both	Neither	Female	Female	Female	Neither	Neither	Neither
FBgn0039544	CG12877	NO	0	0	6	0	6	NO	NO	NO	NO	NA	NO	4	NA	NA	NA	Female	Female	Female	Female	Female	Female
FBgn0013342	nSyb	NO	0	0	1	0	1	NO	NO	NO	NO	NA	NO	4	Neither	Neither	NA	NA	Neither	Neither	Female	NA	NA
FBgn0085232	CG34203	YES	1	0	5	1	6	NO	NO	NO	NO	NA	NO	0	Both	Female	Neither	Female	Female	Female	Neither	Neither	Female
FBgn0010583	dock	YES	3	0	0	3	3	NO	NO	NO	NO	NA	NO	4	Both	Both	Both	Neither	Neither	Neither	Neither	Neither	Neither
FBgn0267828	Fatp1	YES	3	0	2	3	5	NO	NO	NO	NO	MC	YES	4	Neither	Neither	Neither	Both	Both	Both	Female	Female	Neither
FBgn0034643	CG10321	NO	0	0	2	0	2	NO	NO	NO	NO	NA	NO	4	Neither	Neither	Neither	Neither	Neither	Neither	Female	Female	Neither
FBgn0031417	CG3597	NO	0	0	3	0	3	NO	NO	NO	NO	NA	NO	4	Neither	Neither	Neither	Neither	Neither	Neither	Female	Female	Female
FBgn0265998	Doa	YES	1	1	1	0	2	NO	NO	YES	NO	NA	NO	4	Neither	Male	Neither	Neither	Neither	Neither	Female	Neither	Neither
FBgn0267365	l(2)SH0834	NO	0	0	5	0	5	NO	NO	NO	NO	NA	NO	4	Female	Female	Neither	Neither	Neither	Neither	Female	Female	Female
FBgn0038818	Nep4	NO	0	0	2	0	2	NO	NO	NO	NO	NA	NO	4	Neither	NA	NA	Female	NA	Female	NA	NA	Neither
FBgn0004227	nonA	NO	0	0	1	0	1	NO	NO	NO	NO	NA	NO	4	Neither	Neither	Neither	NA	NA	NA	Neither	Neither	Female
FBgn0036812	Nufip	YES	2	0	3	2	5	NO	NO	NO	NO	NA	NO	0	Neither	Neither	Neither	Both	Female	Both	Female	Female	Neither
FBgn0264087	Slob	NO	0	0	2	0	2	NO	NO	NO	NO	NA	NO	4	NA	Neither	Neither	Neither	Neither	Neither	NA	Female	Female
FBgn0038809	CG16953	NO	0	0	8	0	8	YES	YES	NO	NO	NA	YES	4	Female	Female	Female	Female	Female	Female	Female	Female	Neither
FBgn0010278	Ssrp	NO	0	0	6	0	6	NO	NO	NO	NO	NA	NO	4	NA	NA	NA	Female	Female	Female	Female	Female	Female
FBgn0036199	Bmcp	NO	0	0	4	0	4	NO	NO	NO	NO	NA	NO	3	Female	Female	Female	Neither	Neither	Neither	NA	NA	Female
FBgn0001297	kay	YES	3	3	3	0	6	NO	NO	NO	NO	NA	NO	4	Female	Female	Female	Male	Male	Male	Neither	Neither	Neither
FBgn0034951	CG3860	YES	3	0	0	3	3	NO	NO	NO	NO	NA	NO	4	Neither	Neither	Neither	Both	Both	Both	Neither	Neither	Neither
FBgn0004795	retn	YES	3	3	3	0	6	NO	NO	NO	NO	NA	NO	4	Female	Female	Female	Male	Male	Male	Neither	Neither	Neither
FBgn0035235	CG7879	NO	0	0	8	0	8	NO	NO	NO	NO	NA	NO	4	Female	Female	Female	Female	Female	Female	Female	Female	Neither
FBgn0041150	hoe1	NO	0	0	2	0	2	NO	NO	NO	NO	NA	NO	4	Neither	Neither	Neither	Neither	Neither	Neither	Female	Female	Neither
FBgn0031996	CG8460	YES	6	0	3	6	9	NO	YES	NO	NO	NA	YES	4	Both	Both	Both	Both	Both	Both	Female	Female	Female
FBgn0004924	Top1	NO	0	0	5	0	5	NO	NO	NO	NO	NA	NO	4	Female	Female	Female	NA	NA	NA	Female	Female	Neither
FBgn0031990	PAPLA1	YES	6	0	3	6	9	NO	NO	NO	NO	NA	NO	4	Both	Both	Both	Both	Both	Both	Female	Female	Female
FBgn0259229	CG42329	NO	0	0	6	0	6	NO	NO	NO	NO	NA	NO	0	Neither	Neither	Neither	Female	Female	Female	Female	Female	Female
FBgn0266417	ringer	YES	1	0	1	1	2	NO	NO	NO	NO	NA	NO	4	Neither	Both	Neither	Neither	Female	Neither	Neither	Neither	Neither
FBgn0085450	Snoo	NO	0	0	6	0	6	NO	NO	NO	NO	NA	NO	4	Neither	Neither	Neither	Female	Female	Female	Female	Female	Female
FBgn0283510	Pal1	NO	0	0	5	0	5	NO	NO	NO	NO	NA	NO	4	Neither	Neither	NA	Female	Female	Female	Neither	Female	Female
FBgn0039303	CG11857	NO	0	0	1	0	1	NO	NO	NO	NO	NA	NO	4	Female	Neither	Neither	NA	NA	NA	Neither	Neither	NA
FBgn0035911	CG6638	NO	0	0	8	0	8	NO	NO	NO	NO	NA	NO	3	Female	Female	Female	Female	Female	Female	Female	Female	Neither
FBgn0039637	Ctl2	YES	3	0	3	3	6	NO	NO	NO	NO	NA	NO	4	Neither	Neither	Neither	Both	Both	Both	Female	Female	Female
FBgn0035588	Dhrs4	YES	3	0	6	3	9	NO	NO	NO	NO	NA	NO	4	Female	Female	Female	Both	Both	Both	Female	Female	Female
FBgn0039738	Mgat2	NO	0	0	5	0	5	NO	NO	NO	NO	NA	NO	4	Neither	Neither	Neither	Female	Female	Female	Female	Female	Neither
FBgn0003888	betaTub60D	NO	0	0	3	0	3	NO	NO	YES	NO	NA	NO	4	Female	Female	Female	Neither	Neither	Neither	Neither	Neither	Neither
FBgn0037846	CG6574	NO	0	0	5	0	5	NO	NO	NO	NO	NA	NO	4	Female	Female	Female	Neither	Neither	Neither	Female	Neither	Female
FBgn0035272	mRpL46	NO	0	0	2	0	2	NO	NO	NO	NO	NA	NO	4	NA	NA	NA	NA	NA	NA	Female	Female	Neither
FBgn0038100	Paip2	NO	0	0	1	0	1	NO	NO	NO	NO	NA	NO	4	Neither	Neither	Neither	Neither	Neither	Neither	Neither	Neither	Female
FBgn0031260	Spp	YES	3	0	0	3	3	NO	NO	NO	NO	NA	NO	4	Neither	Neither	Neither	Both	Both	Both	Neither	Neither	Neither
FBgn0034354	GstE11	YES	6	6	0	0	6	NO	NO	NO	NO	NA	NO	4	Male	Male	Male	Male	Male	Male	NA	NA	Neither
FBgn0020251	sfl	YES	6	1	1	5	7	NO	NO	NO	NO	NA	NO	4	Both	Both	Both	Male	Both	Both	Neither	Female	Neither
FBgn0034495	CG11788	NO	0	0	2	0	2	NO	NO	NO	NO	NA	NO	0	NA	NA	NA	Neither	Neither	Neither	Female	Female	Neither
FBgn0031266	Sf3b1	NO	0	0	5	0	5	NO	NO	NO	NO	NA	NO	4	Neither	Neither	Neither	Female	Female	Female	Female	Female	Neither
FBgn0264389	opm	NO	0	0	2	0	2	NO	NO	NO	NO	NA	NO	4	Neither	Female	Female	NA	NA	NA	Neither	Neither	Neither
FBgn0013334	Sap47	NO	0	0	2	0	2	NO	NO	NO	NO	NA	NO	4	Female	Female	Neither	Neither	Neither	Neither	Neither	Neither	Neither
FBgn0039073	CG4408	NO	0	0	3	0	3	NO	NO	NO	NO	NA	NO	1	Neither	Neither	Neither	Female	Female	Female	Neither	Neither	Neither
FBgn0031377	CG15356	NO	0	0	3	0	3	NO	NO	NO	NO	NA	NO	4	Neither	Neither	Neither	Female	Neither	Female	Female	Neither	Neither
FBgn0034401	MetRS	NO	0	0	6	0	6	NO	NO	NO	NO	NA	NO	4	Female	Female	Female	Neither	Neither	Neither	Female	Female	Female
FBgn0019990	Gcn2	NO	0	0	2	0	2	NO	NO	NO	NO	NA	NO	4	Neither	Female	Neither	Neither	Neither	Neither	Neither	Female	Neither
FBgn0261573	CoRest	NO	0	0	6	0	6	NO	NO	NO	NO	NA	NO	4	Female	Female	Female	NA	NA	NA	Female	Female	Female
FBgn0027348	bgm	NO	0	0	2	0	2	NO	NO	NO	NO	NA	NO	3	Female	Neither	Female	Neither	Neither	Neither	Neither	Neither	Neither
FBgn0039528	dsd	NO	0	0	6	0	6	NO	NO	NO	NO	NA	NO	4	Female	Female	Female	Female	Female	Female	Neither	Neither	Neither
FBgn0034689	CG2921	YES	3	0	0	3	3	NO	NO	NO	NO	NA	NO	4	Both	Both	Both	Neither	Neither	Neither	Neither	Neither	Neither
FBgn0027836	Dgp-1	NO	0	0	2	0	2	NO	NO	NO	NO	NA	NO	4	Neither	Neither	Neither	NA	NA	NA	Female	Neither	Female
FBgn0039769	CG15534	NO	0	0	1	0	1	NO	NO	NO	NO	NA	NO	0	Neither	NA	NA	Neither	Neither	Neither	NA	NA	Female
FBgn0261535	l(2)34Fd	NO	0	0	5	0	5	NO	NO	NO	NO	NA	NO	3	Neither	Neither	Neither	Female	Female	Female	Female	Female	Neither
FBgn0033376	CG8777	NO	0	0	3	0	3	NO	NO	NO	NO	NA	NO	4	Neither	Neither	Neither	Female	Female	Female	NA	NA	Neither
FBgn0039302	Nup358	YES	1	0	2	1	3	NO	NO	YES	NO	NA	NO	4	Female	Both	Female	NA	NA	NA	Neither	Neither	NA
FBgn0000536	eas	NO	0	0	1	0	1	NO	NO	NO	NO	MC	NO	4	NA	NA	NA	NA	NA	NA	NA	NA	Female
FBgn0011722	Tig	NO	0	0	5	0	5	NO	NO	YES	NO	NA	NO	4	Female	Female	Female	Neither	Neither	Neither	Female	Female	Neither
FBgn0026056	Rlip	NO	0	0	2	0	2	NO	NO	NO	NO	NA	NO	4	Female	Female	Neither	Neither	Neither	Neither	Neither	Neither	Neither
FBgn0035280	Cpr62Bb	NO	0	0	8	0	8	NO	NO	NO	NO	NA	NO	0	Female	Female	Female	Neither	Female	Female	Female	Female	Female
FBgn0036305	CG10984	NO	0	0	4	0	4	NO	NO	NO	NO	NA	NO	4	Female	Female	Female	Neither	Neither	Neither	Neither	Neither	Female
FBgn0031762	CG9098	NO	0	0	2	0	2	NO	NO	NO	NO	NA	NO	0	Female	NA	NA	Female	NA	NA	Neither	NA	NA
FBgn0034219	mthl4	NO	0	0	3	0	3	NO	NO	NO	NO	NA	NO	4	Neither	Neither	Neither	Female	Female	Female	Neither	Neither	Neither
FBgn0000083	AnxB9	YES	3	0	3	3	6	NO	NO	YES	NO	NA	NO	4	Both	Both	Both	Neither	Neither	Neither	Female	Female	Female
FBgn0036032	CG16711	NO	0	0	2	0	2	NO	NO	NO	NO	NA	NO	4	Neither	Female	Neither	NA	NA	NA	Neither	Neither	Female
FBgn0036288	CG10660	YES	6	0	1	6	7	NO	NO	NO	NO	NA	NO	4	Both	Both	Both	Both	Both	Both	Neither	Neither	Female
FBgn0035770	pst	NO	0	0	5	0	5	NO	NO	NO	NO	NA	NO	4	Female	Female	Female	Neither	Neither	Neither	Female	Female	Neither
FBgn0003716	tkv	NO	0	0	1	0	1	NO	NO	NO	NO	NA	NO	4	Neither	Neither	Neither	Neither	Neither	Neither	Neither	Neither	Female
FBgn0031318	CG4887	NO	0	0	8	0	8	NO	NO	NO	NO	NA	NO	4	Female	Female	Female	Female	Female	Female	Female	Female	Neither
FBgn0039827	CG1544	NO	0	0	1	0	1	NO	NO	NO	NO	NA	NO	1	Neither	NA	Neither	Neither	Neither	Neither	Neither	Female	Neither
FBgn0027950	MBD-like	NO	0	0	6	0	6	NO	NO	NO	NO	NA	NO	3	Female	Female	Female	Female	Female	Female	Neither	Neither	Neither
FBgn0266377	Pde8	YES	3	0	2	3	5	NO	NO	NO	NO	EDC	YES	4	Both	Both	Both	Neither	Neither	Neither	Female	Female	Neither
FBgn0033382	Hydr1	NO	0	0	3	0	3	NO	NO	NO	NO	NA	NO	4	Female	Female	Female	Neither	Neither	Neither	Neither	Neither	Neither
FBgn0036028	CG16717	NO	0	0	5	0	5	NO	NO	NO	NO	NA	NO	4	Female	Female	Female	NA	NA	NA	Female	Female	Neither
FBgn0266053	Patr-1	NO	0	0	3	0	3	NO	NO	NO	NO	NA	NO	4	Neither	Neither	Neither	Neither	Neither	Neither	Female	Female	Female
FBgn0032499	Uvrag	NO	0	0	4	0	4	NO	NO	NO	NO	NA	NO	4	Female	Female	Female	Neither	Neither	Neither	Neither	Neither	Female
FBgn0261618	larp	YES	3	0	5	3	8	NO	NO	NO	NO	NA	NO	4	Both	Both	Both	Female	Female	Female	Female	Female	Neither
FBgn0263144	bin3	NO	0	0	2	0	2	NO	NO	NO	NO	NA	NO	4	Female	Female	Neither	NA	NA	NA	Neither	Neither	Neither
FBgn0035916	GAPsec	NO	0	0	3	0	3	NO	NO	NO	NO	NA	NO	4	Female	Female	Female	NA	NA	NA	NA	NA	NA
FBgn0034184	CG9646	YES	3	0	0	3	3	NO	NO	NO	NO	NA	NO	4	Both	Both	Both	Neither	Neither	Neither	Neither	Neither	Neither
FBgn0036104	CG6418	NO	0	0	6	0	6	NO	NO	NO	NO	NA	NO	4	Female	Female	Female	Neither	Neither	Neither	Female	Female	Female
FBgn0030520	Pdcd4	NO	0	0	1	0	1	NO	NO	NO	NO	NA	NO	4	NA	NA	NA	NA	NA	NA	NA	NA	Female
FBgn0025725	alphaCOP	YES	6	0	3	6	9	NO	NO	YES	NO	NA	NO	4	Both	Both	Both	Both	Both	Both	Female	Female	Female
FBgn0000721	for	YES	3	0	0	3	3	NO	NO	YES	NO	NA	NO	4	Both	Both	Both	Neither	Neither	Neither	Neither	Neither	Neither
FBgn0031022	CG12204	NO	0	0	4	0	4	NO	NO	NO	NO	NA	NO	1	Female	Female	Female	NA	NA	NA	NA	NA	Female
FBgn0086707	ncm	YES	3	0	1	3	4	NO	NO	NO	NO	NA	NO	4	Neither	Neither	Neither	Both	Both	Both	Neither	Neither	Female
FBgn0035760	CG8607	NO	0	0	1	0	1	NO	NO	NO	NO	NA	NO	3	Female	Neither	Neither	Neither	Neither	Neither	Neither	Neither	Neither
FBgn0038309	Amt	NO	0	0	1	0	1	NO	NO	NO	NO	NA	NO	0	NA	Neither	Neither	NA	Female	Neither	NA	NA	Neither
FBgn0002921	Atpalpha	NO	0	0	9	0	9	NO	YES	YES	NO	NA	YES	4	Female	Female	Female	Female	Female	Female	Female	Female	Female
FBgn0260756	CG42554	NO	0	0	2	0	2	NO	NO	NO	NO	NA	NO	4	Neither	Neither	Neither	Neither	Neither	Neither	Female	Female	Neither
FBgn0034956	CG4324	YES	1	0	1	1	2	NO	NO	NO	NO	NA	NO	0	NA	Neither	NA	NA	Both	NA	Female	NA	Neither
FBgn0085451	htk	NO	0	0	1	0	1	NO	NO	NO	NO	NA	NO	4	NA	NA	NA	NA	NA	NA	Neither	Female	Neither
FBgn0286813	SRPK	NO	0	0	5	0	5	NO	NO	NO	NO	NA	NO	4	Female	Female	Female	Neither	Neither	Neither	Female	Female	Neither
FBgn0259749	mmy	NO	0	0	3	0	3	NO	NO	NO	NO	NA	NO	4	Neither	Neither	Neither	Neither	Neither	Neither	Female	Female	Female
FBgn0000279	CecC	NO	0	0	1	0	1	NO	NO	NO	NO	NA	NO	0	Neither	NA	NA	Neither	Neither	NA	Female	NA	Neither
FBgn0035766	eco	YES	6	3	3	3	9	NO	NO	NO	NO	NA	NO	4	Both	Both	Both	Male	Male	Male	Female	Female	Female
FBgn0260750	Mulk	NO	0	0	1	0	1	NO	NO	NO	NO	NA	NO	3	Neither	Neither	Neither	Neither	Neither	Neither	Neither	Neither	Female
FBgn0029736	CG4041	NO	0	0	1	0	1	NO	NO	NO	NO	NA	NO	4	NA	NA	NA	NA	NA	NA	Neither	Neither	Female
FBgn0039081	Irk2	NO	0	0	3	0	3	NO	NO	NO	NO	NA	NO	4	Female	Female	Female	Neither	Neither	Neither	Neither	Neither	NA
FBgn0033366	Ance-4	YES	3	0	4	3	7	NO	NO	NO	NO	NA	NO	0	Female	Female	Female	Both	Both	Both	NA	NA	Female
FBgn0261274	Ero1L	NO	0	0	1	0	1	NO	NO	NO	NO	NA	NO	4	Neither	Neither	Neither	Neither	Neither	Neither	Neither	Neither	Female
FBgn0028582	lqf	NO	0	0	2	0	2	NO	NO	NO	NO	SC	YES	4	Neither	Neither	Neither	Neither	Female	Female	Neither	Neither	Neither
FBgn0016078	wun	NO	0	0	5	0	5	NO	NO	NO	NO	NA	NO	4	Neither	Neither	Neither	Female	Female	Female	Female	Female	Neither
FBgn0040336	Seipin	NO	0	0	3	0	3	NO	NO	NO	NO	NA	NO	0	NA	NA	NA	NA	NA	NA	Female	Female	Female
FBgn0260742	CG12213	NO	0	0	2	0	2	NO	NO	NO	NO	NA	NO	4	Neither	Female	Female	Neither	Neither	Neither	Neither	Neither	Neither
FBgn0010482	l(2)01289	NO	0	0	1	0	1	NO	NO	NO	NO	NA	NO	4	Neither	Female	Neither	NA	NA	NA	NA	NA	Neither
FBgn0038478	cal1	NO	0	0	1	0	1	NO	NO	NO	NO	NA	NO	4	Neither	Neither	Neither	Neither	Neither	Neither	Neither	Neither	Female
FBgn0034447	CG7744	NO	0	0	2	0	2	NO	NO	NO	NO	NA	NO	3	Neither	Female	Female	NA	NA	NA	Neither	Neither	Neither
FBgn0037838	TTLL15	YES	3	0	3	3	6	NO	NO	NO	NO	NA	NO	4	Neither	Female	Neither	Both	Both	Both	Female	Neither	Female
FBgn0032135	GlcAT-S	NO	0	0	5	0	5	NO	NO	NO	NO	NA	NO	4	Female	Female	Female	Neither	Neither	Neither	Female	Female	Neither
FBgn0000253	Cam	NO	0	0	1	0	1	NO	NO	YES	NO	NA	NO	4	Neither	Neither	Neither	Neither	Neither	Female	Neither	Neither	Neither
FBgn0035229	pns	NO	0	0	9	0	9	NO	NO	NO	NO	NA	NO	4	Female	Female	Female	Female	Female	Female	Female	Female	Female
FBgn0034237	eIF3b	YES	3	0	0	3	3	NO	NO	YES	NO	NA	NO	4	Both	Both	Both	Neither	Neither	Neither	Neither	Neither	Neither
FBgn0011740	alpha-Man-IIa	NO	0	0	1	0	1	NO	NO	NO	NO	NA	NO	4	Neither	Female	Neither	Neither	Neither	Neither	Neither	Neither	Neither
FBgn0034854	Golgin245	YES	3	0	3	3	6	NO	NO	YES	NO	NA	NO	4	Both	Both	Both	Neither	Neither	Neither	Female	Female	Female
FBgn0053124	CG33124	NO	0	0	1	0	1	NO	NO	NO	NO	NA	NO	0	NA	Female	Neither	NA	Neither	Neither	Neither	NA	NA
FBgn0029906	xit	NO	0	0	6	0	6	NO	NO	NO	NO	NA	NO	4	Female	Female	Female	NA	NA	NA	Female	Female	Female
FBgn0011289	TfIIA-L	YES	3	0	3	3	6	NO	NO	NO	NO	NA	NO	4	Both	Both	Both	Neither	Neither	Neither	Female	Female	Female
FBgn0285911	Vps16A	NO	0	0	6	0	6	NO	NO	NO	NO	NA	NO	4	Female	Female	Female	Neither	Neither	Neither	Female	Female	Female
FBgn0261065	Cpsf73	YES	3	3	0	0	3	NO	NO	NO	NO	NA	NO	4	Neither	Neither	Neither	Male	Male	Male	NA	NA	Neither
FBgn0266696	Svil	YES	3	0	6	3	9	NO	NO	YES	NO	NA	NO	4	Female	Female	Female	Both	Both	Both	Female	Female	Female
FBgn0035574	RhoGEF64C	YES	2	0	1	2	3	NO	NO	NO	NO	NA	NO	0	NA	Both	NA	Neither	Both	Neither	Female	Neither	Neither
FBgn0039234	Nct	YES	3	0	0	3	3	NO	NO	NO	NO	NA	NO	4	Both	Both	Both	NA	NA	NA	Neither	Neither	Neither
FBgn0004889	tws	YES	2	0	2	2	4	NO	NO	NO	NO	SC	YES	4	Both	Both	Female	Neither	Neither	Neither	Neither	Neither	Female
FBgn0039802	dj-1beta	NO	0	0	5	0	5	NO	NO	NO	NO	NA	NO	4	Female	Female	Female	Neither	Neither	Neither	Female	Female	Neither
FBgn0031877	Hmgcl	NO	0	0	4	0	4	NO	NO	NO	NO	NA	NO	4	Female	Female	Female	Neither	Neither	Neither	Neither	Neither	Female
FBgn0032889	CG9331	NO	0	0	2	0	2	NO	NO	NO	NO	NA	NO	4	NA	NA	NA	NA	NA	NA	Female	Female	Neither
FBgn0039558	BCAS2	NO	0	0	4	0	4	NO	NO	NO	NO	NA	NO	3	Neither	Neither	Neither	Female	Female	Female	Neither	Neither	Female
FBgn0000395	cv-2	YES	4	1	0	3	4	NO	NO	NO	NO	NA	NO	4	Neither	Male	Neither	Both	Both	Both	Neither	Neither	Neither
FBgn0031818	CG9536	NO	0	0	8	0	8	NO	NO	NO	NO	NA	NO	4	Female	Female	Female	Female	Female	Female	Female	Female	Neither
FBgn0052091	CG32091	NO	0	0	7	0	7	NO	NO	NO	NO	NA	NO	4	Neither	Female	Female	Female	Female	Neither	Female	Female	Female
FBgn0015801	Reg-5	NO	0	0	1	0	1	NO	NO	NO	NO	NA	NO	4	Neither	Neither	Neither	Neither	Neither	Neither	NA	NA	Female
FBgn0034400	CG15099	YES	3	0	6	3	9	NO	NO	NO	NO	NA	NO	4	Both	Both	Both	Female	Female	Female	Female	Female	Female
FBgn0264326	PolE1	NO	0	0	2	0	2	NO	NO	NO	NO	NA	NO	1	Neither	NA	NA	Female	Female	Neither	NA	NA	NA
FBgn0038195	CG3061	YES	3	0	0	3	3	NO	NO	NO	NO	NA	NO	4	Neither	Neither	Neither	Both	Both	Both	Neither	Neither	Neither
FBgn0024944	Oamb	NO	0	0	3	0	3	NO	NO	NO	NO	NA	NO	4	Neither	Neither	Neither	Female	Female	Female	Neither	Neither	Neither
FBgn0038584	mTerf5	NO	0	0	1	0	1	NO	NO	NO	NO	NA	NO	3	Neither	Neither	Neither	Neither	Neither	Neither	Neither	Female	Neither
FBgn0038079	NijC	YES	1	0	1	1	2	NO	NO	NO	NO	NA	NO	0	Neither	Both	Female	NA	NA	NA	Neither	Neither	Neither
FBgn0031696	Bub1	NO	0	0	3	0	3	NO	NO	NO	NO	NA	NO	4	Neither	Neither	Neither	Female	Female	Female	Neither	Neither	Neither
FBgn0031773	Fbw5	NO	0	0	6	0	6	NO	NO	NO	NO	NA	NO	4	NA	NA	NA	Female	Female	Female	Female	Female	Female
FBgn0042083	Mccc2	YES	3	0	1	3	4	NO	NO	NO	NO	NA	NO	4	Both	Both	Both	NA	NA	NA	NA	NA	Female
FBgn0034139	CG4927	NO	0	0	3	0	3	NO	NO	NO	NO	NA	NO	1	NA	NA	NA	Female	Female	Neither	Female	NA	Neither
FBgn0037958	CG6962	YES	3	1	1	2	4	NO	NO	NO	NO	NA	NO	3	Both	Both	Male	Neither	Neither	Neither	Neither	Neither	Female
FBgn0034626	CG10795	NO	0	0	2	0	2	NO	NO	NO	NO	NA	NO	1	Neither	Neither	Neither	Neither	Neither	Neither	Female	Female	Neither
FBgn0004620	GluRIIA	YES	1	0	2	1	3	NO	NO	NO	NO	NA	NO	4	Female	Both	Female	Neither	Neither	Neither	Neither	Neither	Neither
FBgn0034936	Stoml2	NO	0	0	3	0	3	NO	NO	NO	NO	NA	NO	4	Neither	Neither	Neither	Neither	Neither	Neither	Female	Female	Female
FBgn0038586	CG7168	YES	3	3	0	0	3	NO	NO	NO	NO	NA	NO	3	Neither	Neither	Neither	Male	Male	Male	Neither	Neither	Neither
FBgn0034351	rswl	NO	0	0	1	0	1	NO	NO	NO	NO	NA	NO	4	Neither	Neither	Neither	Neither	Neither	Neither	Neither	Neither	Female
FBgn0287828	Pkcdelta	NO	0	0	1	0	1	NO	NO	NO	NO	NA	NO	4	NA	NA	NA	NA	NA	NA	Neither	Neither	Female
FBgn0028497	Mtmr6	NO	0	0	6	0	6	NO	NO	NO	NO	NA	NO	4	Neither	Neither	Neither	Female	Female	Female	Female	Female	Female
FBgn0031390	tho2	NO	0	0	2	0	2	NO	NO	NO	NO	NA	NO	4	Neither	Neither	Neither	Neither	Neither	Neither	Female	Female	Neither
FBgn0053505	U3-55K	NO	0	0	4	0	4	NO	NO	NO	NO	NA	NO	0	Neither	Neither	Neither	Female	Female	Female	Neither	Neither	Female
FBgn0004885	tok	NO	0	0	1	0	1	NO	NO	NO	NO	NA	NO	4	NA	NA	NA	NA	NA	NA	NA	NA	Female
FBgn0287204	Cog8	YES	3	0	1	3	4	NO	NO	NO	NO	NA	NO	4	Both	Both	Both	Neither	Neither	Neither	NA	NA	Female
FBgn0037719	bocks	YES	3	0	0	3	3	NO	NO	NO	NO	NA	NO	4	Neither	Neither	Neither	Both	Both	Both	Neither	Neither	Neither
FBgn0004406	PolG1	NO	0	0	3	0	3	NO	NO	NO	NO	NA	NO	1	Neither	Neither	NA	Female	Female	Female	NA	NA	Neither
FBgn0061469	Ube3a	NO	0	0	5	0	5	NO	NO	NO	NO	NA	NO	4	Female	Female	Neither	Female	Female	Female	Neither	Neither	Neither
FBgn0263697	Uba3	YES	6	0	2	6	8	NO	NO	NO	NO	NA	NO	4	Both	Both	Both	Both	Both	Both	Female	Female	NA
FBgn0265464	Traf6	NO	0	0	3	0	3	NO	NO	NO	NO	NA	NO	4	NA	NA	NA	NA	NA	NA	Female	Female	Female
FBgn0264324	spg	NO	0	0	2	0	2	NO	NO	NO	NO	NA	NO	4	Neither	Female	Neither	Neither	Female	Neither	NA	NA	Neither
FBgn0016081	fry	NO	0	0	5	0	5	NO	NO	NO	NO	NA	NO	4	Female	Female	Female	Neither	Neither	Neither	Neither	Female	Female
FBgn0260442	rhea	NO	0	0	9	0	9	NO	NO	YES	NO	NA	NO	4	Female	Female	Female	Female	Female	Female	Female	Female	Female
FBgn0036818	CG14074	NO	0	0	8	0	8	NO	NO	NO	NO	NA	NO	2	Female	Female	Female	Female	Female	Female	Female	Female	Neither
FBgn0022702	Cht2	NO	0	0	1	0	1	NO	NO	NO	NO	NA	NO	0	NA	Neither	Neither	Neither	Neither	Female	Neither	Neither	Neither
FBgn0000064	Ald1	YES	1	0	4	1	5	NO	NO	YES	NO	NA	NO	4	Female	Both	Female	Neither	Neither	Neither	Female	Female	Neither
FBgn0028916	CG33090	NO	0	0	6	0	6	NO	NO	NO	NO	NA	NO	4	Female	Female	Female	Female	Female	Female	Neither	Neither	Neither
FBgn0000228	Bsg25D	NO	0	0	1	0	1	NO	NO	NO	NO	NA	NO	4	Neither	Female	Neither	Neither	Neither	Neither	Neither	Neither	Neither
FBgn0029118	ScsbetaG	YES	3	0	0	3	3	NO	NO	NO	NO	NA	NO	3	Both	Both	Both	Neither	Neither	Neither	Neither	Neither	Neither
FBgn0031805	Nepl4	NO	0	0	8	0	8	NO	NO	NO	NO	NA	NO	1	Female	Female	NA	Female	Female	Female	Female	Female	Female
FBgn0031562	CG3604	YES	3	0	0	3	3	NO	NO	NO	NO	NA	NO	1	Neither	Neither	Neither	Both	Both	Both	Neither	Neither	Neither
FBgn0032010	CG8086	NO	0	0	5	0	5	NO	NO	YES	NO	NA	NO	4	Female	Female	Female	Neither	Neither	Neither	Female	Female	Neither
FBgn0005771	noc	NO	0	0	9	0	9	NO	NO	NO	NO	NA	NO	4	Female	Female	Female	Female	Female	Female	Female	Female	Female
FBgn0040321	GNBP3	NO	0	0	3	0	3	NO	NO	NO	NO	NA	NO	1	Female	Female	Female	Neither	Neither	Neither	Neither	Neither	Neither
FBgn0039017	CG6985	NO	0	0	4	0	4	NO	NO	NO	NO	NA	NO	2	Neither	Female	NA	Female	Female	Neither	Female	Neither	Neither
FBgn0031313	CG5080	YES	2	0	1	2	3	NO	NO	NO	NO	NA	NO	3	Neither	Neither	Neither	Both	Both	Female	Neither	Neither	Neither
FBgn0260399	gwl	NO	0	0	3	0	3	NO	NO	NO	NO	NA	NO	0	NA	NA	NA	Female	Female	Female	NA	NA	NA
FBgn0030806	CG13001	NO	0	0	1	0	1	NO	NO	NO	NO	NA	NO	1	NA	Neither	NA	NA	Neither	NA	Female	NA	NA
FBgn0039479	CG14257	NO	0	0	6	0	6	NO	NO	NO	NO	NA	NO	0	Neither	Female	NA	Female	Female	Female	Female	Female	Neither
FBgn0036773	CG13698	YES	6	0	1	6	7	NO	NO	NO	NO	NA	NO	4	Both	Both	Both	Both	Both	Both	Neither	Neither	Female
FBgn0037344	CG2926	NO	0	0	5	0	5	NO	NO	NO	NO	NA	NO	4	Female	Female	Neither	Female	Female	Female	Neither	Neither	Neither
FBgn0040389	mRpL14	NO	0	0	1	0	1	NO	NO	NO	NO	NA	NO	4	NA	NA	NA	NA	NA	NA	Neither	Neither	Female
FBgn0033205	CG2064	YES	3	0	2	3	5	NO	NO	NO	NO	NA	NO	4	Both	Both	Both	Neither	Neither	NA	Female	Female	Neither
FBgn0261439	SdhA	NO	0	0	6	0	6	NO	NO	YES	NO	NA	NO	4	Female	Female	Female	Neither	Neither	Neither	Female	Female	Female
FBgn0261041	stj	NO	0	0	1	0	1	NO	NO	NO	NO	NA	NO	1	NA	Neither	NA	NA	Neither	NA	Female	NA	NA
FBgn0033388	CG8046	NO	0	0	1	0	1	NO	NO	NO	NO	NA	NO	1	NA	Neither	NA	NA	Female	NA	Neither	NA	NA
FBgn0027356	Amph	NO	0	0	3	0	3	NO	NO	NO	NO	NA	NO	4	Neither	Neither	Neither	Neither	Neither	Neither	Female	Female	Female
FBgn0038535	alt	NO	0	0	2	0	2	NO	NO	NO	NO	NA	NO	4	Neither	Neither	Neither	Neither	Neither	Neither	Female	Female	Neither
FBgn0250786	Chd1	YES	3	0	4	3	7	NO	NO	NO	NO	NA	NO	4	Both	Both	Both	Female	Female	Female	NA	NA	Female
FBgn0034985	CG3328	YES	3	0	2	3	5	NO	NO	NO	NO	NA	NO	4	Neither	Both	Female	Female	Both	Both	Neither	NA	NA
FBgn0031918	CG6055	NO	0	0	3	0	3	NO	NO	YES	NO	NA	NO	4	Neither	Neither	Neither	Female	Female	Female	Neither	Neither	Neither
FBgn0267823	Gmer	YES	2	0	2	2	4	NO	NO	NO	NO	NA	NO	4	Both	Female	Both	NA	NA	NA	NA	NA	Female
FBgn0036282	Smyd4-2	NO	0	0	4	0	4	NO	NO	NO	NO	NA	NO	2	Neither	Female	Neither	Female	Female	NA	Female	Neither	Neither
FBgn0261270	Sps1	NO	0	0	1	0	1	NO	NO	NO	NO	NA	NO	4	Neither	Neither	Neither	Neither	Neither	Neither	NA	NA	Female
FBgn0031529	CG9662	YES	6	0	2	6	8	NO	NO	NO	NO	NA	NO	4	Both	Both	Both	Both	Both	Both	Female	Female	Neither
FBgn0011230	poe	YES	6	0	3	6	9	NO	NO	YES	NO	NA	NO	4	Both	Both	Both	Both	Both	Both	Female	Female	Female
FBgn0036038	defl	NO	0	0	6	0	6	NO	NO	NO	NO	NA	NO	4	Female	Female	Female	Neither	Neither	Neither	Female	Female	Female
FBgn0265262	Vha68-1	YES	1	1	0	0	1	NO	NO	YES	NO	NA	NO	4	Neither	Male	Neither	Neither	Neither	Neither	Neither	Neither	Neither
FBgn0036772	CG5290	NO	0	0	1	0	1	NO	NO	NO	NO	NA	NO	4	Neither	Neither	Neither	Neither	Neither	Neither	Neither	Female	Neither
FBgn0032836	CG10680	YES	1	0	2	1	3	NO	NO	NO	NO	NA	NO	4	Neither	Neither	Neither	Female	Both	Female	Neither	Neither	Neither
FBgn0011236	ken	YES	3	0	0	3	3	NO	NO	NO	NO	NA	NO	4	NA	NA	NA	Both	Both	Both	NA	NA	NA
FBgn0261786	mi	NO	0	0	2	0	2	NO	NO	NO	NO	NA	NO	4	Neither	Neither	Neither	Neither	Neither	Neither	Female	Female	NA
FBgn0036147	Plod	YES	2	2	3	0	5	NO	NO	NO	NO	NA	NO	4	Female	Female	Female	Male	Male	Neither	Neither	Neither	Neither
FBgn0034172	CG6665	YES	3	0	6	3	9	NO	NO	NO	NO	NA	NO	4	Both	Both	Both	Female	Female	Female	Female	Female	Female
FBgn0261276	Opa1	YES	1	0	7	1	8	NO	NO	YES	NO	NA	NO	4	Female	Both	Female	Female	Female	Female	Female	Female	Neither
FBgn0020440	Fak	YES	6	1	1	5	7	NO	NO	NO	NO	NA	NO	4	Both	Both	Both	Male	Both	Both	Neither	Neither	Female
FBgn0034631	TAF1C-like	YES	6	0	2	6	8	NO	NO	NO	NO	NA	NO	3	Both	Both	Both	Both	Both	Both	Female	Female	Neither
FBgn0020236	ATPCL	NO	0	0	3	0	3	NO	NO	YES	NO	NA	NO	4	Neither	Neither	Neither	Female	Female	Female	Neither	Neither	Neither
FBgn0038609	Nup43	NO	0	0	2	0	2	NO	NO	NO	NO	NA	NO	4	Neither	Neither	Neither	Neither	Neither	Neither	Female	Female	Neither
FBgn0050438	Ugt50B3	NO	0	0	2	0	2	NO	NO	NO	NO	MC	YES	2	Neither	Female	Female	NA	NA	NA	Neither	Neither	Neither
FBgn0033949	Had2	YES	2	0	1	2	3	NO	NO	NO	NO	NA	NO	0	Neither	Neither	NA	Both	Both	Female	Neither	Neither	Neither
FBgn0266918	CG32486	NO	0	0	3	0	3	NO	NO	NO	NO	NA	NO	4	Neither	Neither	Neither	Neither	Neither	Neither	Female	Female	Female
FBgn0038481	CG17475	NO	0	0	2	0	2	NO	NO	NO	NO	NA	NO	0	Neither	Neither	NA	NA	Female	Female	NA	NA	Neither
FBgn0275436	PheRS-m	NO	0	0	6	0	6	NO	NO	NO	NO	NA	NO	4	Female	Female	Female	Female	Female	Female	Neither	Neither	Neither
FBgn0267408	AOX1	YES	3	0	0	3	3	NO	NO	YES	NO	NA	NO	4	Neither	Neither	Neither	Both	Both	Both	NA	NA	NA
FBgn0038463	CG3534	NO	0	0	5	0	5	NO	NO	NO	NO	NA	NO	4	Female	Female	Female	Neither	Neither	Neither	Female	Female	Neither
FBgn0027948	msps	NO	0	0	6	0	6	NO	NO	YES	NO	NA	NO	4	Female	Female	Female	Female	Female	Female	Neither	Neither	Neither
FBgn0000097	aop	NO	0	0	5	0	5	NO	NO	NO	NO	NA	NO	4	Neither	Neither	Neither	Female	Female	Female	Female	Female	Neither
FBgn0038890	sp3	YES	2	2	3	0	5	NO	NO	NO	NO	NA	NO	4	Female	Female	Female	Neither	Male	Male	Neither	Neither	Neither
FBgn0026239	gukh	YES	2	0	3	2	5	NO	NO	NO	NO	NA	NO	4	Female	Neither	Female	Both	Neither	Both	NA	Neither	Female
FBgn0003209	raw	YES	3	0	3	3	6	NO	NO	NO	NO	NA	NO	4	Both	Both	Both	Female	Female	Female	Neither	Neither	Neither
FBgn0039538	CG12883	NO	0	0	3	0	3	NO	NO	NO	NO	NA	NO	4	NA	NA	NA	Female	Female	Female	NA	NA	Neither
FBgn0040227	eIF3d1	NO	0	0	4	0	4	NO	NO	NO	NO	NA	NO	4	Neither	Neither	Neither	Female	Female	Female	Neither	Neither	Female
FBgn0037332	Hcs	NO	0	0	3	0	3	NO	NO	NO	NO	NA	NO	4	Female	Female	Female	Neither	Neither	NA	Neither	Neither	Neither
FBgn0000244	by	YES	3	0	0	3	3	NO	NO	NO	NO	NA	NO	4	Neither	Neither	Neither	Both	Both	Both	Neither	Neither	Neither
FBgn0036106	CG6409	YES	6	0	3	6	9	NO	NO	NO	NO	NA	NO	4	Both	Both	Both	Both	Both	Both	Female	Female	Female
FBgn0034180	Ehbp1	YES	3	0	6	3	9	NO	NO	NO	NO	NA	NO	4	Both	Both	Both	Female	Female	Female	Female	Female	Female
FBgn0038429	CG14882	NO	0	0	5	0	5	NO	NO	NO	NO	NA	NO	4	Neither	NA	Neither	Female	Female	Female	Female	Female	Neither
FBgn0030246	CG1582	NO	0	0	4	0	4	NO	NO	NO	NO	NA	NO	4	NA	NA	NA	Female	Female	Female	NA	NA	Female
FBgn0021761	Nup154	NO	0	0	6	0	6	NO	NO	NO	NO	NA	NO	4	Female	Female	Female	Female	Female	Female	Neither	Neither	Neither
FBgn0000520	dwg	NO	0	0	3	0	3	NO	NO	NO	NO	NA	NO	4	NA	NA	NA	NA	NA	NA	Female	Female	Female
FBgn0031660	mRpL28	NO	0	0	3	0	3	NO	NO	NO	NO	NA	NO	4	Female	Female	Female	Neither	Neither	Neither	NA	NA	Neither
FBgn0004837	Su(H)	NO	0	0	2	0	2	NO	NO	NO	NO	NA	NO	3	Neither	Neither	Neither	NA	NA	NA	Female	Female	Neither
FBgn0051380	CG31380	NO	0	0	1	0	1	NO	NO	NO	NO	NA	NO	4	Female	Neither	NA	NA	NA	NA	NA	NA	NA
FBgn0030206	CG2889	NO	0	0	4	0	4	NO	NO	NO	NO	NA	NO	4	NA	NA	NA	Female	Female	Female	NA	NA	Female
FBgn0026409	Mpcp2	NO	0	0	1	0	1	NO	NO	YES	NO	NA	NO	4	Neither	Neither	Neither	NA	NA	NA	NA	NA	Female
FBgn0020620	RN-tre	YES	1	1	0	0	1	NO	NO	NO	NO	NA	NO	4	Neither	Neither	Neither	Neither	Neither	Male	Neither	Neither	Neither
FBgn0010015	CanA1	YES	3	1	2	2	5	NO	NO	NO	NO	NA	NO	1	Female	Both	NA	Male	Both	Neither	Female	Neither	Neither
FBgn0260940	lsn	YES	3	0	1	3	4	NO	NO	NO	NO	NA	NO	4	Both	Both	Both	Neither	Neither	Neither	Neither	Female	Neither
FBgn0003041	pbl	YES	3	0	3	3	6	NO	NO	NO	NO	NA	NO	4	Female	Female	Neither	Both	Both	Both	Female	NA	Neither
FBgn0003612	Su(var)2-10	NO	0	0	1	0	1	NO	NO	NO	NO	NA	NO	4	Neither	Female	Neither	NA	NA	NA	Neither	Neither	NA
FBgn0262081	Csk	NO	0	0	1	0	1	NO	NO	NO	NO	NA	NO	4	Neither	Female	Neither	Neither	Neither	Neither	NA	NA	NA
FBgn0263106	DnaJ-1	YES	2	2	1	0	3	NO	NO	NO	NO	NA	NO	4	Neither	Neither	Neither	Male	Male	Female	Neither	Neither	Neither
FBgn0026418	Hsc70Cb	YES	1	0	5	1	6	NO	NO	YES	NO	SC	YES	4	Both	Female	Female	Female	Female	Female	Neither	Neither	Neither
FBgn0017561	Ork1	NO	0	0	4	0	4	NO	NO	NO	NO	NA	NO	0	NA	NA	NA	Female	Female	Female	NA	NA	Female
FBgn0035148	CG3402	YES	2	0	1	2	3	NO	NO	NO	NO	NA	NO	3	Neither	Neither	Neither	Female	Both	Both	Neither	Neither	Neither
FBgn0034063	CG8389	YES	3	0	1	3	4	NO	NO	NO	NO	NA	NO	4	Both	Both	Both	Neither	Neither	Neither	NA	NA	Female
FBgn0027073	Ugt49B1	NO	0	0	5	0	5	NO	NO	NO	NO	NA	NO	4	Neither	Neither	Neither	Female	Female	Female	Female	Female	Neither
FBgn0039348	Npl4	YES	3	0	1	3	4	NO	NO	NO	NO	NA	NO	4	Both	Both	Both	NA	NA	NA	Female	Neither	Neither
FBgn0039830	ATPsynC	YES	3	3	1	0	4	NO	NO	NO	NO	NA	NO	4	Neither	Female	Neither	Male	Male	Male	Neither	Neither	Neither
FBgn0014877	Roe1	NO	0	0	1	0	1	NO	NO	NO	NO	NA	NO	4	Neither	Neither	Neither	Neither	Neither	Neither	Neither	Neither	Female
FBgn0027528	goe	NO	0	0	1	0	1	NO	NO	NO	NO	NA	NO	4	Neither	Neither	Neither	Neither	Neither	Neither	Neither	Neither	Female
FBgn0038649	PGS1	NO	0	0	3	0	3	NO	NO	NO	NO	NA	NO	2	Female	Female	Female	Neither	Neither	Neither	Neither	Neither	Neither
FBgn0286511	Pld	NO	0	0	1	0	1	NO	NO	NO	NO	NA	NO	4	Neither	Neither	Neither	Neither	Neither	Neither	NA	NA	Female
FBgn0039836	CG1750	NO	0	0	8	0	8	NO	NO	NO	NO	NA	NO	1	Female	Female	Female	Female	Female	Female	Female	Female	NA
FBgn0029932	CG4607	NO	0	0	1	0	1	NO	NO	NO	NO	NA	NO	4	NA	NA	NA	NA	NA	NA	NA	NA	Female
FBgn0036152	Dyro	NO	0	0	4	0	4	NO	NO	NO	NO	NA	NO	4	Neither	Neither	Neither	Female	Female	Female	Neither	Neither	Female
FBgn0038897	CG5849	NO	0	0	1	0	1	NO	NO	NO	NO	NA	NO	1	Neither	Neither	NA	Neither	Neither	Neither	NA	NA	Female
FBgn0036688	Fit2	YES	4	1	2	3	6	NO	NO	NO	NO	NA	NO	4	Female	Both	Female	Male	Both	Both	Neither	Neither	NA
FBgn0037074	Tbc1d8-9	NO	0	0	2	0	2	NO	NO	NO	NO	NA	NO	4	Neither	Neither	Neither	NA	NA	NA	Female	Female	Neither
FBgn0038682	CG5835	NO	0	0	4	0	4	NO	NO	NO	NO	NA	NO	3	Neither	Female	Female	Neither	Female	Female	Neither	Neither	Neither
FBgn0025866	CalpB	NO	0	0	3	0	3	NO	NO	NO	NO	NA	NO	4	Neither	Neither	Neither	Neither	Neither	Neither	Female	Female	Female
FBgn0036107	galla-2	YES	3	3	6	0	9	NO	NO	NO	NO	NA	NO	4	Female	Female	Female	Male	Male	Male	Female	Female	Female
FBgn0032775	CG17544	YES	2	2	2	0	4	NO	NO	NO	NO	NA	NO	4	NA	NA	NA	Neither	Male	Male	Female	Female	Neither
FBgn0034432	CG7461	YES	8	1	1	7	9	NO	NO	YES	NO	NA	NO	4	Both	Both	Both	Male	Both	Both	Both	Both	Female
FBgn0032733	CG15170	YES	2	0	0	2	2	NO	NO	NO	NO	NA	NO	0	NA	NA	NA	NA	Both	Both	NA	NA	NA
FBgn0034707	MED16	NO	0	0	2	0	2	NO	NO	NO	NO	NA	NO	2	NA	NA	NA	NA	NA	NA	Female	Female	Neither
FBgn0021872	Xbp1	YES	3	0	6	3	9	NO	NO	NO	NO	NA	NO	4	Female	Female	Female	Both	Both	Both	Female	Female	Female
FBgn0033755	ClC-b	NO	0	0	2	0	2	NO	NO	NO	NO	NA	NO	4	Neither	Neither	Neither	Neither	Neither	Neither	Female	Female	Neither
FBgn0038716	CG7342	NO	0	0	2	0	2	NO	NO	NO	NO	EDC	YES	4	Neither	Female	NA	NA	NA	NA	Female	NA	NA
FBgn0031144	CG1529	NO	0	0	1	0	1	NO	NO	NO	NO	NA	NO	4	NA	NA	NA	NA	NA	NA	NA	NA	Female
FBgn0012058	Cdc27	YES	3	3	0	0	3	NO	NO	NO	NO	NA	NO	4	Neither	Neither	Neither	Male	Male	Male	Neither	Neither	Neither
FBgn0040080	pins	NO	0	0	5	0	5	NO	NO	NO	NO	NA	NO	4	Neither	Neither	Neither	Female	Female	Female	Female	Female	Neither
FBgn0041582	tamo	YES	2	0	5	2	7	NO	NO	NO	NO	NA	NO	4	Neither	Female	Neither	Female	Both	Both	Female	Female	Female
FBgn0037556	CG9636	NO	0	0	3	0	3	NO	NO	NO	NO	NA	NO	4	Female	Female	Female	NA	NA	NA	NA	NA	Neither
FBgn0262619	DNAlig1	YES	2	0	1	2	3	NO	NO	NO	NO	NA	NO	1	NA	NA	NA	Both	Both	Female	NA	NA	NA
FBgn0034433	EndoB	YES	3	3	0	0	3	NO	NO	NO	NO	NA	NO	2	Neither	Neither	Neither	Male	Male	Male	Neither	Neither	Neither
FBgn0262937	Rabex-5	YES	3	0	2	3	5	NO	NO	NO	NO	NA	NO	4	Neither	Neither	Neither	Both	Both	Both	Female	Female	Neither
FBgn0024947	NTPase	NO	0	0	4	0	4	NO	NO	NO	NO	NA	NO	4	Female	Female	Female	Neither	Neither	Female	Neither	Neither	Neither
FBgn0019949	Cdk9	YES	1	1	4	0	5	NO	NO	NO	NO	NA	NO	4	Female	Female	Female	Neither	Male	Neither	Neither	Neither	Female
FBgn0039620	wat	YES	2	0	1	2	3	NO	NO	NO	NO	NA	NO	3	Neither	Neither	Neither	Both	Female	Both	Neither	Neither	Neither
FBgn0039324	CG10553	NO	0	0	1	0	1	NO	NO	NO	NO	NA	NO	4	Neither	Female	Neither	NA	NA	NA	Neither	Neither	Neither
FBgn0034243	Ns2	YES	3	0	1	3	4	NO	NO	NO	NO	NA	NO	4	Neither	Neither	Neither	Both	Both	Both	NA	NA	Female
FBgn0039626	Slu7	NO	0	0	3	0	3	NO	NO	NO	NO	NA	NO	4	Neither	Neither	Neither	Female	Female	Female	Neither	Neither	Neither
FBgn0011704	RnrS	NO	0	0	1	0	1	NO	NO	NO	NO	NA	NO	4	NA	NA	NA	Female	Neither	Neither	NA	Neither	NA
FBgn0013733	shot	YES	6	0	3	6	9	NO	NO	YES	NO	NA	NO	4	Both	Both	Both	Both	Both	Both	Female	Female	Female
FBgn0035878	CG7182	NO	0	0	3	0	3	NO	NO	NO	NO	NA	NO	4	Female	Female	Female	NA	NA	NA	Neither	Neither	NA
FBgn0085408	Shrm	NO	0	0	4	0	4	NO	NO	NO	NO	NA	NO	4	Female	Female	Female	Neither	Neither	Neither	Neither	Neither	Female
FBgn0038683	CG11779	NO	0	0	3	0	3	NO	NO	NO	NO	NA	NO	4	Female	Female	Female	Neither	Neither	Neither	Neither	Neither	Neither
FBgn0028496	CG30116	YES	3	2	4	1	7	NO	NO	NO	NO	NA	NO	4	Female	Female	Both	Male	Neither	Male	Neither	Female	Female
FBgn0262475	bru2	NO	0	0	3	0	3	NO	YES	NO	NO	NA	YES	4	Neither	Neither	Neither	Female	Female	Female	Neither	Neither	Neither
FBgn0026378	Rep	NO	0	0	1	0	1	NO	NO	NO	NO	NA	NO	4	Neither	Neither	Neither	Neither	Neither	Neither	Neither	Neither	Female
FBgn0035713	velo	NO	0	0	4	0	4	NO	NO	YES	NO	NA	NO	4	Neither	Neither	Neither	Female	Female	Female	Neither	Neither	Female
FBgn0030932	Ggt-1	NO	0	0	2	0	2	YES	NO	NO	NO	MC	NO	4	NA	NA	NA	NA	NA	NA	Female	Female	Neither
FBgn0031397	CG15385	NO	0	0	2	0	2	NO	NO	NO	NO	NA	NO	4	Neither	Neither	Neither	Neither	Neither	Neither	Female	Female	Neither
FBgn0028490	CG31705	YES	4	1	0	3	4	NO	NO	NO	NO	NA	NO	4	Both	Both	Both	Male	Neither	Neither	Neither	Neither	Neither
FBgn0027080	TyrRS	YES	3	0	3	3	6	NO	NO	NO	NO	NA	NO	4	Both	Both	Both	Female	Female	Female	Neither	Neither	Neither
FBgn0037265	spartin	NO	0	0	2	0	2	NO	NO	NO	NO	NA	NO	4	Neither	Neither	Neither	Neither	Neither	Neither	Female	Female	Neither
FBgn0011836	Taf2	NO	0	0	8	0	8	NO	NO	NO	NO	NA	NO	4	Female	Female	Female	Female	Female	Female	Female	Female	Neither
FBgn0260012	pds5	NO	0	0	5	0	5	NO	NO	NO	NO	NA	NO	4	Female	Female	Female	Neither	Neither	Neither	Female	Female	Neither
FBgn0033739	Dyb	NO	0	0	6	0	6	NO	NO	NO	NO	NA	NO	4	Female	Female	Female	Female	Female	Female	Neither	Neither	Neither
FBgn0034802	CNBP	NO	0	0	6	0	6	NO	NO	YES	NO	NA	NO	4	Female	Female	Female	Female	Female	Female	Neither	Neither	Neither
FBgn0033313	Cirl	NO	0	0	9	0	9	NO	NO	NO	NO	NA	NO	4	Female	Female	Female	Female	Female	Female	Female	Female	Female
FBgn0036697	rogdi	NO	0	0	4	0	4	NO	NO	NO	NO	NA	NO	4	Neither	Neither	Neither	Female	Female	Female	Female	Neither	Neither
FBgn0266671	Sec6	YES	3	0	2	3	5	NO	NO	NO	NO	NA	NO	3	Both	Both	Both	Neither	Neither	Neither	Female	Female	Neither
FBgn0039016	Dcr-1	NO	0	0	5	0	5	NO	NO	NO	NO	NA	NO	4	Female	Neither	Female	Female	Female	Female	Neither	Neither	Neither
FBgn0052082	IRSp53	YES	2	2	3	0	5	NO	NO	YES	NO	NA	NO	4	Female	Female	Female	Male	NA	Male	Neither	Neither	Neither
FBgn0265002	CG44153	NO	0	0	1	0	1	NO	NO	NO	NO	NA	NO	0	NA	Neither	NA	NA	Neither	NA	Female	NA	NA
FBgn0051151	wge	NO	0	0	7	0	7	NO	NO	NO	NO	NA	NO	4	Female	Female	Female	Female	Female	Female	Neither	Neither	Female
FBgn0032017	CG7810	NO	0	0	1	0	1	NO	NO	NO	NO	NA	NO	3	NA	NA	NA	Neither	Neither	Neither	Neither	Neither	Female
FBgn0029975	spidey	NO	0	0	2	0	2	NO	NO	NO	NO	NA	NO	4	Neither	Neither	Neither	NA	NA	NA	Female	Female	Neither
FBgn0019982	Gs1l	NO	0	0	4	0	4	NO	NO	NO	NO	NA	NO	4	Female	Female	Female	NA	NA	NA	Neither	Neither	Female
FBgn0028684	Rpt5	NO	0	0	6	0	6	NO	NO	NO	NO	NA	NO	4	Neither	Neither	Neither	Female	Female	Female	Female	Female	Female
FBgn0039203	CG13618	YES	2	0	1	2	3	NO	NO	NO	NO	NA	NO	0	Both	Both	Female	NA	NA	NA	Neither	Neither	Neither
FBgn0039821	CG15556	NO	0	0	6	0	6	NO	NO	NO	NO	NA	NO	4	Female	Female	Female	Female	Female	Female	Neither	Neither	NA
FBgn0028962	AlaRS-m	YES	3	0	4	3	7	NO	NO	NO	NO	NA	NO	4	Female	Female	Female	Both	Both	Both	Neither	Neither	Female
FBgn0052196	CG32196	NO	0	0	3	0	3	NO	NO	NO	NO	NA	NO	0	Neither	Neither	Neither	NA	NA	NA	Female	Female	Female
FBgn0283478	und	NO	0	0	6	0	6	NO	NO	NO	NO	NA	NO	4	Female	Female	Female	Female	Female	Female	NA	NA	NA
FBgn0031876	Atac1	NO	0	0	3	0	3	NO	NO	NO	NO	NA	NO	4	Female	Female	Female	NA	NA	NA	Neither	Neither	Neither
FBgn0067102	GlcT	YES	3	0	5	3	8	NO	NO	NO	NO	NA	NO	4	Both	Both	Both	Female	Female	Female	Female	Female	Neither
FBgn0037801	CG3999	NO	0	0	2	0	2	NO	NO	NO	NO	NA	NO	0	Female	Neither	NA	Female	Neither	Neither	Neither	Neither	Neither
FBgn0038860	Ice2	NO	0	0	3	0	3	NO	NO	NO	NO	NA	NO	3	Neither	Neither	Neither	Female	Female	Female	Neither	Neither	NA
FBgn0039135	CG13603	NO	0	0	4	0	4	NO	NO	NO	NO	NA	NO	4	Neither	Neither	Neither	Female	Female	Female	Neither	Neither	Female
FBgn0031516	CG9663	NO	0	0	3	0	3	NO	NO	NO	NO	NA	NO	2	NA	Neither	Neither	Neither	Neither	Neither	Female	Female	Female
FBgn0034479	CG8654	YES	2	0	3	2	5	NO	NO	YES	NO	NA	NO	4	Both	Both	Female	Neither	Neither	Neither	Female	Female	Neither
FBgn0013746	alien	NO	0	0	2	0	2	NO	NO	NO	NO	NA	NO	4	Neither	Neither	Neither	Female	Neither	Female	Neither	Neither	Neither
FBgn0011202	dia	NO	0	0	2	0	2	NO	NO	NO	NO	NA	NO	4	NA	NA	NA	NA	NA	NA	Female	Female	Neither
FBgn0026189	promL	NO	0	0	2	0	2	NO	NO	YES	NO	NA	NO	4	Neither	NA	NA	Female	Female	Neither	Neither	Neither	Neither
FBgn0026718	Agpat2	NO	0	0	6	0	6	NO	NO	NO	NO	NA	NO	4	Neither	Neither	Neither	Female	Female	Female	Female	Female	Female
FBgn0035591	CG4611	YES	2	2	0	0	2	NO	NO	NO	NO	NA	NO	3	Male	Male	Neither	Neither	Neither	Neither	NA	NA	Neither
FBgn0034230	CG4853	YES	3	0	0	3	3	NO	NO	NO	NO	NA	NO	4	Both	Both	Both	Neither	Neither	Neither	Neither	Neither	Neither
FBgn0003891	tud	NO	0	0	2	0	2	NO	NO	NO	NO	NA	NO	4	Neither	Neither	Neither	Neither	Neither	Neither	Female	Female	Neither
FBgn0262111	f	YES	1	1	2	0	3	NO	NO	NO	NO	NA	NO	0	NA	Female	NA	NA	Male	NA	Female	NA	NA
FBgn0034903	sona	YES	1	0	5	1	6	NO	NO	NO	NO	NA	NO	0	Female	Female	NA	Female	Both	Female	Female	Neither	Neither
FBgn0003396	shn	NO	0	0	3	0	3	NO	NO	NO	NO	NA	NO	4	NA	NA	NA	Neither	Neither	Neither	Female	Female	Female
FBgn0034627	eEFSec	NO	0	0	2	0	2	NO	NO	NO	NO	NA	NO	2	Neither	Neither	Neither	Neither	Neither	Neither	Female	Female	Neither
FBgn0034728	rad50	YES	3	0	0	3	3	NO	NO	NO	NO	NA	NO	4	Both	Both	Both	Neither	Neither	Neither	Neither	Neither	Neither
FBgn0033735	Dera	NO	0	0	3	0	3	NO	NO	YES	NO	NA	NO	2	Female	Female	Female	Neither	Neither	Neither	Neither	Neither	NA
FBgn0027579	mino	NO	0	0	1	0	1	NO	NO	NO	NO	NA	NO	4	Neither	Neither	Neither	Neither	Neither	Neither	Neither	Neither	Female
FBgn0034569	dgt3	NO	0	0	1	0	1	NO	NO	NO	NO	NA	NO	2	Neither	Neither	NA	NA	NA	NA	Neither	NA	Female
FBgn0031882	Rab30	NO	0	0	4	0	4	NO	NO	NO	NO	NA	NO	4	Neither	Neither	Neither	Female	Female	Female	Neither	Neither	Female
FBgn0037536	CG2698	NO	0	0	1	0	1	NO	NO	NO	NO	NA	NO	4	Neither	Neither	Neither	Neither	Neither	Neither	Neither	Neither	Female
FBgn0261671	tweek	NO	0	0	4	0	4	NO	NO	NO	NO	NA	NO	4	NA	NA	NA	Female	Female	Female	NA	NA	Female
FBgn0263396	sqd	YES	3	0	2	3	5	NO	NO	NO	NO	NA	NO	4	Both	Both	Both	Neither	Neither	Neither	Female	Female	Neither
FBgn0032475	Sfmbt	NO	0	0	3	0	3	NO	NO	NO	NO	NA	NO	4	Neither	Neither	Neither	Female	Female	Female	Neither	Neither	Neither
FBgn0029174	Fkbp59	NO	0	0	8	0	8	NO	NO	NO	NO	NA	NO	4	Female	Female	Female	Female	Female	Female	Female	Female	Neither
FBgn0051635	CG31635	NO	0	0	2	0	2	NO	NO	NO	NO	NA	NO	4	Neither	Neither	Neither	Neither	Female	Female	Neither	Neither	Neither
FBgn0052113	Vps13D	NO	0	0	5	0	5	NO	NO	YES	NO	NA	NO	4	Female	Female	Neither	Female	Female	Female	Neither	Neither	Neither
FBgn0029979	mahe	NO	0	0	1	0	1	NO	NO	NO	NO	NA	NO	4	Neither	Neither	Neither	NA	NA	NA	NA	Neither	Female
FBgn0036514	CG12301	NO	0	0	6	0	6	NO	NO	NO	NO	NA	NO	1	Female	Female	Female	Female	Female	Female	NA	NA	Neither
FBgn0040765	luna	NO	0	0	1	0	1	NO	NO	NO	NO	NA	NO	4	Neither	Neither	Neither	Neither	Neither	Neither	Neither	Neither	Female
FBgn0030638	CG11655	NO	0	0	4	0	4	NO	NO	NO	NO	NA	NO	4	Female	Female	Female	NA	NA	NA	Neither	Female	NA
FBgn0263390	Nha2	NO	0	0	3	0	3	NO	NO	NO	NO	NA	NO	4	Neither	Neither	Neither	Female	Female	Female	Neither	Neither	Neither
FBgn0285955	cv-c	YES	2	0	6	2	8	NO	NO	NO	NO	NA	NO	4	Both	Both	Female	Neither	Female	Female	Female	Female	Female
FBgn0037720	CG8312	YES	3	0	2	3	5	NO	NO	NO	NO	EDC	YES	4	Neither	Neither	Neither	Both	Both	Both	Female	Female	Neither
FBgn0051216	Naam	NO	0	0	1	0	1	NO	NO	NO	NO	NA	NO	4	Neither	Neither	Neither	Neither	Neither	Neither	NA	NA	Female
FBgn0034025	Pgant1	YES	3	0	4	3	7	NO	NO	NO	NO	NA	NO	4	Both	Both	Both	Female	Female	Female	Neither	Neither	Female
FBgn0266411	sima	NO	0	0	1	0	1	NO	NO	NO	NO	NA	NO	4	Neither	Neither	Neither	Neither	Neither	Neither	Neither	Neither	Female
FBgn0031883	Caper	NO	0	0	7	0	7	NO	NO	NO	NO	NA	NO	4	Female	Neither	Neither	Female	Female	Female	Female	Female	Female
FBgn0005659	Ets98B	NO	0	0	3	0	3	NO	NO	NO	NO	NA	NO	1	NA	NA	NA	Female	Female	Female	Neither	Neither	Neither
FBgn0085427	CG34398	YES	3	0	4	3	7	NO	NO	NO	NO	NA	NO	1	Female	Female	Female	Both	Both	Both	Female	Neither	Neither
FBgn0015295	Shark	YES	2	0	5	2	7	NO	NO	NO	NO	NA	NO	4	Female	Female	Female	Female	Both	Both	Neither	Neither	Female
FBgn0262733	Src64B	YES	3	0	4	3	7	NO	NO	NO	NO	NA	NO	4	Female	Female	Female	Both	Both	Both	Neither	Neither	Female
FBgn0036364	CG14109	NO	0	0	8	0	8	NO	NO	NO	NO	NA	NO	4	Female	Female	Female	Female	Female	Female	Female	Female	Neither
FBgn0014396	tim	YES	6	0	3	6	9	NO	NO	NO	NO	NA	NO	4	Both	Both	Both	Both	Both	Both	Female	Female	Female
FBgn0036666	TSG101	YES	3	0	0	3	3	NO	NO	NO	NO	NA	NO	4	NA	NA	NA	Both	Both	Both	NA	NA	NA
FBgn0039631	Sirt7	NO	0	0	1	0	1	NO	NO	NO	NO	NA	NO	2	Neither	NA	NA	NA	Neither	Neither	NA	Neither	Female
FBgn0034733	CG4752	YES	5	0	3	5	8	NO	NO	NO	NO	NA	NO	4	Both	Female	Both	Both	Both	Both	Female	Female	Neither
FBgn0086706	pix	YES	3	3	2	0	5	NO	NO	NO	NO	NA	NO	4	Neither	Neither	Neither	Male	Male	Male	Female	Female	Neither
FBgn0030403	CG1824	NO	0	0	1	0	1	NO	NO	NO	NO	NA	NO	4	NA	NA	NA	NA	NA	NA	Neither	Neither	Female
FBgn0002775	msl-3	YES	3	3	0	0	3	NO	NO	NO	NO	NA	NO	2	NA	NA	NA	Male	Male	Male	Neither	Neither	Neither
FBgn0003977	vir	NO	0	0	3	0	3	NO	NO	NO	NO	NA	NO	4	Neither	Female	Neither	Neither	Female	Female	Neither	Neither	Neither
FBgn0259678	sqa	YES	1	0	2	1	3	NO	NO	NO	NO	NA	NO	4	Neither	Female	Neither	Neither	Both	Neither	Female	Neither	Neither
FBgn0035917	Zasp66	NO	0	0	3	0	3	NO	NO	YES	NO	NA	NO	4	Female	Female	Female	Neither	Neither	Neither	Neither	Neither	Neither
FBgn0050389	CG30389	YES	2	0	6	2	8	NO	NO	YES	NO	NA	NO	4	Both	Both	Female	Female	Female	Female	Neither	Female	Female
FBgn0052112	CG32112	NO	0	0	2	0	2	NO	NO	NO	NO	NA	NO	4	Neither	Neither	Neither	Neither	Neither	Neither	Female	Female	Neither
FBgn0036133	emei	YES	6	3	2	3	8	NO	NO	NO	NO	NA	NO	4	Both	Both	Both	Male	Male	Male	Female	Female	Neither
FBgn0028577	hfp	NO	0	0	7	0	7	NO	NO	NO	NO	NA	NO	4	Female	Female	Female	Female	Female	Female	Female	Neither	Neither
FBgn0032242	CG5355	NO	0	0	3	0	3	NO	NO	YES	NO	NA	NO	4	Neither	Neither	Neither	Female	Female	Female	Neither	Neither	Neither
FBgn0034308	Naus	YES	6	0	2	6	8	NO	NO	NO	NO	NA	NO	4	Both	Both	Both	Both	Both	Both	Female	Female	Neither
FBgn0042201	Nplp3	NO	0	0	4	0	4	NO	NO	NO	NO	NA	NO	0	Neither	Neither	Neither	Female	Female	Female	Female	Neither	NA
FBgn0038964	Nop56	YES	3	1	2	2	5	NO	NO	NO	NO	NA	NO	4	Neither	Neither	Neither	Male	Both	Both	Female	Female	Neither
FBgn0051368	CG31368	NO	0	0	3	0	3	NO	NO	NO	NO	NA	NO	4	Female	Female	Neither	Neither	Neither	Neither	Female	Neither	Neither
FBgn0263667	Lpt	YES	3	0	3	3	6	NO	NO	NO	NO	NA	NO	4	Female	Female	Female	Both	Both	Both	Neither	Neither	NA
FBgn0039648	CG14515	NO	0	0	1	0	1	NO	NO	NO	NO	NA	NO	0	NA	NA	NA	NA	Neither	Neither	Neither	Neither	Female
FBgn0259984	kuz	NO	0	0	8	0	8	NO	NO	NO	NO	MC	YES	4	Female	Female	Female	Female	Female	Female	Female	Female	Neither
FBgn0038349	AOX3	YES	3	3	0	0	3	NO	YES	YES	NO	NA	NO	4	Neither	Neither	Neither	Male	Male	Male	Neither	Neither	NA
FBgn0035496	CG14990	NO	0	0	1	0	1	NO	NO	NO	NO	NA	NO	4	Neither	Neither	Neither	Neither	Neither	Neither	Neither	Neither	Female
FBgn0035372	CG12093	NO	0	0	3	0	3	YES	NO	NO	NO	NA	NO	4	Neither	Neither	Neither	Female	Female	Female	Neither	Neither	NA
FBgn0036144	GlcAT-P	YES	3	3	5	0	8	NO	NO	NO	NO	MC	YES	4	NA	Female	Female	Male	Male	Male	Female	Female	Female
FBgn0028467	Ube4A	NO	0	0	8	0	8	NO	NO	NO	NO	NA	NO	4	Female	Female	Female	Female	Female	Female	Female	Female	Neither
FBgn0040507	ACXD	NO	0	0	1	0	1	NO	NO	NO	NO	NA	NO	3	NA	NA	Neither	NA	Neither	Female	NA	Neither	Neither
FBgn0033367	PPO2	NO	0	0	4	0	4	NO	NO	YES	NO	NA	NO	3	Neither	Female	NA	Female	Female	Female	NA	NA	Neither
FBgn0005355	Su(fu)	NO	0	0	1	0	1	NO	NO	NO	NO	NA	NO	4	Neither	Neither	Neither	Neither	Neither	Neither	Neither	Neither	Female
FBgn0038674	CG14285	NO	0	0	7	0	7	NO	NO	NO	NO	NA	NO	0	Female	Female	Female	Female	Female	Female	Neither	Neither	Female
FBgn0038376	Hmt-1	NO	0	0	2	0	2	NO	NO	NO	NO	NA	NO	4	Neither	Neither	Neither	Neither	Neither	Neither	Female	Female	Neither
FBgn0035490	CG1136	YES	3	3	0	0	3	NO	NO	NO	NO	NA	NO	2	Neither	Neither	Neither	Male	Male	Male	Neither	Neither	Neither
FBgn0020930	Dgkepsilon	YES	3	0	4	3	7	NO	NO	NO	NO	NA	NO	4	Female	Female	Female	Both	Both	Both	Neither	Neither	Female
FBgn0038244	CG7987	NO	0	0	7	0	7	NO	NO	YES	NO	NA	NO	4	Female	Female	Female	Neither	Female	Female	Female	Female	Neither
FBgn0035285	CG12025	NO	0	0	6	0	6	NO	NO	NO	NO	NA	NO	4	Female	Female	Female	Female	Female	Female	Neither	Neither	Neither
FBgn0263346	smash	NO	0	0	3	0	3	NO	NO	NO	NO	NA	NO	4	Neither	Neither	Neither	Neither	Neither	Neither	Female	Female	Female
FBgn0033679	CG8888	YES	1	0	7	1	8	NO	NO	YES	NO	NA	NO	4	Female	Both	Female	Female	Female	Female	Female	Neither	Female
FBgn0010220	Dbp45A	YES	2	0	1	2	3	NO	NO	NO	NO	NA	NO	4	Neither	Neither	Neither	Female	Both	Both	NA	NA	Neither
FBgn0038551	Odj	NO	0	0	1	0	1	NO	NO	NO	NO	NA	NO	4	Neither	Neither	Neither	Neither	Neither	Neither	Neither	Neither	Female
FBgn0035308	CG15822	YES	3	0	1	3	4	NO	NO	NO	NO	NA	NO	4	Neither	Neither	Neither	Both	Both	Both	Neither	Neither	Female
FBgn0034380	Vps51	YES	6	3	3	3	9	NO	NO	NO	NO	NA	NO	4	Both	Both	Both	Male	Male	Male	Female	Female	Female
FBgn0010226	GstS1	YES	1	1	0	0	1	NO	YES	YES	NO	NA	NO	4	Male	Neither	Neither	Neither	Neither	Neither	Neither	Neither	Neither
FBgn0036306	CG10973	NO	0	0	5	0	5	NO	NO	NO	NO	NA	NO	4	Female	Female	Female	Neither	Neither	Neither	Female	Female	Neither
FBgn0086687	Desat1	NO	0	0	3	0	3	NO	NO	NO	NO	NA	NO	4	Neither	Neither	Neither	Neither	Neither	Neither	Female	Female	Female
FBgn0031258	CG4297	NO	0	0	9	0	9	NO	NO	NO	NO	MC	YES	4	Female	Female	Female	Female	Female	Female	Female	Female	Female
FBgn0025743	mbt	NO	0	0	3	0	3	NO	NO	NO	NO	NA	NO	4	Neither	Neither	Neither	Neither	Neither	Neither	Female	Female	Female
FBgn0014869	Pglym78	YES	3	0	1	3	4	NO	NO	YES	NO	NA	NO	4	Both	Both	Both	Neither	Neither	Neither	Neither	Neither	Female
FBgn0004368	Ptp4E	NO	0	0	2	0	2	NO	NO	NO	NO	NA	NO	4	NA	NA	NA	NA	NA	NA	Female	Neither	Female
FBgn0264962	Pcf11	NO	0	0	2	0	2	NO	NO	NO	NO	NA	NO	4	Neither	Neither	Neither	Neither	Neither	Neither	Female	Female	Neither
FBgn0035025	uri	NO	0	0	3	0	3	NO	NO	NO	NO	NA	NO	4	Female	Female	Female	Neither	Neither	Neither	Neither	Neither	Neither
FBgn0026192	par-6	NO	0	0	3	0	3	NO	NO	NO	NO	NA	NO	4	Female	Female	Female	Neither	Neither	Neither	Neither	Neither	NA
FBgn0029996	UbcE2H	NO	0	0	1	0	1	NO	NO	NO	NO	NA	NO	4	NA	NA	NA	NA	NA	NA	Neither	Neither	Female
FBgn0025800	Smox	NO	0	0	2	0	2	NO	NO	NO	NO	NA	NO	4	NA	NA	NA	NA	NA	NA	Female	Female	Neither
FBgn0263352	Unr	YES	3	3	3	0	6	NO	NO	NO	NO	NA	NO	4	NA	Neither	NA	Male	Male	Male	Female	Female	Female
FBgn0034490	CG9864	YES	2	0	4	2	6	NO	NO	NO	NO	NA	NO	1	Female	Both	Both	Female	Female	Female	Neither	Neither	Neither
FBgn0031534	Snx1	YES	3	0	2	3	5	NO	NO	NO	NO	NA	NO	4	Neither	Neither	Neither	Both	Both	Both	Female	Female	Neither
FBgn0031265	CG2794	NO	0	0	3	0	3	NO	NO	YES	NO	NA	NO	4	Neither	Neither	Neither	Female	Female	Female	Neither	Neither	Neither
FBgn0034655	CG10307	YES	1	0	7	1	8	NO	NO	NO	NO	NA	NO	4	Female	Both	Female	Female	Female	Female	Female	Female	Neither
FBgn0035541	CG15019	YES	3	0	0	3	3	NO	NO	NO	NO	NA	NO	4	Both	Both	Both	NA	NA	NA	NA	NA	Neither
FBgn0038233	HtrA2	NO	0	0	7	0	7	NO	NO	YES	NO	NA	NO	4	Female	Female	Female	Female	Female	Female	Neither	Neither	Female
FBgn0029913	Cht11	NO	0	0	2	0	2	NO	NO	NO	NO	NA	NO	4	Neither	Neither	Neither	NA	NA	NA	Female	Female	Neither
FBgn0036801	MYPT-75D	YES	1	0	6	1	7	NO	NO	NO	NO	NA	NO	4	Both	Female	Female	Female	Female	Female	Neither	Female	Neither
FBgn0028475	Hrd3	NO	0	0	3	0	3	NO	NO	NO	NO	NA	NO	4	Neither	Neither	Neither	Female	Female	Female	Neither	Neither	Neither
FBgn0027835	Dp1	YES	3	0	3	3	6	NO	NO	NO	NO	NA	NO	4	Both	Both	Both	Female	Female	Female	Neither	Neither	NA
FBgn0010303	hep	NO	0	0	1	0	1	NO	NO	NO	NO	NA	NO	4	Neither	Neither	Neither	NA	NA	NA	NA	NA	Female
FBgn0038191	CG9925	NO	0	0	1	0	1	NO	NO	NO	NO	NA	NO	0	NA	NA	NA	Female	Neither	Neither	NA	NA	NA
FBgn0286071	AdamTS-A	YES	1	1	2	0	3	NO	NO	NO	NO	NA	NO	4	Neither	Female	Neither	Male	Neither	Female	Neither	Neither	Neither
FBgn0031606	CG15439	NO	0	0	4	0	4	NO	NO	NO	NO	NA	NO	4	Female	Female	Female	NA	NA	NA	Neither	Female	Neither
FBgn0027873	Cpsf100	YES	1	1	0	0	1	NO	NO	NO	NO	NA	NO	4	NA	NA	NA	Neither	Neither	Male	Neither	NA	NA
FBgn0031304	TBC1D23	NO	0	0	3	0	3	NO	NO	NO	NO	NA	NO	4	Neither	Neither	Neither	Female	Female	Female	Neither	Neither	Neither
FBgn0038947	Sar1	NO	0	0	6	0	6	NO	NO	YES	NO	NA	NO	4	Female	Female	Female	Female	Female	Female	Neither	Neither	Neither
FBgn0015805	HDAC1	NO	0	0	6	0	6	NO	NO	NO	NO	NA	NO	4	Female	Female	Female	Female	Female	Female	Neither	Neither	Neither
FBgn0261530	nbs	NO	0	0	6	0	6	NO	NO	NO	NO	NA	NO	4	Female	Female	Female	NA	NA	NA	Female	Female	Female
FBgn0038088	CG10126	NO	0	0	6	0	6	NO	NO	YES	NO	NA	NO	4	Female	Female	Female	Female	Female	Female	NA	NA	Neither
FBgn0020764	Alas	NO	0	0	2	0	2	NO	NO	NO	NO	NA	NO	4	Neither	Neither	Neither	Neither	Neither	Neither	Female	Female	NA
FBgn0029912	CG4557	NO	0	0	5	0	5	NO	NO	NO	NO	NA	NO	4	Female	Female	Female	NA	NA	NA	Female	Female	Neither
FBgn0263077	M7BP	YES	4	0	2	4	6	NO	NO	NO	NO	NA	NO	4	Both	Both	Female	Female	Both	Both	Neither	Neither	Neither
FBgn0027363	Stam	YES	3	0	6	3	9	NO	NO	NO	NO	NA	NO	4	Female	Female	Female	Both	Both	Both	Female	Female	Female
FBgn0032796	cyst	YES	2	2	1	0	3	NO	NO	NO	NO	NA	NO	4	Male	Neither	Male	NA	NA	NA	Neither	Neither	Female
FBgn0037949	prd1	NO	0	0	1	0	1	NO	NO	YES	NO	NA	NO	4	Neither	Neither	Neither	Neither	Female	Neither	Neither	Neither	Neither
FBgn0036448	mop	YES	3	0	4	3	7	NO	NO	NO	NO	NA	NO	4	Female	Female	Female	Both	Both	Both	Neither	Neither	Female
FBgn0034335	GstE1	NO	0	0	2	0	2	NO	NO	NO	NO	NA	NO	4	Neither	Neither	Neither	Neither	Neither	Neither	Female	Female	NA
FBgn0035236	CG12004	NO	0	0	7	0	7	NO	NO	NO	NO	NA	NO	4	Female	Female	Female	Female	Female	Female	Neither	Neither	Female
FBgn0030007	alpha-PheRS	NO	0	0	2	0	2	NO	NO	NO	NO	NA	NO	4	NA	NA	NA	NA	NA	NA	Female	Female	Neither
FBgn0000075	amd	YES	1	0	1	1	2	NO	NO	NO	NO	NA	NO	0	NA	Female	Neither	NA	Both	NA	Neither	NA	NA
FBgn0034057	CG8314	NO	0	0	7	0	7	NO	NO	NO	NO	NA	NO	4	Female	Female	Female	Female	Female	Female	Neither	Neither	Female
FBgn0039698	CG7789	YES	3	0	6	3	9	NO	NO	NO	NO	NA	NO	4	Both	Both	Both	Female	Female	Female	Female	Female	Female
FBgn0261554	CG42672	NO	0	0	8	0	8	NO	NO	NO	NO	NA	NO	4	Female	Female	Female	Female	Female	Female	Female	Female	Neither
FBgn0028707	Mt2	NO	0	0	2	0	2	NO	NO	NO	NO	NA	NO	1	Neither	Neither	Neither	Neither	Neither	Neither	Female	Female	Neither
FBgn0031589	Naprt	YES	6	0	1	6	7	NO	NO	NO	NO	NA	NO	4	Both	Both	Both	Both	Both	Both	Neither	Neither	Female
FBgn0020278	loco	YES	2	0	4	2	6	NO	NO	NO	NO	NA	NO	4	Female	Female	Female	Both	Both	Female	Neither	Neither	Neither
FBgn0033653	CG13192	NO	0	0	6	0	6	NO	NO	NO	NO	NA	NO	4	Neither	Neither	Neither	Female	Female	Female	Female	Female	Female
FBgn0004509	Fur1	YES	3	0	3	3	6	NO	NO	NO	NO	NA	NO	4	Both	Both	Both	NA	NA	NA	Female	Female	Female
FBgn0031542	CG15414	NO	0	0	1	0	1	NO	NO	NO	NO	NA	NO	0	NA	NA	Neither	Neither	Neither	Neither	Neither	Neither	Female
FBgn0085484	Pdxk	NO	0	0	6	0	6	NO	NO	YES	NO	NA	NO	4	Female	Female	Female	NA	NA	NA	Female	Female	Female
FBgn0039466	CG5521	NO	0	0	6	0	6	NO	NO	NO	NO	NA	NO	4	Neither	Neither	Neither	Female	Female	Female	Female	Female	Female
FBgn0041092	tai	NO	0	0	1	0	1	NO	NO	NO	NO	NA	NO	4	Neither	Neither	Neither	Female	Neither	Neither	Neither	Neither	Neither
FBgn0259192	CG42296	NO	0	0	2	0	2	NO	NO	NO	NO	NA	NO	3	NA	Female	NA	Neither	Female	NA	Neither	NA	Neither
FBgn0034151	CG15617	NO	0	0	1	0	1	NO	NO	NO	NO	NA	NO	0	NA	NA	NA	Female	Neither	Neither	Neither	NA	Neither
FBgn0259224	CG42324	YES	2	2	0	0	2	NO	NO	NO	NO	NA	NO	4	Neither	NA	Neither	Male	Neither	Male	NA	Neither	Neither
FBgn0028746	CG18508	NO	0	0	1	0	1	NO	NO	NO	NO	NA	NO	4	NA	NA	NA	NA	NA	NA	NA	NA	Female
FBgn0032339	Wdr59	NO	0	0	9	0	9	NO	NO	NO	NO	NA	NO	4	Female	Female	Female	Female	Female	Female	Female	Female	Female
FBgn0038601	Polr1E	YES	3	0	1	3	4	NO	NO	NO	NO	NA	NO	4	Both	Both	Both	Neither	Neither	Neither	Neither	Neither	Female
FBgn0034126	jtb	NO	0	0	4	0	4	NO	NO	NO	NO	NA	NO	4	Female	Female	Female	Neither	Neither	Neither	Neither	Neither	Female
FBgn0028744	CG5033	NO	0	0	4	0	4	NO	NO	NO	NO	NA	NO	4	Neither	Neither	Neither	Female	Female	Female	Neither	Neither	Female
FBgn0259226	CG42326	NO	0	0	1	0	1	YES	NO	NO	NO	NA	NO	0	NA	NA	Neither	Neither	NA	Female	NA	Neither	Neither
FBgn0036556	hzg	YES	3	0	1	3	4	NO	NO	NO	NO	NA	NO	4	Neither	Neither	Neither	Both	Both	Both	Neither	Neither	Female
FBgn0262518	Rab8	NO	0	0	2	0	2	NO	NO	NO	NO	NA	NO	4	Neither	Neither	Neither	Neither	Neither	Neither	Female	Female	Neither
FBgn0011766	E2f1	NO	0	0	2	0	2	NO	NO	NO	NO	NA	NO	4	Neither	Neither	Neither	Neither	Neither	Neither	Female	Female	Neither
FBgn0039488	CG6066	NO	0	0	1	0	1	NO	NO	NO	NO	NA	NO	4	Neither	Neither	Neither	NA	NA	NA	Neither	Neither	Female
FBgn0032120	CG33298	NO	0	0	9	0	9	NO	NO	NO	NO	NA	NO	4	Female	Female	Female	Female	Female	Female	Female	Female	Female
FBgn0265523	Smr	NO	0	0	1	0	1	NO	NO	NO	NO	NA	NO	4	NA	NA	NA	NA	NA	NA	Neither	Neither	Female
FBgn0031999	CG8419	NO	0	0	2	0	2	NO	NO	NO	NO	NA	NO	0	NA	Neither	Neither	NA	NA	Female	NA	NA	Female
FBgn0015905	ast	NO	0	0	8	0	8	NO	NO	NO	NO	NA	NO	4	Female	Female	Female	Female	Female	Female	Female	Female	Neither
FBgn0035475	CG10866	NO	0	0	1	0	1	NO	NO	NO	NO	NA	NO	4	Neither	Neither	Neither	Neither	Female	Neither	NA	NA	Neither
FBgn0039464	CG6330	NO	0	0	1	0	1	NO	NO	NO	NO	NA	NO	1	Neither	Neither	Neither	Neither	Neither	Neither	Female	Neither	Neither
FBgn0041180	Tep4	NO	0	0	5	0	5	YES	NO	NO	NO	NA	NO	4	Female	Female	Female	NA	NA	NA	Female	Female	NA
FBgn0027868	Nup107	NO	0	0	1	0	1	NO	NO	NO	NO	NA	NO	4	Neither	Neither	Neither	Neither	Neither	Neither	Neither	Neither	Female
FBgn0034963	Not11	NO	0	0	3	0	3	NO	NO	NO	NO	NA	NO	4	Neither	Neither	Neither	Female	Female	Female	Neither	Neither	Neither
FBgn0263197	Patronin	NO	0	0	5	0	5	NO	NO	NO	NO	NA	NO	4	Female	Female	Female	Neither	Neither	Neither	Female	Female	Neither
FBgn0000046	Act87E	NO	0	0	1	0	1	NO	NO	NO	NO	NA	NO	4	Neither	Female	Neither	Neither	Neither	Neither	Neither	Neither	Neither
FBgn0040972	CG16978	NO	0	0	2	0	2	NO	NO	NO	NO	NA	NO	0	Neither	NA	NA	Female	NA	Female	Neither	Neither	Neither
FBgn0037001	ND-39	NO	0	0	3	0	3	NO	NO	YES	NO	NA	NO	4	Female	Female	Female	Neither	Neither	Neither	Neither	Neither	Neither
FBgn0261113	Xrp1	NO	0	0	2	0	2	NO	YES	NO	NO	NA	NO	4	Neither	Neither	Neither	Neither	Neither	Neither	Female	Female	Neither
FBgn0027567	Ciz1	NO	0	0	6	0	6	NO	NO	NO	NO	NA	NO	4	Female	Female	Female	Neither	Neither	Neither	Female	Female	Female
FBgn0039229	Saf-B	NO	0	0	2	0	2	NO	NO	YES	NO	NA	NO	4	Neither	Neither	Neither	NA	NA	NA	Female	Female	Neither
FBgn0261550	CG42668	NO	0	0	5	0	5	NO	NO	NO	NO	NA	NO	4	Female	Female	Female	Neither	Neither	Neither	Female	Female	Neither
FBgn0261995	CG42813	NO	0	0	6	0	6	NO	NO	NO	NO	NA	NO	4	Female	Female	Female	Female	Female	Female	Neither	Neither	Neither
FBgn0000996	dup	NO	0	0	3	0	3	NO	NO	NO	NO	NA	NO	1	Neither	Neither	Neither	Female	Female	Female	Neither	Neither	Neither
FBgn0030812	wcy	NO	0	0	3	0	3	NO	NO	NO	NO	NA	NO	4	Female	Female	Female	Neither	Neither	Neither	Neither	Neither	Neither
FBgn0037592	CG11737	YES	2	0	4	2	6	NO	NO	NO	NO	NA	NO	4	Both	Female	Both	Female	Female	Female	Neither	Neither	Neither
FBgn0016119	ATPsynCF6	NO	0	0	2	0	2	NO	NO	YES	NO	NA	NO	4	Neither	Neither	Neither	Neither	Neither	Neither	Female	Female	NA
FBgn0034817	Art7	NO	0	0	7	0	7	NO	NO	NO	NO	NA	NO	2	Female	Female	Female	Female	Female	Female	Neither	Neither	Female
FBgn0032002	CG8353	NO	0	0	1	0	1	NO	NO	NO	NO	NA	NO	4	Neither	Neither	Neither	Neither	Neither	Neither	NA	NA	Female
FBgn0085390	Dgk	NO	0	0	1	0	1	NO	NO	NO	NO	NA	NO	4	Neither	Neither	NA	Neither	Female	Neither	Neither	NA	Neither
FBgn0260990	yata	NO	0	0	3	0	3	NO	NO	NO	NO	NA	NO	4	Neither	Neither	Neither	Neither	Neither	Neither	Female	Female	Female
FBgn0036196	CG11658	NO	0	0	7	0	7	NO	NO	NO	NO	NA	NO	4	Female	Female	Female	Female	Female	Female	Neither	Neither	Female
FBgn0028538	Sec71	YES	3	0	0	3	3	NO	NO	NO	NO	NA	NO	4	NA	NA	NA	Both	Both	Both	Neither	Neither	Neither
FBgn0000052	Pfas	NO	0	0	9	0	9	NO	NO	NO	NO	NA	NO	4	Female	Female	Female	Female	Female	Female	Female	Female	Female
FBgn0035802	Pura	YES	3	0	5	3	8	NO	NO	NO	NO	NA	NO	4	Female	Female	Female	Both	Both	Both	Female	Female	Neither
FBgn0034796	CG3700	NO	0	0	2	0	2	NO	NO	NO	NO	NA	NO	2	Neither	Neither	Neither	Neither	Neither	Neither	Female	Female	Neither
FBgn0003502	Btk29A	NO	0	0	5	0	5	NO	NO	NO	NO	NA	NO	4	Neither	Neither	Neither	Female	Female	Female	Female	Female	NA
FBgn0033352	PAN2	YES	3	0	0	3	3	NO	NO	NO	NO	NA	NO	4	Both	Both	Both	Neither	Neither	Neither	NA	NA	Neither
FBgn0264490	Eip93F	YES	3	1	1	2	4	NO	NO	NO	NO	NA	NO	4	Neither	Neither	Neither	Both	Male	Both	Neither	Neither	Female
FBgn0261112	APP-BP1	NO	0	0	3	0	3	NO	NO	NO	NO	NA	NO	4	Female	Female	Female	Neither	Neither	Neither	Neither	Neither	Neither
FBgn0083962	CG34126	NO	0	0	5	0	5	NO	NO	NO	NO	NA	NO	4	Neither	Neither	Neither	Female	Female	Female	Neither	Female	Female
FBgn0266083	ocm	NO	0	0	1	0	1	NO	NO	YES	NO	NA	NO	4	Neither	Female	Neither	Neither	Neither	NA	Neither	NA	NA
FBgn0031604	Elp3	NO	0	0	4	0	4	NO	NO	NO	NO	NA	NO	3	Female	Neither	Neither	NA	NA	NA	Female	Female	Female
FBgn0028523	CG5888	NO	0	0	1	0	1	NO	NO	NO	NO	NA	NO	4	Neither	Neither	Neither	Neither	Neither	Neither	Female	NA	Neither
FBgn0031536	Cog3	NO	0	0	9	0	9	NO	NO	NO	NO	NA	NO	4	Female	Female	Female	Female	Female	Female	Female	Female	Female
FBgn0036258	eIF3l	NO	0	0	1	0	1	NO	NO	NO	NO	NA	NO	4	Neither	Neither	Neither	Neither	Neither	Neither	Neither	Neither	Female
FBgn0000053	Gart	YES	3	0	6	3	9	NO	NO	NO	NO	NA	NO	4	Both	Female	Female	Both	Both	Female	Female	Female	Female
FBgn0026575	hang	NO	0	0	1	0	1	NO	NO	NO	NO	NA	NO	4	Female	Neither	Neither	NA	NA	NA	Neither	Neither	Neither
FBgn0031530	Pgant2	NO	0	0	1	0	1	NO	NO	NO	NO	NA	NO	4	NA	Neither	NA	NA	Female	Neither	NA	NA	NA
FBgn0026722	drosha	NO	0	0	3	0	3	NO	NO	NO	NO	NA	NO	4	Neither	Neither	Neither	Female	Female	Female	Neither	Neither	Neither
FBgn0034494	CG10444	YES	3	0	2	3	5	NO	NO	NO	NO	NA	NO	4	NA	NA	NA	Both	Both	Both	Female	Female	Neither
FBgn0038742	Arc42	YES	3	0	0	3	3	NO	NO	NO	NO	NA	NO	4	Both	Both	Both	NA	NA	NA	Neither	Neither	Neither
FBgn0036534	DCP2	NO	0	0	9	0	9	NO	NO	NO	NO	NA	NO	4	Female	Female	Female	Female	Female	Female	Female	Female	Female
FBgn0031895	CG4497	YES	1	0	2	1	3	NO	NO	NO	NO	NA	NO	4	Neither	Neither	Neither	Both	Female	Female	Neither	Neither	Neither
FBgn0010808	Chchd3	YES	3	3	3	0	6	NO	NO	NO	NO	NA	NO	4	NA	NA	NA	Male	Male	Male	Female	Female	Female
FBgn0052133	Ptip	YES	1	1	0	0	1	NO	NO	NO	NO	NA	NO	4	Neither	NA	Neither	Neither	Neither	Male	NA	NA	NA
FBgn0016698	Ptpa	YES	3	0	3	3	6	NO	NO	NO	NO	NA	NO	3	Both	Both	Both	Neither	Neither	Neither	Female	Female	Female
FBgn0037849	CG4596	NO	0	0	1	0	1	NO	NO	NO	NO	NA	NO	0	NA	Neither	Neither	NA	Female	Neither	Neither	NA	NA
FBgn0029994	Ldsdh1	NO	0	0	1	0	1	NO	NO	NO	NO	NA	NO	4	NA	NA	NA	NA	NA	NA	Neither	Neither	Female
FBgn0004359	T48	NO	0	0	1	0	1	NO	NO	NO	NO	NA	NO	4	Neither	Neither	Neither	Neither	Neither	Neither	Female	Neither	Neither
FBgn0036451	Helz	YES	3	0	0	3	3	NO	NO	NO	NO	NA	NO	4	NA	Neither	NA	Both	Both	Both	Neither	Neither	Neither
FBgn0050272	MFS1	YES	1	1	0	0	1	NO	NO	NO	NO	NA	NO	0	NA	NA	Neither	NA	NA	Male	NA	Neither	NA
FBgn0039766	CG15536	YES	3	3	0	0	3	NO	NO	NO	NO	NA	NO	2	NA	NA	NA	Male	Male	Male	NA	NA	NA
FBgn0031801	CG9498	NO	0	0	6	0	6	NO	NO	NO	NO	NA	NO	2	Female	Female	Female	Female	Female	Female	Neither	Neither	Neither
FBgn0038721	subdued	YES	1	0	7	1	8	NO	NO	NO	NO	NA	NO	4	Female	Female	Female	Female	Female	Both	Female	Female	Neither
FBgn0026059	Mhcl	NO	0	0	6	0	6	NO	NO	NO	NO	NA	NO	4	Female	Female	Female	Neither	Neither	Neither	Female	Female	Female
FBgn0037153	olf413	NO	0	0	2	0	2	NO	NO	NO	NO	NA	NO	0	NA	Female	NA	NA	Female	NA	Neither	NA	NA
FBgn0286785	scb	YES	1	0	5	1	6	NO	NO	NO	NO	NA	NO	4	Neither	Neither	Neither	Female	Female	Both	Female	Female	Female
FBgn0028479	Mtpalpha	NO	0	0	1	0	1	NO	YES	YES	NO	NA	NO	4	Neither	Neither	Neither	Neither	Neither	Neither	Neither	Neither	Female
FBgn0033379	Mys45A	YES	3	0	2	3	5	NO	NO	NO	NO	NA	NO	4	Both	Both	Both	Neither	Neither	Neither	Female	Female	NA
FBgn0027594	drpr	YES	3	0	3	3	6	NO	NO	NO	NO	NA	NO	4	Both	Both	Both	Neither	Neither	Neither	Female	Female	Female
FBgn0052982	CG32982	NO	0	0	3	0	3	NO	NO	NO	NO	NA	NO	4	Neither	Neither	Neither	Female	Female	Female	Neither	Neither	Neither
FBgn0261647	Axud1	NO	0	0	3	0	3	NO	NO	NO	NO	NA	NO	4	Neither	Neither	Neither	Neither	Neither	Neither	Female	Female	Female
FBgn0038524	sll	NO	0	0	6	0	6	NO	NO	NO	NO	NA	NO	4	Female	Female	Female	Female	Female	Female	Neither	Neither	Neither
FBgn0032684	Ugt301D1	NO	0	0	5	0	5	NO	NO	NO	NO	NA	NO	3	Female	Neither	Female	Female	Female	Female	Neither	Neither	Neither
FBgn0020412	JIL-1	YES	3	3	2	0	5	NO	NO	NO	NO	NA	NO	4	Neither	Neither	Neither	Male	Male	Male	Female	Female	Neither
FBgn0039214	puf	NO	0	0	6	0	6	NO	NO	NO	NO	NA	NO	4	Female	Female	Female	Female	Female	Female	Neither	Neither	NA
FBgn0026181	Rok	YES	3	3	0	0	3	NO	NO	YES	NO	NA	NO	4	Neither	Neither	Neither	Male	Male	Male	Neither	Neither	Neither
FBgn0086372	lap	NO	0	0	1	0	1	NO	NO	NO	NO	NA	NO	4	Neither	Neither	Neither	Neither	Neither	Neither	Female	Neither	Neither
FBgn0051092	LpR2	NO	0	0	3	0	3	NO	NO	NO	NO	NA	NO	4	Neither	Neither	Neither	NA	NA	NA	Female	Female	Female
FBgn0003731	Egfr	YES	3	0	5	3	8	NO	NO	NO	NO	NA	NO	4	Female	Female	Female	Both	Both	Both	Female	Female	Neither
FBgn0039863	CG1815	YES	3	0	4	3	7	NO	NO	NO	NO	NA	NO	4	Both	Both	Female	Female	Both	Female	Neither	Female	Neither
FBgn0002036	CG10561	YES	2	0	1	2	3	NO	NO	NO	NO	NA	NO	4	Both	Both	Female	Neither	Neither	Neither	Neither	Neither	Neither
FBgn0031307	MFS3	NO	0	0	7	0	7	NO	NO	NO	NO	NA	NO	0	Female	Female	Female	Female	Female	Neither	Female	Female	Neither
FBgn0032262	CG7384	NO	0	0	3	0	3	NO	NO	NO	NO	NA	NO	3	NA	NA	NA	Neither	Neither	Neither	Female	Female	Female
FBgn0267390	dop	YES	2	0	5	2	7	NO	NO	NO	NO	NA	NO	4	Female	Female	Female	Both	Female	Both	NA	NA	Female
FBgn0035985	Cpr67B	NO	0	0	6	0	6	NO	NO	NO	NO	NA	NO	1	Female	Female	Female	Neither	Neither	Neither	Female	Female	Female
FBgn0031633	Fnta	YES	3	0	3	3	6	NO	NO	NO	NO	NA	NO	4	Both	Both	Both	Female	Female	Female	Neither	NA	Neither
FBgn0037818	CG6465	NO	0	0	2	0	2	NO	NO	NO	NO	NA	NO	0	Neither	Neither	NA	Neither	Female	Neither	Female	Neither	Neither
FBgn0052473	CG32473	NO	0	0	9	0	9	NO	NO	YES	NO	NA	NO	4	Female	Female	Female	Female	Female	Female	Female	Female	Female
FBgn0039829	CG15561	YES	2	1	4	1	6	NO	NO	NO	NO	NA	NO	1	Female	Female	Female	Both	Neither	Male	Female	Neither	Neither
FBgn0259685	crb	NO	0	0	4	0	4	NO	NO	NO	NO	SC	YES	4	Neither	Neither	Neither	Female	Female	Female	Female	Neither	Neither
FBgn0032387	CG16965	YES	1	0	1	1	2	NO	NO	NO	NO	NA	NO	3	Female	Both	NA	Neither	Neither	Neither	Neither	Neither	Neither
FBgn0030345	CG1847	NO	0	0	2	0	2	NO	NO	NO	NO	NA	NO	4	NA	NA	NA	NA	NA	NA	Female	Female	Neither
FBgn0004910	Eip63F-1	NO	0	0	2	0	2	NO	NO	NO	NO	NA	NO	4	Neither	Neither	Neither	Neither	Neither	Neither	Female	Female	Neither
FBgn0263258	chas	NO	0	0	7	0	7	NO	NO	NO	NO	NA	NO	4	Female	Female	Female	Female	Female	Female	Female	Neither	Neither
FBgn0031379	CG7289	YES	6	0	2	6	8	NO	NO	NO	NO	NA	NO	4	Both	Both	Both	Both	Both	Both	Female	Female	Neither
FBgn0024996	eIF2Bbeta	NO	0	0	1	0	1	NO	NO	NO	NO	NA	NO	4	NA	NA	NA	NA	NA	NA	Neither	Neither	Female
FBgn0039668	Trc8	YES	3	3	1	0	4	NO	NO	NO	NO	NA	NO	4	Neither	Neither	Neither	Male	Male	Male	Neither	Neither	Female
FBgn0004387	Klp98A	NO	0	0	9	0	9	NO	NO	NO	NO	NA	NO	4	Female	Female	Female	Female	Female	Female	Female	Female	Female
FBgn0015371	chn	NO	0	0	1	0	1	NO	NO	NO	NO	NA	NO	0	NA	Neither	NA	Neither	Female	Neither	Neither	NA	Neither
FBgn0039767	CG2218	YES	3	3	0	0	3	NO	NO	NO	NO	NA	NO	4	NA	NA	NA	Male	Male	Male	NA	NA	Neither
FBgn0034687	CG11475	NO	0	0	2	0	2	NO	NO	YES	NO	NA	NO	4	Neither	Neither	NA	NA	Female	Female	Neither	NA	Neither
FBgn0036333	MICAL-like	NO	0	0	6	0	6	NO	NO	NO	NO	NA	NO	4	NA	NA	NA	Female	Female	Female	Female	Female	Female
FBgn0286828	dind	YES	3	3	0	0	3	NO	NO	NO	NO	NA	NO	4	Neither	Neither	Neither	Male	Male	Male	Neither	Neither	Neither
FBgn0086359	Invadolysin	NO	0	0	3	0	3	NO	NO	NO	NO	NA	NO	4	Female	Female	Neither	Neither	Neither	Neither	Neither	Neither	Female
FBgn0052104	CG32104	NO	0	0	7	0	7	NO	NO	NO	NO	NA	NO	3	Female	Female	Female	Female	Female	Female	Neither	Neither	Female
FBgn0032488	CG16812	NO	0	0	3	0	3	NO	NO	NO	NO	NA	NO	4	Female	Female	Female	Neither	Neither	Neither	Neither	Neither	Neither
FBgn0004611	Plc21C	NO	0	0	2	0	2	NO	NO	NO	NO	NA	NO	4	Neither	Neither	Neither	Neither	Neither	Neither	Female	Female	Neither
FBgn0034085	Ptp52F	YES	2	0	6	2	8	NO	NO	NO	NO	NA	NO	4	Both	Female	Both	Female	Neither	Female	Female	Female	Female
FBgn0039639	Alg13	NO	0	0	2	0	2	NO	NO	NO	NO	NA	NO	2	Neither	Neither	Neither	NA	NA	NA	Female	Female	Neither
FBgn0038183	CG9286	NO	0	0	1	0	1	NO	NO	NO	NO	NA	NO	4	Neither	Neither	Neither	Neither	Neither	Neither	Neither	Neither	Female
FBgn0022288	l(2)09851	NO	0	0	1	0	1	NO	NO	NO	NO	NA	NO	4	Neither	Neither	Neither	NA	NA	NA	Neither	Neither	Female
FBgn0033194	Vps13	NO	0	0	3	0	3	NO	NO	YES	NO	NA	NO	4	Neither	Neither	Neither	Female	Female	Female	Neither	Neither	Neither
FBgn0016672	Ipp	NO	0	0	3	0	3	NO	NO	NO	NO	NA	NO	4	Neither	Neither	Neither	Female	Female	Female	NA	NA	Neither
FBgn0005626	ple	NO	0	0	2	0	2	NO	NO	NO	NO	NA	NO	2	Neither	Neither	Neither	Neither	Neither	Neither	Female	Female	Neither
FBgn0283531	Duox	NO	0	0	1	0	1	NO	NO	NO	NO	NA	NO	1	Neither	Neither	Neither	Neither	NA	Neither	Neither	Female	Neither
FBgn0020655	ArfGAP1	NO	0	0	4	0	4	NO	NO	NO	NO	NA	NO	4	Neither	Neither	Neither	Female	Female	Female	Neither	Neither	Female
FBgn0036299	Tsf2	YES	6	0	2	6	8	NO	NO	NO	NO	NA	NO	4	Both	Both	Both	Both	Both	Both	Female	Female	Neither
FBgn0020496	CtBP	NO	0	0	1	0	1	NO	NO	NO	NO	NA	NO	4	Neither	Female	Neither	Neither	Neither	Neither	Neither	Neither	Neither
FBgn0031869	CG18304	YES	1	0	1	1	2	NO	NO	NO	NO	NA	NO	4	NA	Both	Neither	Neither	Female	NA	Neither	Neither	Neither
FBgn0259227	CG42327	NO	0	0	2	0	2	NO	NO	NO	NO	NA	NO	4	Neither	Female	Female	Neither	Neither	Neither	Neither	Neither	Neither
FBgn0034460	CG18367	NO	0	0	2	0	2	NO	NO	NO	NO	NA	NO	0	Neither	Neither	Neither	Neither	Female	Female	NA	NA	NA
FBgn0036502	CG7841	NO	0	0	3	0	3	NO	NO	NO	NO	NA	NO	3	NA	NA	NA	Female	Female	Female	NA	Neither	Neither
FBgn0000416	Sap-r	NO	0	0	9	0	9	NO	NO	YES	NO	NA	NO	4	Female	Female	Female	Female	Female	Female	Female	Female	Female
FBgn0034797	nahoda	YES	3	3	1	0	4	NO	YES	NO	NO	SC	YES	4	Female	Neither	Neither	Male	Male	Male	Neither	Neither	Neither
FBgn0017558	Pdk	NO	0	0	6	0	6	NO	NO	NO	NO	NA	NO	4	Female	Female	Female	Female	Female	Female	Neither	Neither	Neither
FBgn0260860	Bet5	YES	3	3	3	0	6	NO	NO	NO	NO	NA	NO	4	Female	Female	Female	Male	Male	Male	Neither	Neither	Neither
FBgn0032050	CG13096	NO	0	0	6	0	6	NO	NO	NO	NO	NA	NO	4	Neither	Neither	Neither	Female	Female	Female	Female	Female	Female
FBgn0028331	l(1)G0289	NO	0	0	1	0	1	NO	NO	NO	NO	NA	NO	4	NA	NA	NA	NA	NA	NA	NA	NA	Female
FBgn0033751	CG8818	NO	0	0	3	0	3	NO	NO	NO	NO	NA	NO	4	Neither	Neither	Neither	Female	Female	Female	Neither	Neither	Neither
FBgn0031628	CG3294	NO	0	0	3	0	3	NO	NO	NO	NO	NA	NO	0	Neither	Neither	Neither	Female	Female	Female	Neither	Neither	Neither
FBgn0264089	sli	YES	1	0	1	1	2	NO	NO	NO	NO	NA	NO	4	NA	Both	NA	Neither	Female	NA	Neither	NA	NA
FBgn0028956	mthl3	NO	0	0	3	0	3	NO	NO	NO	NO	NA	NO	4	Female	Female	Female	Neither	Neither	Neither	Neither	Neither	Neither
FBgn0260866	dnr1	NO	0	0	1	0	1	NO	NO	NO	NO	NA	NO	4	Neither	Neither	Neither	Neither	Neither	Neither	Female	Neither	Neither
FBgn0015664	Dref	NO	0	0	5	0	5	NO	NO	NO	NO	NA	NO	4	Female	Female	Female	NA	NA	NA	Female	Female	Neither
FBgn0053523	CG33523	YES	3	0	3	3	6	NO	NO	YES	NO	NA	NO	4	Neither	Neither	Neither	Both	Both	Both	Female	Female	Female
FBgn0261938	PolrMT	NO	0	0	6	0	6	NO	NO	NO	NO	NA	NO	3	Female	Female	Neither	Female	Female	Female	Neither	Female	NA
FBgn0023441	fus	NO	0	0	6	0	6	NO	NO	NO	NO	NA	NO	4	Female	Female	Female	Female	Female	Female	Neither	Neither	NA
FBgn0034570	CG10543	NO	0	0	5	0	5	NO	NO	NO	NO	NA	NO	4	Female	Female	Neither	NA	NA	NA	Female	Female	Female
FBgn0015277	Pi3K59F	YES	3	0	1	3	4	NO	NO	NO	NO	NA	NO	4	Neither	Neither	Neither	Both	Both	Both	Neither	Neither	Female
FBgn0051324	CG31324	NO	0	0	2	0	2	NO	NO	NO	YES	NA	NO	4	Neither	Neither	Neither	NA	NA	NA	Female	Female	Neither
FBgn0027560	Tps1	NO	0	0	1	0	1	NO	NO	YES	NO	NA	NO	4	Neither	Neither	Neither	Neither	Neither	Neither	Neither	Neither	Female
FBgn0259163	CG42268	NO	0	0	3	0	3	NO	NO	NO	NO	NA	NO	4	Female	Female	Female	Neither	Neither	Neither	Neither	Neither	Neither
FBgn0004574	Rop	NO	0	0	9	0	9	NO	NO	NO	NO	NA	NO	4	Female	Female	Female	Female	Female	Female	Female	Female	Female
FBgn0010356	Taf5	NO	0	0	3	0	3	NO	NO	NO	NO	NA	NO	4	Female	Female	Female	NA	NA	NA	Neither	Neither	Neither
FBgn0051326	CG31326	NO	0	0	9	0	9	NO	NO	NO	NO	NA	NO	2	Female	Female	Female	Female	Female	Female	Female	Female	Female
FBgn0039790	CG2246	NO	0	0	5	0	5	NO	NO	NO	NO	NA	NO	4	Female	Female	Female	Neither	Neither	Neither	Female	Female	Neither
FBgn0042205	CG18764	NO	0	0	2	0	2	NO	NO	NO	NO	NA	NO	1	Female	Female	Neither	Neither	Neither	Neither	NA	NA	NA
FBgn0263241	Mocs1	YES	3	3	2	0	5	NO	NO	NO	NO	NA	NO	4	Neither	Neither	Neither	Male	Male	Male	Female	Female	Neither
FBgn0034814	CG9890	YES	3	0	0	3	3	NO	NO	NO	NO	NA	NO	4	Neither	Neither	Neither	Both	Both	Both	Neither	Neither	Neither
FBgn0243511	psidin	NO	0	0	1	0	1	NO	NO	NO	NO	NA	NO	4	Neither	Neither	Neither	Neither	Neither	Neither	Neither	Neither	Female
FBgn0036018	CG3335	YES	3	3	2	0	5	NO	NO	NO	NO	NA	NO	3	Neither	Neither	Neither	Male	Male	Male	Female	Female	Neither
FBgn0040102	lectin-24Db	YES	3	0	3	3	6	NO	NO	NO	NO	NA	NO	0	Female	Both	Neither	Both	Both	Female	NA	NA	Female
FBgn0011672	Mvl	NO	0	0	2	0	2	NO	NO	NO	NO	NA	NO	4	Neither	Neither	Neither	Neither	Neither	Neither	Female	Neither	Female
FBgn0035237	CG13917	YES	1	0	4	1	5	NO	NO	NO	NO	NA	NO	4	Female	Both	Female	Neither	Neither	Neither	Female	Female	Neither
FBgn0034398	CG15098	YES	3	0	3	3	6	NO	NO	NO	NO	NA	NO	4	Female	Female	Female	Both	Both	Both	Neither	Neither	Neither
FBgn0004698	Xpc	NO	0	0	7	0	7	NO	NO	NO	NO	NA	NO	4	Female	Female	Female	Female	Female	Female	Neither	Neither	Female
FBgn0038515	CG5823	NO	0	0	1	0	1	NO	NO	NO	NO	NA	NO	4	Neither	Neither	Neither	NA	NA	NA	Female	Neither	Neither
FBgn0039817	CG15553	NO	0	0	1	0	1	NO	NO	NO	NO	NA	NO	0	Female	Neither	Neither	Neither	NA	Neither	Neither	Neither	Neither
FBgn0026401	Nipped-B	NO	0	0	2	0	2	NO	NO	NO	NO	NA	NO	4	Neither	Neither	Neither	Neither	Neither	Neither	Female	Female	Neither
FBgn0031865	Nha1	NO	0	0	1	0	1	NO	NO	NO	NO	NA	NO	0	NA	NA	NA	Neither	Neither	Neither	Neither	NA	Female
FBgn0010389	htl	NO	0	0	5	0	5	NO	NO	NO	NO	NA	NO	4	Neither	Female	Neither	Female	Female	Female	Female	Neither	Neither
FBgn0005624	Psc	NO	0	0	4	0	4	NO	NO	NO	NO	NA	NO	1	Female	Female	Neither	Neither	Neither	Female	Neither	Neither	Female
FBgn0000414	Dab	NO	0	0	1	0	1	NO	NO	NO	NO	NA	NO	4	NA	NA	NA	NA	NA	NA	Female	NA	NA
FBgn0036727	SecCl	YES	1	0	1	1	2	NO	NO	NO	NO	EDC	YES	4	NA	Neither	NA	Neither	Both	NA	Female	NA	Neither
FBgn0015949	hrg	YES	3	3	5	0	8	NO	NO	NO	NO	NA	NO	4	Female	Female	Female	Male	Male	Male	Female	Female	Neither
FBgn0261823	Asx	NO	0	0	1	0	1	NO	NO	NO	NO	NA	NO	4	Neither	Neither	Neither	Neither	Neither	Neither	Neither	Neither	Female
FBgn0038953	CG18596	NO	0	0	1	0	1	NO	NO	NO	NO	NA	NO	4	Neither	Neither	Neither	Neither	Neither	Neither	NA	NA	Female
FBgn0035934	TrpA1	NO	0	0	1	0	1	NO	NO	NO	NO	NA	NO	0	NA	NA	NA	NA	Female	Neither	NA	NA	Neither
FBgn0014269	prod	NO	0	0	8	0	8	NO	NO	NO	NO	NA	NO	4	Female	Female	Female	Female	Female	Female	Female	Female	Neither
FBgn0028648	mRpL50	YES	3	3	0	0	3	NO	NO	NO	NO	NA	NO	4	NA	NA	NA	Male	Male	Male	NA	NA	NA
FBgn0041775	tral	NO	0	0	4	0	4	NO	NO	NO	NO	NA	NO	4	Female	Female	Female	Neither	Neither	Neither	Neither	Neither	Female
FBgn0004893	bowl	YES	2	0	4	2	6	NO	NO	NO	NO	NA	NO	4	Female	Female	Female	Female	Both	Both	Neither	Neither	Neither
FBgn0035400	CG11537	YES	5	0	4	5	9	NO	NO	NO	NO	NA	NO	4	Both	Both	Both	Female	Both	Both	Female	Female	Female
FBgn0030361	CG1492	NO	0	0	1	0	1	NO	NO	NO	NO	NA	NO	1	NA	NA	NA	NA	NA	NA	Female	Neither	NA
FBgn0032085	CG9555	NO	0	0	2	0	2	NO	NO	NO	NO	NA	NO	0	Neither	NA	Neither	Neither	Female	Female	Neither	NA	Neither
FBgn0037918	CG6791	NO	0	0	5	0	5	NO	NO	NO	NO	NA	NO	4	Female	Female	Female	Neither	Female	Female	Neither	Neither	NA
FBgn0016978	snRNP-U1-70K	YES	2	0	2	2	4	NO	NO	NO	NO	NA	NO	4	Both	Both	Female	Neither	Neither	Neither	Neither	Neither	Female
FBgn0262127	kibra	NO	0	0	9	0	9	NO	NO	NO	NO	NA	NO	4	Female	Female	Female	Female	Female	Female	Female	Female	Female
FBgn0040259	Ugt302C1	NO	0	0	3	0	3	NO	NO	YES	NO	NA	NO	4	Neither	Neither	Neither	Neither	Neither	Neither	Female	Female	Female
FBgn0266557	kis	NO	0	0	9	0	9	NO	NO	NO	NO	NA	NO	4	Female	Female	Female	Female	Female	Female	Female	Female	Female
FBgn0034611	MFS16	YES	3	0	1	3	4	NO	NO	NO	NO	NA	NO	4	Both	Both	Both	Neither	Neither	Neither	Neither	Neither	Female
FBgn0029997	CG2258	NO	0	0	1	0	1	NO	NO	NO	NO	NA	NO	4	NA	NA	NA	NA	NA	NA	Neither	Neither	Female
FBgn0086712	Egm	NO	0	0	3	0	3	YES	NO	NO	NO	NA	NO	4	NA	NA	NA	Female	Female	Female	Neither	Neither	Neither
FBgn0001965	Sos	NO	0	0	3	0	3	NO	NO	NO	NO	NA	NO	4	NA	Neither	Neither	Female	Female	Female	Neither	Neither	NA
FBgn0039686	CG15506	YES	1	0	1	1	2	NO	NO	NO	NO	NA	NO	4	Both	Female	Neither	Neither	Neither	Neither	Neither	NA	Neither
FBgn0036958	CG17233	NO	0	0	2	0	2	NO	NO	NO	NO	NA	NO	4	NA	NA	NA	NA	NA	NA	Female	Female	Neither
FBgn0016794	dos	NO	0	0	3	0	3	NO	NO	NO	NO	NA	NO	4	Neither	Neither	Neither	Neither	Neither	Neither	Female	Female	Female
FBgn0052100	CG32100	NO	0	0	1	0	1	NO	NO	NO	NO	NA	NO	2	Neither	Neither	Neither	Neither	Neither	Neither	Female	Neither	Neither
FBgn0261822	Bsg	YES	3	0	1	3	4	NO	YES	YES	NO	NA	YES	4	Both	Both	Both	Neither	Neither	Neither	Neither	Neither	Female
FBgn0031640	Mon1	NO	0	0	3	0	3	NO	NO	NO	NO	NA	NO	4	Neither	Neither	Neither	Female	Female	Female	Neither	Neither	Neither
FBgn0004583	ex	NO	0	0	1	0	1	NO	NO	NO	NO	NA	NO	4	Neither	Neither	Neither	Neither	Neither	Neither	NA	Neither	Female
FBgn0039293	Alg9	YES	3	0	0	3	3	NO	NO	NO	NO	NA	NO	4	Both	Both	Both	NA	NA	NA	Neither	Neither	Neither
FBgn0039131	CG12268	NO	0	0	1	0	1	NO	NO	NO	NO	NA	NO	0	Neither	Neither	Neither	Neither	Neither	Neither	Neither	Neither	Female
FBgn0035989	Atat	YES	3	3	3	0	6	NO	NO	NO	NO	NA	NO	4	Female	Female	Female	Male	Male	Male	Neither	Neither	Neither
FBgn0086686	l(3)L1231	NO	0	0	2	0	2	NO	NO	NO	NO	NA	NO	4	Neither	Neither	Neither	Neither	Neither	Neither	Female	Female	Neither
FBgn0035501	CG1299	YES	3	0	0	3	3	NO	NO	NO	NO	EDC	YES	3	Neither	Neither	Neither	Both	Both	Both	Neither	Neither	Neither
FBgn0041111	lilli	NO	0	0	2	0	2	NO	NO	NO	NO	NA	NO	4	Neither	Neither	Neither	Neither	Neither	Neither	Female	Female	Neither
FBgn0039712	CG15514	NO	0	0	1	0	1	NO	NO	NO	NO	NA	NO	4	Neither	Neither	Neither	Neither	Neither	Neither	Neither	Neither	Female
FBgn0030964	Pvf1	NO	0	0	3	0	3	NO	NO	NO	NO	MC	NO	4	NA	NA	NA	NA	NA	NA	Female	Female	Female
FBgn0029006	Smurf	NO	0	0	2	0	2	NO	NO	NO	NO	NA	NO	4	Neither	Neither	Neither	Neither	Neither	Neither	Female	Female	Neither
FBgn0034387	Cyp12b2	YES	3	0	2	3	5	NO	NO	NO	NO	NA	NO	4	Both	Both	Both	Neither	Neither	Neither	Female	Female	Neither
FBgn0035704	Vps8	YES	5	3	2	2	7	NO	NO	NO	NO	NA	NO	4	Both	Both	Female	Male	Male	Male	Neither	Neither	Female
FBgn0024994	Ugalt	NO	0	0	2	0	2	NO	NO	NO	NO	NA	NO	4	NA	NA	NA	NA	NA	NA	Female	Female	Neither
FBgn0038365	CG9593	NO	0	0	2	0	2	NO	NO	NO	NO	NA	NO	2	Female	NA	Female	NA	NA	Neither	NA	NA	Neither
FBgn0031652	jet	YES	3	0	0	3	3	NO	NO	NO	NO	NA	NO	3	Both	Both	Both	NA	NA	NA	Neither	Neither	Neither
FBgn0000212	brm	NO	0	0	5	0	5	NO	NO	NO	NO	NA	NO	4	Female	Female	Neither	Female	Female	Female	Neither	Neither	Neither
FBgn0051159	mRRF2	NO	0	0	3	0	3	NO	NO	NO	NO	NA	NO	1	Neither	Neither	Neither	Female	Female	Female	Neither	Neither	Neither
FBgn0030349	CG10353	NO	0	0	2	0	2	NO	NO	NO	NO	NA	NO	4	NA	NA	NA	NA	NA	NA	Female	Female	Neither
FBgn0031607	Secp43	NO	0	0	3	0	3	NO	NO	NO	NO	NA	NO	4	Female	Female	Female	NA	NA	NA	Neither	Neither	Neither
FBgn0040273	Spt5	YES	3	0	0	3	3	NO	NO	NO	NO	NA	NO	4	Both	Both	Both	Neither	Neither	Neither	NA	NA	Neither
FBgn0019938	Polr1A	YES	4	0	5	4	9	NO	NO	YES	NO	NA	NO	4	Female	Both	Female	Both	Both	Both	Female	Female	Female
FBgn0035942	ValRS-m	NO	0	0	1	0	1	NO	NO	NO	NO	NA	NO	3	Female	Neither	Neither	Neither	Neither	Neither	Neither	NA	Neither
FBgn0039494	grass	NO	0	0	3	0	3	NO	NO	NO	NO	NA	NO	1	Neither	Neither	Neither	Female	Female	Female	Neither	Neither	Neither
FBgn0039210	CG13625	YES	3	0	2	3	5	NO	NO	NO	NO	NA	NO	0	Both	Both	Both	NA	NA	NA	Female	Female	Neither
FBgn0025519	fidipidine	YES	6	0	1	6	7	NO	NO	NO	NO	NA	NO	4	Both	Both	Both	Both	Both	Both	Neither	Neither	Female
FBgn0031969	pes	NO	0	0	5	0	5	NO	NO	NO	NO	NA	NO	4	Neither	Neither	Neither	Female	Female	Female	Female	Female	NA
FBgn0027610	Dic1	NO	0	0	4	0	4	NO	NO	YES	NO	EDC	YES	4	NA	NA	NA	Female	Female	Female	NA	NA	Female
FBgn0028936	NimB5	NO	0	0	3	0	3	NO	NO	NO	NO	NA	NO	1	Neither	Neither	Neither	Neither	Neither	Neither	Female	Female	Female
FBgn0027616	Ythdc1	NO	0	0	9	0	9	NO	NO	NO	NO	NA	NO	4	Female	Female	Female	Female	Female	Female	Female	Female	Female
FBgn0038832	CG15695	NO	0	0	3	0	3	NO	NO	NO	NO	NA	NO	4	Neither	Neither	Neither	Neither	Neither	Neither	Female	Female	Female
FBgn0032036	CG13384	YES	3	0	0	3	3	NO	NO	NO	NO	NA	NO	4	Neither	Neither	Neither	Both	Both	Both	Neither	Neither	Neither
FBgn0036340	Srrm1	NO	0	0	3	0	3	NO	NO	NO	NO	NA	NO	4	Female	Female	Female	Neither	Neither	Neither	Neither	Neither	Neither
FBgn0027497	Madm	YES	3	0	0	3	3	NO	NO	NO	NO	NA	NO	4	Neither	Neither	Neither	Both	Both	Both	NA	NA	Neither
FBgn0032614	CG13284	NO	0	0	8	0	8	NO	YES	NO	NO	NA	YES	0	Neither	Female	Female	Female	Female	Female	Female	Female	Female
FBgn0033785	Sans	NO	0	0	3	0	3	NO	NO	NO	NO	NA	NO	2	Neither	Neither	Neither	Female	NA	Female	Neither	Female	NA
FBgn0265356	tn	YES	1	0	8	1	9	NO	NO	NO	NO	NA	NO	4	Female	Both	Female	Female	Female	Female	Female	Female	Female
FBgn0035401	Alg2	NO	0	0	5	0	5	NO	YES	NO	NO	NA	YES	4	Female	Female	Female	Neither	Neither	Neither	Female	Female	Neither
FBgn0029882	CG3226	NO	0	0	1	0	1	NO	NO	NO	NO	NA	NO	4	NA	NA	NA	NA	NA	NA	Neither	Neither	Female
FBgn0042213	CG18731	NO	0	0	5	0	5	NO	NO	NO	NO	NA	NO	3	Neither	Neither	Neither	Female	Female	Female	Female	Female	Neither
FBgn0041337	Cyp309a2	NO	0	0	3	0	3	NO	NO	NO	NO	NA	NO	0	Neither	Neither	Neither	Female	Female	Female	Neither	Neither	Neither
FBgn0037297	CG1116	YES	3	0	0	3	3	NO	NO	NO	NO	NA	NO	4	Neither	NA	Neither	Both	Both	Both	Neither	Neither	Neither
FBgn0030787	CG9609	NO	0	0	2	0	2	NO	NO	NO	NO	NA	NO	2	Neither	Neither	NA	Neither	Neither	Neither	Female	Female	NA
FBgn0051342	CG31342	NO	0	0	3	0	3	NO	NO	NO	NO	NA	NO	4	Neither	Female	Female	Neither	Neither	Neither	NA	NA	Female
FBgn0003721	Tm1	NO	0	0	3	0	3	NO	NO	YES	NO	NA	NO	4	Neither	Neither	Neither	Female	Female	Female	Neither	Neither	Neither
FBgn0038679	CG6040	YES	3	3	0	0	3	NO	NO	NO	NO	EDC	NO	4	Neither	Neither	Neither	Male	Male	Male	Neither	Neither	Neither
FBgn0026400	Noa36	NO	0	0	8	0	8	NO	NO	NO	NO	NA	NO	3	Female	Female	Female	Female	Female	Female	Female	Female	NA
FBgn0034051	Mlf	YES	3	0	4	3	7	NO	NO	NO	NO	NA	NO	4	Both	Both	Both	Female	Female	Female	Neither	Neither	Female
FBgn0039705	Atg16	NO	0	0	1	0	1	NO	NO	YES	NO	NA	NO	4	Neither	Neither	Neither	NA	NA	NA	Neither	Neither	Female
FBgn0033526	Caf1-105	NO	0	0	1	0	1	NO	NO	YES	NO	NA	NO	2	Neither	Neither	NA	NA	NA	NA	Neither	Neither	Female
FBgn0035824	CG8281	YES	3	3	1	0	4	NO	NO	NO	NO	NA	NO	2	NA	NA	NA	Male	Male	Male	Neither	Neither	Female
FBgn0001247	Ide	NO	0	0	2	0	2	NO	NO	YES	NO	NA	NO	4	NA	NA	NA	NA	NA	NA	Female	Female	Neither
FBgn0263118	tx	NO	0	0	2	0	2	NO	NO	NO	NO	NA	NO	3	Neither	Neither	Neither	Neither	Female	Female	Neither	Neither	Neither
FBgn0001323	knrl	NO	0	0	1	0	1	NO	NO	NO	NO	NA	NO	0	NA	Female	NA	NA	NA	NA	Neither	NA	NA
FBgn0031952	cdc14	NO	0	0	4	0	4	NO	NO	NO	NO	NA	NO	4	Female	Female	Female	Neither	Neither	Neither	Female	Neither	Neither
FBgn0026324	Taf10b	NO	0	0	2	0	2	NO	NO	NO	NO	NA	NO	4	Neither	Neither	Neither	NA	NA	NA	Female	Female	NA
FBgn0011211	blw	NO	0	0	3	0	3	NO	NO	YES	NO	NA	NO	4	Neither	Neither	Neither	Neither	Neither	Neither	Female	Female	Female
FBgn0003279	RpL4	YES	1	0	2	1	3	NO	NO	YES	NO	NA	NO	4	NA	NA	NA	Female	Female	Both	Neither	Neither	Neither
FBgn0085376	CG34347	NO	0	0	2	0	2	NO	NO	NO	NO	EDC	YES	4	NA	Neither	Female	NA	Neither	Neither	NA	Female	Neither
FBgn0039594	snu	NO	0	0	1	0	1	NO	NO	NO	NO	NA	NO	4	Neither	Neither	Neither	Neither	Neither	Neither	Neither	Neither	Female
FBgn0085370	Pde11	YES	2	0	6	2	8	NO	NO	NO	NO	NA	NO	4	Female	Female	Female	Female	Both	Both	Female	Female	Neither
FBgn0260970	Ubr3	NO	0	0	6	0	6	NO	NO	NO	NO	NA	NO	4	Female	Female	Female	NA	NA	NA	Female	Female	Female
FBgn0034693	flap	YES	3	0	6	3	9	NO	NO	NO	NO	NA	NO	0	Female	Both	Female	Female	Both	Both	Female	Female	Female
FBgn0041579	AttC	NO	0	0	8	0	8	NO	NO	NO	NO	NA	NO	4	Female	Female	Female	Female	Female	Female	Female	Female	Neither
FBgn0003118	pnt	NO	0	0	1	0	1	NO	NO	NO	NO	NA	NO	3	Neither	Female	NA	NA	Neither	Neither	Neither	NA	Neither
FBgn0038640	CG7706	YES	2	2	0	0	2	NO	NO	NO	NO	NA	NO	1	Neither	Neither	Neither	Male	Neither	Male	Neither	Neither	Neither
FBgn0004449	Ten-m	NO	0	0	3	0	3	NO	NO	NO	NO	NA	NO	4	Neither	Female	Neither	Neither	Female	Female	Neither	NA	Neither
FBgn0031638	CG11927	YES	3	0	3	3	6	NO	NO	NO	NO	NA	NO	4	Both	Both	Both	Neither	Neither	Neither	Female	Female	Female
FBgn0259139	glo	NO	0	0	3	0	3	NO	NO	NO	NO	NA	NO	4	Female	Female	Female	Neither	Neither	Neither	Neither	Neither	Neither
FBgn0036341	Syx13	NO	0	0	3	0	3	NO	NO	NO	NO	NA	NO	4	Neither	Neither	Neither	Female	Female	Female	Neither	Neither	Neither
FBgn0032031	CG13390	YES	3	0	1	3	4	NO	NO	NO	NO	NA	NO	2	NA	NA	NA	Both	Both	Both	Neither	Neither	Female
FBgn0039008	CG6972	NO	0	0	2	0	2	NO	NO	NO	NO	NA	NO	4	Neither	Female	Female	Neither	Neither	Neither	Neither	Neither	Neither
FBgn0027611	LManII	YES	3	0	6	3	9	NO	NO	NO	NO	NA	NO	4	Female	Female	Female	Both	Both	Both	Female	Female	Female
FBgn0023081	gek	NO	0	0	3	0	3	NO	NO	YES	NO	NA	NO	4	Neither	Neither	Neither	Female	Female	Female	Neither	Neither	Neither
FBgn0034887	St1	NO	0	0	3	0	3	NO	NO	NO	NO	NA	NO	2	Neither	Neither	Neither	Female	Female	Female	NA	NA	Neither
FBgn0046114	Gclm	NO	0	0	1	0	1	NO	NO	NO	NO	NA	NO	4	NA	NA	NA	NA	NA	NA	NA	NA	Female
FBgn0002887	mus201	YES	2	0	1	2	3	NO	NO	NO	NO	NA	NO	3	Neither	Neither	Neither	Both	Female	Both	Neither	Neither	Neither
FBgn0003301	rut	NO	0	0	3	0	3	NO	NO	NO	NO	NA	NO	4	NA	NA	NA	NA	NA	NA	Female	Female	Female
FBgn0263395	hppy	YES	3	0	5	3	8	NO	NO	NO	NO	NA	NO	4	Both	Both	Female	Female	Female	Both	Female	Female	Neither
FBgn0038197	foxo	YES	3	0	1	3	4	NO	NO	NO	NO	NA	NO	4	Neither	Neither	Neither	Both	Both	Both	Neither	Neither	Female
FBgn0039629	CG11842	YES	3	0	5	3	8	NO	NO	NO	NO	NA	NO	2	Female	Female	Neither	Both	Both	Both	Female	Female	Female
FBgn0024245	dnt	YES	3	0	5	3	8	NO	NO	NO	NO	NA	NO	4	Both	Both	Both	Female	Female	Female	Female	Female	Neither
FBgn0031515	CG9664	NO	0	0	2	0	2	NO	NO	NO	NO	NA	NO	4	NA	NA	NA	NA	NA	NA	Female	Female	Neither
FBgn0264560	garz	YES	3	0	3	3	6	NO	NO	NO	NO	NA	NO	4	Both	Both	Both	Neither	Neither	Neither	Female	Female	Female
FBgn0010747	Srp54k	NO	0	0	6	0	6	NO	NO	NO	NO	NA	NO	4	Female	Female	Female	Neither	Neither	Neither	Female	Female	Female
FBgn0085410	TrissinR	NO	0	0	2	0	2	NO	NO	NO	NO	NA	NO	4	NA	Neither	Neither	Neither	Female	Female	Neither	Neither	Neither
FBgn0262103	Sik3	YES	3	0	2	3	5	NO	NO	NO	NO	NA	NO	4	Both	Both	Both	Neither	Neither	Female	Neither	Female	Neither
FBgn0038299	Spn88Eb	NO	0	0	3	0	3	NO	NO	NO	NO	NA	NO	0	Neither	Neither	Neither	Female	Female	Female	Neither	Neither	Neither
FBgn0034761	CG4250	YES	2	2	0	0	2	NO	NO	NO	NO	NA	NO	0	Neither	Neither	Neither	Neither	Neither	Neither	Male	Male	Neither
FBgn0051343	CG31343	YES	3	3	0	0	3	NO	NO	NO	NO	NA	NO	1	Neither	Neither	NA	Male	Male	Male	NA	Neither	Neither
FBgn0039681	CG7582	NO	0	0	1	0	1	NO	NO	NO	NO	NA	NO	0	NA	Neither	NA	Neither	Neither	Neither	Female	Neither	Neither
FBgn0259237	CG42335	YES	1	1	0	0	1	NO	NO	NO	NO	NA	NO	0	NA	NA	NA	NA	Neither	Male	NA	Neither	Neither
FBgn0283521	lola	YES	3	0	2	3	5	NO	NO	NO	NO	NA	NO	4	Both	Both	Both	NA	NA	NA	Female	Female	Neither
FBgn0038653	Octalpha2R	NO	0	0	2	0	2	NO	NO	NO	NO	NA	NO	4	Neither	Female	NA	Neither	Female	NA	Neither	NA	NA
FBgn0035951	CG5068	NO	0	0	2	0	2	NO	NO	NO	NO	NA	NO	4	Neither	Neither	Neither	Neither	Neither	Neither	Female	Female	NA
FBgn0034564	CG9344	NO	0	0	3	0	3	NO	NO	NO	NO	NA	NO	4	Neither	Neither	Neither	NA	NA	NA	Female	Female	Female
FBgn0028499	CG7985	NO	0	0	6	0	6	NO	NO	NO	NO	NA	NO	4	Female	Female	Female	Neither	Neither	Neither	Female	Female	Female
FBgn0002783	mor	NO	0	0	3	0	3	NO	NO	YES	NO	NA	NO	4	Female	Female	Female	Neither	Neither	Neither	Neither	Neither	Neither
FBgn0037890	CG17734	NO	0	0	1	0	1	NO	NO	NO	NO	NA	NO	4	Neither	Neither	Neither	Neither	Neither	Neither	Neither	Neither	Female
FBgn0035336	CG9004	NO	0	0	6	0	6	NO	NO	NO	NO	NA	NO	1	Female	Female	Female	Neither	Neither	Neither	Female	Female	Female
FBgn0038922	Idh3b	YES	3	0	0	3	3	NO	NO	YES	NO	NA	NO	4	Neither	Neither	Neither	Both	Both	Both	Neither	Neither	Neither
FBgn0035630	CG10576	NO	0	0	5	0	5	NO	NO	NO	NO	NA	NO	4	Female	Female	Female	Neither	Neither	Neither	Female	Female	Neither
FBgn0013272	Gp150	NO	0	0	7	0	7	NO	NO	NO	NO	NA	NO	4	Female	Female	Female	Female	Female	Female	Neither	Neither	Female
FBgn0037894	Ipo9	NO	0	0	4	0	4	NO	NO	NO	NO	NA	NO	4	Female	Female	Female	Neither	Neither	Neither	Neither	NA	Female
FBgn0038353	CG5399	YES	1	1	0	0	1	NO	NO	NO	NO	NA	NO	2	NA	NA	NA	Neither	Neither	Male	NA	NA	NA
FBgn0038419	CG14879	NO	0	0	2	0	2	NO	NO	NO	NO	NA	NO	4	Neither	Neither	Neither	Neither	Neither	Neither	Female	Female	Neither
FBgn0015376	cutlet	NO	0	0	1	0	1	NO	NO	NO	NO	NA	NO	2	NA	Neither	NA	Female	Neither	Neither	NA	NA	NA
FBgn0262560	wcd	NO	0	0	8	0	8	NO	NO	NO	NO	NA	NO	4	Female	Female	Female	Female	Female	Female	Female	Female	Neither
FBgn0270924	zf30C	NO	0	0	6	0	6	NO	NO	NO	NO	NA	NO	4	Female	Female	Female	Female	Female	Female	NA	NA	Neither
FBgn0028689	Rpn6	YES	1	1	0	0	1	NO	NO	NO	NO	NA	NO	4	Neither	Neither	Male	Neither	Neither	Neither	Neither	Neither	Neither
FBgn0034392	MFS15	NO	0	0	1	0	1	NO	NO	NO	NO	NA	NO	4	Neither	Neither	Neither	Neither	Neither	Neither	Neither	Neither	Female
FBgn0036875	CG9449	NO	0	0	2	0	2	NO	NO	NO	NO	NA	NO	3	Neither	Neither	Neither	Female	Neither	Female	Neither	Neither	Neither
FBgn0029175	sotv	NO	0	0	9	0	9	NO	NO	NO	NO	NA	NO	4	Female	Female	Female	Female	Female	Female	Female	Female	Female
FBgn0031879	uif	YES	2	0	7	2	9	NO	NO	NO	NO	NA	NO	0	Both	Both	Female	Female	Female	Female	Female	Female	Female
FBgn0038869	Smyd5	NO	0	0	6	0	6	NO	NO	NO	NO	NA	NO	2	Female	Female	Female	Neither	Neither	Neither	Female	Female	Female
FBgn0031322	CG5001	NO	0	0	3	0	3	NO	NO	NO	NO	NA	NO	4	Neither	Neither	Neither	Female	Female	Female	Neither	Neither	Neither
FBgn0034031	CG12963	NO	0	0	2	0	2	NO	NO	NO	NO	NA	NO	1	Neither	Neither	NA	Neither	Female	Female	NA	Neither	NA
FBgn0262476	CG43066	YES	4	2	0	2	4	NO	NO	NO	NO	NA	NO	4	NA	Both	Neither	Male	Both	Male	Neither	NA	Neither
FBgn0035227	Iml1	NO	0	0	9	0	9	NO	NO	NO	NO	NA	NO	4	Female	Female	Female	Female	Female	Female	Female	Female	Female
FBgn0263601	mib1	YES	3	0	0	3	3	NO	NO	NO	NO	NA	NO	4	Both	Both	Both	Neither	Neither	Neither	Neither	Neither	Neither
FBgn0027085	LeuRS-m	NO	0	0	9	0	9	NO	NO	NO	NO	NA	NO	4	Female	Female	Female	Female	Female	Female	Female	Female	Female
FBgn0010651	MFS14	NO	0	0	4	0	4	NO	NO	NO	NO	NA	NO	4	Female	Female	Female	Neither	Neither	Neither	Female	Neither	Neither
FBgn0032770	CG13086	NO	0	0	3	0	3	NO	NO	NO	NO	NA	NO	1	Female	Neither	Neither	Neither	Neither	Neither	Neither	Female	Female
FBgn0031975	Tg	YES	3	0	3	3	6	NO	NO	NO	NO	NA	NO	4	Female	Female	Female	Both	Both	Both	Neither	Neither	Neither
FBgn0243514	eater	NO	0	0	4	0	4	NO	NO	NO	NO	NA	NO	1	Neither	Female	NA	Female	Female	Neither	Female	NA	NA
FBgn0025865	Cortactin	NO	0	0	6	0	6	NO	NO	NO	NO	NA	NO	4	Neither	Neither	Neither	Female	Female	Female	Female	Female	Female
FBgn0005642	wdn	NO	0	0	8	0	8	NO	NO	NO	NO	NA	NO	3	Female	Female	Female	Female	Female	Female	Female	Female	Neither
FBgn0033904	CG18327	YES	2	0	1	2	3	NO	NO	NO	NO	NA	NO	0	NA	NA	NA	Both	Female	Both	Neither	Neither	Neither
FBgn0039590	CG10011	YES	2	0	4	2	6	NO	NO	YES	NO	NA	NO	4	Neither	Neither	Neither	Female	Both	Both	Female	Female	Female
FBgn0027583	CG7601	NO	0	0	3	0	3	NO	NO	NO	NO	NA	NO	4	Female	Female	Female	Neither	Neither	Neither	Neither	Neither	Neither
FBgn0003520	stau	YES	3	0	0	3	3	NO	NO	NO	NO	NA	NO	4	Both	Both	Both	Neither	Neither	Neither	Neither	Neither	Neither
FBgn0023479	teq	NO	0	0	6	0	6	NO	NO	NO	NO	NA	NO	4	Female	Female	Female	NA	NA	NA	Female	Female	Female
FBgn0033246	ACC	YES	2	0	5	2	7	NO	NO	YES	NO	NA	NO	4	Female	Neither	Neither	Both	Female	Both	Female	Female	Female
FBgn0031437	Arpc5	NO	0	0	4	0	4	NO	NO	NO	NO	NA	NO	4	Female	Female	Neither	Neither	Neither	Neither	Female	Neither	Female
FBgn0033750	CG13151	YES	1	0	2	1	3	NO	NO	NO	NO	NA	NO	2	Female	Both	Female	Neither	Neither	Neither	Neither	Neither	Neither
FBgn0264776	CG44014	NO	0	0	1	0	1	NO	NO	NO	NO	NA	NO	0	Neither	Neither	Neither	Neither	Female	Neither	NA	NA	Neither
FBgn0032026	CG7627	YES	2	0	6	2	8	NO	NO	NO	NO	NA	NO	4	Both	Both	Female	Female	Female	Female	Female	Female	Neither
FBgn0042138	Apt1	NO	0	0	6	0	6	NO	NO	YES	NO	NA	NO	4	Female	Female	Female	Female	Female	Female	Neither	Neither	Neither
FBgn0036365	cmb	YES	3	1	3	2	6	NO	NO	NO	NO	NA	NO	4	Female	Female	Female	Male	Both	Both	Neither	Neither	Neither
FBgn0010406	RNaseX25	NO	0	0	3	0	3	YES	NO	NO	NO	NA	NO	4	Female	Female	Female	NA	NA	NA	NA	NA	Neither
FBgn0000592	Est-6	NO	0	0	2	0	2	YES	NO	NO	NO	EDC	NO	4	Neither	Neither	Neither	NA	NA	NA	Female	Female	Neither
FBgn0039678	Obp99a	NO	0	0	5	0	5	NO	NO	NO	NO	NA	NO	3	Female	Female	Female	Neither	Neither	Neither	Female	Female	NA
FBgn0032020	strat	NO	0	0	3	0	3	NO	NO	NO	NO	NA	NO	4	Neither	Neither	Neither	Neither	Neither	Neither	Female	Female	Female
FBgn0026404	Dronc	NO	0	0	5	0	5	NO	NO	NO	NO	NA	NO	4	Female	Female	Female	Neither	Neither	Neither	Female	Female	Neither
FBgn0019932	SamDC	NO	0	0	9	0	9	NO	NO	NO	NO	EDC	YES	4	Female	Female	Female	Female	Female	Female	Female	Female	Female
FBgn0264693	ens	YES	1	0	4	1	5	NO	NO	YES	NO	NA	NO	4	Both	Female	Female	Neither	Neither	Neither	Female	Female	Neither
FBgn0036096	CG8003	NO	0	0	2	0	2	NO	NO	YES	NO	NA	NO	4	Neither	Neither	Neither	Neither	Neither	Neither	Female	Female	NA
FBgn0283536	Vha13	NO	0	0	5	0	5	NO	NO	YES	NO	NA	NO	4	Female	Female	Female	Neither	Neither	Neither	Female	Female	Neither
FBgn0262614	pyd	NO	0	0	3	0	3	NO	NO	NO	NO	NA	NO	4	Neither	Neither	Neither	Female	Female	Female	Neither	Neither	Neither
FBgn0032782	Rab9	NO	0	0	3	0	3	NO	NO	NO	NO	NA	NO	4	Neither	Neither	Neither	Neither	Neither	Neither	Female	Female	Female
FBgn0023407	B4	NO	0	0	2	0	2	NO	NO	NO	NO	NA	NO	4	Neither	Neither	Neither	Neither	Neither	Neither	Female	Female	Neither
FBgn0259985	Mppe	NO	0	0	9	0	9	NO	NO	NO	NO	NA	NO	4	Female	Female	Female	Female	Female	Female	Female	Female	Female
FBgn0039156	CG6178	NO	0	0	4	0	4	NO	NO	NO	NO	NA	NO	4	Neither	Neither	Neither	Female	Female	Female	Neither	Neither	Female
FBgn0033177	CG11141	NO	0	0	5	0	5	NO	NO	NO	NO	NA	NO	4	Neither	Neither	Neither	Female	Female	Female	Female	Female	Neither
FBgn0036623	Agpat3	NO	0	0	1	0	1	NO	NO	NO	NO	NA	NO	4	Neither	Neither	Neither	Neither	Neither	Neither	Neither	Neither	Female
FBgn0015000	betaggt-I	YES	3	0	2	3	5	NO	NO	NO	NO	NA	NO	4	Both	Both	Both	NA	NA	NA	Female	Female	Neither
FBgn0033252	CG12769	NO	0	0	3	0	3	NO	NO	NO	NO	NA	NO	2	Neither	Neither	Neither	Female	Female	Female	Neither	Neither	Neither
FBgn0033742	Nepl10	YES	2	0	1	2	3	NO	NO	NO	NO	NA	NO	0	Female	Neither	NA	Both	Neither	Both	Neither	Neither	Neither
FBgn0033757	muskelin	NO	0	0	6	0	6	NO	NO	NO	NO	NA	NO	4	Neither	Neither	Neither	Female	Female	Female	Female	Female	Female
FBgn0038223	Afti	YES	1	0	6	1	7	NO	NO	NO	NO	NA	NO	4	Female	Both	Female	Female	Female	Female	Neither	Neither	Female
FBgn0039776	PH4alphaEFB	YES	3	0	2	3	5	NO	NO	NO	NO	NA	NO	4	Neither	Neither	Neither	Both	Both	Both	Female	Female	Neither
FBgn0035827	Srp9	YES	3	0	0	3	3	NO	NO	NO	NO	NA	NO	4	Both	Both	Both	NA	NA	NA	NA	NA	Neither
FBgn0020445	E23	NO	0	0	1	0	1	NO	NO	NO	NO	SC	NO	4	Neither	Neither	Neither	Neither	Neither	Neither	Neither	Neither	Female
FBgn0051116	ClC-a	YES	6	0	0	6	6	NO	NO	NO	NO	MC	YES	4	Both	Both	Both	Both	Both	Both	Neither	Neither	Neither
FBgn0034791	EMC8-9	NO	0	0	5	0	5	NO	NO	NO	NO	NA	NO	4	Female	Female	Female	NA	NA	NA	Female	Female	Neither
FBgn0026433	Grip128	NO	0	0	3	0	3	NO	NO	NO	NO	NA	NO	3	Female	Female	Female	NA	NA	NA	Neither	Neither	Neither
FBgn0010452	trn	YES	1	0	0	1	1	NO	NO	NO	NO	NA	NO	4	Neither	Neither	Neither	Neither	Neither	Both	Neither	Neither	Neither
FBgn0032596	Prosbeta4	YES	3	0	0	3	3	NO	NO	YES	NO	NA	NO	4	NA	NA	NA	Both	Both	Both	Neither	Neither	NA
FBgn0003090	pk	NO	0	0	1	0	1	NO	NO	NO	NO	NA	NO	3	NA	Neither	NA	Neither	Neither	Neither	Female	NA	Neither
FBgn0036105	Blos4	YES	1	1	0	0	1	NO	NO	NO	NO	NA	NO	3	Neither	Neither	Neither	Neither	Neither	Male	Neither	Neither	Neither
FBgn0050115	GEFmeso	YES	1	0	5	1	6	NO	NO	NO	NO	NA	NO	4	Female	Both	Female	Neither	Neither	Neither	Female	Female	Female
FBgn0038083	Ugt37A3	NO	0	0	2	0	2	NO	NO	NO	NO	NA	NO	0	Neither	Neither	Neither	Neither	Neither	Neither	Female	Female	Neither
FBgn0000038	nAChRbeta1	NO	0	0	1	0	1	NO	NO	NO	NO	NA	NO	0	NA	Neither	NA	NA	Female	NA	NA	NA	NA
FBgn0031904	CG5149	NO	0	0	7	0	7	NO	NO	NO	NO	NA	NO	4	Female	Female	Female	Female	Female	Female	Neither	Neither	Female
FBgn0011692	pav	YES	2	2	0	0	2	NO	NO	NO	NO	NA	NO	0	NA	NA	NA	Male	Male	Neither	NA	NA	NA
FBgn0039026	CG7029	NO	0	0	5	0	5	NO	NO	NO	NO	NA	NO	4	Female	Female	Neither	Female	Female	Female	Neither	Neither	Neither
FBgn0052649	Coq8	NO	0	0	1	0	1	NO	NO	YES	NO	NA	NO	4	NA	NA	NA	NA	NA	NA	Neither	Neither	Female
FBgn0032189	Ripalpha	NO	0	0	1	0	1	NO	NO	NO	NO	NA	NO	3	Neither	Neither	Neither	Neither	Neither	Neither	Female	Neither	Neither
FBgn0034986	mRpS17	YES	3	2	1	1	4	NO	NO	NO	NO	NA	NO	4	Female	Neither	Neither	Both	Male	Male	NA	Neither	NA
FBgn0038424	Fntb	YES	2	0	1	2	3	NO	NO	NO	NO	NA	NO	4	Both	Both	Female	NA	NA	NA	NA	NA	NA
FBgn0020887	Su(z)12	NO	0	0	1	0	1	NO	NO	NO	NO	NA	NO	4	NA	NA	NA	Neither	Neither	Female	Neither	Neither	NA
FBgn0038167	Lkb1	NO	0	0	3	0	3	NO	NO	NO	NO	NA	NO	4	Neither	Neither	Neither	Female	Female	Female	Neither	Neither	Neither
FBgn0030768	Nemp	NO	0	0	1	0	1	NO	NO	NO	NO	NA	NO	4	NA	NA	NA	Neither	Neither	Neither	Neither	Neither	Female
FBgn0034662	CG13492	NO	0	0	3	0	3	NO	NO	NO	NO	NA	NO	0	Neither	NA	NA	Female	Female	Female	NA	NA	NA
FBgn0038530	AttD	NO	0	0	6	0	6	NO	NO	NO	NO	NA	NO	1	Female	Female	NA	Female	Neither	Female	Female	Neither	Female
FBgn0041181	Tep3	YES	5	0	1	5	6	NO	NO	NO	NO	NA	NO	2	Both	Both	Both	Female	Both	Both	Neither	Neither	NA
FBgn0033206	DCTN4-p62	NO	0	0	1	0	1	NO	NO	NO	NO	NA	NO	4	Neither	Neither	Neither	Neither	Neither	Neither	Neither	Neither	Female
FBgn0035532	CG15014	YES	3	0	0	3	3	NO	NO	NO	NO	NA	NO	4	Both	Both	Both	Neither	Neither	Neither	NA	NA	Neither
FBgn0050043	CG30043	NO	0	0	3	0	3	NO	NO	NO	NO	NA	NO	0	NA	NA	NA	NA	Female	Female	NA	NA	Female
FBgn0266756	btsz	NO	0	0	6	0	6	NO	NO	YES	NO	NA	NO	4	Female	Female	Female	Neither	Neither	Neither	Female	Female	Female
FBgn0028540	CG9008	NO	0	0	9	0	9	NO	NO	YES	NO	NA	NO	3	Female	Female	Female	Female	Female	Female	Female	Female	Female
FBgn0259221	ATP8A	YES	6	0	1	6	7	NO	NO	NO	NO	NA	NO	4	Both	Both	Both	Both	Both	Both	Neither	Neither	Female
FBgn0041630	Hexo1	YES	4	0	3	4	7	NO	NO	NO	NO	NA	NO	4	Both	Female	Female	Both	Both	Both	NA	NA	Female
FBgn0035528	CG15012	NO	0	0	7	0	7	NO	NO	NO	NO	NA	NO	4	Female	Female	Female	Female	Female	Female	NA	NA	Female
FBgn0043458	CG12084	NO	0	0	4	0	4	NO	NO	NO	NO	NA	NO	4	Neither	Female	Neither	Female	Female	Female	Neither	Neither	Neither
FBgn0032835	CG16772	NO	0	0	3	0	3	NO	YES	NO	NO	NA	YES	3	Female	Female	Female	Neither	Neither	Neither	Neither	Neither	Neither
FBgn0032156	CG13124	YES	3	0	3	3	6	NO	NO	NO	NO	NA	NO	4	Neither	Neither	Neither	Both	Both	Both	Female	Female	Female
FBgn0034418	CG15118	YES	3	0	0	3	3	NO	NO	NO	NO	NA	NO	4	Both	Both	Both	Neither	Neither	Neither	Neither	Neither	Neither
FBgn0035533	Cip4	NO	0	0	7	0	7	NO	NO	NO	NO	NA	NO	4	Female	Female	Female	Female	Female	Female	Neither	Neither	Female
FBgn0052296	Mrtf	NO	0	0	1	0	1	NO	NO	NO	NO	NA	NO	4	Neither	Neither	Neither	Neither	Female	Neither	Neither	Neither	Neither
FBgn0004381	Klp68D	NO	0	0	3	0	3	NO	NO	NO	NO	NA	NO	4	Female	Female	Female	Neither	Neither	Neither	Neither	Neither	Neither
FBgn0039761	CG18404	YES	2	2	0	0	2	NO	NO	NO	NO	NA	NO	0	NA	NA	NA	Neither	Male	Male	NA	NA	Neither
FBgn0027790	GV1	NO	0	0	6	0	6	NO	NO	NO	NO	NA	NO	0	Female	Female	Female	Female	Female	Female	Neither	Neither	Neither
FBgn0032363	Dlg5	NO	0	0	4	0	4	NO	NO	NO	NO	NA	NO	4	Neither	Female	Female	Neither	Female	Female	Neither	Neither	Neither
FBgn0013718	nuf	YES	3	0	6	3	9	NO	NO	NO	NO	NA	NO	4	Both	Both	Both	Female	Female	Female	Female	Female	Female
FBgn0038720	CG6231	NO	0	0	2	0	2	NO	NO	NO	NO	NA	NO	4	Neither	Neither	Neither	Neither	Neither	Neither	Female	Female	Neither
FBgn0261064	Rbsn-5	NO	0	0	2	0	2	NO	NO	NO	NO	NA	NO	3	Neither	Neither	Neither	Neither	Neither	Neither	Female	Female	Neither
FBgn0039564	Nep7	NO	0	0	2	0	2	NO	NO	NO	NO	NA	NO	1	Neither	Neither	NA	Female	Neither	Female	Neither	NA	Neither
FBgn0032512	Bdp1	NO	0	0	7	0	7	NO	NO	NO	NO	NA	NO	4	Female	Female	Female	Female	Female	Female	Neither	Neither	Female
FBgn0034629	Acox57D-d	NO	0	0	1	0	1	NO	NO	NO	NO	NA	NO	2	NA	NA	NA	NA	NA	NA	Neither	Neither	Female
FBgn0036450	Tdrd3	NO	0	0	3	0	3	NO	NO	NO	NO	NA	NO	4	Neither	Neither	Neither	Female	Female	Female	Neither	Neither	Neither
FBgn0031548	CG8852	NO	0	0	5	0	5	NO	NO	NO	NO	NA	NO	4	NA	Female	Female	Neither	Female	Female	Female	Neither	Neither
FBgn0030805	wus	NO	0	0	4	0	4	NO	NO	NO	NO	NA	NO	1	Female	Female	NA	Female	Female	Neither	Neither	Neither	NA
FBgn0036695	Papst2	NO	0	0	1	0	1	NO	NO	NO	NO	NA	NO	4	Female	Neither	Neither	Neither	Neither	Neither	Neither	Neither	Neither
FBgn0004512	Mdr49	NO	0	0	2	0	2	NO	NO	NO	NO	NA	NO	1	NA	Neither	NA	Neither	Neither	Neither	Female	Female	Neither
FBgn0026315	Ugt35A1	NO	0	0	3	0	3	NO	NO	NO	NO	NA	NO	4	Female	Female	Female	Neither	Neither	Neither	Neither	Neither	Neither
FBgn0259937	Nop60B	YES	2	0	1	2	3	NO	NO	NO	NO	NA	NO	4	Neither	Neither	Neither	Both	Both	Female	Neither	Neither	NA
FBgn0026432	Grip163	YES	2	2	1	0	3	NO	NO	NO	NO	NA	NO	2	Neither	Female	NA	Neither	Male	Male	NA	NA	NA
FBgn0000578	ena	YES	3	0	2	3	5	NO	NO	NO	NO	NA	NO	4	Both	Both	Both	Neither	Neither	Neither	Female	Female	Neither
FBgn0027509	TBCD	NO	0	0	1	0	1	NO	NO	NO	NO	NA	NO	4	Neither	Neither	NA	Neither	Neither	Neither	Neither	Neither	Female
FBgn0050021	metro	NO	0	0	2	0	2	NO	NO	NO	NO	NA	NO	4	NA	NA	NA	NA	NA	NA	Female	Female	Neither
FBgn0027518	Wdr24	NO	0	0	6	0	6	NO	NO	NO	NO	NA	NO	2	Female	Female	Female	Neither	Neither	Neither	Female	Female	Female
FBgn0038585	Non3	NO	0	0	3	0	3	NO	NO	NO	NO	NA	NO	3	Neither	Neither	Neither	Neither	Neither	Neither	Female	Female	Female
FBgn0026619	Taz	NO	0	0	1	0	1	NO	NO	NO	NO	NA	NO	4	Neither	Neither	Neither	Neither	Neither	Neither	Neither	Neither	Female
FBgn0033846	mip120	NO	0	0	5	0	5	NO	NO	NO	NO	NA	NO	4	Neither	Neither	Neither	Female	Female	Female	Female	Female	Neither
FBgn0032859	Arpc2	NO	0	0	1	0	1	NO	NO	NO	NO	NA	NO	4	NA	NA	NA	NA	NA	NA	NA	NA	Female
FBgn0035544	CG15021	NO	0	0	1	0	1	NO	NO	NO	NO	NA	NO	0	NA	Neither	Neither	NA	Neither	Neither	Female	Neither	Neither
FBgn0033928	Arc2	NO	0	0	1	0	1	NO	NO	NO	NO	NA	NO	4	NA	NA	NA	NA	NA	NA	Neither	Neither	Female
FBgn0038238	CG14854	NO	0	0	4	0	4	NO	NO	NO	NO	NA	NO	0	Female	Female	Female	Neither	Neither	Neither	NA	Female	NA
FBgn0011693	Pdh	YES	2	0	0	2	2	NO	NO	NO	NO	NA	NO	4	Neither	Both	Both	Neither	Neither	Neither	Neither	Neither	Neither
FBgn0000261	Cat	NO	0	0	9	0	9	NO	NO	YES	NO	NA	NO	4	Female	Female	Female	Female	Female	Female	Female	Female	Female
FBgn0027929	NimB1	NO	0	0	1	0	1	NO	NO	NO	NO	NA	NO	0	Neither	Neither	NA	Neither	Neither	Neither	Female	Neither	Neither
FBgn0053926	CG33926	NO	0	0	6	0	6	NO	NO	NO	NO	NA	NO	4	Female	Female	Female	Female	Female	Female	Neither	Neither	Neither
FBgn0050263	stum	NO	0	0	1	0	1	NO	NO	NO	NO	NA	NO	0	NA	NA	Female	NA	NA	NA	NA	Neither	NA
FBgn0259243	Pka-R1	NO	0	0	7	0	7	NO	NO	NO	NO	NA	NO	4	Female	Female	Female	Female	Female	Female	Neither	Neither	Female
FBgn0261456	hpo	YES	2	0	7	2	9	NO	NO	NO	NO	NA	NO	4	Both	Both	Female	Female	Female	Female	Female	Female	Female
FBgn0011286	RyR	NO	0	0	2	0	2	NO	NO	YES	NO	NA	NO	4	NA	Female	Neither	Neither	Female	Neither	NA	NA	Neither
FBgn0050089	CG30089	YES	1	0	0	1	1	NO	NO	NO	NO	NA	NO	4	Neither	Both	NA	Neither	Neither	Neither	Neither	NA	NA
FBgn0037370	CG1236	NO	0	0	1	0	1	NO	NO	YES	NO	NA	NO	4	NA	NA	NA	NA	NA	NA	NA	NA	Female
FBgn0020616	SA	NO	0	0	1	0	1	NO	NO	NO	NO	NA	NO	4	Neither	Neither	Neither	Neither	Neither	Neither	Neither	Neither	Female
FBgn0264491	how	NO	0	0	2	0	2	NO	NO	NO	NO	NA	NO	4	Neither	Neither	Neither	Neither	Neither	Neither	Female	Female	Neither
FBgn0034008	CG8152	NO	0	0	9	0	9	NO	NO	NO	NO	NA	NO	4	Female	Female	Female	Female	Female	Female	Female	Female	Female
FBgn0028422	GluRIID	NO	0	0	2	0	2	NO	NO	NO	NO	NA	NO	3	NA	Neither	NA	Neither	Female	Female	Neither	NA	NA
FBgn0286070	cnk	NO	0	0	5	0	5	NO	NO	NO	NO	NA	NO	4	Neither	Neither	Neither	Female	Female	Female	Female	Female	Neither
FBgn0051072	Lerp	NO	0	0	9	0	9	NO	NO	NO	NO	NA	NO	4	Female	Female	Female	Female	Female	Female	Female	Female	Female
FBgn0023172	RhoGEF2	YES	6	0	0	6	6	NO	NO	NO	NO	NA	NO	4	Both	Both	Both	Both	Both	Both	Neither	Neither	Neither
FBgn0039031	Gbp3	NO	0	0	3	0	3	NO	NO	NO	NO	NA	NO	2	Neither	Neither	Neither	Female	Female	Female	Neither	Neither	Neither
FBgn0051637	CG31637	NO	0	0	8	0	8	NO	NO	NO	NO	NA	NO	4	Female	Female	Female	Neither	Female	Female	Female	Female	Female
FBgn0032211	CG13138	NO	0	0	2	0	2	NO	NO	NO	NO	NA	NO	0	NA	Female	Female	NA	Neither	Neither	NA	NA	Neither
FBgn0031489	CG17224	NO	0	0	1	0	1	NO	NO	NO	NO	NA	NO	4	Neither	Neither	Neither	Neither	Neither	Neither	Neither	Neither	Female
FBgn0015618	Cdk8	YES	3	3	0	0	3	NO	NO	NO	NO	NA	NO	1	Neither	Neither	Neither	Male	Male	Male	Neither	Neither	Neither
FBgn0011774	Irbp	YES	3	0	1	3	4	NO	NO	NO	NO	NA	NO	3	Both	Both	Both	Neither	Neither	Neither	Neither	Neither	Female
FBgn0034143	CG8303	NO	0	0	2	0	2	NO	NO	NO	NO	NA	NO	3	NA	NA	NA	NA	Female	Neither	Female	Neither	NA
FBgn0085478	Zdhhc8	NO	0	0	1	0	1	NO	NO	NO	NO	SC	NO	4	NA	NA	NA	NA	NA	NA	Neither	Neither	Female
FBgn0033402	Myd88	YES	3	0	1	3	4	NO	NO	NO	NO	NA	NO	4	Both	Both	Both	Neither	Neither	Neither	Neither	Neither	Female
FBgn0035540	Syx17	NO	0	0	4	0	4	NO	NO	NO	NO	NA	NO	3	Female	Female	Female	Neither	Neither	Neither	Neither	Neither	Female
FBgn0030809	Ubr1	NO	0	0	8	0	8	NO	NO	NO	NO	NA	NO	4	Female	Female	Female	Female	Female	Female	Female	Female	Neither
FBgn0033638	CG9005	YES	2	0	3	2	5	NO	NO	NO	NO	NA	NO	4	NA	NA	NA	Female	Both	Both	Female	Female	Neither
FBgn0022787	Hel89B	YES	3	0	3	3	6	NO	NO	NO	NO	NA	NO	4	Both	Both	Both	Female	Neither	Female	Neither	Neither	Female
FBgn0004868	Gdi	YES	3	0	3	3	6	NO	NO	NO	NO	NA	NO	4	Neither	Neither	Neither	Both	Both	Both	Female	Female	Female
FBgn0034859	CG3520	YES	3	0	4	3	7	NO	NO	NO	NO	NA	NO	2	Female	Female	Female	Both	Both	Both	NA	Female	Neither
FBgn0267376	SelR	NO	0	0	1	0	1	NO	NO	NO	NO	NA	NO	4	Neither	Female	Neither	Neither	Neither	Neither	Neither	Neither	Neither
FBgn0031450	Hrs	NO	0	0	4	0	4	NO	NO	NO	NO	NA	NO	4	Neither	Neither	Neither	Female	Female	Female	Neither	Neither	Female
FBgn0031456	Tnpo-SR	NO	0	0	3	0	3	NO	NO	NO	NO	NA	NO	4	Neither	Neither	Neither	Female	Female	Female	Neither	Neither	Neither
FBgn0033844	bbc	NO	0	0	2	0	2	NO	NO	NO	NO	NA	NO	4	Neither	Neither	Neither	Neither	Neither	Neither	Female	Female	Neither
FBgn0034491	Hsl	YES	3	0	3	3	6	NO	NO	NO	NO	NA	NO	4	Neither	Neither	Neither	Both	Both	Both	Female	Female	Female
FBgn0015391	glu	NO	0	0	1	0	1	NO	NO	YES	NO	NA	NO	1	Female	Neither	Neither	Neither	Neither	Neither	Neither	Neither	Neither
FBgn0053087	LRP1	NO	0	0	2	0	2	NO	NO	NO	NO	NA	NO	4	Neither	Neither	Neither	Female	Female	Neither	Neither	Neither	Neither
FBgn0035337	CG15877	YES	3	0	6	3	9	NO	NO	NO	NO	NA	NO	2	Female	Female	Female	Both	Both	Both	Female	Female	Female
FBgn0029147	NtR	YES	2	0	6	2	8	NO	NO	NO	NO	NA	NO	1	Both	Both	Neither	Female	Female	Female	Female	Female	Female
FBgn0027505	Rab3-GAP	YES	3	0	2	3	5	NO	NO	NO	NO	NA	NO	4	Neither	Neither	Neither	Both	Both	Both	Female	Female	Neither
FBgn0288232	Cyp6a21	YES	2	0	1	2	3	NO	NO	NO	NO	NA	NO	4	Both	Both	Neither	Neither	Neither	Neither	Female	Neither	Neither
FBgn0000562	egl	NO	0	0	6	0	6	NO	NO	NO	NO	NA	NO	4	Female	Female	Female	Neither	Neither	Neither	Female	Female	Female
FBgn0261800	LanB1	YES	2	0	7	2	9	NO	NO	YES	NO	NA	NO	4	Female	Female	Female	Both	Both	Female	Female	Female	Female
FBgn0034939	thoc5	YES	3	3	0	0	3	NO	NO	NO	NO	NA	NO	3	Male	Male	Male	Neither	Neither	Neither	Neither	Neither	Neither
FBgn0032136	Apoltp	YES	2	0	6	2	8	NO	NO	NO	NO	NA	NO	4	Female	Female	Female	Both	Female	Both	Female	Female	Neither
FBgn0031399	mio	NO	0	0	3	0	3	NO	NO	NO	NO	NA	NO	4	Neither	Neither	Neither	Female	Female	Female	Neither	Neither	Neither
FBgn0050460	CG30460	NO	0	0	6	0	6	NO	NO	NO	NO	NA	NO	4	Female	Female	Female	Female	Female	Neither	Neither	Neither	Female
FBgn0032629	beat-IIIc	NO	0	0	2	0	2	NO	NO	NO	NO	MC	YES	4	NA	Female	Neither	NA	Neither	NA	Female	Neither	NA
FBgn0265575	yin	NO	0	0	1	0	1	NO	NO	NO	NO	MC	NO	4	NA	NA	NA	NA	NA	NA	NA	NA	Female
FBgn0037897	CG5270	YES	1	0	2	1	3	NO	NO	YES	NO	NA	NO	4	Both	Female	Female	Neither	Neither	Neither	Neither	Neither	Neither
FBgn0036734	CG7564	NO	0	0	9	0	9	NO	NO	NO	NO	NA	NO	4	Female	Female	Female	Female	Female	Female	Female	Female	Female
FBgn0038074	Gnmt	YES	1	0	2	1	3	NO	NO	NO	NO	NA	NO	4	Both	Female	Female	Neither	Neither	Neither	NA	NA	Neither
FBgn0036454	CG17839	YES	3	3	0	0	3	NO	NO	NO	NO	NA	NO	4	Neither	Neither	Neither	Male	Male	Male	Neither	Neither	Neither
FBgn0260486	Ziz	NO	0	0	1	0	1	NO	NO	NO	NO	NA	NO	4	Neither	Female	Neither	Neither	Neither	Neither	Neither	Neither	Neither
FBgn0264855	AP-2alpha	NO	0	0	8	0	8	NO	NO	NO	NO	NA	NO	4	Female	Female	Female	Female	Female	Female	Female	Female	NA
FBgn0039560	BOD1	NO	0	0	2	0	2	NO	NO	NO	NO	NA	NO	4	Neither	Neither	Neither	Neither	Neither	Neither	Female	Female	Neither
FBgn0270927	betaGlu	NO	0	0	6	0	6	NO	NO	NO	NO	NA	NO	4	Female	Female	Female	Female	Female	Female	Neither	Neither	Neither
FBgn0039048	CG17111	NO	0	0	4	0	4	NO	NO	NO	NO	NA	NO	4	NA	NA	NA	Female	Female	Female	Neither	Neither	Female
FBgn0032409	Ced-12	NO	0	0	3	0	3	NO	NO	NO	NO	NA	NO	4	Neither	Neither	Neither	Neither	Neither	Neither	Female	Female	Female
FBgn0033875	CG6357	YES	3	0	0	3	3	YES	NO	NO	NO	NA	NO	4	Both	Both	Both	Neither	Neither	Neither	Neither	Neither	Neither
FBgn0039566	CG4849	NO	0	0	3	0	3	NO	NO	NO	NO	NA	NO	4	Female	Female	Female	Neither	Neither	Neither	Neither	Neither	Neither
FBgn0262872	milt	YES	3	0	4	3	7	NO	NO	NO	NO	NA	NO	4	Female	Female	Female	Both	Both	Both	Neither	Neither	Female
FBgn0027057	CSN1b	NO	0	0	5	0	5	NO	NO	NO	NO	NA	NO	4	Female	Female	Female	Neither	Neither	Neither	Female	Female	Neither
FBgn0036301	CG4069	NO	0	0	6	0	6	NO	NO	NO	NO	NA	NO	4	Female	Female	Female	Female	Female	Female	Neither	Neither	Neither
FBgn0050085	Rif1	NO	0	0	3	0	3	NO	NO	NO	NO	NA	NO	3	NA	Neither	NA	Female	Female	Female	NA	NA	NA
FBgn0010803	TrpRS	NO	0	0	6	0	6	NO	NO	NO	NO	NA	NO	4	Female	Female	Female	Neither	Neither	Neither	Female	Female	Female
FBgn0051251	CG31251	NO	0	0	2	0	2	NO	NO	NO	NO	NA	NO	1	Female	Female	Neither	Neither	Neither	Neither	Neither	Neither	Neither
FBgn0029905	Nf-YC	NO	0	0	1	0	1	NO	NO	NO	NO	NA	NO	4	Neither	Neither	Neither	NA	NA	NA	Neither	Neither	Female
FBgn0283503	Neurl4	YES	1	0	5	1	6	NO	NO	NO	NO	NA	NO	4	Female	Female	Female	Female	Female	Both	Neither	Neither	Neither
FBgn0037661	Ada	NO	0	0	3	0	3	NO	NO	NO	NO	NA	NO	3	Neither	Neither	Neither	Female	Female	Female	Neither	Neither	Neither
FBgn0039310	CG11878	NO	0	0	3	0	3	NO	NO	NO	NO	NA	NO	1	Female	Female	Female	NA	NA	NA	Neither	Neither	NA
FBgn0026479	Drp1	YES	6	0	2	6	8	NO	NO	NO	NO	NA	NO	4	Both	Both	Both	Both	Both	Both	Female	Female	Neither
FBgn0030276	Dlic	NO	0	0	1	0	1	NO	NO	NO	NO	NA	NO	4	NA	NA	NA	NA	NA	NA	NA	NA	Female
FBgn0032154	mtDNA-helicase	NO	0	0	7	0	7	NO	NO	NO	NO	NA	NO	2	Female	Female	Female	Female	Female	Female	Neither	Neither	Female
FBgn0283427	FASN1	YES	4	0	5	4	9	NO	NO	YES	NO	NA	NO	4	Both	Both	Both	Female	Female	Female	Female	Female	Both
FBgn0003149	Prm	NO	0	0	9	0	9	NO	NO	YES	NO	NA	NO	4	Female	Female	Female	Female	Female	Female	Female	Female	Female
FBgn0038606	CG15803	NO	0	0	2	0	2	NO	NO	NO	NO	NA	NO	3	NA	Neither	Neither	Neither	NA	Female	Neither	Neither	Female
FBgn0036240	CG6928	YES	3	3	0	0	3	NO	NO	NO	NO	NA	NO	3	Neither	Neither	Neither	Male	Male	Male	Neither	Neither	Neither
FBgn0020392	Nmt	NO	0	0	3	0	3	NO	NO	NO	NO	NA	NO	4	Female	Female	Female	Neither	Neither	Neither	Neither	Neither	Neither
FBgn0036279	Ncc69	YES	6	0	3	6	9	NO	NO	YES	NO	NA	NO	4	Both	Both	Both	Both	Both	Both	Female	Female	Female
FBgn0034718	wdp	NO	0	0	6	0	6	NO	NO	NO	NO	NA	NO	4	Neither	Neither	Neither	Female	Female	Female	Female	Female	Female
FBgn0015033	Cyp4d8	NO	0	0	6	0	6	NO	NO	NO	NO	NA	NO	4	Female	Female	Neither	Female	Female	Female	Female	Neither	Neither
FBgn0034709	Swim	NO	0	0	1	0	1	YES	NO	YES	NO	NA	NO	4	NA	NA	NA	Neither	Neither	Neither	Neither	Neither	Female
FBgn0050108	CG30108	NO	0	0	3	0	3	NO	NO	NO	NO	NA	NO	1	Female	Female	Female	Neither	Neither	Neither	Neither	Neither	Neither
FBgn0034362	CG5323	NO	0	0	2	0	2	NO	NO	NO	NO	NA	NO	4	Female	Female	Neither	Neither	Neither	Neither	NA	NA	Neither
FBgn0027655	htt	YES	3	2	0	1	3	NO	NO	NO	NO	NA	NO	4	Neither	Neither	Neither	Male	Both	Male	Neither	Neither	Neither
FBgn0027496	epsilonCOP	NO	0	0	4	0	4	NO	NO	NO	NO	NA	NO	4	Neither	Neither	Neither	Female	Female	Female	Neither	Neither	Female
FBgn0036118	Blos2	NO	0	0	2	0	2	NO	NO	NO	NO	NA	NO	4	Neither	Neither	Neither	Neither	Neither	Neither	Female	Female	Neither
FBgn0003206	Ras64B	NO	0	0	2	0	2	NO	NO	NO	NO	NA	NO	4	Neither	Neither	Neither	Neither	Neither	Neither	Female	Female	Neither
FBgn0262955	Polr2B	YES	6	0	3	6	9	NO	NO	NO	NO	NA	NO	4	Both	Both	Both	Both	Both	Both	Female	Female	Female
FBgn0036207	CG10907	NO	0	0	9	0	9	NO	NO	NO	NO	NA	NO	0	Female	Female	Female	Female	Female	Female	Female	Female	Female
FBgn0052267	CG32267	YES	3	0	2	3	5	NO	NO	NO	NO	NA	NO	1	NA	NA	NA	Both	Both	Both	Female	Female	Neither
FBgn0032378	CycY	YES	3	0	3	3	6	NO	NO	NO	NO	NA	NO	4	Neither	Neither	Neither	Both	Both	Both	Female	Female	Female
FBgn0036742	CG7497	NO	0	0	3	0	3	NO	NO	NO	NO	NA	NO	4	Neither	Neither	Neither	Neither	Neither	Neither	Female	Female	Female
FBgn0025720	Ate1	NO	0	0	9	0	9	NO	NO	NO	NO	NA	NO	4	Female	Female	Female	Female	Female	Female	Female	Female	Female
FBgn0039811	CG15550	NO	0	0	1	0	1	NO	NO	NO	NO	NA	NO	0	NA	Female	NA	Neither	Neither	NA	Neither	NA	NA
FBgn0261279	lqfR	YES	2	2	3	0	5	NO	NO	NO	NO	NA	NO	4	Female	Female	Neither	Male	Neither	Male	Neither	Neither	Female
FBgn0085425	CG34396	NO	0	0	2	0	2	NO	NO	NO	NO	NA	NO	4	Neither	Female	Neither	Neither	Female	Neither	Neither	Neither	NA
FBgn0033669	PI31	NO	0	0	1	0	1	NO	NO	YES	NO	NA	NO	4	NA	NA	NA	Neither	Neither	Neither	Neither	Neither	Female
FBgn0022153	l(2)k05819	NO	0	0	9	0	9	NO	NO	NO	NO	NA	NO	4	Female	Female	Female	Female	Female	Female	Female	Female	Female
FBgn0034590	Magi	NO	0	0	6	0	6	NO	NO	NO	NO	NA	NO	4	Female	Female	Neither	Female	Female	Female	Female	Neither	Neither
FBgn0035231	Pcyt2	NO	0	0	2	0	2	NO	NO	NO	NO	NA	NO	4	Neither	NA	NA	Female	Female	Neither	NA	NA	NA
FBgn0263933	ebi	NO	0	0	3	0	3	NO	NO	NO	NO	NA	NO	4	Female	Female	Female	Neither	Neither	Neither	Neither	Neither	Neither
FBgn0031434	insv	NO	0	0	5	0	5	NO	NO	NO	NO	NA	NO	1	Female	Female	NA	Female	Female	Female	Neither	NA	Neither
FBgn0260755	CG42553	NO	0	0	2	0	2	NO	NO	NO	NO	NA	NO	4	Neither	Neither	Neither	Neither	Neither	Neither	Female	Female	Neither
FBgn0030625	CG5877	NO	0	0	4	0	4	NO	NO	NO	NO	NA	NO	4	Neither	Female	Female	NA	NA	NA	Female	Female	Neither
FBgn0053554	Nipped-A	NO	0	0	1	0	1	NO	NO	NO	NO	SC	NO	4	Neither	Neither	Neither	NA	NA	NA	Neither	Neither	Female
FBgn0020388	Gcn5	YES	3	0	0	3	3	NO	NO	NO	NO	NA	NO	4	Both	Both	Both	Neither	Neither	Neither	Neither	Neither	Neither
FBgn0031885	Mnn1	NO	0	0	3	0	3	NO	NO	NO	NO	NA	NO	4	Female	Female	Female	Neither	Neither	Neither	Neither	Neither	Neither
FBgn0001404	egh	NO	0	0	1	0	1	NO	NO	NO	NO	NA	NO	4	NA	NA	NA	NA	NA	NA	Neither	Neither	Female
FBgn0052056	scramb1	NO	0	0	6	0	6	NO	NO	NO	NO	NA	NO	4	Female	Female	Female	Neither	Neither	Neither	Female	Female	Female
FBgn0051632	sens-2	NO	0	0	2	0	2	NO	NO	NO	NO	NA	NO	0	NA	NA	NA	Neither	Female	Female	NA	NA	Neither
FBgn0004390	RasGAP1	YES	2	2	5	0	7	NO	NO	NO	NO	NA	NO	4	Female	Female	Female	Neither	Male	Male	Female	Neither	Female
FBgn0023177	Pp4-19C	NO	0	0	2	0	2	NO	NO	NO	NO	NA	NO	4	NA	NA	NA	NA	NA	NA	Female	Female	NA
FBgn0032694	MESR3	NO	0	0	6	0	6	NO	NO	NO	NO	NA	NO	4	Female	Female	Female	Female	Female	Female	Neither	Neither	Neither
FBgn0000477	DNaseII	YES	3	3	1	0	4	NO	NO	NO	NO	NA	NO	4	Neither	Neither	Neither	Male	Male	Male	Neither	Neither	Female
FBgn0001320	kni	YES	1	0	0	1	1	NO	NO	NO	NO	NA	NO	1	NA	Both	NA	NA	Neither	NA	Neither	NA	NA
FBgn0034455	CG11007	YES	3	3	0	0	3	NO	NO	NO	NO	NA	NO	4	Neither	Neither	Neither	Male	Male	Male	Neither	Neither	Neither
FBgn0033728	Cpr49Ae	NO	0	0	1	0	1	NO	NO	NO	NO	NA	NO	0	Neither	Neither	Neither	Neither	Neither	Neither	Female	Neither	Neither
FBgn0036821	CG3961	NO	0	0	5	0	5	NO	NO	NO	NO	NA	NO	2	Neither	Female	Female	Female	Female	Female	Neither	Neither	Neither
FBgn0034394	CG15096	YES	3	0	1	3	4	NO	NO	NO	NO	NA	NO	4	Both	Both	Both	Neither	Neither	Neither	Neither	Neither	Female
FBgn0028841	jhamt	YES	5	3	4	2	9	NO	NO	NO	NO	NA	NO	4	Male	Male	Male	Both	Female	Both	Female	Female	Female
FBgn0034735	CG4610	YES	3	0	0	3	3	NO	NO	NO	NO	NA	NO	4	Neither	Neither	Neither	Both	Both	Both	NA	NA	Neither
FBgn0260935	Vps15	YES	3	1	0	2	3	NO	NO	NO	NO	NA	NO	4	Neither	Neither	Neither	Both	Male	Both	Neither	Neither	Neither
FBgn0029121	Sras	NO	0	0	2	0	2	NO	NO	NO	NO	NA	NO	4	Neither	Neither	Neither	Neither	Neither	Neither	Female	Female	NA
FBgn0000008	a	YES	1	0	7	1	8	NO	NO	NO	NO	NA	NO	4	Female	Female	Female	Female	Female	Both	Neither	Female	Female
FBgn0027079	ValRS	YES	3	0	1	3	4	NO	NO	NO	NO	NA	NO	4	Both	Both	Both	Neither	Neither	Neither	Neither	Neither	Female
FBgn0011660	Pms2	NO	0	0	3	0	3	NO	NO	NO	NO	NA	NO	2	Neither	Neither	Neither	Female	Female	Female	Neither	Neither	Neither
FBgn0085412	kmr	NO	0	0	5	0	5	NO	NO	NO	NO	NA	NO	4	Neither	Female	Neither	Female	Female	Neither	Female	Neither	Female
FBgn0283469	Vps4	NO	0	0	1	0	1	NO	NO	NO	NO	NA	NO	4	Neither	Neither	Neither	Neither	Neither	Neither	Neither	Neither	Female
FBgn0262517	Ltn1	NO	0	0	3	0	3	NO	NO	NO	NO	NA	NO	4	Female	Female	Female	Neither	Neither	Neither	Neither	Neither	Neither
FBgn0033446	CG1648	YES	3	3	3	0	6	NO	NO	YES	NO	NA	NO	4	Male	Male	Male	Neither	Neither	Neither	Female	Female	Female
FBgn0011291	Taf11	NO	0	0	6	0	6	NO	NO	NO	NO	NA	NO	3	Female	Female	Female	Female	Female	Female	NA	NA	NA
FBgn0036624	RAF2	NO	0	0	3	0	3	NO	NO	NO	NO	NA	NO	4	Female	Female	Female	Neither	Neither	Neither	Neither	Neither	Neither
FBgn0035865	CG7201	NO	0	0	2	0	2	NO	NO	NO	NO	NA	NO	0	Neither	Female	Neither	Neither	Neither	Neither	Female	NA	Neither
FBgn0039487	gb	NO	0	0	8	0	8	NO	NO	NO	NO	NA	NO	3	Female	Female	Female	Female	Female	Female	Female	Female	Neither
FBgn0033236	CG14764	YES	3	0	0	3	3	NO	NO	NO	NO	NA	NO	4	Neither	Neither	Neither	Both	Both	Both	Neither	Neither	Neither
FBgn0050296	RIC-3	NO	0	0	3	0	3	NO	NO	NO	NO	NA	NO	4	Female	Female	Female	NA	NA	NA	Neither	Neither	Neither
FBgn0037561	CG9630	NO	0	0	2	0	2	NO	NO	NO	NO	NA	NO	3	Neither	Neither	Neither	NA	NA	NA	Female	Female	Neither
FBgn0036842	Ugt316A1	YES	2	0	3	2	5	NO	NO	NO	NO	NA	NO	4	Both	Both	Female	Neither	Neither	Neither	Female	Female	Neither
FBgn0030872	Ucp4A	YES	3	3	1	0	4	NO	NO	NO	NO	NA	NO	3	Neither	Neither	Neither	Male	Male	Male	Female	Neither	Neither
FBgn0003062	Fib	YES	1	1	0	0	1	NO	NO	YES	NO	NA	NO	3	Neither	Neither	Neither	Neither	Male	Neither	Neither	Neither	NA
FBgn0287774	CG9143	YES	3	3	3	0	6	NO	NO	NO	NO	NA	NO	4	NA	NA	NA	Male	Male	Male	Female	Female	Female
FBgn0038330	CG14868	YES	3	0	0	3	3	NO	NO	NO	NO	NA	NO	2	Both	Both	Both	Neither	Neither	Neither	Neither	Neither	NA
FBgn0032480	Edem2	YES	3	3	0	0	3	NO	NO	NO	NO	NA	NO	4	Neither	Neither	Neither	Male	Male	Male	Neither	Neither	Neither
FBgn0013563	Pex1	YES	3	0	3	3	6	NO	NO	NO	NO	NA	NO	4	Female	Female	Female	Both	Both	Both	Neither	Neither	Neither
FBgn0031016	kek5	NO	0	0	1	0	1	NO	NO	NO	NO	NA	NO	4	Neither	Neither	Neither	NA	NA	NA	Neither	Neither	Female
FBgn0034484	CG11044	NO	0	0	4	0	4	NO	NO	NO	NO	NA	NO	2	Female	Female	Female	Neither	Neither	NA	Female	NA	NA
FBgn0030512	Nadsyn	NO	0	0	1	0	1	NO	NO	NO	NO	NA	NO	4	NA	NA	NA	Neither	Neither	Neither	NA	NA	Female
FBgn0040260	Ugt37D1	NO	0	0	8	0	8	NO	NO	NO	NO	NA	NO	4	Female	Female	Female	Female	Female	Female	Female	Female	Neither
FBgn0037687	CG8132	NO	0	0	4	0	4	NO	NO	NO	NO	NA	NO	4	Neither	Neither	Neither	Female	Female	Female	Neither	Neither	Female
FBgn0261850	Xpd	YES	3	0	5	3	8	NO	NO	NO	NO	NA	NO	4	Female	Female	Female	Both	Both	Both	Female	Female	Neither
FBgn0051869	CG31869	NO	0	0	6	0	6	NO	NO	NO	NO	NA	NO	4	NA	Female	Female	Neither	Female	Female	Female	Female	Neither
FBgn0263289	scrib	YES	3	0	6	3	9	NO	NO	NO	NO	NA	NO	4	Both	Both	Both	Female	Female	Female	Female	Female	Female
FBgn0031836	CG11050	NO	0	0	3	0	3	NO	NO	NO	NO	NA	NO	4	Neither	Neither	Neither	Female	Female	Female	Neither	Neither	Neither
FBgn0001202	hook	NO	0	0	3	0	3	NO	NO	NO	NO	NA	NO	4	Neither	Neither	Neither	Female	Female	Female	Neither	Neither	Neither
FBgn0000317	ck	NO	0	0	2	0	2	NO	NO	YES	NO	NA	NO	4	Neither	Neither	Neither	Neither	Neither	Neither	Female	Female	Neither
FBgn0015790	Rab11	NO	0	0	2	0	2	NO	NO	YES	NO	NA	NO	4	NA	NA	NA	Neither	Neither	Neither	Female	Female	Neither
FBgn0267488	Mcr	YES	4	0	5	4	9	NO	NO	YES	NO	NA	NO	4	Both	Female	Female	Both	Both	Both	Female	Female	Female
FBgn0034439	CG10062	YES	1	0	1	1	2	NO	NO	NO	NO	NA	NO	2	NA	Neither	Neither	Neither	Female	Both	Neither	NA	Neither
FBgn0046999	CG6429	NO	0	0	1	0	1	NO	NO	NO	NO	NA	NO	0	NA	NA	NA	NA	NA	NA	Neither	Female	Neither
FBgn0260959	MCPH1	NO	0	0	1	0	1	NO	NO	NO	NO	NA	NO	4	Neither	Neither	Neither	Neither	Neither	Neither	Neither	Neither	Female
FBgn0034276	Sardh	NO	0	0	6	0	6	NO	NO	NO	NO	NA	NO	0	Neither	NA	Neither	Female	Female	Female	Female	Female	Female
FBgn0036180	Duba	NO	0	0	2	0	2	NO	NO	NO	NO	NA	NO	4	Neither	Neither	Neither	Neither	Neither	Neither	Female	Female	Neither
FBgn0035375	Pgant6	YES	3	0	0	3	3	NO	NO	NO	NO	NA	NO	4	Neither	Neither	Neither	Both	Both	Both	Neither	Neither	NA
FBgn0035708	axed	NO	0	0	1	0	1	NO	NO	NO	NO	EDC	NO	2	NA	Neither	NA	Neither	Neither	Neither	Female	NA	NA
FBgn0035333	CG1317	YES	3	0	3	3	6	NO	NO	NO	NO	NA	NO	4	Neither	Neither	Neither	Both	Both	Both	Female	Female	Female
FBgn0034270	PIG-A	NO	0	0	2	0	2	NO	NO	NO	NO	NA	NO	2	Neither	Neither	Neither	Neither	Female	Female	Neither	Neither	Neither
FBgn0026402	NiPp1	NO	0	0	3	0	3	NO	NO	NO	NO	NA	NO	4	Female	Female	Female	Neither	Neither	Neither	Neither	Neither	Neither
FBgn0002022	Catsup	NO	0	0	7	0	7	NO	NO	NO	NO	NA	NO	4	Female	Female	Female	Female	Female	Female	Neither	Neither	Female
FBgn0033453	Sting	NO	0	0	7	0	7	NO	NO	NO	NO	NA	NO	4	Female	Female	Female	Female	Female	Female	NA	NA	Female
FBgn0036257	RhoGAP68F	NO	0	0	6	0	6	NO	NO	NO	NO	NA	NO	4	Neither	Neither	Neither	Female	Female	Female	Female	Female	Female
FBgn0052262	CG32262	YES	3	0	1	3	4	NO	NO	NO	NO	NA	NO	4	Both	Both	Both	Neither	Neither	Neither	Neither	Neither	Female
FBgn0040271	Sulf1	YES	2	0	6	2	8	NO	NO	NO	NO	NA	NO	4	Both	Both	Female	Female	Female	Female	Female	Female	Neither
FBgn0032435	Oatp33Eb	YES	1	0	4	1	5	NO	NO	NO	NO	NA	NO	0	NA	NA	Female	Neither	Female	Both	NA	Female	Female
FBgn0036834	CG6836	NO	0	0	1	0	1	NO	NO	NO	NO	NA	NO	4	Neither	Neither	NA	Neither	Neither	Neither	Female	Neither	Neither
FBgn0033538	CG11883	NO	0	0	5	0	5	NO	NO	NO	NO	NA	NO	4	Female	Female	Female	NA	NA	NA	Female	Female	Neither
FBgn0041194	Prat2	NO	0	0	3	0	3	NO	NO	NO	NO	NA	NO	4	Neither	Neither	Neither	Neither	Neither	Neither	Female	Female	Female
FBgn0061492	loj	YES	3	3	0	0	3	NO	YES	NO	NO	NA	NO	4	Neither	Neither	Neither	Male	Male	Male	Neither	Neither	Neither
FBgn0035644	PolE2	NO	0	0	1	0	1	NO	NO	NO	NO	NA	NO	1	NA	NA	NA	Female	Neither	Neither	NA	NA	NA
FBgn0046113	GluRIIC	YES	3	0	2	3	5	NO	NO	NO	NO	NA	NO	4	Both	Both	NA	Female	Both	Female	Neither	NA	Neither
FBgn0016983	smid	NO	0	0	9	0	9	NO	NO	NO	NO	NA	NO	4	Female	Female	Female	Female	Female	Female	Female	Female	Female
FBgn0051719	RluA-1	NO	0	0	1	0	1	NO	NO	NO	NO	NA	NO	0	NA	Female	NA	Neither	Neither	Neither	Neither	NA	NA
FBgn0037021	Pcif1	NO	0	0	4	0	4	NO	NO	NO	NO	NA	NO	4	Female	Female	Female	Neither	Female	Neither	Neither	Neither	Neither
FBgn0039209	REPTOR	NO	0	0	3	0	3	NO	NO	NO	NO	NA	NO	4	Neither	Neither	Neither	NA	NA	NA	Female	Female	Female
FBgn0039140	Miro	NO	0	0	2	0	2	NO	NO	NO	NO	NA	NO	4	Neither	Neither	Neither	Neither	Neither	Neither	Female	Female	Neither
FBgn0033187	PIG-G	YES	3	0	6	3	9	NO	NO	NO	NO	NA	NO	4	Female	Female	Female	Both	Both	Both	Female	Female	Female
FBgn0037814	CG6325	YES	1	1	3	0	4	NO	NO	NO	NO	NA	NO	4	Male	Neither	Neither	Female	Female	Female	Neither	Neither	Neither
FBgn0003308	ry	YES	1	0	2	1	3	NO	NO	NO	NO	NA	NO	4	Neither	Neither	Neither	Both	Neither	Female	Female	Neither	Neither
FBgn0024273	WASp	YES	5	0	3	5	8	NO	NO	NO	NO	NA	NO	4	Both	Both	Female	Both	Both	Both	Female	Female	Neither
FBgn0038499	Brf	NO	0	0	1	0	1	NO	NO	NO	NO	NA	NO	4	Neither	Neither	Neither	Neither	Neither	Neither	NA	NA	Female
FBgn0038826	Syp	YES	2	0	1	2	3	NO	NO	YES	NO	NA	NO	4	Neither	Neither	Neither	Female	Both	Both	Neither	Neither	Neither
FBgn0263025	HSPBAP1	NO	0	0	4	0	4	NO	NO	NO	NO	NA	NO	2	NA	NA	NA	Female	Female	Female	Neither	Neither	Female
FBgn0262473	Tl	NO	0	0	9	0	9	NO	NO	NO	NO	NA	NO	4	Female	Female	Female	Female	Female	Female	Female	Female	Female
FBgn0041585	Orai	YES	5	0	4	5	9	NO	NO	NO	NO	NA	NO	4	Both	Both	Both	Female	Both	Both	Female	Female	Female
FBgn0025336	CG4882	YES	3	0	0	3	3	NO	NO	NO	NO	NA	NO	4	NA	NA	NA	Both	Both	Both	Neither	Neither	Neither
FBgn0020510	Abi	NO	0	0	3	0	3	NO	NO	NO	NO	NA	NO	4	Female	Female	Female	Neither	Neither	Neither	Neither	Neither	Neither
[truncated: 505 more rows]

## Sheet: Table S5
Table S5: Male-Derived Transcripts
				Presence of Gene in Other Gene Lists					Expression in RAL 517 from Cridland et al. 2020			Male Derived Transcript Detected in Organ
Gene ID	Gene Name	Number of Libraries With Expressed Male-Derived Transcripts	Transcripts Expressed in All Three Organs of RAL 304 and RAL 307	Wigby et al. 2020	Immarigeon et al. 2021	McCullough et al. 2020	Majane et al. 2022	Expressed in Wigby et al. 2020, Immarigeon et al. 2021 or Majane et al. 2022 and either RAL 304 or RAL 307	Accessory Gland (TPM)	Testis (TPM)	Number of Transcriptomes with Expression in Ost et al. 2014	RAL 304 Parovaria	RAL 304 Seminal Receptacle	RAL 304 Spermathecae	RAL 307 Parovaria	RAL 307 Seminal Receptacle	RAL 307 Spermathecae	RAL 360 Seminal Receptacle	RAL 360 Spermathecae	RAL 399 Spermathecae	Pariovaria Expression in RAL 304 or RAL 307, Ost et al. 2014 = 4, RAL 517 TPM < 1
FBgn0034432	CG7461	8	YES	NO	NO	YES	NA	NO	23.7283	8.93037	4	YES	YES	YES	YES	YES	YES	YES	YES	NO	NO
FBgn0039737	CG7920	8	YES	NO	NO	YES	NA	NO	137.556	247.545	4	YES	YES	YES	YES	YES	YES	YES	YES	NO	NO
FBgn0050394	CG30394	6	YES	NO	NO	NO	NA	NO	6.41354	6.3897	4	YES	YES	YES	YES	YES	YES	NO	NO	NO	NO
FBgn0028371	jbug	6	YES	NO	NO	YES	NA	NO	23.5219	2.10603	4	YES	YES	YES	YES	YES	YES	NO	NO	NO	NO
FBgn0031589	Naprt	6	YES	NO	NO	NO	NA	NO	8.52004	1.56654	4	YES	YES	YES	YES	YES	YES	NO	NO	NO	NO
FBgn0025808	Rad17	6	YES	NO	NO	NO	NA	NO	2.11976	6.95024	2	YES	YES	YES	YES	YES	YES	NO	NO	NO	NO
FBgn0036299	Tsf2	6	YES	NO	NO	NO	NA	NO	14.716	13.263	4	YES	YES	YES	YES	YES	YES	NO	NO	NO	NO
FBgn0261477	slim	6	YES	NO	NO	NO	NA	NO	16.0709	95.6968	4	YES	YES	YES	YES	YES	YES	NO	NO	NO	NO
FBgn0031379	CG7289	6	YES	NO	NO	NO	NA	NO	32.3248	54.1291	4	YES	YES	YES	YES	YES	YES	NO	NO	NO	NO
FBgn0035145	MED14	6	YES	NO	NO	NO	NA	NO	5.0594	3.711	4	YES	YES	YES	YES	YES	YES	NO	NO	NO	NO
FBgn0026479	Drp1	6	YES	NO	NO	NO	NA	NO	24.4077	93.9541	4	YES	YES	YES	YES	YES	YES	NO	NO	NO	NO
FBgn0025725	alphaCOP	6	YES	NO	NO	YES	NA	NO	97.142	11.9247	4	YES	YES	YES	YES	YES	YES	NO	NO	NO	NO
FBgn0264357	SNF4Agamma	6	YES	NO	NO	NO	NA	NO	28.5719	12.5463	4	YES	YES	YES	YES	YES	YES	NO	NO	NO	NO
FBgn0033889	CG6701	6	YES	NO	NO	NO	NA	NO	23.6924	44.2601	4	YES	YES	YES	YES	YES	YES	NO	NO	NO	NO
FBgn0034177	AsnRS-m	6	YES	NO	NO	NO	NA	NO	1.06123	0.989444	2	YES	YES	YES	YES	YES	YES	NO	NO	NO	NO
FBgn0051116	ClC-a	6	YES	NO	NO	NO	MC	YES	32.5721	1.7915	4	YES	YES	YES	YES	YES	YES	NO	NO	NO	NO
FBgn0036887	CG9231	6	YES	NO	NO	NO	NA	NO	20.316	84.7915	4	YES	YES	YES	YES	YES	YES	NO	NO	NO	NO
FBgn0040752	Prosap	6	YES	NO	NO	YES	MC	YES	24.024	3.11625	4	YES	YES	YES	YES	YES	YES	NO	NO	NO	NO
FBgn0027780	Aasdh	6	YES	NO	NO	NO	NA	NO	2.30602	0.709839	4	YES	YES	YES	YES	YES	YES	NO	NO	NO	NO
FBgn0262955	Polr2B	6	YES	NO	NO	NO	NA	NO	9.3076	4.57601	4	YES	YES	YES	YES	YES	YES	NO	NO	NO	NO
FBgn0263697	Uba3	6	YES	NO	NO	NO	NA	NO	4.68495	13.7865	4	YES	YES	YES	YES	YES	YES	NO	NO	NA	NO
FBgn0031996	CG8460	6	YES	NO	YES	NO	NA	YES	46.6413	17.1796	4	YES	YES	YES	YES	YES	YES	NO	NO	NO	NO
FBgn0013997	Nrx-IV	6	YES	NO	NO	YES	NA	NO	13.5159	14.9977	4	YES	YES	YES	YES	YES	YES	NO	NO	NO	NO
FBgn0259221	ATP8A	6	YES	NO	NO	NO	NA	NO	41.6165	33.5926	4	YES	YES	YES	YES	YES	YES	NO	NO	NO	NO
FBgn0036773	CG13698	6	YES	NO	NO	NO	NA	NO	8.48753	8.04061	4	YES	YES	YES	YES	YES	YES	NO	NO	NO	NO
FBgn0034075	Asph	6	YES	NO	NO	NO	NA	NO	4.2343	5.89582	4	YES	YES	YES	YES	YES	YES	NO	NO	NO	NO
FBgn0032006	Pvr	6	YES	NO	NO	NO	NA	NO	11.0094	7.89517	4	YES	YES	YES	YES	YES	YES	NO	NO	NO	NO
FBgn0036133	emei	6	YES	NO	NO	NO	NA	NO	4.48356	17.6341	4	YES	YES	YES	YES	YES	YES	NO	NO	NO	NO
FBgn0086906	sls	6	YES	NO	NO	NO	NA	NO	5.52521	5.14592	4	YES	YES	YES	YES	YES	YES	NO	NO	NO	NO
FBgn0034271	Vps50	6	YES	NO	NO	NO	NA	NO	2.88582	4.58721	4	YES	YES	YES	YES	YES	YES	NA	NA	NA	NO
FBgn0027091	CysRS	6	YES	NO	NO	NO	NA	NO	6.43885	7.84936	4	YES	YES	YES	YES	YES	YES	NO	NO	NO	NO
FBgn0035165	CG13887	6	YES	NO	YES	YES	NA	YES	82.7507	93.3757	4	YES	YES	YES	YES	YES	YES	NO	NO	NO	NO
FBgn0036288	CG10660	6	YES	NO	NO	NO	NA	NO	7.42528	64.1427	4	YES	YES	YES	YES	YES	YES	NO	NO	NO	NO
FBgn0034442	CG11257	6	YES	NO	NO	NO	NA	NO	2.03634	2.90425	2	YES	YES	YES	YES	YES	YES	NO	NO	NO	NO
FBgn0036106	CG6409	6	YES	NO	NO	NO	NA	NO	28.5373	79.4798	4	YES	YES	YES	YES	YES	YES	NO	NO	NO	NO
FBgn0263602	Tasp1	6	YES	NO	NO	NO	NA	NO	5.39627	8.56576	4	YES	YES	YES	YES	YES	YES	NO	NO	NO	NO
FBgn0020440	Fak	6	YES	NO	NO	NO	NA	NO	2.52251	4.42864	4	YES	YES	YES	YES	YES	YES	NO	NO	NO	NO
FBgn0036662	CG9706	6	YES	NO	NO	NO	NA	NO	63.2665	40.0848	4	YES	YES	YES	YES	YES	YES	NO	NO	NO	NO
FBgn0035763	mrva	6	YES	NO	YES	NO	NA	YES	32.8301	28.3545	4	YES	YES	YES	YES	YES	YES	NO	NO	NO	NO
FBgn0036279	Ncc69	6	YES	NO	NO	YES	NA	NO	22.6632	7.13551	4	YES	YES	YES	YES	YES	YES	NO	NO	NO	NO
FBgn0264894	CG44085	6	YES	NO	NO	NO	NA	NO	10.8917	16.147	4	YES	YES	YES	YES	YES	YES	NO	NO	NO	NO
FBgn0034380	Vps51	6	YES	NO	NO	NO	NA	NO	6.22283	7.98302	4	YES	YES	YES	YES	YES	YES	NO	NO	NO	NO
FBgn0013733	shot	6	YES	NO	NO	YES	NA	NO	12.4072	4.32648	4	YES	YES	YES	YES	YES	YES	NO	NO	NO	NO
FBgn0086757	cbs	6	YES	NO	NO	NO	NA	NO	8.93873	25.6659	4	YES	YES	YES	YES	YES	YES	NO	NO	NO	NO
FBgn0031990	PAPLA1	6	YES	NO	NO	NO	NA	NO	16.496	25.7419	4	YES	YES	YES	YES	YES	YES	NO	NO	NO	NO
FBgn0011230	poe	6	YES	NO	NO	YES	NA	NO	14.091	13.2468	4	YES	YES	YES	YES	YES	YES	NO	NO	NO	NO
FBgn0035766	eco	6	YES	NO	NO	NO	NA	NO	8.39423	5.20637	4	YES	YES	YES	YES	YES	YES	NO	NO	NO	NO
FBgn0025519	fidipidine	6	YES	NO	NO	NO	NA	NO	9.91124	7.95268	4	YES	YES	YES	YES	YES	YES	NO	NO	NO	NO
FBgn0262160	CG9932	6	NO	NO	NO	NO	NA	NO	39.6008	5.39435	4	YES	YES	NO	YES	YES	YES	YES	NO	NO	NO
FBgn0020251	sfl	6	YES	NO	NO	NO	NA	NO	1.52187	2.10252	4	YES	YES	YES	YES	YES	YES	NO	NO	NO	NO
FBgn0034083	lbk	6	YES	NO	NO	NO	NA	NO	9.32066	5.87131	4	YES	YES	YES	YES	YES	YES	NO	NO	NO	NO
FBgn0034308	Naus	6	YES	NO	NO	NO	NA	NO	6.56411	3.63639	4	YES	YES	YES	YES	YES	YES	NO	NO	NO	NO
FBgn0017581	Lk6	6	YES	NO	NO	NO	NA	NO	186.035	64.4793	4	YES	YES	YES	YES	YES	YES	NA	NA	NO	NO
FBgn0031529	CG9662	6	YES	NO	NO	NO	NA	NO	25.6514	72.9996	4	YES	YES	YES	YES	YES	YES	NO	NO	NO	NO
FBgn0023172	RhoGEF2	6	YES	NO	NO	NO	NA	NO	9.84021	3.07387	4	YES	YES	YES	YES	YES	YES	NO	NO	NO	NO
FBgn0038181	CG9297	6	YES	NO	NO	NO	NA	NO	5.30072	0.903442	4	YES	YES	YES	YES	YES	YES	NO	NO	NO	NO
FBgn0034072	Dg	6	YES	NO	NO	NO	NA	NO	7.79585	28.6552	4	YES	YES	YES	YES	YES	YES	NO	NO	NO	NO
FBgn0038948	JMJD6	6	YES	NO	NO	NO	NA	NO	8.28097	14.556	4	YES	YES	YES	YES	YES	YES	NO	NO	NO	NO
FBgn0014396	tim	6	YES	NO	NO	NO	NA	NO	9.26328	2.42827	4	YES	YES	YES	YES	YES	YES	NO	NO	NO	NO
FBgn0034631	TAF1C-like	6	YES	NO	NO	NO	NA	NO	3.84892	10.2311	3	YES	YES	YES	YES	YES	YES	NO	NO	NO	NO
FBgn0263776	CG43693	6	YES	NO	NO	NO	NA	NO	49.1753	8.68589	4	YES	YES	YES	YES	YES	YES	NO	NO	NO	NO
FBgn0261553	CG42671	6	YES	NO	NO	YES	NA	NO	7.531	10.6265	4	YES	YES	YES	YES	YES	YES	NO	NO	NO	NO
FBgn0027535	botv	6	YES	NO	NO	NO	NA	NO	1.2596	1.23734	4	YES	YES	YES	YES	YES	YES	NO	NO	NO	NO
FBgn0034354	GstE11	6	YES	NO	NO	NO	NA	NO	7.96638	2.61213	4	YES	YES	YES	YES	YES	YES	NA	NA	NO	NO
FBgn0259682	Jabba	6	YES	NO	NO	NO	NA	NO	2.908	19.4832	4	YES	YES	YES	YES	YES	YES	NO	NO	NO	NO
FBgn0041585	Orai	5	NO	NO	NO	NO	NA	NO	5.96343	20.0094	4	YES	YES	YES	NO	YES	YES	NO	NO	NO	NO
FBgn0031305	Iris	5	NO	NO	NO	NO	NA	NO	0.832248	0.108783	3	YES	YES	YES	YES	NO	YES	NO	NO	NO	NO
FBgn0028841	jhamt	5	NO	NO	NO	NO	NA	NO	41.0698	0	4	YES	YES	YES	YES	NO	YES	NO	NO	NO	NO
FBgn0041181	Tep3	5	NO	NO	NO	NO	NA	NO	5.65399	1.59005	2	YES	YES	YES	NO	YES	YES	NO	NO	NA	NO
FBgn0034087	clu	5	NO	NO	NO	YES	NA	NO	3.78402	17.5025	4	YES	YES	NO	YES	YES	YES	NO	NO	NO	NO
FBgn0035704	Vps8	5	NO	NO	NO	NO	NA	NO	1.97599	11.6489	4	YES	YES	NO	YES	YES	YES	NO	NO	NO	NO
FBgn0034999	Fatp3	5	NO	NO	NO	YES	NA	NO	4.28285	51.6193	4	YES	YES	NO	YES	YES	YES	NO	NO	NO	NO
FBgn0050069	CG30069	5	NO	NO	NO	YES	NA	NO	6.24066	2.19015	4	YES	YES	NO	YES	YES	YES	NO	NO	NO	NO
FBgn0024273	WASp	5	NO	NO	NO	NO	NA	NO	6.88488	42.7551	4	YES	YES	NO	YES	YES	YES	NO	NO	NO	NO
FBgn0020503	CLIP-190	5	NO	NO	NO	NO	NA	NO	134.428	89.9381	4	YES	YES	NO	YES	YES	YES	NO	NO	NO	NO
FBgn0027585	CG8740	5	NO	NO	NO	YES	NA	NO	20.5415	5.07539	4	YES	NO	YES	YES	YES	YES	NO	NO	NO	NO
FBgn0035400	CG11537	5	NO	NO	NO	NO	NA	NO	24.5881	70.0397	4	YES	YES	YES	NO	YES	YES	NO	NO	NO	NO
FBgn0034733	CG4752	5	NO	NO	NO	NO	NA	NO	4.19818	10.4161	4	YES	NO	YES	YES	YES	YES	NO	NO	NO	NO
FBgn0000119	arr	5	NO	NO	NO	NO	NA	NO	3.0507	1.93612	4	NO	YES	YES	YES	YES	YES	NO	NO	NO	NO
FBgn0034641	mahj	5	NO	NO	NO	NO	NA	NO	5.79654	2.43949	4	NO	YES	YES	YES	YES	YES	NO	NO	NO	NO
FBgn0036141	wls	5	NO	NO	NO	NO	NA	NO	3.52579	8.44593	4	YES	YES	NO	YES	YES	YES	NO	NO	NO	NO
FBgn0033710	CG17739	5	NO	NO	NO	NO	NA	NO	0.705101	2.89843	4	YES	YES	NO	YES	YES	YES	NO	NO	NO	YES
FBgn0052479	Usp10	5	NO	NO	NO	NO	NA	NO	7.06246	25.1956	4	YES	YES	YES	NO	YES	YES	NO	NO	NO	NO
FBgn0032603	CG17928	5	NO	NO	NO	NO	NA	NO	13.2347	2.71387	4	YES	YES	NO	YES	YES	YES	NO	NO	NO	NO
FBgn0263077	M7BP	4	NO	NO	NO	NO	NA	NO	15.3506	6.30786	4	YES	YES	NO	NO	YES	YES	NO	NO	NO	NO
FBgn0283427	FASN1	4	NO	NO	NO	YES	NA	NO	4.84774	8.92863	4	YES	YES	YES	NO	NO	NO	NO	NO	YES	NO
FBgn0034114	CG4282	4	NO	NO	NO	NO	NA	NO	2.0447	2.39787	3	NO	YES	NO	YES	YES	YES	NO	NO	NA	NO
FBgn0262476	CG43066	4	NO	NO	NO	NO	NA	NO	0.921421	3.33527	4	NA	YES	NO	YES	YES	YES	NO	NA	NO	YES
FBgn0036688	Fit2	4	NO	NO	NO	NO	NA	NO	0.954072	1.42864	4	NO	YES	NO	YES	YES	YES	NO	NO	NA	YES
FBgn0261565	Lmpt	4	NO	NO	NO	NO	NA	NO	27.1055	18.3993	4	NO	YES	NO	YES	YES	YES	NO	NO	NO	NO
FBgn0028490	CG31705	4	NO	NO	NO	NO	NA	NO	23.7949	38.652	4	YES	YES	YES	YES	NO	NO	NO	NO	NO	NO
FBgn0261387	CG17528	4	NO	NO	NO	NO	NA	NO	3.53681	19.5789	4	YES	YES	NO	NO	YES	YES	NO	NO	NA	NO
FBgn0039727	Vps13B	4	NO	NO	NO	YES	NA	NO	7.66354	25.9354	4	YES	NO	YES	YES	NO	YES	NO	NO	NO	NO
FBgn0033387	CG8008	4	NO	NO	NO	NO	NA	NO	3.29107	20.2675	4	NO	YES	NO	YES	YES	YES	NO	NO	NO	NO
FBgn0024558	Dph5	4	NO	NO	NO	NO	NA	NO	18.246	21.6234	4	YES	YES	NO	YES	YES	NO	NO	NO	NO	NO
FBgn0038243	CG8066	4	NO	NO	NO	NO	NA	NO	10.5334	3.99469	4	YES	YES	NO	NO	YES	YES	NO	NO	NO	NO
FBgn0041630	Hexo1	4	NO	NO	NO	NO	NA	NO	6.17792	4.30848	4	YES	NO	NO	YES	YES	YES	NA	NA	NO	NO
FBgn0036157	CG7560	4	NO	NO	NO	NO	NA	NO	0.365913	1.30267	3	YES	NO	NO	YES	YES	YES	NO	NO	NO	NO
FBgn0016715	Reg-2	4	NO	NO	NO	NO	NA	NO	29.2592	16.8335	3	YES	YES	NO	YES	NO	YES	NO	NO	NO	NO
FBgn0026376	Rgl	4	NO	NO	NO	NO	NA	NO	11.1844	2.6114	4	NO	YES	YES	NO	YES	YES	NO	NO	NO	NO
FBgn0011274	Dif	4	NO	NO	NO	NO	NA	NO	20.9371	3.02954	4	NO	YES	NO	YES	YES	YES	NO	NO	NO	NO
FBgn0000395	cv-2	4	NO	NO	NO	NO	NA	NO	0.624363	1.97036	4	NO	YES	NO	YES	YES	YES	NO	NO	NO	YES
FBgn0263316	Mrp4	4	NO	NO	NO	NO	NA	NO	11.4885	0.880888	4	NO	YES	NO	YES	YES	YES	NO	NO	NO	NO
FBgn0267488	Mcr	4	NO	NO	NO	YES	NA	NO	9.89256	11.8581	4	YES	NO	NO	YES	YES	YES	NO	NO	NO	NO
FBgn0036187	RIOK1	4	NO	NO	NO	YES	NA	NO	3.68695	1.66572	3	NO	YES	NO	YES	YES	YES	NO	NO	NO	NO
FBgn0019938	Polr1A	4	NO	NO	NO	YES	NA	NO	5.13335	2.54894	4	NO	YES	NO	YES	YES	YES	NO	NO	NO	NO
FBgn0051793	CG31793	4	NO	NO	NO	NO	NA	NO	0.35395	2.58618	4	YES	NO	NO	YES	YES	YES	NA	NA	NO	YES
FBgn0037934	CG6830	4	NO	NO	NO	NO	NA	NO	4.3078	0.546962	4	YES	NO	YES	YES	NO	YES	NO	NO	NO	NO
FBgn0263599	Brr2	3	NO	NO	NO	NO	NA	NO	8.17834	3.71446	4	NO	NO	NO	YES	YES	YES	NO	NO	NO	NO
FBgn0031260	Spp	3	NO	NO	NO	NO	NA	NO	407.249	38.6363	4	NO	NO	NO	YES	YES	YES	NO	NO	NO	NO
FBgn0001308	Khc	3	NO	NO	NO	NO	NA	NO	24.4757	13.1329	4	YES	YES	YES	NO	NO	NO	NO	NO	NO	NO
FBgn0265487	mbl	3	NO	NO	NO	NO	SC	YES	9.68613	8.58846	4	NO	YES	YES	NO	YES	NO	NO	NO	NO	NO
FBgn0034184	CG9646	3	NO	NO	NO	NO	NA	NO	6.10189	16.4734	4	YES	YES	YES	NO	NO	NO	NO	NO	NO	NO
FBgn0010808	Chchd3	3	NO	NO	NO	NO	NA	NO	36.159	18.8269	4	NA	NA	NA	YES	YES	YES	NO	NO	NO	NO
FBgn0034693	flap	3	NO	NO	NO	NO	NA	NO	0.309766	0.118076	0	NO	YES	NO	NO	YES	YES	NO	NO	NO	NO
FBgn0034879	Rrp4	3	NO	NO	NO	NO	NA	NO	14.0311	12.8882	3	NA	NA	NA	YES	YES	YES	NO	NO	NO	NO
FBgn0033187	PIG-G	3	NO	NO	NO	NO	NA	NO	11.6155	10.1304	4	NO	NO	NO	YES	YES	YES	NO	NO	NO	NO
FBgn0260407	mRpS23	3	NO	NO	NO	NO	NA	NO	7.8353	21.8333	4	NA	NA	NA	YES	YES	YES	NA	NA	NO	NO
FBgn0035541	CG15019	3	NO	NO	NO	NO	NA	NO	46.1006	26.2467	4	YES	YES	YES	NA	NA	NA	NA	NA	NO	NO
FBgn0014869	Pglym78	3	NO	NO	NO	YES	NA	NO	74.9509	32.7971	4	YES	YES	YES	NO	NO	NO	NO	NO	NO	NO
FBgn0030869	Socs16D	3	NO	NO	NO	NO	NA	NO	7.99943	4.78914	4	NA	NO	NA	YES	YES	YES	NO	NO	NO	NO
FBgn0037622	CG8202	3	NO	NO	NO	NO	NA	NO	2.53333	3.04153	4	NA	NA	NA	YES	YES	YES	NO	NO	NO	NO
FBgn0283521	lola	3	NO	NO	NO	NO	NA	NO	58.7833	43.4186	4	YES	YES	YES	NA	NA	NA	NO	NO	NO	NO
FBgn0283500	Sac1	3	NO	NO	NO	NO	NA	NO	26.4187	93.9843	4	NO	NO	NO	YES	YES	YES	NO	NO	NO	NO
FBgn0033413	prel	3	NO	NO	NO	NO	NA	NO	21.6135	62.8379	4	NO	NO	NO	YES	YES	YES	NO	NO	NO	NO
FBgn0260936	scny	3	NO	NO	NO	NO	NA	NO	11.1881	50.3391	4	YES	YES	YES	NO	NO	NO	NO	NO	NO	NO
FBgn0016701	Rab4	3	NO	NO	YES	NO	NA	YES	35.1569	16.9717	4	YES	YES	YES	NA	NA	NA	NA	NA	NO	NO
FBgn0000721	for	3	NO	NO	NO	YES	NA	NO	50.9121	7.67208	4	YES	YES	YES	NO	NO	NO	NO	NO	NO	NO
FBgn0038810	Srp72	3	NO	NO	NO	YES	NA	NO	33.5118	13.2042	4	YES	YES	YES	NA	NA	NA	NO	NO	NO	NO
FBgn0038829	CG17271	3	NO	YES	NO	NO	NA	YES	129.173	33.4766	4	NO	NO	NO	YES	YES	YES	NO	NO	NO	NO
FBgn0038476	kuk	3	NO	NO	NO	NO	NA	NO	14.2252	40.301	4	NO	NO	NO	YES	YES	YES	NO	NO	NO	NO
FBgn0027079	ValRS	3	NO	NO	NO	NO	NA	NO	14.4493	5.32146	4	YES	YES	YES	NO	NO	NO	NO	NO	NO	NO
FBgn0037709	CG8199	3	NO	NO	NO	NO	NA	NO	2.52312	3.24505	4	YES	YES	YES	NO	NO	NO	NO	NA	NA	NO
FBgn0032480	Edem2	3	NO	NO	NO	NO	NA	NO	25.2201	6.9543	4	NO	NO	NO	YES	YES	YES	NO	NO	NO	NO
FBgn0035333	CG1317	3	NO	NO	NO	NO	NA	NO	24.8423	61.3035	4	NO	NO	NO	YES	YES	YES	NO	NO	NO	NO
FBgn0000477	DNaseII	3	NO	NO	NO	NO	NA	NO	39.8404	2.34308	4	NO	NO	NO	YES	YES	YES	NO	NO	NO	NO
FBgn0000326	clt	3	NO	NO	NO	NO	NA	NO	3.86963	3.08529	4	YES	YES	YES	NO	NO	NO	NO	NO	NO	NO
FBgn0053113	Rtnl1	3	NO	NO	NO	YES	NA	NO	68.9613	96.9262	4	YES	YES	YES	NO	NO	NO	NO	NO	NO	NO
FBgn0040273	Spt5	3	NO	NO	NO	NO	NA	NO	15.0352	7.04578	4	YES	YES	YES	NO	NO	NO	NA	NA	NO	NO
FBgn0261934	dikar	3	NO	NO	NO	NO	NA	NO	3.6276	10.5871	4	NO	NO	NO	YES	YES	YES	NO	NO	NO	NO
FBgn0085423	GramD1B	3	NO	NO	NO	NO	SC	YES	8.09723	6.71634	4	YES	YES	YES	NO	NO	NO	NO	NO	NO	NO
FBgn0036837	CG18135	3	NO	YES	NO	NO	NA	YES	8.23276	11.7625	4	YES	YES	YES	NO	NO	NO	NO	NO	NO	NO
FBgn0001297	kay	3	NO	NO	NO	NO	NA	NO	37.3005	11.3791	4	NO	NO	NO	YES	YES	YES	NO	NO	NO	NO
FBgn0040305	MTF-1	3	NO	NO	NO	NO	NA	NO	4.89991	3.5717	4	NO	NO	NO	YES	YES	YES	NO	NO	NO	NO
FBgn0039223	CG5805	3	NO	NO	NO	NO	NA	NO	5.13211	5.92157	4	YES	YES	YES	NA	NA	NA	NO	NO	NO	NO
FBgn0083969	CG34133	3	NO	NO	NO	NO	NA	NO	4.96817	47.0787	4	YES	YES	YES	NO	NO	NO	NO	NO	NO	NO
FBgn0028487	f-cup	3	NO	NO	NO	NO	NA	NO	8.04809	149.025	4	YES	YES	YES	NO	NO	NO	NO	NO	NO	NO
FBgn0015949	hrg	3	NO	NO	NO	NO	NA	NO	13.1965	13.3509	4	NO	NO	NO	YES	YES	YES	NO	NO	NO	NO
FBgn0036556	hzg	3	NO	NO	NO	NO	NA	NO	9.44799	10.4198	4	NO	NO	NO	YES	YES	YES	NO	NO	NO	NO
FBgn0035150	Rev1	3	NO	NO	NO	NO	NA	NO	1.69922	7.3942	3	YES	YES	YES	NO	NO	NO	NO	NO	NO	NO
FBgn0025336	CG4882	3	NO	NO	NO	NO	NA	NO	16.7927	13.7734	4	NA	NA	NA	YES	YES	YES	NO	NO	NO	NO
FBgn0039629	CG11842	3	NO	NO	NO	NO	NA	NO	0.687949	8.31929	2	NO	NO	NO	YES	YES	YES	NO	NO	NO	NO
FBgn0023095	caps	3	NO	NO	NO	NO	NA	NO	35.0409	7.44551	4	NO	NO	NO	YES	YES	YES	NO	NO	NO	NO
FBgn0040308	Jafrac2	3	NO	YES	NO	YES	NA	YES	70.834	208.45	4	NO	NO	NO	YES	YES	YES	NO	NO	NA	NO
FBgn0028473	Non1	3	NO	NO	NO	NO	NA	NO	145.839	23.791	4	YES	YES	YES	NO	NO	NO	NO	NO	NO	NO
FBgn0003162	Pu	3	NO	NO	NO	NO	NA	NO	0.154101	0.92381	2	NO	NO	NO	YES	YES	YES	NO	NO	NO	NO
FBgn0034025	Pgant1	3	NO	NO	NO	NO	NA	NO	9.03158	6.76449	4	YES	YES	YES	NO	NO	NO	NO	NO	NO	NO
FBgn0260965	CG42588	3	NO	NO	NO	NO	NA	NO	0.786311	4.16531	4	NO	NO	NO	YES	YES	YES	NO	NO	NO	YES
FBgn0036365	cmb	3	NO	NO	NO	NO	NA	NO	5.77635	58.9018	4	NO	NO	NO	YES	YES	YES	NO	NO	NO	NO
FBgn0034172	CG6665	3	NO	NO	NO	NO	NA	NO	11.0277	14.0182	4	YES	YES	YES	NO	NO	NO	NO	NO	NO	NO
FBgn0004876	cdi	3	NO	NO	NO	NO	NA	NO	6.96669	30.5383	4	NO	NO	NO	YES	YES	YES	NO	NO	NO	NO
FBgn0035542	DOR	3	NO	NO	NO	NO	NA	NO	40.6625	135.985	4	YES	YES	YES	NO	NO	NO	NO	NO	NO	NO
FBgn0034491	Hsl	3	NO	NO	NO	NO	NA	NO	8.34988	17.1289	4	NO	NO	NO	YES	YES	YES	NO	NO	NO	NO
FBgn0261850	Xpd	3	NO	NO	NO	NO	NA	NO	2.69447	5.05898	4	NO	NO	NO	YES	YES	YES	NO	NO	NO	NO
FBgn0031608	CG15435	3	NO	NO	NO	NO	NA	NO	1.81686	15.7882	4	YES	YES	YES	NA	NA	NA	NO	NO	NO	NO
FBgn0005616	msl-2	3	NO	NO	NO	NO	NA	NO	4.18726	2.93103	4	NO	NO	NO	YES	YES	YES	NO	NO	NO	NO
FBgn0027492	wdb	3	NO	NO	NO	NO	NA	NO	14.2838	7.31432	4	YES	YES	YES	NO	NO	NO	NO	NO	NO	NO
FBgn0031893	MICU1	3	NO	NO	NO	NO	NA	NO	10.8918	18.1826	4	YES	YES	YES	NO	NO	NO	NO	NO	NA	NO
FBgn0035532	CG15014	3	NO	NO	NO	NO	NA	NO	7.28122	49.4285	4	YES	YES	YES	NO	NO	NO	NA	NA	NO	NO
FBgn0034243	Ns2	3	NO	NO	NO	NO	NA	NO	15.8992	20.1583	4	NO	NO	NO	YES	YES	YES	NA	NA	NO	NO
FBgn0034394	CG15096	3	NO	NO	NO	NO	NA	NO	33.8493	23.1787	4	YES	YES	YES	NO	NO	NO	NO	NO	NO	NO
FBgn0027932	Akap200	3	NO	NO	NO	YES	NA	NO	47.74	202.254	4	NO	NO	NO	YES	YES	YES	NO	NO	NO	NO
FBgn0260632	dl	3	NO	NO	NO	NO	NA	NO	9.07282	8.02189	4	YES	YES	YES	NO	NO	NO	NO	NO	NO	NO
FBgn0033816	CG4679	3	NO	NO	NO	NO	NA	NO	2.16869	12.4121	4	YES	YES	YES	NO	NO	NO	NO	NO	NO	NO
FBgn0261822	Bsg	3	NO	NO	YES	YES	NA	YES	17.1729	41.4079	4	YES	YES	YES	NO	NO	NO	NO	NO	NO	NO
FBgn0266696	Svil	3	NO	NO	NO	YES	NA	NO	26.5832	172.335	4	NO	NO	NO	YES	YES	YES	NO	NO	NO	NO
FBgn0261564	ReepA	3	NO	NO	NO	NO	NA	NO	5.58668	98.2275	4	NO	NO	NO	YES	YES	YES	NA	NA	NO	NO
FBgn0034694	Plekhm1	3	NO	NO	NO	NO	NA	NO	5.06959	3.05316	4	YES	YES	YES	NO	NO	NO	NO	NO	NO	NO
FBgn0039751	CG1983	3	NO	NO	NO	NO	NA	NO	5.48062	11.15	4	NO	NO	NO	YES	YES	YES	NO	NO	NO	NO
FBgn0067102	GlcT	3	NO	NO	NO	NO	NA	NO	6.54391	7.05249	4	YES	YES	YES	NO	NO	NO	NO	NO	NO	NO
FBgn0011236	ken	3	NO	NO	NO	NO	NA	NO	6.41891	11.9914	4	NA	NA	NA	YES	YES	YES	NA	NA	NA	NO
FBgn0036460	CG5114	3	NO	NO	NO	NO	NA	NO	9.95419	20.3117	4	YES	YES	YES	NO	NO	NO	NO	NO	NA	NO
FBgn0036614	Golgin104	3	NO	NO	NO	NO	NA	NO	1.56212	15.7667	4	NO	NO	NO	YES	YES	YES	NO	NO	NO	NO
FBgn0034728	rad50	3	NO	NO	NO	NO	NA	NO	5.77923	4.53991	4	YES	YES	YES	NO	NO	NO	NO	NO	NO	NO
FBgn0041182	Tep2	3	NO	NO	NO	NO	NA	NO	9.54722	10.0327	4	YES	YES	YES	NO	NO	NO	NO	NO	NO	NO
FBgn0039800	Npc2g	3	NO	NO	NO	NO	NA	NO	2.37985	3.23014	4	YES	YES	YES	NO	NO	NO	NO	NO	NO	NO
FBgn0032646	mEFTs	3	NO	NO	NO	NO	NA	NO	11.347	353.463	4	YES	YES	YES	NO	NO	NO	NO	NO	NO	NO
FBgn0034398	CG15098	3	NO	NO	NO	NO	NA	NO	249.907	128.186	4	NO	NO	NO	YES	YES	YES	NO	NO	NO	NO
FBgn0031534	Snx1	3	NO	NO	NO	NO	NA	NO	31.4312	28.5926	4	NO	NO	NO	YES	YES	YES	NO	NO	NO	NO
FBgn0036318	Wbp2	3	NO	NO	NO	YES	NA	NO	86.2512	115.169	4	YES	YES	YES	NO	NO	NO	NO	NO	NO	NO
FBgn0034346	PIG-O	3	NO	NO	NO	NO	NA	NO	1.9712	5.10725	4	YES	YES	YES	NO	NO	NO	NO	NO	NO	NO
FBgn0034417	CG15117	3	NO	YES	NO	NO	NA	YES	299.149	61.3744	4	NO	NO	NO	YES	YES	YES	NO	NO	NO	NO
FBgn0052311	zormin	3	NO	NO	NO	YES	NA	NO	9.91152	4.95786	4	NO	NO	NO	YES	YES	YES	NO	NO	NO	NO
FBgn0034646	Rae1	3	NO	NO	NO	NO	NA	NO	7.64402	24.852	4	YES	YES	YES	NA	NA	NA	NO	NO	NA	NO
FBgn0034113	CG8060	3	NO	NO	NO	NO	NA	NO	2.31001	3.9246	4	NO	NO	NO	YES	YES	YES	NO	NO	NO	NO
FBgn0026369	Sara	3	NO	NO	NO	NO	NA	NO	7.44393	5.12032	4	YES	YES	YES	NO	NO	NO	NO	NO	NO	NO
FBgn0027497	Madm	3	NO	NO	NO	NO	NA	NO	11.3228	9.84348	4	NO	NO	NO	YES	YES	YES	NA	NA	NO	NO
FBgn0261020	wol	3	NO	NO	NO	NO	NA	NO	34.326	17.2301	4	YES	YES	YES	NO	NO	NO	NO	NO	NO	NO
FBgn0032032	CG17294	3	NO	NO	NO	YES	NA	NO	5.94941	3.90026	4	NA	NA	NA	YES	YES	YES	NO	NO	NO	NO
FBgn0034854	Golgin245	3	NO	NO	NO	YES	NA	NO	12.5051	7.6623	4	YES	YES	YES	NO	NO	NO	NO	NO	NO	NO
FBgn0024285	Srp54	3	NO	NO	NO	NO	NA	NO	9.73786	6.9867	4	NA	NA	NA	YES	YES	YES	NO	NO	NO	NO
FBgn0287825	Vha44	3	NO	NO	NO	NO	NA	NO	32.5131	72.3464	4	YES	YES	YES	NO	NO	NO	NO	NO	NO	NO
FBgn0028429	I-2	3	NO	NO	NO	NO	NA	NO	13.0049	100.631	4	NO	NO	NO	YES	YES	YES	NO	NO	NO	NO
FBgn0051343	CG31343	3	NO	NO	NO	NO	NA	NO	0	0.087229	1	NO	NO	NA	YES	YES	YES	NA	NO	NO	NO
FBgn0085453	Mthfs	3	NO	NO	NO	YES	NA	NO	5.10349	1.37092	2	NO	NO	NO	YES	YES	YES	NO	NO	NO	NO
FBgn0038686	CG5555	3	NO	NO	NO	NO	NA	NO	6.43274	116.149	4	NO	NO	NO	YES	YES	YES	NO	NO	NO	NO
FBgn0036398	upSET	3	NO	NO	NO	NO	NA	NO	9.78059	8.12291	4	NO	NO	NO	YES	YES	YES	NO	NO	NA	NO
FBgn0040323	GNBP1	3	NO	NO	NO	NO	NA	NO	1.57096	0.969229	4	YES	YES	YES	NO	NO	NO	NO	NA	NO	NO
FBgn0033656	S2P	3	NO	NO	NO	NO	NA	NO	13.3753	21.3177	4	YES	YES	YES	NO	NO	NO	NO	NO	NO	NO
FBgn0267828	Fatp1	3	NO	NO	NO	NO	MC	YES	46.7652	5.82737	4	NO	NO	NO	YES	YES	YES	NO	NO	NO	NO
FBgn0262524	ver	3	NO	NO	NO	NO	NA	NO	0.374045	25.2327	4	NO	NO	NO	YES	YES	YES	NO	NO	NO	YES
FBgn0011774	Irbp	3	NO	NO	NO	NO	NA	NO	2.30343	4.2755	3	YES	YES	YES	NO	NO	NO	NO	NO	NO	NO
FBgn0036372	Abp1	3	NO	NO	NO	NO	NA	NO	3.35963	8.38478	4	NO	NO	NO	YES	YES	YES	NO	NO	NO	NO
FBgn0043884	mask	3	NO	NO	NO	NO	NA	NO	13.5012	9.41164	4	YES	YES	YES	NO	NO	NO	NO	NO	NO	NO
FBgn0022787	Hel89B	3	NO	NO	NO	NO	NA	NO	18.2051	6.58014	4	YES	YES	YES	NO	NO	NO	NO	NO	NO	NO
FBgn0001108	DCTN1-p150	3	NO	NO	NO	NO	NA	NO	8.53414	14.8939	4	NO	NO	NO	YES	YES	YES	NO	NO	NO	NO
FBgn0015795	Rab7	3	NO	NO	NO	YES	NA	NO	112.382	125.346	4	YES	YES	YES	NA	NA	NA	NO	NO	NO	NO
FBgn0085405	CG34376	3	NO	NO	NO	NO	NA	NO	6.01886	17.8903	4	YES	YES	YES	NO	NA	NO	NO	NO	NO	NO
FBgn0027529	tapas	3	NO	NO	NO	NO	NA	NO	25.6481	27.2034	4	NA	NA	NA	YES	YES	YES	NO	NO	NO	NO
FBgn0004509	Fur1	3	NO	NO	NO	NO	NA	NO	3.99796	12.7926	4	YES	YES	YES	NA	NA	NA	NO	NO	NO	NO
FBgn0032031	CG13390	3	NO	NO	NO	NO	NA	NO	3.7144	2.767	2	NA	NA	NA	YES	YES	YES	NO	NO	NO	NO
FBgn0035249	CG17249	3	NO	NO	NO	NO	NA	NO	2.01414	5.67906	2	NO	NO	NO	YES	YES	YES	NO	NO	NO	NO
FBgn0033225	TTLL12	3	NO	NO	NO	NO	NA	NO	8.37226	5.79611	4	NA	NA	NA	YES	YES	YES	NA	NA	NA	NO
FBgn0029155	Men-b	3	NO	NO	NO	NO	NA	NO	8.85384	48.445	4	YES	YES	YES	NO	NO	NO	NO	NO	NO	NO
FBgn0036136	Ufd1	3	NO	NO	NO	NO	NA	NO	13.6053	131.281	4	YES	YES	YES	NO	NO	NO	NO	NO	NO	NO
FBgn0001125	Got2	3	NO	NO	NO	YES	NA	NO	47.7157	157.36	4	YES	YES	YES	NO	NO	NO	NO	NO	NO	NO
FBgn0027363	Stam	3	NO	NO	NO	NO	NA	NO	18.8265	30.2942	4	NO	NO	NO	YES	YES	YES	NO	NO	NO	NO
FBgn0020305	dbe	3	NO	NO	NO	NO	NA	NO	9.27203	13.5814	4	NO	NO	NO	YES	YES	YES	NO	NO	NO	NO
FBgn0033446	CG1648	3	NO	NO	NO	YES	NA	NO	222.992	101.203	4	YES	YES	YES	NO	NO	NO	NO	NO	NO	NO
FBgn0000565	MsrA	3	NO	NO	NO	NO	NA	NO	12.5744	20.8211	4	NO	NO	NO	YES	YES	YES	NO	NO	NO	NO
FBgn0033205	CG2064	3	NO	NO	NO	NO	NA	NO	6.10344	9.13233	4	YES	YES	YES	NO	NO	NA	NO	NO	NO	NO
FBgn0038601	Polr1E	3	NO	NO	NO	NO	NA	NO	4.83418	15.4813	4	YES	YES	YES	NO	NO	NO	NO	NO	NO	NO
FBgn0031566	CG2818	3	NO	NO	NO	NO	NA	NO	6.25026	10.792	4	YES	YES	YES	NO	NO	NO	NO	NO	NO	NO
FBgn0025684	MFS18	3	NO	NO	NO	NO	NA	NO	15.7726	8.81474	4	YES	YES	YES	NA	NA	NA	NO	NO	NO	NO
FBgn0039766	CG15536	3	NO	NO	NO	NO	NA	NO	3.12588	77.9307	2	NA	NA	NA	YES	YES	YES	NA	NA	NA	NO
FBgn0042134	Capr	3	NO	NO	NO	NO	NA	NO	52.6305	36.9531	4	YES	YES	YES	NO	NO	NO	NO	NO	NO	NO
FBgn0033402	Myd88	3	NO	NO	NO	NO	NA	NO	16.6865	8.04929	4	YES	YES	YES	NO	NO	NO	NO	NO	NO	NO
FBgn0024245	dnt	3	NO	NO	NO	NO	NA	NO	1.55867	7.23205	4	YES	YES	YES	NO	NO	NO	NO	NO	NO	NO
FBgn0034277	OstDelta	3	NO	YES	NO	YES	NA	YES	222.248	37.6714	4	YES	YES	YES	NO	NO	NO	NO	NO	NO	NO
FBgn0053523	CG33523	3	NO	NO	NO	YES	NA	NO	44.6983	330.153	4	NO	NO	NO	YES	YES	YES	NO	NO	NO	NO
FBgn0039863	CG1815	3	NO	NO	NO	NO	NA	NO	9.97094	8.4386	4	YES	YES	NO	NO	YES	NO	NO	NO	NO	NO
FBgn0027505	Rab3-GAP	3	NO	NO	NO	NO	NA	NO	9.79556	290.335	4	NO	NO	NO	YES	YES	YES	NO	NO	NO	NO
FBgn0033972	Ciao1	3	NO	NO	NO	NO	NA	NO	22.8288	16.4147	4	NO	NO	NO	YES	YES	YES	NA	NA	NO	NO
FBgn0034689	CG2921	3	NO	NO	NO	NO	NA	NO	8.38193	200.28	4	YES	YES	YES	NO	NO	NO	NO	NO	NO	NO
FBgn0002775	msl-3	3	NO	NO	NO	NO	NA	NO	6.35397	17.7294	2	NA	NA	NA	YES	YES	YES	NO	NO	NO	NO
FBgn0035953	CG5087	3	NO	NO	NO	NO	NA	NO	5.23562	8.49518	4	NO	NO	NO	YES	YES	YES	NO	NO	NO	NO
FBgn0039210	CG13625	3	NO	NO	NO	NO	NA	NO	5.40921	2.58067	0	YES	YES	YES	NA	NA	NA	NO	NO	NO	NO
FBgn0051040	Cog7	3	NO	NO	NO	NO	NA	NO	9.38714	4.25353	4	NO	NO	NO	YES	YES	YES	NO	NO	NO	NO
FBgn0266670	Sec5	3	NO	NO	NO	NO	NA	NO	7.86573	5.54828	4	NO	NO	NO	YES	YES	YES	NO	NO	NO	NO
FBgn0263241	Mocs1	3	NO	NO	NO	NO	NA	NO	2.51952	3.26404	4	NO	NO	NO	YES	YES	YES	NO	NO	NO	NO
FBgn0261885	osa	3	NO	NO	NO	NO	NA	NO	10.2037	5.851	4	NO	NO	NO	YES	YES	YES	NO	NO	NO	NO
FBgn0035824	CG8281	3	NO	NO	NO	NO	NA	NO	5.95328	4.58143	2	NA	NA	NA	YES	YES	YES	NO	NO	NO	NO
FBgn0039768	CG15533	3	NO	NO	NO	NO	NA	NO	0	0	0	NA	NA	NA	YES	YES	YES	NA	NA	NO	NO
FBgn0266671	Sec6	3	NO	NO	NO	NO	NA	NO	6.79458	6.22265	3	YES	YES	YES	NO	NO	NO	NO	NO	NO	NO
FBgn0036775	Polr3D	3	NO	NO	NO	NO	NA	NO	10.0228	12.9627	4	NO	NO	NO	YES	YES	YES	NO	NO	NO	NO
FBgn0086706	pix	3	NO	NO	NO	NO	NA	NO	223.394	66.9827	4	NO	NO	NO	YES	YES	YES	NO	NO	NO	NO
FBgn0028980	tant	3	NO	NO	NO	NO	NA	NO	2.59189	127.865	4	NO	NO	NO	YES	YES	YES	NO	NO	NO	NO
FBgn0052103	SCaMC	3	NO	NO	NO	NO	NA	NO	22.8106	20.0587	4	NO	NO	NO	YES	YES	YES	NO	NO	NO	NO
FBgn0039623	CG1951	3	NO	NO	NO	NO	NA	NO	5.45105	9.79533	4	NO	NO	NO	YES	YES	YES	NO	NO	NO	NO
FBgn0267408	AOX1	3	NO	NO	NO	YES	NA	NO	30.2952	18.8796	4	NO	NO	NO	YES	YES	YES	NA	NA	NA	NO
FBgn0036302	sowah	3	NO	NO	NO	NO	NA	NO	22.6765	5.73508	4	YES	YES	YES	NO	NO	NO	NO	NO	NO	NO
FBgn0035244	ABCB7	3	NO	NO	NO	NO	NA	NO	12.2849	34.6844	4	NO	NO	NO	YES	YES	YES	NO	NO	NO	NO
FBgn0026079	Nsun2	3	NO	NO	NO	NO	NA	NO	7.32434	5.7061	4	NA	NA	NA	YES	YES	YES	NO	NO	NO	NO
FBgn0036107	galla-2	3	NO	NO	NO	NO	NA	NO	15.3289	20.6886	4	NO	NO	NO	YES	YES	YES	NO	NO	NO	NO
FBgn0038388	CG4287	3	NO	NO	NO	NO	NA	NO	2.63395	35.0687	4	YES	YES	YES	NO	NO	NO	NO	NO	NA	NO
FBgn0036454	CG17839	3	NO	NO	NO	NO	NA	NO	2.67616	8.7701	4	NO	NO	NO	YES	YES	YES	NO	NO	NO	NO
FBgn0034455	CG11007	3	NO	NO	NO	NO	NA	NO	3.8806	36.8409	4	NO	NO	NO	YES	YES	YES	NO	NO	NO	NO
FBgn0034729	CG10344	3	NO	NO	NO	NO	NA	NO	1.1136	35.6261	4	YES	YES	YES	NA	NA	NA	NA	NA	NO	NO
FBgn0037924	CG14712	3	NO	NO	NO	NO	NA	NO	2.29879	105.267	4	YES	YES	YES	NO	NO	NO	NA	NA	NA	NO
FBgn0032454	CG5787	3	NO	NO	NO	NO	NA	NO	16.6937	20.4762	4	YES	YES	YES	NO	NO	NO	NO	NO	NO	NO
FBgn0036316	nebu	3	NO	NO	NO	YES	NA	NO	24.9741	21.2879	4	YES	YES	YES	NO	NO	NO	NO	NO	NO	NO
FBgn0011207	pelo	3	NO	NO	NO	NO	NA	NO	14.0791	23.4821	4	NO	NO	NO	YES	YES	YES	NO	NO	NO	NO
FBgn0024194	rasp	3	NO	NO	NO	NO	NA	NO	13.3132	1.27758	4	YES	YES	YES	NO	NO	NO	NO	NO	NO	NO
FBgn0003209	raw	3	NO	NO	NO	NO	NA	NO	5.90578	3.83474	4	YES	YES	YES	NO	NO	NO	NO	NO	NO	NO
FBgn0025525	bab2	3	NO	NO	NO	NO	NA	NO	0.745196	2.45469	3	YES	YES	YES	NO	NO	NO	NO	NA	NO	NO
FBgn0036059	nudE	3	NO	NO	NO	NO	NA	NO	19.6018	133.586	4	NO	NO	NO	YES	YES	YES	NO	NO	NO	NO
FBgn0033915	CG8485	3	NO	NO	NO	NO	NA	NO	5.41087	24.2659	4	NO	NO	NO	YES	YES	YES	NO	NO	NO	NO
FBgn0261552	ps	3	NO	NO	NO	NO	NA	NO	31.2314	158.642	4	NO	NO	NO	YES	YES	YES	NO	NO	NO	NO
FBgn0003278	Polr1B	3	NO	NO	NO	NO	NA	NO	2.28912	1.34693	3	NO	NO	NO	YES	YES	YES	NO	NO	NA	NO
FBgn0020312	Tmtc3	3	NO	NO	NO	NO	NA	NO	3.33823	2.19025	4	YES	YES	YES	NO	NO	NO	NO	NO	NO	NO
FBgn0033212	LRR	3	NO	NO	NO	NO	NA	NO	31.6224	9.26862	4	NO	NO	NO	YES	YES	YES	NO	NO	NO	NO
FBgn0035490	CG1136	3	NO	NO	NO	NO	NA	NO	0.181573	1.84073	2	NO	NO	NO	YES	YES	YES	NO	NO	NO	NO
FBgn0036239	Pop2	3	NO	NO	NO	NO	NA	NO	21.7531	118.929	4	NO	NO	NO	YES	YES	YES	NO	NO	NO	NO
FBgn0052262	CG32262	3	NO	NO	NO	NO	NA	NO	6.50712	153.28	4	YES	YES	YES	NO	NO	NO	NO	NO	NO	NO
FBgn0037979	GCC185	3	NO	NO	NO	NO	NA	NO	10.7201	15.6138	4	YES	YES	YES	NO	NO	NO	NO	NO	NO	NO
FBgn0038349	AOX3	3	NO	NO	YES	YES	NA	YES	44.689	17.7871	4	NO	NO	NO	YES	YES	YES	NO	NO	NA	NO
FBgn0053196	dpy	3	NO	NO	NO	NO	NA	NO	0.697155	0.166666	4	YES	YES	YES	NA	NA	NA	NO	NO	NO	YES
FBgn0033971	CG10209	3	NO	NO	NO	NO	NA	NO	4.26107	5.22731	4	YES	YES	YES	NA	NA	NA	NA	NA	NO	NO
FBgn0038742	Arc42	3	NO	NO	NO	NO	NA	NO	5.0335	10.8793	4	YES	YES	YES	NA	NA	NA	NO	NO	NO	NO
FBgn0034859	CG3520	3	NO	NO	NO	NO	NA	NO	1.48362	1.32695	2	NO	NO	NO	YES	YES	YES	NA	NO	NO	NO
FBgn0035383	CPT2	3	NO	NO	NO	NO	NA	NO	6.2021	3.61768	4	YES	YES	YES	NO	NO	NO	NO	NO	NO	NO
FBgn0032138	CG4364	3	NO	NO	NO	NO	NA	NO	89.9392	20.7255	4	NO	NO	NO	YES	YES	YES	NA	NA	NO	NO
FBgn0038473	Ns1	3	NO	NO	NO	NO	NA	NO	15.3843	12.0736	4	NO	NO	NO	YES	YES	YES	NO	NO	NO	NO
FBgn0036386	CG8833	3	NO	NO	NO	NO	NA	NO	1.38774	7.14227	2	NO	NO	NO	YES	YES	YES	NO	NO	NO	NO
FBgn0031857	LUBEL	3	NO	NO	NO	NO	NA	NO	4.14471	0.846212	4	NO	YES	NA	NO	YES	YES	NO	NO	NA	NO
FBgn0046113	GluRIIC	3	NO	NO	NO	NO	NA	NO	1.7009	3.82378	4	YES	YES	NA	NO	YES	NO	NO	NA	NO	NO
FBgn0030872	Ucp4A	3	NO	NO	NO	NO	NA	NO	6.97298	2.02609	3	NO	NO	NO	YES	YES	YES	NO	NO	NO	NO
FBgn0261836	Msp300	3	NO	NO	NO	NO	NA	NO	17.376	12.8985	4	YES	YES	YES	NO	NO	NO	NO	NO	NO	NO
FBgn0028648	mRpL50	3	NO	NO	NO	NO	NA	NO	5.11183	50.5888	4	NA	NA	NA	YES	YES	YES	NA	NA	NA	NO
FBgn0028542	NimB4	3	NO	NO	NO	NO	NA	NO	0.455822	0.721325	0	NO	NO	NO	YES	YES	YES	NO	NO	NA	NO
FBgn0011481	Ssdp	3	NO	NO	NO	NO	NA	NO	9.96501	5.03552	4	NO	NO	NO	YES	YES	YES	NO	NO	NO	NO
FBgn0039628	CG11841	3	NO	NO	NO	NO	NA	NO	0.901427	4.22868	4	NO	NO	NO	YES	YES	YES	NO	NO	NO	YES
FBgn0284257	Ttd14	3	NO	NO	YES	NO	SC	YES	19.9201	23.8828	4	NO	NO	NO	YES	YES	YES	NO	NO	NO	NO
FBgn0003093	Pkc98E	3	NO	NO	NO	NO	NA	NO	7.23476	3.69475	4	NO	NO	NO	YES	YES	YES	NO	NO	NO	NO
FBgn0038195	CG3061	3	NO	NO	NO	NO	NA	NO	58.498	117.698	4	NO	NO	NO	YES	YES	YES	NO	NO	NO	NO
FBgn0262559	Mdh2	3	NO	NO	NO	YES	NA	NO	156.444	32.9858	4	NO	NO	NO	YES	YES	YES	NO	NO	NO	NO
FBgn0034797	nahoda	3	NO	NO	YES	NO	SC	YES	4.48363	7.16758	4	NO	NO	NO	YES	YES	YES	NO	NO	NO	NO
FBgn0261065	Cpsf73	3	NO	NO	NO	NO	NA	NO	4.20551	10.1153	4	NO	NO	NO	YES	YES	YES	NA	NA	NO	NO
FBgn0052267	CG32267	3	NO	NO	NO	NO	NA	NO	22.0584	536.013	1	NA	NA	NA	YES	YES	YES	NO	NO	NO	NO
FBgn0262937	Rabex-5	3	NO	NO	NO	NO	NA	NO	4.99626	10.2677	4	NO	NO	NO	YES	YES	YES	NO	NO	NO	NO
FBgn0285917	sbb	3	NO	NO	NO	NO	SC	YES	6.15658	4.52176	4	YES	YES	YES	NO	NO	NO	NO	NO	NO	NO
FBgn0015000	betaggt-I	3	NO	NO	NO	NO	NA	NO	65.4161	6.36011	4	YES	YES	YES	NA	NA	NA	NO	NO	NO	NO
FBgn0286828	dind	3	NO	NO	NO	NO	NA	NO	5.67014	6.09582	4	NO	NO	NO	YES	YES	YES	NO	NO	NO	NO
FBgn0283681	Tcs3	3	NO	NO	NO	NO	NA	NO	3.70635	4.32947	3	NO	NO	NO	YES	YES	YES	NO	NO	NO	NO
FBgn0028962	AlaRS-m	3	NO	NO	NO	NO	NA	NO	3.10703	2.59513	4	NO	NO	NO	YES	YES	YES	NO	NO	NO	NO
FBgn0000083	AnxB9	3	NO	NO	NO	YES	NA	NO	171.069	87.4698	4	YES	YES	YES	NO	NO	NO	NO	NO	NO	NO
FBgn0263667	Lpt	3	NO	NO	NO	NO	NA	NO	16.4638	2.22751	4	NO	NO	NO	YES	YES	YES	NO	NO	NA	NO
FBgn0003520	stau	3	NO	NO	NO	NO	NA	NO	3.85411	10.6598	4	YES	YES	YES	NO	NO	NO	NO	NO	NO	NO
FBgn0266377	Pde8	3	NO	NO	NO	NO	EDC	YES	31.3346	12.8485	4	YES	YES	YES	NO	NO	NO	NO	NO	NO	NO
FBgn0284221	Sema5c	3	NO	NO	NO	NO	NA	NO	9.78817	2.28397	4	YES	YES	YES	NO	NO	NO	NO	NO	NO	NO
FBgn0036298	nst	3	NO	NO	NO	NO	NA	NO	6.94151	2.0349	4	NO	NO	NO	YES	YES	YES	NO	NO	NO	NO
FBgn0038412	Zip89B	3	NO	NO	NO	NO	NA	NO	2.34869	2.71097	0	YES	YES	YES	NO	NO	NO	NO	NO	NO	NO
FBgn0052137	CG32137	3	NO	NO	NO	NO	NA	NO	18.0607	37.463	4	NO	NO	NO	YES	YES	YES	NO	NO	NO	NO
FBgn0036666	TSG101	3	NO	NO	NO	NO	NA	NO	14.8551	413.748	4	NA	NA	NA	YES	YES	YES	NA	NA	NA	NO
FBgn0033379	Mys45A	3	NO	NO	NO	NO	NA	NO	9.2944	5.86196	4	YES	YES	YES	NO	NO	NO	NO	NO	NA	NO
FBgn0039637	Ctl2	3	NO	NO	NO	NO	NA	NO	15.6597	26.0068	4	NO	NO	NO	YES	YES	YES	NO	NO	NO	NO
FBgn0034366	Atg7	3	NO	NO	NO	NO	NA	NO	2.74428	6.98712	3	YES	YES	YES	NO	NO	NO	NO	NO	NO	NO
FBgn0034425	CG11906	3	NO	NO	NO	NO	NA	NO	3.68456	6.64483	4	YES	YES	YES	NO	NO	NO	NO	NO	NO	NO
FBgn0021872	Xbp1	3	NO	NO	NO	NO	NA	NO	283.538	48.7718	4	NO	NO	NO	YES	YES	YES	NO	NO	NO	NO
FBgn0035688	fmt	3	NO	NO	NO	NO	NA	NO	9.45518	5.57119	4	NO	NO	NO	YES	YES	YES	NO	NO	NO	NO
FBgn0015513	mbc	3	NO	NO	NO	NO	NA	NO	5.00192	3.25079	4	YES	YES	YES	NO	NO	NO	NO	NO	NO	NO
FBgn0034091	mrj	3	NO	NO	NO	NO	NA	NO	9.13232	516.91	4	YES	YES	YES	NO	NO	NO	NO	NO	NO	NO
FBgn0011289	TfIIA-L	3	NO	NO	NO	NO	NA	NO	27.5047	46.8513	4	YES	YES	YES	NO	NO	NO	NO	NO	NO	NO
FBgn0264490	Eip93F	3	NO	NO	NO	NO	NA	NO	26.0068	5.01206	4	NO	NO	NO	YES	YES	YES	NO	NO	NO	NO
FBgn0036144	GlcAT-P	3	NO	NO	NO	NO	MC	YES	16.3896	2.0402	4	NA	NO	NO	YES	YES	YES	NO	NO	NO	NO
FBgn0023001	melt	3	NO	NO	NO	NO	NA	NO	1.96766	1.24111	4	NO	NO	NO	YES	YES	YES	NO	NO	NO	NO
FBgn0037958	CG6962	3	NO	NO	NO	NO	NA	NO	2.31032	7.53244	3	YES	YES	YES	NO	NO	NO	NO	NO	NO	NO
FBgn0035318	CG9018	3	NO	NO	NO	NO	NA	NO	7.06572	27.2479	1	NO	NO	NO	YES	YES	YES	NA	NA	NA	NO
FBgn0024234	gbb	3	NO	YES	YES	NO	NA	YES	45.407	15.7917	4	NA	NA	NA	YES	YES	YES	NA	NA	NA	NO
FBgn0027081	ThrRS	3	NO	NO	NO	YES	NA	NO	28.0196	26.2965	4	NO	NO	NO	YES	YES	YES	NO	NO	NO	NO
FBgn0024315	Picot	3	NO	NO	NO	NO	NA	NO	16.1064	32.102	4	NA	NA	NA	YES	YES	YES	NO	NO	NO	NO
FBgn0025874	Meics	3	NO	NO	NO	NO	NA	NO	4.05129	4.52379	3	YES	YES	YES	NO	NO	NO	NO	NO	NO	NO
FBgn0027080	TyrRS	3	NO	NO	NO	NO	NA	NO	25.5839	15.0376	4	YES	YES	YES	NO	NO	NO	NO	NO	NO	NO
FBgn0260935	Vps15	3	NO	NO	NO	NO	NA	NO	10.5498	2.5039	4	NO	NO	NO	YES	YES	YES	NO	NO	NO	NO
FBgn0035947	Srp68	3	NO	NO	NO	NO	NA	NO	59.3749	26.1531	4	NO	NO	NO	YES	YES	YES	NO	NO	NO	NO
FBgn0034067	CG8399	3	NO	NO	YES	NO	NA	YES	2.71508	1.58169	4	YES	YES	YES	NO	NO	NO	NA	NA	NO	NO
FBgn0036547	CG17032	3	NO	NO	NO	NO	NA	NO	16.4658	23.8827	4	YES	YES	YES	NO	NO	NO	NO	NO	NO	NO
FBgn0035590	Tcs5	3	NO	NO	NO	NO	NA	NO	12.1986	9.32251	2	NO	NO	NO	YES	YES	YES	NO	NO	NO	NO
FBgn0264560	garz	3	NO	NO	NO	NO	NA	NO	34.944	24.4669	4	YES	YES	YES	NO	NO	NO	NO	NO	NO	NO
FBgn0287774	CG9143	3	NO	NO	NO	NO	NA	NO	5.24274	1.15273	4	NA	NA	NA	YES	YES	YES	NO	NO	NO	NO
FBgn0034295	CG10911	3	NO	NO	NO	NO	NA	NO	0	0	0	NO	NO	NO	YES	YES	YES	NA	NA	NA	NO
FBgn0038330	CG14868	3	NO	NO	NO	NO	NA	NO	3.17945	34.0676	2	YES	YES	YES	NO	NO	NO	NO	NO	NA	NO
FBgn0011739	wts	3	NO	NO	NO	NO	NA	NO	4.41211	3.93735	4	NO	NO	NO	YES	YES	YES	NO	NO	NO	NO
FBgn0034237	eIF3b	3	NO	NO	NO	YES	NA	NO	214.168	70.6695	4	YES	YES	YES	NO	NO	NO	NO	NO	NO	NO
FBgn0263396	sqd	3	NO	NO	NO	NO	NA	NO	88.8481	55.0734	4	YES	YES	YES	NO	NO	NO	NO	NO	NO	NO
FBgn0035501	CG1299	3	NO	NO	NO	NO	EDC	YES	96.926	0.535646	3	NO	NO	NO	YES	YES	YES	NO	NO	NO	NO
FBgn0036816	Indy	3	NO	NO	NO	NO	NA	NO	4.77576	56.2261	4	NO	NO	NO	YES	YES	YES	NO	NO	NO	NO
FBgn0037794	CG6254	3	NO	NO	NO	NO	NA	NO	1.5839	2.45696	4	YES	YES	YES	NA	NO	NO	NO	NO	NO	NO
FBgn0032224	Sps2	3	NO	NO	NO	NO	NA	NO	13.5674	20.4116	4	NO	NO	NO	YES	YES	YES	NO	NO	NO	NO
FBgn0038569	CG7218	3	NO	NO	NO	NO	NA	NO	6.4519	66.8422	4	YES	YES	YES	NO	NO	NO	NO	NO	NO	NO
FBgn0264489	CG43897	3	NO	NO	NO	NO	NA	NO	47.6428	36.4207	4	NO	NO	NO	YES	YES	YES	NO	NO	NO	NO
FBgn0038211	CG9649	3	NO	NO	NO	NO	NA	NO	0.67226	2.20508	1	NO	NO	NO	YES	YES	YES	NO	NO	NO	NO
FBgn0266084	Fhos	3	NO	NO	NO	YES	NA	NO	12.8499	1.29014	4	NO	NO	NO	YES	YES	YES	NO	NO	NO	NO
FBgn0032822	CG10466	3	NO	NO	NO	NO	NA	NO	3.60612	30.8714	2	YES	YES	YES	NA	NA	NA	NO	NO	NO	NO
FBgn0034387	Cyp12b2	3	NO	NO	NO	NO	NA	NO	3.77241	4.38113	4	YES	YES	YES	NO	NO	NO	NO	NO	NO	NO
FBgn0034494	CG10444	3	NO	NO	NO	NO	NA	NO	1.6756	20.2756	4	NA	NA	NA	YES	YES	YES	NO	NO	NO	NO
FBgn0260860	Bet5	3	NO	NO	NO	NO	NA	NO	4.65737	10.7878	4	NO	NO	NO	YES	YES	YES	NO	NO	NO	NO
FBgn0031782	WDR79	3	NO	NO	NO	NO	NA	NO	3.88652	19.2938	1	YES	YES	YES	NO	NO	NO	NO	NO	NO	NO
FBgn0038972	CG7054	3	NO	NO	NO	NO	NA	NO	58.1708	17.8587	4	YES	YES	YES	NA	NA	NA	NA	NA	NO	NO
FBgn0032208	Ufd4	3	NO	NO	NO	NO	NA	NO	16.6046	42.2266	4	NO	NO	NO	YES	YES	YES	NO	NO	NO	NO
FBgn0086707	ncm	3	NO	NO	NO	NO	NA	NO	48.6333	10.2999	4	NO	NO	NO	YES	YES	YES	NO	NO	NO	NO
FBgn0021979	l(2)k09913	3	NO	NO	NO	NO	NA	NO	26.6674	50.2069	4	NO	NO	NO	YES	YES	YES	NO	NO	NO	NO
FBgn0004360	Wnt2	3	NO	NO	NO	NO	NA	NO	0.150381	10.2367	4	NA	NO	NO	YES	YES	YES	NO	NO	NO	YES
FBgn0032000	CG8372	3	NO	NO	NO	NO	NA	NO	26.7799	64.0477	4	NO	NO	NO	YES	YES	YES	NA	NA	NO	NO
FBgn0039234	Nct	3	NO	NO	NO	NO	NA	NO	11.0616	26.7423	4	YES	YES	YES	NA	NA	NA	NO	NO	NO	NO
FBgn0262527	nsl1	3	NO	NO	NO	NO	NA	NO	8.90251	9.22644	4	YES	YES	YES	NO	NO	NO	NO	NO	NO	NO
FBgn0031633	Fnta	3	NO	NO	NO	NO	NA	NO	6.5491	24.2515	4	YES	YES	YES	NO	NO	NO	NO	NA	NO	NO
FBgn0085427	CG34398	3	NO	NO	NO	NO	NA	NO	0.093244	1.14571	1	NO	NO	NO	YES	YES	YES	NO	NO	NO	NO
FBgn0036240	CG6928	3	NO	NO	NO	NO	NA	NO	50.9631	2.79831	3	NO	NO	NO	YES	YES	YES	NO	NO	NO	NO
FBgn0020762	Atet	3	NO	NO	NO	NO	NA	NO	0.884715	8.0149	4	YES	YES	YES	NO	NO	NO	NO	NO	NO	YES
FBgn0039831	CG12054	3	NO	NO	NO	NO	NA	NO	12.6479	15.9625	4	NO	NO	NO	YES	YES	YES	NO	NO	NO	NO
FBgn0086253	rumi	3	NO	NO	NO	NO	NA	NO	3.81971	6.66881	4	YES	YES	YES	NO	NO	NO	NO	NO	NO	NO
FBgn0261618	larp	3	NO	NO	NO	NO	NA	NO	85.0053	8.63776	4	YES	YES	YES	NO	NO	NO	NO	NO	NO	NO
FBgn0039830	ATPsynC	3	NO	NO	NO	NO	NA	NO	306.644	425.598	4	NO	NO	NO	YES	YES	YES	NO	NO	NO	NO
FBgn0035337	CG15877	3	NO	NO	NO	NO	NA	NO	5.11515	4.62682	2	NO	NO	NO	YES	YES	YES	NO	NO	NO	NO
FBgn0000578	ena	3	NO	NO	NO	NO	NA	NO	1.9919	9.63484	4	YES	YES	YES	NO	NO	NO	NO	NO	NO	NO
FBgn0016698	Ptpa	3	NO	NO	NO	NO	NA	NO	3.65973	13.7967	3	YES	YES	YES	NO	NO	NO	NO	NO	NO	NO
FBgn0034180	Ehbp1	3	NO	NO	NO	NO	NA	NO	6.02766	18.2687	4	YES	YES	YES	NO	NO	NO	NO	NO	NO	NO
FBgn0026427	Su(var)2-HP2	3	NO	NO	NO	YES	NA	NO	2.99371	5.28512	4	NO	NO	NO	YES	YES	YES	NO	NO	NO	NO
FBgn0010583	dock	3	NO	NO	NO	NO	NA	NO	3.66935	28.6527	4	YES	YES	YES	NO	NO	NO	NO	NO	NO	NO
FBgn0012058	Cdc27	3	NO	NO	NO	NO	NA	NO	5.16959	44.0084	4	NO	NO	NO	YES	YES	YES	NO	NO	NO	NO
FBgn0031645	CG3036	3	NO	NO	NO	NO	NA	NO	2.21313	1.03414	4	YES	YES	YES	NO	NO	NO	NO	NO	NO	NO
FBgn0038984	AdipoR	3	NO	NO	NO	NO	NA	NO	68.4378	184.111	4	NO	NO	NO	YES	YES	YES	NO	NO	NO	NO
FBgn0034986	mRpS17	3	NO	NO	NO	NO	NA	NO	12.7957	96.336	4	NO	NO	NO	YES	YES	YES	NA	NO	NA	NO
FBgn0262872	milt	3	NO	NO	NO	NO	NA	NO	10.2967	35.0598	4	NO	NO	NO	YES	YES	YES	NO	NO	NO	NO
FBgn0039776	PH4alphaEFB	3	NO	NO	NO	NO	NA	NO	14.7592	5.59779	4	NO	NO	NO	YES	YES	YES	NO	NO	NO	NO
FBgn0034418	CG15118	3	NO	NO	NO	NO	NA	NO	14.5366	39.4357	4	YES	YES	YES	NO	NO	NO	NO	NO	NO	NO
FBgn0036449	bmm	3	NO	NO	NO	NO	NA	NO	6.6304	23.8812	4	NO	NO	NO	YES	YES	YES	NO	NO	NO	NO
FBgn0037297	CG1116	3	NO	NO	NO	NO	NA	NO	11.825	37.01	4	NO	NA	NO	YES	YES	YES	NO	NO	NO	NO
FBgn0037533	CD98hc	3	NO	NO	NO	NO	NA	NO	35.0944	28.4741	4	YES	YES	YES	NO	NO	NO	NO	NO	NO	NO
FBgn0034727	mRpS29	3	NO	NO	NO	NO	NA	NO	9.95602	25.0494	4	YES	YES	YES	NA	NA	NA	NA	NA	NO	NO
FBgn0264895	RapGAP1	3	NO	NO	NO	NO	NA	NO	4.88287	11.1838	4	NO	NO	NO	YES	YES	YES	NO	NO	NO	NO
FBgn0263601	mib1	3	NO	NO	NO	NO	NA	NO	15.5862	5.57249	4	YES	YES	YES	NO	NO	NO	NO	NO	NO	NO
FBgn0032819	CG10463	3	NO	NO	NO	NO	NA	NO	1.97715	2.45468	2	YES	YES	YES	NA	NA	NA	NO	NO	NO	NO
FBgn0034735	CG4610	3	NO	NO	NO	NO	NA	NO	3.87403	6.58418	4	NO	NO	NO	YES	YES	YES	NA	NA	NO	NO
FBgn0039698	CG7789	3	NO	NO	NO	NO	NA	NO	12.4225	4.46697	4	YES	YES	YES	NO	NO	NO	NO	NO	NO	NO
FBgn0001316	klar	3	NO	NO	NO	NO	SC	YES	7.64306	6.35757	4	YES	YES	YES	NO	NO	NO	NO	NO	NO	NO
FBgn0035308	CG15822	3	NO	NO	NO	NO	NA	NO	1.13666	6.35491	4	NO	NO	NO	YES	YES	YES	NO	NO	NO	NO
FBgn0035798	frac	3	NO	NO	NO	NO	NA	NO	0.643817	0.052206	0	NO	NO	NO	YES	YES	YES	NO	NO	NO	NO
FBgn0287204	Cog8	3	NO	NO	NO	NO	NA	NO	11.3314	4.06504	4	YES	YES	YES	NO	NO	NO	NA	NA	NO	NO
FBgn0263352	Unr	3	NO	NO	NO	NO	NA	NO	17.5878	12.6169	4	NA	NO	NA	YES	YES	YES	NO	NO	NO	NO
FBgn0038964	Nop56	3	NO	NO	NO	NO	NA	NO	12.7912	12.9984	4	NO	NO	NO	YES	YES	YES	NO	NO	NO	NO
FBgn0000289	cg	3	NO	NO	NO	NO	NA	NO	12.4031	15.2986	4	YES	YES	YES	NO	NO	NO	NO	NO	NO	NO
FBgn0000053	Gart	3	NO	NO	NO	NO	NA	NO	11.3034	3.88244	4	YES	NO	NO	YES	YES	NO	NO	NO	NO	NO
FBgn0038679	CG6040	3	NO	NO	NO	NO	EDC	YES	10.3561	5.30299	4	NO	NO	NO	YES	YES	YES	NO	NO	NO	NO
FBgn0262519	Mi-2	3	NO	NO	NO	NO	NA	NO	13.1932	7.44878	4	NO	NO	NO	YES	YES	YES	NO	NO	NA	NO
FBgn0031285	CG3662	3	NO	NO	NO	NO	NA	NO	429.329	226.563	4	NA	NA	NA	YES	YES	YES	NO	NO	NO	NO
FBgn0034223	Tes	3	NO	NO	NO	NO	NA	NO	3.26369	4.04181	4	NO	NO	NO	YES	YES	YES	NO	NO	NA	NO
FBgn0037623	CG9801	3	NO	NO	NO	NO	NA	NO	4.93984	28.9753	4	NO	NO	NO	YES	YES	YES	NO	NO	NO	NO
FBgn0262103	Sik3	3	NO	NO	NO	NO	NA	NO	2.40374	4.53453	4	YES	YES	YES	NO	NO	NO	NO	NO	NO	NO
FBgn0031638	CG11927	3	NO	NO	NO	NO	NA	NO	7.46776	78.3556	4	YES	YES	YES	NO	NO	NO	NO	NO	NO	NO
FBgn0027835	Dp1	3	NO	NO	NO	NO	NA	NO	145.61	11.5028	4	YES	YES	YES	NO	NO	NO	NO	NO	NA	NO
FBgn0040102	lectin-24Db	3	NO	NO	NO	NO	NA	NO	0.11213	2.26069	0	NO	YES	NO	YES	YES	NO	NA	NA	NO	NO
FBgn0031635	tank	3	NO	NO	NO	NO	NA	NO	13.6128	10.0657	4	YES	YES	YES	NO	NO	NO	NO	NO	NO	NO
FBgn0034611	MFS16	3	NO	NO	NO	NO	NA	NO	40.8061	11.775	4	YES	YES	YES	NO	NO	NO	NO	NO	NO	NO
FBgn0032378	CycY	3	NO	NO	NO	NO	NA	NO	6.81625	17.6655	4	NO	NO	NO	YES	YES	YES	NO	NO	NO	NO
FBgn0035142	Hipk	3	NO	NO	NO	YES	NA	NO	5.5244	7.71152	4	NO	NO	NO	YES	YES	YES	NO	NO	NO	NO
FBgn0034051	Mlf	3	NO	NO	NO	NO	NA	NO	24.349	373.701	4	YES	YES	YES	NO	NO	NO	NO	NO	NO	NO
FBgn0032465	Yip1d1	3	NO	NO	NO	NO	NA	NO	44.9565	58.6559	4	NO	NO	NO	YES	YES	YES	NO	NO	NO	NO
FBgn0034230	CG4853	3	NO	NO	NO	NO	NA	NO	7.10791	7.93295	4	YES	YES	YES	NO	NO	NO	NO	NO	NO	NO
FBgn0266452	CTPsyn	3	NO	NO	NO	NO	NA	NO	7.48802	2.87264	4	NO	NO	NO	YES	YES	YES	NO	NO	NO	NO
FBgn0015277	Pi3K59F	3	NO	NO	NO	NO	NA	NO	8.3733	1.00594	4	NO	NO	NO	YES	YES	YES	NO	NO	NO	NO
FBgn0003041	pbl	3	NO	NO	NO	NO	NA	NO	4.58113	9.84997	4	NO	NO	NO	YES	YES	YES	NO	NA	NO	NO
FBgn0035534	mRpS6	3	NO	NO	NO	NO	NA	NO	4.63162	69.0292	2	YES	YES	YES	NO	NO	NO	NO	NO	NO	NO
FBgn0034258	eIF3c	3	NO	NO	NO	NO	NA	NO	207.062	44.5889	4	YES	YES	YES	NO	NO	NO	NO	NO	NO	NO
FBgn0003731	Egfr	3	NO	NO	NO	NO	NA	NO	7.7397	1.0834	4	NO	NO	NO	YES	YES	YES	NO	NO	NO	NO
FBgn0036493	CG7255	3	NO	NO	NO	NO	NA	NO	16.919	2.9764	4	NO	NO	YES	YES	NO	YES	NO	NO	NO	NO
FBgn0004606	zfh1	3	NO	NO	NO	NO	NA	NO	0.151538	2.42035	1	NO	YES	NA	YES	YES	NO	NO	NA	NO	NO
FBgn0044452	Atg2	3	NO	NO	NO	NO	NA	NO	12.7301	4.4533	4	NO	NO	NO	YES	YES	YES	NO	NO	NO	NO
FBgn0035402	Usp5	3	NO	NO	NO	NO	NA	NO	14.1791	16.8145	4	YES	YES	YES	NO	NO	NO	NA	NA	NA	NO
FBgn0036549	CG10516	3	NO	NO	NO	NO	NA	NO	3.65113	20.0801	4	NO	NO	NO	YES	YES	YES	NO	NO	NA	NO
FBgn0027611	LManII	3	NO	NO	NO	NO	NA	NO	6.03112	16.0262	4	NO	NO	NO	YES	YES	YES	NO	NO	NO	NO
FBgn0038586	CG7168	3	NO	NO	NO	NO	NA	NO	3.68482	14.8072	3	NO	NO	NO	YES	YES	YES	NO	NO	NO	NO
FBgn0031652	jet	3	NO	NO	NO	NO	NA	NO	8.62887	3.86533	3	YES	YES	YES	NA	NA	NA	NO	NO	NO	NO
FBgn0027594	drpr	3	NO	NO	NO	NO	NA	NO	14.766	20.8812	4	YES	YES	YES	NO	NO	NO	NO	NO	NO	NO
FBgn0034951	CG3860	3	NO	NO	NO	NO	NA	NO	5.98127	35.8213	4	NO	NO	NO	YES	YES	YES	NO	NO	NO	NO
FBgn0042083	Mccc2	3	NO	NO	NO	NO	NA	NO	2.01312	2.5053	4	YES	YES	YES	NA	NA	NA	NA	NA	NO	NO
FBgn0013563	Pex1	3	NO	NO	NO	NO	NA	NO	2.68829	1.90387	4	NO	NO	NO	YES	YES	YES	NO	NO	NO	NO
FBgn0039668	Trc8	3	NO	NO	NO	NO	NA	NO	27.1534	64.3274	4	NO	NO	NO	YES	YES	YES	NO	NO	NO	NO
FBgn0039562	Gp93	3	NO	YES	NO	YES	NA	YES	793.51	46.5042	4	YES	YES	YES	NO	NO	NO	NO	NO	NO	NO
FBgn0032156	CG13124	3	NO	NO	NO	NO	NA	NO	22.7072	22.1861	4	NO	NO	NO	YES	YES	YES	NO	NO	NO	NO
FBgn0031975	Tg	3	NO	NO	NO	NO	NA	NO	14.5138	1.18062	4	NO	NO	NO	YES	YES	YES	NO	NO	NO	NO
FBgn0036254	CG5645	3	NO	NO	NO	NO	NA	NO	2.31913	10.1338	4	NO	NO	NO	YES	YES	YES	NO	NO	NO	NO
FBgn0265045	Strn-Mlck	3	NO	NO	NO	YES	NA	NO	29.2767	3.27571	4	YES	YES	YES	NO	NO	NO	NO	NO	NO	NO
FBgn0000244	by	3	NO	NO	NO	NO	NA	NO	42.0701	4.714	4	NO	NO	NO	YES	YES	YES	NO	NO	NO	NO
FBgn0031562	CG3604	3	NO	NO	NO	NO	NA	NO	43.0849	0.137398	1	NO	NO	NO	YES	YES	YES	NO	NO	NO	NO
FBgn0039756	CG9743	3	NO	NO	NO	NO	NA	NO	8.09167	11.7243	4	YES	YES	YES	NO	NO	NO	NO	NO	NO	NO
FBgn0039875	sip3	3	NO	NO	NO	NO	NA	NO	40.6643	77.6238	4	YES	YES	YES	NO	NO	NO	NO	NO	NO	NO
FBgn0285963	CG46339	3	NO	NO	NO	NO	NA	NO	9.31476	3.76881	4	YES	YES	YES	NO	NO	NO	NO	NO	NO	NO
FBgn0004795	retn	3	NO	NO	NO	NO	NA	NO	43.8994	5.36473	4	NO	NO	NO	YES	YES	YES	NO	NO	NO	NO
FBgn0045063	fdl	3	NO	NO	NO	NO	NA	NO	6.55327	45.2857	4	YES	YES	YES	NO	NO	NO	NO	NO	NO	NO
FBgn0034158	CG5522	3	NO	NO	NO	NO	NA	NO	1.6776	4.87819	4	NA	NA	NA	YES	YES	YES	NO	NO	NO	NO
FBgn0004868	Gdi	3	NO	NO	NO	NO	NA	NO	150.262	86.0249	4	NO	NO	NO	YES	YES	YES	NO	NO	NO	NO
FBgn0020930	Dgkepsilon	3	NO	NO	NO	NO	NA	NO	20.9097	17.1435	4	NO	NO	NO	YES	YES	YES	NO	NO	NO	NO
FBgn0038312	Zip88E	3	NO	NO	NO	NO	NA	NO	1.75693	2.25665	2	NO	NO	NO	YES	YES	YES	NA	NA	NO	NO
FBgn0015372	RabX1	3	NO	NO	NO	NO	NA	NO	12.8726	19.4505	3	YES	YES	YES	NO	NO	NO	NO	NO	NO	NO
FBgn0086676	spin	3	NO	NO	NO	NO	NA	NO	24.379	20.3731	4	YES	YES	YES	NO	NO	NO	NO	NO	NO	NO
FBgn0003890	betaTub97EF	3	NO	NO	NO	YES	NA	NO	21.4699	7.92558	4	YES	YES	YES	NO	NO	NO	NO	NO	NO	NO
FBgn0034939	thoc5	3	NO	NO	NO	NO	NA	NO	2.90809	10.2041	3	YES	YES	YES	NO	NO	NO	NO	NO	NO	NO
FBgn0034883	Eglp2	3	NO	NO	YES	NO	NA	YES	19.6534	0.534028	0	NO	NO	NO	YES	YES	YES	NO	NO	NO	NO
FBgn0005536	Mbs	3	NO	NO	NO	NO	NA	NO	14.6695	25.4017	4	NO	NO	NO	YES	YES	YES	NO	NO	NO	NO
FBgn0037819	Phyhd1	3	NO	NO	NO	NO	NA	NO	12.8217	7.57488	4	NO	NO	NO	YES	YES	YES	NO	NO	NO	NO
FBgn0033926	Arc1	3	NO	NO	NO	YES	NA	NO	118.154	100.363	4	YES	YES	YES	NO	NO	NO	NA	NA	NO	NO
FBgn0032451	spict	3	NO	NO	NO	NO	NA	NO	21.8489	9.56299	4	NA	NA	NA	YES	YES	YES	NA	NA	NA	NO
FBgn0086443	AsnRS	3	NO	NO	NO	NO	NA	NO	28.1159	11.3815	4	NO	NO	NO	YES	YES	YES	NO	NO	NO	NO
FBgn0034438	CG9416	3	NO	NO	NO	NO	NA	NO	8.40099	4.3772	4	YES	YES	YES	NO	NO	NO	NO	NO	NO	NO
FBgn0010520	Bka	3	NO	NO	NO	NO	NA	NO	6.46978	10.3398	2	NO	NO	NO	YES	YES	YES	NO	NO	NO	NO
FBgn0033352	PAN2	3	NO	NO	NO	NO	NA	NO	12.1831	6.11418	4	YES	YES	YES	NO	NO	NO	NA	NA	NO	NO
FBgn0033366	Ance-4	3	NO	NO	NO	NO	NA	NO	0.268332	0.043297	0	NO	NO	NO	YES	YES	YES	NA	NA	NO	NO
FBgn0010877	l(3)05822	3	NO	NO	NO	NO	NA	NO	10.8868	22.6373	4	NO	NO	NO	YES	YES	YES	NO	NO	NO	NO
FBgn0035802	Pura	3	NO	NO	NO	NO	NA	NO	6.72307	8.664	4	NO	NO	NO	YES	YES	YES	NO	NO	NO	NO
FBgn0054056	CG34056	3	NO	NO	NO	NO	NA	NO	22.0698	1.99798	4	YES	YES	YES	NO	NO	NO	NO	NO	NO	NO
FBgn0033762	ZnT49B	3	NO	NO	NO	NO	NA	NO	5.4382	17.3707	4	NO	NO	NO	YES	YES	YES	NA	NA	NO	NO
FBgn0026181	Rok	3	NO	NO	NO	YES	NA	NO	9.5192	5.08615	4	NO	NO	NO	YES	YES	YES	NO	NO	NO	NO
FBgn0033875	CG6357	3	NO	YES	NO	NO	NA	YES	29.2105	151.751	4	YES	YES	YES	NO	NO	NO	NO	NO	NO	NO
FBgn0015737	Hmu	3	NO	NO	NO	NO	NA	NO	64.3394	22.087	4	YES	YES	YES	NO	NO	NO	NO	NO	NO	NO
FBgn0263289	scrib	3	NO	NO	NO	NO	NA	NO	51.2213	7.81464	4	YES	YES	YES	NO	NO	NO	NO	NO	NO	NO
FBgn0035253	Srrm234	3	NO	NO	NO	NO	NA	NO	13.4528	6.56434	4	NO	NO	NO	YES	YES	YES	NO	NO	NA	NO
FBgn0028496	CG30116	3	NO	NO	NO	NO	NA	NO	6.01016	3.5221	4	NO	NO	YES	YES	NO	YES	NO	NO	NO	NO
FBgn0028543	NimB2	3	NO	NO	NO	NO	NA	NO	1.63793	5.67734	4	YES	YES	YES	NO	NO	NO	NO	NO	NO	NO
FBgn0013718	nuf	3	NO	NO	NO	NO	NA	NO	16.3343	19.5122	4	YES	YES	YES	NO	NO	NO	NO	NO	NO	NO
FBgn0033760	CG8785	3	NO	NO	NO	NO	NA	NO	4.34113	2.03821	1	NO	NO	NO	YES	YES	YES	NO	NO	NO	NO
FBgn0032036	CG13384	3	NO	NO	NO	NO	NA	NO	7.05521	10.4072	4	NO	NO	NO	YES	YES	YES	NO	NO	NO	NO
FBgn0260940	lsn	3	NO	NO	NO	NO	NA	NO	11.3768	13.0736	4	YES	YES	YES	NO	NO	NO	NO	NO	NO	NO
FBgn0033350	CG8237	3	NO	NO	NO	NO	NA	NO	59.7961	82.8778	4	YES	YES	YES	NA	NA	NA	NA	NA	NO	NO
FBgn0061492	loj	3	NO	NO	YES	NO	NA	YES	52.3822	14.5905	4	NO	NO	NO	YES	YES	YES	NO	NO	NO	NO
FBgn0028970	RabGGTb	3	NO	NO	NO	NO	NA	NO	9.95886	7.4751	4	YES	YES	YES	NO	NO	NO	NO	NO	NO	NO
FBgn0032596	Prosbeta4	3	NO	NO	NO	YES	NA	NO	39.2752	70.2428	4	NA	NA	NA	YES	YES	YES	NO	NO	NA	NO
FBgn0262733	Src64B	3	NO	NO	NO	NO	NA	NO	6.72916	6.12307	4	NO	NO	NO	YES	YES	YES	NO	NO	NO	NO
FBgn0011232	scat	3	NO	NO	NO	NO	NA	NO	12.8397	4.56947	4	NO	NO	NO	YES	YES	YES	NO	NO	NO	NO
FBgn0261119	Prp19	3	NO	NO	NO	NO	NA	NO	9.25317	8.71038	4	YES	YES	YES	NO	NO	NO	NA	NA	NO	NO
FBgn0038197	foxo	3	NO	NO	NO	NO	NA	NO	23.049	2.95168	4	NO	NO	NO	YES	YES	YES	NO	NO	NO	NO
FBgn0015618	Cdk8	3	NO	NO	NO	NO	NA	NO	2.34545	2.48807	1	NO	NO	NO	YES	YES	YES	NO	NO	NO	NO
FBgn0028538	Sec71	3	NO	NO	NO	NO	NA	NO	15.3874	17.8306	4	NA	NA	NA	YES	YES	YES	NO	NO	NO	NO
FBgn0029506	Tsp42Ee	3	NO	NO	NO	YES	NA	NO	145.596	101.443	4	NO	NO	NO	YES	YES	YES	NO	NO	NO	NO
FBgn0036451	Helz	3	NO	NO	NO	NO	NA	NO	13.3002	6.78	4	NA	NO	NA	YES	YES	YES	NO	NO	NO	NO
FBgn0020388	Gcn5	3	NO	NO	NO	NO	NA	NO	7.01265	5.31786	4	YES	YES	YES	NO	NO	NO	NO	NO	NO	NO
FBgn0035989	Atat	3	NO	NO	NO	NO	NA	NO	6.76472	194.844	4	NO	NO	NO	YES	YES	YES	NO	NO	NO	NO
FBgn0022160	Gpo1	3	NO	NO	NO	YES	NA	NO	12.7544	4.65615	4	NO	NO	NO	YES	YES	YES	NO	NO	NO	NO
FBgn0034063	CG8389	3	NO	NO	NO	NO	NA	NO	2.0495	11.1777	4	YES	YES	YES	NO	NO	NO	NA	NA	NO	NO
FBgn0034985	CG3328	3	NO	NO	NO	NO	NA	NO	1.56588	8.11959	4	NO	YES	NO	NO	YES	YES	NO	NA	NA	NO
FBgn0039348	Npl4	3	NO	NO	NO	NO	NA	NO	19.2481	96.1542	4	YES	YES	YES	NA	NA	NA	NO	NO	NO	NO
FBgn0037838	TTLL15	3	NO	NO	NO	NO	NA	NO	0.284479	6.51243	4	NO	NO	NO	YES	YES	YES	NO	NO	NO	YES
FBgn0036448	mop	3	NO	NO	NO	NO	NA	NO	11.3249	10.3626	4	NO	NO	NO	YES	YES	YES	NO	NO	NO	NO
FBgn0034176	ste24a	3	NO	NO	NO	NO	NA	NO	20.7807	99.8439	4	NO	NO	NO	YES	YES	YES	NO	NO	NO	NO
FBgn0034400	CG15099	3	NO	NO	NO	NO	NA	NO	9.57657	6.40454	4	YES	YES	YES	NO	NO	NO	NO	NO	NO	NO
FBgn0086358	Tab2	3	NO	NO	NO	NO	NA	NO	8.75317	9.31268	4	YES	YES	YES	NO	NO	NO	NO	NO	NA	NO
FBgn0027655	htt	3	NO	NO	NO	NO	NA	NO	6.61752	1.8159	4	NO	NO	NO	YES	YES	YES	NO	NO	NO	NO
FBgn0039508	CG3368	3	NO	NO	NO	NO	NA	NO	4.71997	2.81009	4	YES	YES	YES	NO	NO	NO	NO	NO	NO	NO
FBgn0039602	CG1647	3	NO	NO	NO	NO	NA	NO	4.87411	5.0264	3	NO	NO	NO	YES	YES	YES	NO	NO	NO	NO
FBgn0035392	CG1271	3	NO	NO	NO	NO	NA	NO	1.86547	5.63058	1	NO	NO	NO	YES	YES	YES	NO	NO	NO	NO
FBgn0001250	if	3	NO	NO	NO	YES	NA	NO	6.77714	3.04053	4	NO	NO	NO	YES	YES	YES	NO	NO	NO	NO
FBgn0038488	m-cup	3	NO	NO	NO	NO	NA	NO	2.7427	140.452	4	YES	YES	YES	NO	NO	NO	NO	NO	NO	NO
FBgn0037719	bocks	3	NO	NO	NO	NO	NA	NO	6.55239	16.1588	4	NO	NO	NO	YES	YES	YES	NO	NO	NO	NO
FBgn0035375	Pgant6	3	NO	NO	NO	NO	NA	NO	18.8164	10.2612	4	NO	NO	NO	YES	YES	YES	NO	NO	NA	NO
FBgn0034814	CG9890	3	NO	NO	NO	NO	NA	NO	3.09754	4.56078	4	NO	NO	NO	YES	YES	YES	NO	NO	NO	NO
FBgn0037720	CG8312	3	NO	NO	NO	NO	EDC	YES	23.7976	19.1213	4	NO	NO	NO	YES	YES	YES	NO	NO	NO	NO
FBgn0036018	CG3335	3	NO	NO	NO	NO	NA	NO	6.57893	3.91616	3	NO	NO	NO	YES	YES	YES	NO	NO	NO	NO
FBgn0032815	CG10462	3	NO	NO	NO	NO	NA	NO	7.04791	5.05573	4	YES	YES	YES	NA	NA	NA	NO	NO	NO	NO
FBgn0039293	Alg9	3	NO	NO	NO	NO	NA	NO	7.59454	3.89014	4	YES	YES	YES	NA	NA	NA	NO	NO	NO	NO
FBgn0016696	Pitslre	3	NO	NO	NO	NO	NA	NO	20.8084	7.26563	4	YES	YES	YES	NO	NO	NO	NO	NO	NO	NO
FBgn0250786	Chd1	3	NO	NO	NO	NO	NA	NO	7.93886	9.70573	4	YES	YES	YES	NO	NO	NO	NA	NA	NO	NO
FBgn0034433	EndoB	3	NO	NO	NO	NO	NA	NO	1.17149	5.17573	2	NO	NO	NO	YES	YES	YES	NO	NO	NO	NO
FBgn0034988	cN-IIIB	3	NO	NO	NO	NO	NA	NO	3.74205	2.86136	2	NO	NO	NO	YES	YES	YES	NO	NO	NO	NO
FBgn0016059	Sema1b	3	NO	NO	NO	NO	NA	NO	9.97687	28.1992	4	YES	YES	YES	NO	NO	NO	NO	NO	NO	NO
FBgn0029118	ScsbetaG	3	NO	NO	NO	NO	NA	NO	6.68224	21.9115	3	YES	YES	YES	NO	NO	NO	NO	NO	NO	NO
FBgn0036124	CG7839	3	NO	NO	NO	NO	NA	NO	7.08125	3.87296	3	NO	NO	NO	YES	YES	YES	NO	NO	NO	NO
FBgn0028983	Spn55B	3	NO	NO	NO	NO	NA	NO	32.1121	5.06112	4	YES	YES	YES	NO	NO	NO	NO	NO	NA	NO
FBgn0039767	CG2218	3	NO	NO	NO	NO	NA	NO	10.9068	13.7032	4	NA	NA	NA	YES	YES	YES	NA	NA	NO	NO
FBgn0263930	dally	3	NO	NO	NO	NO	NA	NO	2.1536	5.15584	4	NO	NO	NO	YES	YES	YES	NO	NO	NO	NO
FBgn0026309	aft	3	NO	NO	NO	NO	NA	NO	2.1172	27.3075	4	YES	YES	YES	NO	NO	NO	NO	NO	NO	NO
FBgn0037796	CG12814	3	NO	NO	NO	NO	NA	NO	6.55837	23.0488	4	YES	YES	YES	NO	NO	NO	NO	NO	NO	NO
FBgn0010894	sinu	3	NO	NO	NO	NO	NA	NO	8.7987	12.2174	4	YES	YES	YES	NO	NO	NO	NO	NO	NA	NO
FBgn0038922	Idh3b	3	NO	NO	NO	YES	NA	NO	25.1489	204.463	4	NO	NO	NO	YES	YES	YES	NO	NO	NO	NO
FBgn0036814	CG14073	3	NO	NO	NO	NO	NA	NO	4.31902	10.8116	4	NO	NO	NO	YES	YES	YES	NO	NO	NO	NO
FBgn0033236	CG14764	3	NO	NO	NO	NO	NA	NO	13.6057	9.12033	4	NO	NO	NO	YES	YES	YES	NO	NO	NO	NO
FBgn0261710	nocte	3	NO	NO	NO	NO	NA	NO	25.3851	3.71324	4	NA	NA	NA	YES	YES	YES	NA	NA	NO	NO
FBgn0031314	IntS14	3	NO	NO	NO	NO	NA	NO	5.1079	3.98466	3	NO	NO	NO	YES	YES	YES	NA	NA	NO	NO
FBgn0035588	Dhrs4	3	NO	NO	NO	NO	NA	NO	12.2314	8.10361	4	NO	NO	NO	YES	YES	YES	NO	NO	NO	NO
FBgn0051436	CG31436	3	NO	NO	NO	NO	NA	NO	1.72669	0.67451	4	YES	YES	YES	NA	NA	NA	NO	NO	NO	NO
FBgn0035247	Mettl2	3	NO	NO	NO	NO	NA	NO	4.86697	12.5708	4	NO	NO	NO	YES	YES	YES	NO	NO	NO	NO
FBgn0021906	RFeSP	3	NO	NO	NO	YES	NA	NO	125.095	292.381	4	YES	YES	YES	NO	NO	NO	NO	NO	NO	NO
FBgn0032330	Samuel	3	NO	NO	NO	NO	SC	YES	7.18425	4.24352	4	NO	NO	NO	YES	YES	YES	NO	NO	NO	NO
FBgn0034084	CG8435	3	NO	NO	NO	NO	NA	NO	3.7471	15.985	4	NO	NO	NO	YES	YES	YES	NO	NO	NO	NO
FBgn0261268	Cul3	3	NO	NO	NO	NO	NA	NO	11.1654	301.942	4	YES	YES	YES	NA	NA	NA	NO	NO	NO	NO
FBgn0263395	hppy	3	NO	NO	NO	NO	NA	NO	5.77958	13.503	4	YES	YES	NO	NO	NO	YES	NO	NO	NO	NO
FBgn0035907	GstO1	3	NO	NO	NO	NO	NA	NO	5.24179	108.261	4	NA	NA	NA	YES	YES	YES	NO	NO	NA	NO
FBgn0031497	SerRS	3	NO	NO	NO	NO	NA	NO	52.6023	12.6837	4	YES	YES	YES	NO	NO	NO	NO	NO	NO	NO
FBgn0031590	CG3702	3	NO	NO	NO	NO	NA	NO	21.051	169.78	4	YES	YES	YES	NO	NO	NO	NO	NO	NO	NO
FBgn0035690	CG10274	3	NO	NO	NO	NO	NA	NO	6.13862	1.1585	4	NO	NO	NO	YES	YES	YES	NO	NO	NO	NO
FBgn0261862	whd	3	NO	NO	NO	NO	NA	NO	29.3198	2.66653	4	YES	YES	YES	NA	NA	NA	NO	NO	NO	NO
FBgn0034141	CG8311	3	NO	NO	NO	NO	NA	NO	5.07158	4.56758	4	NA	NA	NA	YES	YES	YES	NO	NO	NO	NO
FBgn0028434	Ercc1	3	NO	NO	NO	NO	NA	NO	1.19088	5.46319	2	NO	NO	NO	YES	YES	YES	NA	NA	NA	NO
FBgn0034275	CG5002	3	NO	NO	NO	NO	NA	NO	0.981071	9.02185	3	YES	YES	YES	NO	NO	NO	NO	NO	NO	NO
FBgn0035827	Srp9	3	NO	NO	NO	NO	NA	NO	17.5176	35.3522	4	YES	YES	YES	NA	NA	NA	NA	NA	NO	NO
FBgn0034422	CG7137	3	NO	NO	NO	NO	NA	NO	5.60409	41.1886	4	YES	YES	YES	NO	NO	NO	NO	NO	NO	NO
FBgn0027094	AlaRS	3	NO	NO	NO	NO	NA	NO	17.906	15.6743	4	NO	NO	NO	YES	YES	YES	NO	NO	NO	NO
FBgn0003862	trx	3	NO	YES	NO	NO	NA	YES	4.39764	1.875	4	NO	NO	NO	YES	YES	YES	NO	NO	NO	NO
FBgn0020412	JIL-1	3	NO	NO	NO	NO	NA	NO	9.18483	27.6518	4	NO	NO	NO	YES	YES	YES	NO	NO	NO	NO
FBgn0015221	Fer2LCH	3	NO	NO	NO	YES	NA	NO	216.969	507.415	4	NO	NO	NO	YES	YES	YES	NO	NO	NO	NO
FBgn0035390	scramb2	3	NO	NO	YES	NO	NA	YES	12.9386	20.9094	4	NO	NO	NO	YES	YES	YES	NO	NO	NO	NO
FBgn0038752	CG4462	3	NO	NO	NO	NO	NA	NO	0	7.22953	1	NO	NO	NO	YES	YES	YES	NO	NO	NO	NO
FBgn0039600	Prp39	3	NO	NO	NO	NO	NA	NO	15.7807	12.38	4	NO	NO	NO	YES	YES	YES	NO	NO	NO	NO
FBgn0010015	CanA1	3	NO	NO	NO	NO	NA	NO	1.58248	0.289139	1	NO	YES	NA	YES	YES	NO	NO	NO	NO	NO
FBgn0038424	Fntb	2	NO	NO	NO	NO	NA	NO	5.12184	29.5423	4	YES	YES	NO	NA	NA	NA	NA	NA	NA	NO
FBgn0035283	CG12024	2	NO	NO	NO	NO	NA	NO	8.066	24.3638	4	YES	YES	NO	NO	NO	NO	NO	NO	NA	NO
FBgn0010825	Gug	2	NO	NO	NO	NO	SC	YES	4.44986	5.69551	4	NO	NO	NO	NO	YES	YES	NO	NO	NO	NO
FBgn0003310	S	2	NO	NO	NO	NO	NA	NO	6.00306	16.5345	4	NO	YES	YES	NO	NO	NO	NO	NO	NO	NO
FBgn0038826	Syp	2	NO	NO	NO	YES	NA	NO	32.513	424.927	4	NO	NO	NO	NO	YES	YES	NO	NO	NO	NO
FBgn0263605	l(3)72Dn	2	NO	NO	NO	NO	NA	NO	2.24915	2.27319	3	YES	YES	NO	NO	NO	NO	NO	NO	NO	NO
FBgn0034853	Ice1	2	NO	NO	NO	NO	NA	NO	1.0013	4.85593	3	YES	YES	NO	NO	NO	NO	NO	NO	NO	NO
FBgn0039682	Obp99c	2	NO	NO	NO	YES	NA	NO	10.3625	30.2861	4	NO	NO	NO	NO	NO	NO	YES	YES	NA	NO
FBgn0034200	Gbp2	2	NO	NO	NO	NO	NA	NO	3.70022	17.6445	4	YES	YES	NO	NO	NO	NO	NO	NO	NO	NO
FBgn0026239	gukh	2	NO	NO	NO	NO	NA	NO	2.74087	7.77858	4	NO	NO	NO	YES	NO	YES	NA	NO	NO	NO
FBgn0010220	Dbp45A	2	NO	NO	NO	NO	NA	NO	10.2288	8.72238	4	NO	NO	NO	NO	YES	YES	NA	NA	NO	NO
FBgn0003391	shg	2	NO	NO	NO	NO	NA	NO	3.50433	6.80466	4	YES	YES	NO	NA	NA	NA	NO	NO	NO	NO
FBgn0039203	CG13618	2	NO	NO	NO	NO	NA	NO	0.280379	0.382711	0	YES	YES	NO	NA	NA	NA	NO	NO	NO	NO
FBgn0038890	sp3	2	NO	NO	NO	NO	NA	NO	4.98966	8.60861	4	NO	NO	NO	NO	YES	YES	NO	NO	NO	NO
FBgn0020278	loco	2	NO	NO	NO	NO	NA	NO	19.4049	7.54012	4	NO	NO	NO	YES	YES	NO	NO	NO	NO	NO
FBgn0267823	Gmer	2	NO	NO	NO	NO	NA	NO	6.3472	15.7834	4	YES	NO	YES	NA	NA	NA	NA	NA	NO	NO
FBgn0285955	cv-c	2	NO	NO	NO	NO	NA	NO	2.34529	4.23413	4	YES	YES	NO	NO	NO	NO	NO	NO	NO	NO
FBgn0035060	Eps-15	2	NO	NO	NO	NO	NA	NO	6.96098	40.5226	4	YES	YES	NO	NO	NO	NO	NO	NO	NO	NO
FBgn0036842	Ugt316A1	2	NO	NO	NO	NO	NA	NO	6.87164	4.4139	4	YES	YES	NO	NO	NO	NO	NO	NO	NO	NO
FBgn0026432	Grip163	2	NO	NO	NO	NO	NA	NO	0.618477	3.21548	2	NO	NO	NA	NO	YES	YES	NA	NA	NA	NO
FBgn0034490	CG9864	2	NO	NO	NO	NO	NA	NO	16.6741	2.47121	1	NO	YES	YES	NO	NO	NO	NO	NO	NO	NO
FBgn0037442	gzl	2	NO	NO	NO	NO	NA	NO	18.5151	45.31	4	NO	YES	YES	NO	NO	NO	NO	NO	NO	NO
FBgn0262619	DNAlig1	2	NO	NO	NO	NO	NA	NO	0.813533	4.04899	1	NA	NA	NA	YES	YES	NO	NA	NA	NA	NO
FBgn0086371	poly	2	NO	NO	NO	NO	NA	NO	46.9947	87.1744	4	NO	NO	NO	NO	YES	YES	NO	NO	NO	NO
FBgn0032136	Apoltp	2	NO	NO	NO	NO	NA	NO	0.12477	6.52385	4	NO	NO	NO	YES	NO	YES	NO	NO	NO	YES
FBgn0261673	nemy	2	NO	NO	NO	NO	NA	NO	4.28279	78.6455	4	NO	NO	NO	YES	YES	NO	NA	NA	NO	NO
FBgn0029147	NtR	2	NO	NO	NO	NO	NA	NO	0.614258	3.33984	1	YES	YES	NO	NO	NO	NO	NO	NO	NO	NO
FBgn0261279	lqfR	2	NO	NO	NO	NO	NA	NO	17.6042	49.1946	4	NO	NO	NO	YES	NO	YES	NO	NO	NO	NO
FBgn0033738	DUBAI	2	NO	NO	NO	NO	NA	NO	6.97335	64.2941	4	NO	NO	NO	NO	YES	YES	NO	NO	NO	NO
FBgn0035148	CG3402	2	NO	NO	NO	NO	NA	NO	5.24996	10.3384	3	NO	NO	NO	NO	YES	YES	NO	NO	NO	NO
FBgn0050195	CG30195	2	NO	NO	NO	NO	NA	NO	3.70359	2.12273	2	NO	YES	NO	NO	YES	NO	NO	NO	NO	NO
FBgn0010238	Lac	2	NO	NO	YES	NO	NA	YES	37.3142	62.1461	4	NO	NO	NO	NO	YES	YES	NO	NO	NO	NO
FBgn0262508	CG43078	2	NO	NO	NO	NO	NA	NO	7.68435	1.3165	4	NO	NO	NO	YES	YES	NO	NO	NO	NO	NO
FBgn0027580	PCB	2	NO	NO	NO	YES	NA	NO	11.4941	27.2816	4	YES	YES	NO	NO	NO	NO	NO	NO	NO	NO
FBgn0262579	Sarm	2	NO	NO	NO	NO	NA	NO	22.3306	15.5079	4	NO	NO	NO	YES	YES	NO	NO	NO	NO	NO
FBgn0261800	LanB1	2	NO	NO	NO	YES	NA	NO	15.4202	6.68154	4	NO	NO	NO	YES	YES	NO	NO	NO	NO	NO
FBgn0036663	CG9674	2	NO	NO	NO	YES	NA	NO	61.5615	10.6459	4	NO	NO	NO	NO	YES	YES	NO	NO	NO	NO
FBgn0033949	Had2	2	NO	NO	NO	NO	NA	NO	0.108664	0.319288	0	NO	NO	NA	YES	YES	NO	NO	NO	NO	NO
FBgn0038250	CG3505	2	NO	NO	NO	NO	NA	NO	35.2247	2.60558	4	NO	NO	NO	YES	YES	NO	NO	NO	NO	NO
FBgn0283472	S6k	2	NO	NO	NO	NO	NA	NO	10.0917	6.19445	4	YES	YES	NO	NO	NO	NO	NO	NO	NO	NO
FBgn0052438	SMC5	2	NO	NO	NO	NO	NA	NO	0.591458	29.8467	3	YES	YES	NO	NA	NA	NA	NO	NO	NA	NO
FBgn0002887	mus201	2	NO	NO	NO	NO	NA	NO	0.766347	6.03923	3	NO	NO	NO	YES	NO	YES	NO	NO	NO	NO
FBgn0000422	Ddc	2	NO	NO	NO	NO	NA	NO	0.169601	8.50864	4	NO	NO	NO	NO	YES	YES	NO	NO	NO	NO
FBgn0028530	mTTF	2	NO	NO	NO	NO	NA	NO	2.58815	6.17585	4	NO	NO	NO	NO	YES	YES	NA	NA	NO	NO
FBgn0263106	DnaJ-1	2	NO	NO	NO	NO	NA	NO	155.248	146.795	4	NO	NO	NO	YES	YES	NO	NO	NO	NO	NO
FBgn0259481	Mob2	2	NO	NO	NO	NO	NA	NO	11.1222	20.4675	4	NO	NO	NO	NO	YES	YES	NO	NO	NO	NO
FBgn0263110	CG43367	2	NO	NO	NO	NO	NA	NO	3.10402	2.3277	4	YES	NO	NO	YES	NO	NO	NO	NO	NO	NO
FBgn0259937	Nop60B	2	NO	NO	NO	NO	NA	NO	21.1269	11.3409	4	NO	NO	NO	YES	YES	NO	NO	NO	NA	NO
FBgn0036579	CG5027	2	NO	NO	NO	NO	NA	NO	6.71894	10.8391	4	NO	YES	YES	NO	NO	NO	NO	NO	NO	NO
FBgn0015035	Cyp4e3	2	NO	NO	NO	NO	NA	NO	61.8325	0.729361	0	NA	NA	NA	YES	NO	YES	NO	NO	NO	NO
FBgn0020306	dom	2	NO	NO	NO	NO	NA	NO	11.9293	7.58042	4	NO	NO	NO	YES	NO	YES	NO	NO	NO	NO
FBgn0033814	Qsox1	2	NO	NO	NO	NO	NA	NO	160.308	90.0611	4	YES	YES	NO	NO	NO	NO	NO	NO	NO	NO
FBgn0026562	SPARC	2	NO	NO	NO	NO	NA	NO	91.4915	37.5883	4	NO	NO	NO	NA	NA	NA	YES	YES	NO	NO
FBgn0051233	CG31233	2	NO	NO	NO	NO	NA	NO	0	1.30722	1	NA	NA	NA	NO	YES	YES	NA	NA	NO	NO
FBgn0003292	rt	2	NO	NO	NO	NO	NA	NO	0.068717	0.959738	0	NA	NA	NA	YES	YES	NO	NA	NA	NA	NO
FBgn0032775	CG17544	2	NO	NO	NO	NO	NA	NO	16.0774	14.3864	4	NA	NA	NA	NO	YES	YES	NO	NO	NO	NO
FBgn0015477	Rme-8	2	NO	NO	NO	NO	NA	NO	5.95551	6.2684	4	NO	NO	NO	YES	NO	YES	NO	NO	NO	NO
FBgn0267351	Topors	2	NO	NO	NO	NO	NA	NO	1.77513	12.5847	4	YES	YES	NO	NO	NO	NO	NO	NO	NO	NO
FBgn0002643	mam	2	NO	NO	NO	NO	SC	YES	3.73497	5.78054	4	YES	YES	NO	NO	NO	NO	NO	NO	NO	NO
FBgn0034307	CG10914	2	NO	NO	NO	NO	NA	NO	0.646664	4.47596	1	YES	YES	NO	NO	NO	NO	NO	NO	NO	NO
FBgn0027503	CG11970	2	NO	NO	NO	YES	NA	NO	1.64394	3.11055	4	YES	YES	NO	NO	NO	NO	NA	NA	NA	NO
FBgn0050389	CG30389	2	NO	NO	NO	YES	NA	NO	7.09932	15.5577	4	YES	YES	NO	NO	NO	NO	NO	NO	NO	NO
FBgn0004926	eIF2beta	2	NO	NO	NO	NO	NA	NO	97.4552	171.01	4	YES	YES	NO	NO	NO	NO	NO	NO	NO	NO
FBgn0034761	CG4250	2	NO	NO	NO	NO	NA	NO	2.10523	25.0699	0	NO	NO	NO	NO	NO	NO	YES	YES	NO	NO
FBgn0032026	CG7627	2	NO	NO	NO	NO	NA	NO	1.92678	2.03217	4	YES	YES	NO	NO	NO	NO	NO	NO	NO	NO
FBgn0035574	RhoGEF64C	2	NO	NO	NO	NO	NA	NO	5.36726	0.70363	0	NA	YES	NA	NO	YES	NO	NO	NO	NO	NO
FBgn0011693	Pdh	2	NO	NO	NO	NO	NA	NO	2.00138	4.27181	4	NO	YES	YES	NO	NO	NO	NO	NO	NO	NO
FBgn0031745	rau	2	NO	NO	NO	NO	NA	NO	5.62013	3.7176	4	NO	YES	YES	NO	NO	NO	NO	NO	NO	NO
FBgn0034009	CG8155	2	NO	NO	NO	NO	NA	NO	2.30567	12.389	4	YES	YES	NO	NO	NO	NO	NO	NO	NO	NO
FBgn0037592	CG11737	2	NO	NO	NO	NO	NA	NO	7.33421	21.4542	4	YES	NO	YES	NO	NO	NO	NO	NO	NO	NO
FBgn0034975	enok	2	NO	NO	NO	NO	NA	NO	4.49589	3.34109	4	YES	NO	YES	NO	NO	NO	NO	NO	NO	NO
FBgn0005695	gcl	2	NO	NO	NO	NO	NA	NO	4.03804	3.94871	4	NO	NO	NO	YES	YES	NO	NO	NO	NO	NO
FBgn0085370	Pde11	2	NO	NO	NO	NO	NA	NO	9.31185	5.53479	4	NO	NO	NO	NO	YES	YES	NO	NO	NO	NO
FBgn0050431	CG30431	2	NO	NO	NO	NO	NA	NO	0.360838	30.3853	4	YES	YES	NO	NA	NA	NA	NA	NA	NO	YES
FBgn0034717	CG5819	2	NO	NO	NO	NO	NA	NO	0.05157	1.36135	0	NO	NO	NO	YES	NO	YES	NO	NO	NO	NO
FBgn0046296	DEF8	2	NO	NO	NO	NO	NA	NO	5.92061	3.71756	4	NO	NO	NO	YES	NO	YES	NA	NA	NA	NO
FBgn0029167	Hml	2	NO	NO	NO	NO	NA	NO	0.421785	1.62254	3	NO	YES	NO	NO	YES	NO	NO	NA	NA	NO
FBgn0032773	fon	2	NO	NO	NO	NO	NA	NO	1.65751	9.78416	4	NO	NO	NO	YES	NO	YES	NO	NO	NO	NO
FBgn0035591	CG4611	2	NO	NO	NO	NO	NA	NO	1.76971	10.9108	3	YES	YES	NO	NO	NO	NO	NA	NA	NO	NO
FBgn0034479	CG8654	2	NO	NO	NO	YES	NA	NO	35.7713	45.2449	4	YES	YES	NO	NO	NO	NO	NO	NO	NO	NO
FBgn0036812	Nufip	2	NO	NO	NO	NO	NA	NO	0.844093	3.68942	0	NO	NO	NO	YES	NO	YES	NO	NO	NO	NO
FBgn0267390	dop	2	NO	NO	NO	NO	NA	NO	7.93793	9.80674	4	NO	NO	NO	YES	NO	YES	NA	NA	NO	NO
FBgn0040283	SMC1	2	NO	NO	NO	NO	NA	NO	8.36379	5.62049	4	YES	YES	NO	NO	NO	NO	NO	NO	NO	NO
FBgn0261456	hpo	2	NO	NO	NO	NO	NA	NO	4.52478	9.30754	4	YES	YES	NO	NO	NO	NO	NO	NO	NO	NO
FBgn0034253	CG10936	2	NO	NO	NO	NO	NA	NO	0.184252	2.01282	0	NA	NO	NA	NA	YES	YES	NO	NO	NO	NO
FBgn0002901	mus304	2	NO	NO	NO	NO	NA	NO	1.1562	4.81141	2	NO	NO	NO	YES	NO	YES	NO	NO	NA	NO
FBgn0039590	CG10011	2	NO	NO	NO	YES	NA	NO	3.63898	2.5249	4	NO	NO	NO	NO	YES	YES	NO	NO	NO	NO
FBgn0033315	beta3GalTII	2	NO	NO	NO	NO	NA	NO	3.99852	5.58371	3	NO	NO	NO	NO	YES	YES	NO	NO	NO	NO
FBgn0035589	CHMP2B	2	NO	NO	NO	NO	NA	NO	18.199	81.4459	4	NO	NO	NO	YES	YES	NO	NO	NO	NO	NO
FBgn0004889	tws	2	NO	NO	NO	NO	SC	YES	9.49824	39.6057	4	YES	YES	NO	NO	NO	NO	NO	NO	NO	NO
FBgn0034182	SmydA-7	2	NO	NO	NO	NO	NA	NO	0.955451	0.65049	4	NO	NO	NO	NO	YES	YES	NO	NO	NO	NO
FBgn0033742	Nepl10	2	NO	NO	NO	NO	NA	NO	0.0542	0.345547	0	NO	NO	NA	YES	NO	YES	NO	NO	NO	NO
FBgn0032536	Ance-3	2	NO	NO	NO	NO	NA	NO	0.395303	0.269079	0	YES	NO	YES	NO	NO	NO	NO	NO	NO	NO
FBgn0015295	Shark	2	NO	NO	NO	NO	NA	NO	3.83352	1.8298	4	NO	NO	NO	NO	YES	YES	NO	NO	NO	NO
FBgn0036208	CG10361	2	NO	NO	NO	NO	NA	NO	0.354835	0.479593	2	YES	YES	NO	NO	NO	NO	NO	NO	NO	NO
FBgn0034734	CG4554	2	NO	NO	NO	YES	NA	NO	1.84251	0.761645	4	NO	NO	NO	YES	NO	YES	NO	NO	NO	NO
FBgn0038072	CG6225	2	NO	NO	NO	NO	NA	NO	2.30018	6.28965	4	YES	YES	NA	NO	NO	NO	NO	NO	NO	NO
FBgn0041582	tamo	2	NO	NO	NO	NO	NA	NO	9.99695	22.1788	4	NO	NO	NO	NO	YES	YES	NO	NO	NO	NO
FBgn0064237	Idgf5	2	NO	NO	NO	NO	NA	NO	0.727481	0.804415	3	YES	YES	NO	NO	NO	NO	NO	NO	NO	NO
FBgn0040322	GNBP2	2	NO	NO	NO	NO	NA	NO	0.748684	1.17074	3	YES	YES	NO	NO	NO	NO	NO	NO	NO	NO
FBgn0036043	Ae2	2	NO	NO	NO	NO	EDC	YES	30.0974	9.57316	4	NA	NO	NO	NO	YES	YES	NO	NO	NO	NO
FBgn0000490	dpp	2	NO	NO	NO	NO	NA	NO	6.44503	12.7517	4	NO	NO	NA	YES	YES	NO	NO	NO	NA	NO
FBgn0038256	CG7530	2	NO	NO	NO	NO	NA	NO	5.7333	13.3451	4	NO	NO	NO	YES	NO	YES	NO	NO	NO	NO
FBgn0040271	Sulf1	2	NO	NO	NO	NO	NA	NO	4.71515	16.9955	4	YES	YES	NO	NO	NO	NO	NO	NO	NO	NO
FBgn0034606	ASPP	2	NO	NO	NO	NO	NA	NO	22.5356	2.53558	4	NO	YES	YES	NO	NO	NO	NO	NO	NO	NO
FBgn0032796	cyst	2	NO	NO	NO	NO	NA	NO	2.00674	0.929934	4	YES	NO	YES	NA	NA	NA	NO	NO	NO	NO
FBgn0025681	CG3558	2	NO	NO	NO	NO	NA	NO	4.15851	12.0631	4	YES	YES	NO	NO	NO	NO	NA	NA	NO	NO
FBgn0001978	stc	2	NO	NO	NO	NO	NA	NO	25.2738	16.1624	4	NO	NO	NO	YES	NO	YES	NO	NO	NO	NO
FBgn0025595	AkhR	2	NO	NO	NO	NO	NA	NO	0.134851	1.04151	4	NO	NO	NO	YES	YES	NO	NO	NO	NO	YES
FBgn0036518	RhoGAP71E	2	NO	NO	NO	NO	NA	NO	3.6484	38.3333	4	NO	NO	NO	NO	YES	YES	NO	NO	NO	NO
FBgn0004390	RasGAP1	2	NO	NO	NO	NO	NA	NO	3.46453	2.30063	4	NO	NO	NO	NO	YES	YES	NO	NO	NO	NO
FBgn0265276	l(3)neo38	2	NO	NO	NO	NO	NA	NO	6.88684	2.16101	4	NO	YES	NO	YES	NO	NO	NO	NO	NO	NO
FBgn0010052	Jhe	2	NO	NO	NO	NO	NA	NO	1.79021	1.25906	4	YES	NO	YES	NO	NO	NO	NO	NO	NO	NO
FBgn0039754	CG9747	2	NO	NO	NO	NO	NA	NO	89.9416	8.93631	4	NA	YES	YES	NO	NO	NO	NO	NO	NO	NO
FBgn0033904	CG18327	2	NO	NO	NO	NO	NA	NO	0.185848	0.308129	0	NA	NA	NA	YES	NO	YES	NO	NO	NO	NO
FBgn0288232	Cyp6a21	2	NO	NO	NO	NO	NA	NO	2.22928	1.79428	4	YES	YES	NO	NO	NO	NO	NO	NO	NO	NO
FBgn0261286	Mat89Ba	2	NO	NO	NO	NO	NA	NO	2.07215	4.19661	4	YES	YES	NO	NA	NA	NA	NO	NO	NA	NO
FBgn0038640	CG7706	2	NO	NO	NO	NO	NA	NO	3.06706	7.0361	1	NO	NO	NO	YES	NO	YES	NO	NO	NO	NO
FBgn0032733	CG15170	2	NO	NO	NO	NO	NA	NO	0	0	0	NA	NA	NA	NA	YES	YES	NA	NA	NA	NO
FBgn0035358	CG14949	2	NO	NO	NO	NO	NA	NO	0.164121	0.551226	4	YES	YES	NO	NO	NO	NO	NO	NO	NO	YES
FBgn0011692	pav	2	NO	NO	NO	NO	NA	NO	0	4.91061	0	NA	NA	NA	YES	YES	NO	NA	NA	NA	NO
FBgn0016978	snRNP-U1-70K	2	NO	NO	NO	NO	NA	NO	10.0935	16.2713	4	YES	YES	NO	NO	NO	NO	NO	NO	NO	NO
FBgn0261547	Exn	2	NO	NO	NO	NO	NA	NO	11.4777	2.92785	4	NO	NO	NO	YES	NO	YES	NO	NO	NO	NO
FBgn0015776	nrv1	2	NO	NO	NO	YES	NA	NO	33.8295	14.2145	4	YES	YES	NO	NO	NO	NO	NO	NO	NO	NO
FBgn0259224	CG42324	2	NO	NO	NO	NO	NA	NO	2.51971	2.81152	4	NO	NA	NO	YES	NO	YES	NA	NO	NO	NO
FBgn0004893	bowl	2	NO	NO	NO	NO	NA	NO	11.2315	5.32966	4	NO	NO	NO	NO	YES	YES	NO	NO	NO	NO
FBgn0036147	Plod	2	NO	NO	NO	NO	NA	NO	3.56994	6.7846	4	NO	NO	NO	YES	YES	NO	NO	NO	NO	NO
FBgn0002036	CG10561	2	NO	NO	NO	NO	NA	NO	2.93489	138.54	4	YES	YES	NO	NO	NO	NO	NO	NO	NO	NO
FBgn0033246	ACC	2	NO	NO	NO	YES	NA	NO	6.73087	6.54407	4	NO	NO	NO	YES	NO	YES	NO	NO	NO	NO
FBgn0031573	CG3407	2	NO	NO	NO	NO	NA	NO	0.892758	2.88941	3	NO	NO	NO	YES	YES	NO	NO	NO	NO	NO
FBgn0034068	casp	2	NO	NO	NO	NO	NA	NO	12.2508	72.4398	4	YES	YES	NO	NO	NO	NO	NO	NO	NO	NO
FBgn0031879	uif	2	NO	NO	NO	NO	NA	NO	0.036761	0.541612	0	YES	YES	NO	NO	NO	NO	NO	NO	NO	NO
FBgn0036376	Liprin-beta	2	NO	NO	NO	NO	NA	NO	11.0114	17.3289	4	NO	NO	NO	NO	NO	NO	YES	YES	NO	NO
FBgn0039829	CG15561	2	NO	NO	NO	NO	NA	NO	2.17027	9.04938	1	NO	NO	NO	YES	NO	YES	NO	NO	NO	NO
FBgn0033638	CG9005	2	NO	NO	NO	NO	NA	NO	13.7508	4.4224	4	NA	NA	NA	NO	YES	YES	NO	NO	NO	NO
FBgn0031313	CG5080	2	NO	NO	NO	NO	NA	NO	1.8501	4.24215	3	NO	NO	NO	YES	YES	NO	NO	NO	NO	NO
FBgn0039761	CG18404	2	NO	NO	NO	NO	NA	NO	0	0	0	NA	NA	NA	NO	YES	YES	NA	NA	NO	NO
FBgn0035933	CG13309	2	NO	YES	NO	NO	NA	NO	0	0.708519	1	NO	NA	NA	NO	NO	NO	YES	YES	NO	NO
FBgn0034304	CG5742	2	NO	NO	NO	NO	NA	NO	5.19145	3.43544	4	NO	YES	YES	NO	NO	NO	NO	NO	NO	NO
FBgn0016075	vkg	2	NO	NO	NO	YES	NA	NO	6.10439	6.15283	4	YES	YES	NO	NO	NO	NO	NO	NO	NO	NO
FBgn0033987	ckn	2	NO	NO	NO	NO	NA	NO	9.47701	3.98878	4	NO	NO	NO	YES	NO	YES	NO	NO	NO	NO
FBgn0035309	CG15879	2	NO	NO	NO	NO	NA	NO	2.11917	0.301248	4	NO	NO	NO	NO	YES	YES	NO	NO	NO	NO
FBgn0039696	Rnb	2	NO	NO	NO	NO	NA	NO	2.04086	7.28304	4	YES	YES	NO	NO	NO	NO	NO	NO	NO	NO
FBgn0033302	Cyp6a14	2	NO	NO	NO	NO	NA	NO	0.862033	0.263964	0	NO	NA	NO	YES	NO	YES	NO	NO	NO	NO
FBgn0034046	tun	2	NO	NO	NO	NO	NA	NO	3.63458	35.0672	4	YES	YES	NO	NO	NO	NO	NO	NO	NO	NO
FBgn0051223	CG31223	2	NO	NO	NO	NO	NA	NO	2.55009	2.1555	4	NO	NO	NO	YES	NO	YES	NO	NO	NO	NO
FBgn0033316	Gle1	2	NO	NO	NO	NO	NA	NO	2.8719	19.7685	3	NO	NO	NO	NO	YES	YES	NO	NO	NO	NO
FBgn0087007	bbg	2	NO	NO	NO	YES	NA	NO	10.1778	9.2216	4	NO	NO	NO	YES	NO	YES	NO	NO	NO	NO
FBgn0033320	CG8586	2	NO	NO	NO	NO	NA	NO	16.8161	3.07744	4	YES	YES	NO	NO	NO	NO	NO	NO	NO	NO
FBgn0034085	Ptp52F	2	NO	NO	NO	NO	NA	NO	0.274577	1.11334	4	YES	NO	YES	NO	NO	NO	NO	NO	NO	YES
FBgn0053519	Unc-89	2	NO	NO	NO	YES	NA	NO	3.7503	0.706082	4	NO	YES	NO	NO	YES	NO	NO	NO	NO	NO
FBgn0041710	yellow-f	2	NO	NO	NO	NO	NA	NO	0.095678	2.20854	1	YES	YES	NO	NO	NO	NA	NO	NA	NO	NO
FBgn0052082	IRSp53	2	NO	NO	NO	YES	NA	NO	1.03335	1.95442	4	NO	NO	NO	YES	NA	YES	NO	NO	NO	NO
FBgn0039620	wat	2	NO	NO	NO	NO	NA	NO	19.7044	3.54121	3	NO	NO	NO	YES	NO	YES	NO	NO	NO	NO
FBgn0050395	CG30395	1	NO	YES	NO	NO	MC	YES	943.678	17.8376	0	NA	NA	NA	YES	NA	NA	NA	NA	NA	NO
FBgn0037897	CG5270	1	NO	NO	NO	YES	NA	NO	2.62111	4.54713	4	YES	NO	NO	NO	NO	NO	NO	NO	NO	NO
FBgn0050371	CG30371	1	NO	NO	NO	NO	NA	NO	0	0.103279	0	NO	NO	NO	NO	YES	NO	NO	NO	NO	NO
FBgn0051344	CG31344	1	NO	NO	NO	NO	NA	NO	1.0791	3.53139	4	YES	NO	NO	NO	NO	NO	NA	NA	NA	NO
FBgn0032683	kon	1	NO	NO	NO	NO	NA	NO	1.70359	0.24621	4	NO	YES	NO	NO	NO	NO	NO	NO	NO	NO
FBgn0038074	Gnmt	1	NO	NO	NO	NO	NA	NO	1.38718	8.0449	4	YES	NO	NO	NO	NO	NO	NA	NA	NO	NO
FBgn0035268	CG8001	1	NO	NO	NO	NO	NA	NO	8.9474	125.777	4	NO	NO	NO	NO	NO	YES	NO	NO	NO	NO
FBgn0022987	qkr54B	1	NO	NO	NO	NO	NA	NO	1.85462	3.50944	4	NO	YES	NO	NO	NO	NO	NO	NO	NO	NO
FBgn0033821	CG10799	1	NO	NO	NO	NO	NA	NO	0.857071	7.9542	3	YES	NO	NO	NO	NO	NO	NO	NO	NO	NO
FBgn0038348	AOX2	1	NO	NO	NO	NO	NA	NO	0.164058	2.08551	4	NA	NO	NA	NA	YES	NO	NO	NA	NO	NO
FBgn0051638	CG31638	1	NO	NO	NO	NO	NA	NO	2.02458	3.17233	4	YES	NO	NO	NO	NO	NO	NO	NO	NO	NO
FBgn0261276	Opa1	1	NO	NO	NO	YES	NA	NO	15.2443	11.1505	4	NO	YES	NO	NO	NO	NO	NO	NO	NO	NO
FBgn0050115	GEFmeso	1	NO	NO	NO	NO	NA	NO	8.53879	3.0574	4	NO	YES	NO	NO	NO	NO	NO	NO	NO	NO
FBgn0034269	Hyccin	1	NO	NO	NO	NO	NA	NO	18.8881	8.62157	4	NO	YES	NO	NO	NO	NO	NO	NO	NO	NO
FBgn0030242	sofe	1	NO	NO	NO	NO	NA	NO	0.566568	51.1754	2	NA	NA	NA	NA	YES	NA	NA	NA	NA	NO
FBgn0036684	CG3764	1	NO	NO	NO	NO	NA	NO	8.91917	2.96023	4	NA	NO	NO	NO	NO	YES	NO	NO	NO	NO
FBgn0034903	sona	1	NO	NO	NO	NO	NA	NO	1.03269	6.18385	0	NO	NO	NA	NO	YES	NO	NO	NO	NO	NO
FBgn0003279	RpL4	1	NO	NO	NO	YES	NA	NO	811.221	279.985	4	NA	NA	NA	NO	NO	YES	NO	NO	NO	NO
FBgn0033750	CG13151	1	NO	NO	NO	NO	NA	NO	2.33818	4.11793	2	NO	YES	NO	NO	NO	NO	NO	NO	NO	NO
FBgn0031764	CG9107	1	NO	NO	NO	NO	NA	NO	7.51044	20.0537	1	NO	YES	NO	NA	NA	NA	NO	NO	NO	NO
FBgn0002526	LanA	1	NO	NO	NO	YES	NA	NO	9.51312	3.15653	4	NO	YES	NA	NO	NO	NO	NO	NA	NO	NO
FBgn0082582	tmod	1	NO	NO	NO	NO	MC	YES	37.112	27.0231	4	NO	YES	NO	NO	NO	NO	NO	NO	NO	NO
FBgn0053556	form3	1	NO	NO	NO	NO	SC	YES	2.04722	2.54954	4	NO	YES	NA	NO	NO	NO	NO	NO	NO	NO
FBgn0031895	CG4497	1	NO	NO	NO	NO	NA	NO	1.0943	9.26127	4	NO	NO	NO	YES	NO	NO	NO	NO	NO	NO
FBgn0004858	elB	1	NO	NO	NO	NO	NA	NO	18.4654	2.14889	4	NO	NO	NO	NO	NO	YES	NO	NO	NO	NO
FBgn0039994	conu	1	NO	NO	NO	NO	NA	NO	6.23578	9.87859	4	NO	NO	NO	YES	NO	NO	NO	NO	NO	NO
FBgn0265991	Zasp52	1	NO	NO	NO	NO	SC	YES	17.575	8.73756	4	NO	YES	NO	NO	NO	NO	NO	NO	NO	NO
FBgn0264695	Mhc	1	NO	NO	NO	YES	NA	NO	110.775	29.0587	4	NO	YES	NO	NO	NO	NO	NO	NO	NO	NO
FBgn0020493	Dad	1	NO	NO	NO	NO	NA	NO	8.78452	4.79949	4	NO	NO	NO	NO	YES	NO	NO	NO	NO	NO
FBgn0031902	Wnt6	1	NO	NO	NO	NO	NA	NO	5.19056	4.23114	4	NO	YES	NO	NO	NO	NO	NO	NA	NA	NO
FBgn0027873	Cpsf100	1	NO	NO	NO	NO	NA	NO	4.3596	5.00664	4	NA	NA	NA	NO	NO	YES	NO	NA	NA	NO
FBgn0003137	Ppn	1	NO	NO	NO	YES	NA	NO	0.749419	2.29916	4	NO	YES	NA	NO	NO	NO	NO	NO	NO	NO
FBgn0039818	CG11318	1	NO	NO	NO	NO	NA	NO	2.7003	0.187147	0	NA	NO	NA	NA	YES	NO	NA	NA	NA	NO
FBgn0250908	beat-VII	1	NO	NO	NO	NO	NA	NO	0.515399	0.038299	4	NO	YES	NA	NO	NO	NO	NO	NA	NA	NO
FBgn0050272	MFS1	1	NO	NO	NO	NO	NA	NO	0	0	0	NA	NA	NO	NA	NA	YES	NA	NO	NA	NO
FBgn0034454	CG15120	1	NO	NO	NO	NO	NA	NO	0	0.212346	0	NO	NO	NA	YES	NO	NO	NO	NO	NO	NO
FBgn0004620	GluRIIA	1	NO	NO	NO	NO	NA	NO	2.35959	1.12511	4	NO	YES	NO	NO	NO	NO	NO	NO	NO	NO
FBgn0034956	CG4324	1	NO	NO	NO	NO	NA	NO	0	0.122398	0	NA	NO	NA	NA	YES	NA	NO	NA	NO	NO
FBgn0034265	Snx16	1	NO	NO	NO	NO	NA	NO	7.98631	7.16139	4	NO	YES	NO	NA	NA	NA	NO	NO	NA	NO
FBgn0266417	ringer	1	NO	NO	NO	NO	NA	NO	34.8057	12.085	4	NO	YES	NO	NO	NO	NO	NO	NO	NO	NO
FBgn0015279	Pi3K92E	1	NO	NO	NO	NO	NA	NO	6.75594	6.29474	4	NO	NO	NO	NO	YES	NO	NO	NO	NO	NO
FBgn0031392	AIF	1	NO	NO	NO	YES	NA	NO	7.28819	87.9735	4	NO	NO	YES	NO	NO	NO	NO	NO	NO	NO
FBgn0033763	CG8646	1	NO	NO	NO	NO	NA	NO	1.93741	3.33752	0	NA	NO	NA	NA	YES	NA	NO	NA	NA	NO
FBgn0038079	NijC	1	NO	NO	NO	NO	NA	NO	1.4073	1.54588	0	NO	YES	NO	NA	NA	NA	NO	NO	NO	NO
FBgn0031549	Spindly	1	NO	NO	NO	NO	NA	NO	0.157492	12.9326	3	NA	NO	NA	YES	NO	NO	NO	NA	NA	NO
FBgn0035578	CG13707	1	NO	NO	NO	NO	NA	NO	0.081339	0.24321	4	NO	YES	NO	NO	NO	NO	NO	NA	NO	NO
FBgn0260943	Rbp6	1	NO	NO	NO	NO	NA	NO	0.79825	4.7579	4	NO	NO	NO	NO	YES	NO	NO	NO	NO	NO
FBgn0033679	CG8888	1	NO	NO	NO	YES	NA	NO	18.1631	4.25004	4	NO	YES	NO	NO	NO	NO	NO	NO	NO	NO
FBgn0004133	blow	1	NO	NO	NO	NO	NA	NO	87.3676	14.5033	2	NA	YES	NA	NO	NO	NO	NO	NA	NA	NO
FBgn0031374	Wdr62	1	NO	NO	NO	NO	NA	NO	17.1461	24.8018	4	YES	NO	NO	NO	NO	NO	NO	NO	NO	NO
FBgn0031869	CG18304	1	NO	NO	NO	NO	NA	NO	53.259	3.35405	4	NA	YES	NO	NO	NO	NA	NO	NO	NO	NO
FBgn0011828	Pxn	1	NO	NO	NO	NO	NA	NO	21.1071	13.0589	4	NO	YES	NO	NO	NO	NO	NO	NO	NA	NO
FBgn0264693	ens	1	NO	NO	NO	YES	NA	NO	24.0842	16.4247	4	YES	NO	NO	NO	NO	NO	NO	NO	NO	NO
FBgn0260745	mfas	1	NO	YES	YES	YES	SC	YES	1486.81	146.034	4	NO	NO	NO	YES	NO	NO	NO	NO	NO	NO
FBgn0085384	CG34355	1	NO	NO	NO	NO	NA	NO	0.131664	2.43471	4	NO	YES	NO	NO	NO	NO	NO	NO	NO	NO
FBgn0053143	CG33143	1	NO	NO	NO	NO	NA	NO	0.508085	1.71478	4	NA	NO	NA	NA	YES	NA	NO	NA	NA	NO
FBgn0033913	CG8468	1	NO	NO	NO	NO	NA	NO	0	0.142164	1	YES	NO	NA	NO	NO	NO	NO	NO	NO	NO
FBgn0003308	ry	1	NO	NO	NO	NO	NA	NO	0.162673	2.98628	4	NO	NO	NO	YES	NO	NO	NO	NO	NO	YES
FBgn0028689	Rpn6	1	NO	NO	NO	NO	NA	NO	48.9295	220.736	4	NO	NO	YES	NO	NO	NO	NO	NO	NO	NO
FBgn0037705	mura	1	NO	NO	NO	NO	NA	NO	7.62798	6.58626	4	NO	NO	NO	NO	NO	YES	NO	NO	NO	NO
FBgn0039427	CG5447	1	NO	NO	NO	NO	NA	NO	5.9047	11.9526	4	NO	YES	NO	NO	NO	NO	NO	NO	NO	NO
FBgn0287775	18w	1	NO	NO	NO	NO	NA	NO	2.28329	1.92355	4	NO	NO	NO	NO	YES	NO	NO	NO	NO	NO
FBgn0010909	msn	1	NO	NO	NO	YES	NA	NO	11.3117	10.0227	4	NO	YES	NO	NO	NO	NO	NO	NO	NO	NO
FBgn0000064	Ald1	1	NO	NO	NO	YES	NA	NO	178.001	536.647	4	NO	YES	NO	NO	NO	NO	NO	NO	NO	NO
FBgn0062440	EMRE	1	NO	NO	NO	NO	NA	NO	19.7154	14.5506	4	NO	YES	NO	NO	NO	NO	NO	NO	NO	NO
FBgn0036801	MYPT-75D	1	NO	NO	NO	NO	NA	NO	5.01049	3.46372	4	YES	NO	NO	NO	NO	NO	NO	NO	NO	NO
FBgn0005596	yem	1	NO	NO	NO	NO	NA	NO	2.10434	6.46765	3	NO	NO	YES	NO	NO	NO	NA	NA	NO	NO
FBgn0036727	SecCl	1	NO	NO	NO	NO	EDC	YES	53.5563	1.78958	4	NA	NO	NA	NO	YES	NA	NO	NA	NO	NO
FBgn0039688	Kul	1	NO	NO	NO	NO	NA	NO	3.08784	1.4873	4	NO	YES	NO	NO	NO	NO	NO	NO	NO	NO
FBgn0051158	Efa6	1	NO	NO	NO	NO	NA	NO	4.76116	10.1225	4	NO	NO	NO	NO	YES	NO	NO	NO	NO	NO
FBgn0033250	CG14762	1	NO	NO	NO	NO	NA	NO	0.217472	0.303217	1	YES	NO	NO	NO	NO	NO	NO	NO	NO	NO
FBgn0032387	CG16965	1	NO	NO	NO	NO	NA	NO	0.090336	3.2423	3	NO	YES	NA	NO	NO	NO	NO	NO	NO	NO
FBgn0286071	AdamTS-A	1	NO	NO	NO	NO	NA	NO	5.96389	0.978205	4	NO	NO	NO	YES	NO	NO	NO	NO	NO	NO
FBgn0034933	CG3735	1	NO	NO	NO	NO	NA	NO	3.58962	5.48309	4	NO	YES	NO	NO	NO	NO	NO	NO	NO	NO
FBgn0031887	Ugt307A1	1	NO	NO	NO	NO	NA	NO	0	0	0	NO	YES	NO	NO	NO	NO	NO	NO	NO	NO
FBgn0036446	Mgat4a	1	NO	NO	NO	NO	NA	NO	1.69989	2.0872	4	NO	NO	NO	NO	NO	NO	YES	NO	NO	NO
FBgn0032178	Spn31A	1	NO	NO	NO	NO	NA	NO	1.05332	2.10811	3	NO	NO	NO	NO	YES	NO	NO	NO	NO	NO
FBgn0001320	kni	1	NO	NO	NO	NO	NA	NO	3.49951	1.00835	1	NA	YES	NA	NA	NO	NA	NO	NA	NA	NO
FBgn0051457	CG31457	1	NO	NO	NO	NO	NA	NO	2.59175	6.41186	4	NO	YES	NO	NO	NO	NO	NO	NO	NO	NO
FBgn0011260	Sema2a	1	NO	NO	NO	NO	NA	NO	1.05846	9.6346	4	NA	NA	NA	NO	YES	NO	NO	NA	NO	NO
FBgn0050089	CG30089	1	NO	NO	NO	NO	NA	NO	0.486699	1.37855	4	NO	YES	NA	NO	NO	NO	NO	NA	NA	NO
FBgn0085400	side-V	1	NO	NO	NO	NO	NA	NO	0.329065	7.75931	4	NA	NO	NO	NA	YES	NO	NO	NA	NO	NO
FBgn0037445	CG9727	1	NO	NO	NO	NO	NA	NO	4.61334	5.63923	4	NO	NO	NO	NO	NO	YES	NO	NO	NO	NO
FBgn0036827	CG6843	1	NO	NO	NO	NO	NA	NO	5.6511	8.58302	3	NO	YES	NO	NO	NO	NO	NO	NO	NA	NO
FBgn0035871	BI-1	1	NO	NO	NO	YES	NA	NO	175.042	744.74	4	YES	NO	NO	NO	NO	NO	NO	NO	NO	NO
FBgn0000008	a	1	NO	NO	NO	NO	NA	NO	3.0521	1.12135	4	NO	NO	NO	NO	NO	YES	NO	NO	NO	NO
FBgn0020620	RN-tre	1	NO	NO	NO	NO	NA	NO	7.20979	24.6676	4	NO	NO	NO	NO	NO	YES	NO	NO	NO	NO
FBgn0265356	tn	1	NO	NO	NO	NO	NA	NO	8.50392	2.63687	4	NO	YES	NO	NO	NO	NO	NO	NO	NO	NO
FBgn0038353	CG5399	1	NO	NO	NO	NO	NA	NO	0.049328	99.8952	2	NA	NA	NA	NO	NO	YES	NA	NA	NA	NO
FBgn0037963	Cad87A	1	NO	NO	NO	NO	SC	YES	2.78651	1.9329	4	NO	NO	YES	NO	NO	NO	NA	NA	NA	NO
FBgn0286785	scb	1	NO	NO	NO	NO	NA	NO	37.4917	10.9909	4	NO	NO	NO	NO	NO	YES	NO	NO	NO	NO
FBgn0052251	Claspin	1	NO	NO	NO	NO	NA	NO	0.026623	0.141576	0	NA	NO	NA	YES	NO	NO	NA	NA	NA	NO
FBgn0038130	CG8630	1	NO	NO	NO	NO	NA	NO	41.6271	1.07378	1	NO	YES	NO	NO	NO	NO	NO	NO	NO	NO
FBgn0037814	CG6325	1	NO	NO	NO	NO	NA	NO	1.82897	11.0236	4	YES	NO	NO	NO	NO	NO	NO	NO	NO	NO
FBgn0036381	CG8745	1	NO	NO	NO	NO	NA	NO	0.475991	1.80434	3	NA	NO	NO	NO	NO	YES	NO	NO	NO	NO
FBgn0039559	NSD	1	NO	NO	NO	NO	NA	NO	4.39807	8.86485	4	YES	NO	NO	NO	NO	NO	NO	NO	NO	NO
FBgn0283503	Neurl4	1	NO	NO	NO	NO	NA	NO	2.20644	10.6962	4	NO	NO	NO	NO	NO	YES	NO	NO	NO	NO
FBgn0031981	Megf8	1	NO	NO	NO	NO	NA	NO	0.933806	2.4796	4	NO	NO	NA	NO	YES	NO	NO	NA	NO	NO
FBgn0022764	Sin3A	1	NO	NO	NO	NO	NA	NO	24.451	4.21566	4	NO	NO	NO	NO	NO	YES	NO	NO	NO	NO
FBgn0034439	CG10062	1	NO	NO	NO	NO	NA	NO	0.352198	14.924	2	NA	NO	NO	NO	NO	YES	NO	NA	NO	NO
FBgn0259237	CG42335	1	NO	NO	NO	NO	NA	NO	0	0	0	NA	NA	NA	NA	NO	YES	NA	NO	NO	NO
FBgn0032836	CG10680	1	NO	NO	NO	NO	NA	NO	1.89607	2.68086	4	NO	NO	NO	NO	YES	NO	NO	NO	NO	NO
FBgn0038721	subdued	1	NO	NO	NO	NO	NA	NO	1.54165	4.66993	4	NO	NO	NO	NO	NO	YES	NO	NO	NO	NO
FBgn0026418	Hsc70Cb	1	NO	NO	NO	YES	SC	YES	41.8388	66.2062	4	YES	NO	NO	NO	NO	NO	NO	NO	NO	NO
FBgn0035237	CG13917	1	NO	NO	NO	NO	NA	NO	10.9938	4.64226	4	NO	YES	NO	NO	NO	NO	NO	NO	NO	NO
FBgn0034784	CG9826	1	NO	NO	NO	NO	NA	NO	0	0.534598	0	NA	NA	NO	NA	NA	YES	NO	NO	NO	NO
FBgn0052062	Rbfox1	1	NO	NO	NO	NO	SC	YES	1.74729	12.8998	4	NO	NO	NO	YES	NO	NO	NO	NO	NO	NO
FBgn0032435	Oatp33Eb	1	NO	NO	NO	NO	NA	NO	0	0.150292	0	NA	NA	NO	NO	NO	YES	NA	NO	NO	NO
FBgn0039809	CG15547	1	NO	NO	NO	YES	NA	NO	3.39134	116.494	4	NO	YES	NO	NO	NO	NO	NO	NO	NO	NO
FBgn0036770	Prestin	1	NO	NO	NO	NO	NA	NO	2.78297	8.9272	4	NO	NO	NO	YES	NO	NO	NO	NO	NO	NO
FBgn0038223	Afti	1	NO	NO	NO	NO	NA	NO	3.78105	22.6786	4	NO	YES	NO	NO	NO	NO	NO	NO	NO	NO
FBgn0265623	Su(z)2	1	NO	NO	NO	NO	NA	NO	4.70467	1.26056	4	NO	NO	NO	NO	NO	YES	NO	NO	NO	NO
FBgn0010452	trn	1	NO	NO	NO	NO	NA	NO	3.00029	3.32674	4	NO	NO	NO	NO	NO	YES	NO	NO	NO	NO
FBgn0265998	Doa	1	NO	NO	NO	YES	NA	NO	8.72457	10.4359	4	NO	YES	NO	NO	NO	NO	NO	NO	NO	NO
FBgn0032763	CG17568	1	NO	NO	NO	NO	NA	NO	0.857717	4.39338	3	NO	YES	NO	NO	NO	NO	NO	NO	NO	NO
FBgn0000075	amd	1	NO	NO	NO	NO	NA	NO	0.201448	2.22375	0	NA	NO	NO	NA	YES	NA	NO	NA	NA	NO
FBgn0026593	CG5707	1	NO	NO	NO	NO	NA	NO	3.82165	0.240584	4	NO	NO	NO	YES	NO	NO	NO	NO	NO	NO
FBgn0001296	kar	1	NO	NO	NO	NO	NA	NO	19.0124	1.75324	1	NO	YES	NO	NO	NO	NO	NO	NO	NO	NO
FBgn0024921	Tnpo	1	NO	NO	NO	NO	NA	NO	6.56415	7.34223	4	NO	YES	NO	NA	NA	NA	NO	NO	NO	NO
FBgn0039302	Nup358	1	NO	NO	NO	YES	NA	NO	10.9998	8.29608	4	NO	YES	NO	NA	NA	NA	NO	NO	NA	NO
FBgn0086895	pea	1	NO	NO	NO	NO	NA	NO	1.9918	2.41905	4	NO	NO	NO	YES	NO	NO	NO	NO	NO	NO
FBgn0031855	meng	1	NO	NO	NO	NO	NA	NO	0.175561	0.909337	4	NO	NO	NO	NO	YES	NO	NO	NO	NO	NO
FBgn0259678	sqa	1	NO	NO	NO	NO	NA	NO	2.28202	1.21081	4	NO	NO	NO	NO	YES	NO	NO	NO	NO	NO
FBgn0267337	rn	1	NO	NO	NO	NO	NA	NO	0.536867	9.13427	0	NA	YES	NA	NA	NO	NA	NO	NA	NA	NO
FBgn0003062	Fib	1	NO	NO	NO	YES	NA	NO	24.8673	34.1455	3	NO	NO	NO	NO	YES	NO	NO	NO	NA	NO
FBgn0019949	Cdk9	1	NO	NO	NO	NO	NA	NO	5.61929	17.0261	4	NO	NO	NO	NO	YES	NO	NO	NO	NO	NO
FBgn0264089	sli	1	NO	NO	NO	NO	NA	NO	0.577048	1.72132	4	NA	YES	NA	NO	NO	NA	NO	NA	NA	NO
FBgn0039686	CG15506	1	NO	NO	NO	NO	NA	NO	2.52486	4.96808	4	YES	NO	NO	NO	NO	NO	NO	NA	NO	NO
FBgn0052133	Ptip	1	NO	NO	NO	NO	NA	NO	2.05932	0.516676	4	NO	NA	NO	NO	NO	YES	NA	NA	NA	NO
FBgn0038237	Pde6	1	NO	NO	NO	NO	SC	YES	20.5463	1.46978	4	NO	NO	NO	NO	NO	YES	NA	NO	NO	NO
FBgn0085232	CG34203	1	NO	NO	NO	NO	NA	NO	0	1.71676	0	YES	NO	NO	NO	NO	NO	NO	NO	NO	NO
FBgn0036105	Blos4	1	NO	NO	NO	NO	NA	NO	4.34683	2.09442	3	NO	NO	NO	NO	NO	YES	NO	NO	NO	NO
FBgn0042129	OS9	1	NO	NO	NO	NO	NA	NO	0	2.11974	0	YES	NO	NA	NO	NO	NO	NO	NO	NA	NO
FBgn0262111	f	1	NO	NO	NO	NO	NA	NO	0.146344	0.813734	0	NA	NO	NA	NA	YES	NA	NO	NA	NA	NO
FBgn0039861	pasha	1	NO	NO	NO	NO	NA	NO	2.27034	10.226	2	YES	NO	NO	NO	NO	NO	NO	NO	NO	NO
FBgn0265262	Vha68-1	1	NO	NO	NO	YES	NA	NO	2.72249	20.2887	4	NO	YES	NO	NO	NO	NO	NO	NO	NO	NO
FBgn0010226	GstS1	1	NO	NO	YES	YES	NA	YES	31.8143	1807.27	4	YES	NO	NO	NO	NO	NO	NO	NO	NO	NO
FBgn0004507	GlyP	1	NO	NO	NO	YES	NA	NO	21.7814	25.5449	4	NO	NO	NO	NO	NO	NO	NO	NO	YES	NO
FBgn0042180	CG18870	1	NO	NO	NO	NO	NA	NO	0.811029	6.9692	2	NO	NO	YES	NO	NO	NO	NO	NO	NO	NO
FBgn0034655	CG10307	1	NO	NO	NO	NO	NA	NO	1.5253	214.455	4	NO	YES	NO	NO	NO	NO	NO	NO	NO	NO

## Sheet: Table S6
Table S6: Concordance Within a Cross
Cross	Genes with Male transcript in any organ	Genes with Male transcript in all organs	Ratio
RAL 304 x RAL 517	462	268	0.58
RAL 307 x RAL 517	525	349	0.665

## Sheet: Table S7
Table S7: Concordance between RAL 304 and RAL 307
Organ	Genes with Male transcripts in any RAL line	Genes with Male transcripts in both RAL 304 and RAL 307	Genes with detectable transcripts in both RAL 304 and RAL 307	Ratio
Parovaria	706	89	366	0.243
Seminal Receptacle	758	108	399	0.271
Spermatheca	673	79	358	0.221

## Sheet: Table S8
Table S8: Male Derived Transcript Abundance in Mean Counts per SNP
GeneID	RAL 304 Parovaria	RAL 304 Seminal Receptacle	RAL 304 Spermatheca	RAL 307 Parovaria	RAL 307 Seminal Receptacle	RAL 307 Spermatheca	Library With The Highest Coverage
FBgn0034641	NA	4.1	4.167	4.591	4.143	6.5	307 spermatheca
FBgn0003391	5.273	5.583	NA	NA	NA	NA	304 seminal receptacle
FBgn0024285	NA	NA	NA	34.947	21.167	42.737	307 spermatheca
FBgn0036460	17.846	28.231	9.846	NA	NA	NA	304 seminal receptacle
FBgn0035588	NA	NA	NA	129.4	63.4	79.6	307 parovaria
FBgn0010825	NA	NA	NA	NA	13.375	15	307 spermatheca
FBgn0032775	NA	NA	NA	NA	18.556	9.5	307 seminal receptacle
FBgn0262559	NA	NA	NA	288.8	287.4	294.8	307 spermatheca
FBgn0037934	103.438	NA	6.133	118.571	NA	25	307 parovaria
FBgn0001250	NA	NA	NA	4.833	29.125	9	307 seminal receptacle
FBgn0038130	NA	38.8	NA	NA	NA	NA	304 seminal receptacle
FBgn0259224	NA	NA	NA	19.556	NA	7.25	307 parovaria
FBgn0038074	40.286	NA	NA	NA	NA	NA	304 parovaria
FBgn0067102	6.833	6.778	4.25	NA	NA	NA	304 parovaria
FBgn0033638	NA	NA	NA	NA	5.636	9.667	307 spermatheca
FBgn0038810	27.625	17.25	29.75	NA	NA	NA	304 spermatheca
FBgn0011236	NA	NA	NA	4.857	8.4	15.273	307 spermatheca
FBgn0038476	NA	NA	NA	18.25	47.375	8.833	307 seminal receptacle
FBgn0034366	7	6	5.882	NA	NA	NA	304 parovaria
FBgn0035541	64.25	80.125	62.375	NA	NA	NA	304 seminal receptacle
FBgn0038237	NA	NA	NA	NA	NA	7.875	307 spermatheca
FBgn0039620	NA	NA	NA	13.429	NA	8.333	307 parovaria
FBgn0036187	NA	15.2	NA	31.8	17	23.6	307 parovaria
FBgn0261618	13.5	9.455	6.571	NA	NA	NA	304 parovaria
FBgn0027580	13.667	5.444	NA	NA	NA	NA	304 parovaria
FBgn0038330	11.125	8.25	7.571	NA	NA	NA	304 parovaria
FBgn0038223	NA	4	NA	NA	NA	NA	304 seminal receptacle
FBgn0031893	23.556	31.889	23.778	NA	NA	NA	304 seminal receptacle
FBgn0015279	NA	NA	NA	NA	5.273	NA	307 seminal receptacle
FBgn0035763	66	59	38.667	118.364	122.909	129.091	307 spermatheca
FBgn0052251	NA	NA	NA	4	NA	NA	307 parovaria
FBgn0034903	NA	NA	NA	NA	8.1	NA	307 seminal receptacle
FBgn0263599	NA	NA	NA	7.889	6.733	11	307 spermatheca
FBgn0085400	NA	NA	NA	NA	4.167	NA	307 seminal receptacle
FBgn0033762	NA	NA	NA	7.556	13.7	11.952	307 seminal receptacle
FBgn0034814	NA	NA	NA	17.778	19.889	22.778	307 spermatheca
FBgn0033446	187.333	146.833	123.4	NA	NA	NA	304 parovaria
FBgn0267823	39.333	NA	54.8	NA	NA	NA	304 spermatheca
FBgn0062440	NA	75.6	NA	NA	NA	NA	304 seminal receptacle
FBgn0014396	17.333	15.739	15.32	15.474	17.9	19.316	307 spermatheca
FBgn0085232	10.7	NA	NA	NA	NA	NA	304 parovaria
FBgn0039754	NA	71.75	10	NA	NA	NA	304 seminal receptacle
FBgn0042180	NA	NA	5.7	NA	NA	NA	304 spermatheca
FBgn0020620	NA	NA	NA	NA	NA	7.833	307 spermatheca
FBgn0034606	NA	4.333	3.8	NA	NA	NA	304 seminal receptacle
FBgn0026432	NA	NA	NA	NA	5.32	4.571	307 seminal receptacle
FBgn0015372	7.6	16.4	6.4	NA	NA	NA	304 seminal receptacle
FBgn0033315	NA	NA	NA	NA	8.667	9	307 spermatheca
FBgn0031529	72.8	55.467	69.2	51.833	57.333	37	304 parovaria
FBgn0039629	NA	NA	NA	125.333	11.818	31.25	307 parovaria
FBgn0051116	14.714	7.5	17.857	15.125	7.143	114.875	307 spermatheca
FBgn0263602	7.875	11.5	4.5	12.444	22.667	16.286	307 seminal receptacle
FBgn0019949	NA	NA	NA	NA	15.4	NA	307 seminal receptacle
FBgn0261934	NA	NA	NA	6.812	7.143	7	307 seminal receptacle
FBgn0030872	NA	NA	NA	46.8	49	56.4	307 spermatheca
FBgn0024234	NA	NA	NA	49.5	108.833	87.833	307 seminal receptacle
FBgn0003093	NA	NA	NA	10.083	13.5	15.111	307 spermatheca
FBgn0286071	NA	NA	NA	3.833	NA	NA	307 parovaria
FBgn0032646	16.083	40.889	8.3	NA	NA	NA	304 seminal receptacle
FBgn0028371	8.474	32.292	8.686	11.4	54.258	22.931	307 seminal receptacle
FBgn0012058	NA	NA	NA	12	12.75	17.125	307 spermatheca
FBgn0013733	4.846	7.25	5.429	5.739	8.711	8.306	307 seminal receptacle
FBgn0036887	13.4	16.5	10.333	43.667	57	45.5	307 seminal receptacle
FBgn0037622	NA	NA	NA	7	9.167	9.333	307 spermatheca
FBgn0031534	NA	NA	NA	33.833	29.667	38.333	307 spermatheca
FBgn0015618	NA	NA	NA	14.462	16.923	16.615	307 seminal receptacle
FBgn0050069	7.923	9.667	NA	8.632	13.294	12.056	307 seminal receptacle
FBgn0266670	NA	NA	NA	6.818	11.286	7	307 seminal receptacle
FBgn0028473	145	73.875	47.7	NA	NA	NA	304 parovaria
FBgn0000053	7.4	NA	NA	18.083	4.667	NA	307 parovaria
FBgn0259678	NA	NA	NA	NA	11.429	NA	307 seminal receptacle
FBgn0036454	NA	NA	NA	9.583	20.571	12.154	307 seminal receptacle
FBgn0045063	11	12.667	8.5	NA	NA	NA	304 seminal receptacle
FBgn0285917	4.588	8.562	6	NA	NA	NA	304 seminal receptacle
FBgn0031590	61.182	80.4	39.875	NA	NA	NA	304 seminal receptacle
FBgn0020388	10.444	10.857	10.375	NA	NA	NA	304 seminal receptacle
FBgn0267337	NA	15	NA	NA	NA	NA	304 seminal receptacle
FBgn0038826	NA	NA	NA	NA	7.833	5.4	307 seminal receptacle
FBgn0051233	NA	NA	NA	NA	23.25	54.125	307 spermatheca
FBgn0028689	NA	NA	32.6	NA	NA	NA	304 spermatheca
FBgn0260407	NA	NA	NA	19.167	9.833	10.667	307 parovaria
FBgn0086371	NA	NA	NA	NA	119.4	132	307 spermatheca
FBgn0013718	19.895	42.645	9.667	NA	NA	NA	304 seminal receptacle
FBgn0035802	NA	NA	NA	14.409	138.379	24.414	307 seminal receptacle
FBgn0034479	12.455	25.3	NA	NA	NA	NA	304 seminal receptacle
FBgn0034986	NA	NA	NA	21.333	30.1	26.6	307 seminal receptacle
FBgn0040752	12.75	10	11.071	16	9.7	16.941	307 spermatheca
FBgn0034083	6.5	4.438	3.4	5.071	7.625	6.5	307 seminal receptacle
FBgn0027081	NA	NA	NA	34.25	16.833	25.667	307 parovaria
FBgn0003062	NA	NA	NA	NA	21.286	NA	307 seminal receptacle
FBgn0016059	19.794	37.441	7.464	NA	NA	NA	304 seminal receptacle
FBgn0004360	NA	NA	NA	5	74.5	16.3	307 seminal receptacle
FBgn0039203	16.5	7.25	NA	NA	NA	NA	304 parovaria
FBgn0010583	10	5.583	6.375	NA	NA	NA	304 parovaria
FBgn0039756	99.467	125	68.733	NA	NA	NA	304 seminal receptacle
FBgn0086358	8.444	35.273	12.75	NA	NA	NA	304 seminal receptacle
FBgn0035947	NA	NA	NA	194.4	112.6	163.833	307 parovaria
FBgn0028543	89.75	139	74.833	NA	NA	NA	304 seminal receptacle
FBgn0283521	38.571	40.1	29	NA	NA	NA	304 seminal receptacle
FBgn0283681	NA	NA	NA	22.75	22.833	21.833	307 seminal receptacle
FBgn0064237	12.1	4.2	NA	NA	NA	NA	304 parovaria
FBgn0267828	NA	NA	NA	45.917	35.4	48.688	307 spermatheca
FBgn0020306	NA	NA	NA	9.375	NA	9.556	307 spermatheca
FBgn0034114	NA	8	NA	9.5	11.643	16.214	307 spermatheca
FBgn0033413	NA	NA	NA	33	36.571	52.143	307 spermatheca
FBgn0051343	NA	NA	NA	13.214	242.133	236	307 seminal receptacle
FBgn0025874	7.81	6	3.895	NA	NA	NA	304 parovaria
FBgn0000075	NA	NA	NA	NA	9.571	NA	307 seminal receptacle
FBgn0014869	87.375	98.2	110.8	NA	NA	NA	304 spermatheca
FBgn0040102	NA	149.267	NA	9.857	104.769	NA	304 seminal receptacle
FBgn0261279	NA	NA	NA	16.625	NA	34.714	307 spermatheca
FBgn0034859	NA	NA	NA	4.5	3.571	5.615	307 spermatheca
FBgn0003209	8.5	6.846	4	NA	NA	NA	304 parovaria
FBgn0032815	11.526	10	10.105	NA	NA	NA	304 parovaria
FBgn0000395	NA	3.643	NA	4.818	9.6	6	307 seminal receptacle
FBgn0015737	112	106.8	110.9	NA	NA	NA	304 parovaria
FBgn0031566	14.083	15.417	13.917	NA	NA	NA	304 seminal receptacle
FBgn0031260	NA	NA	NA	25	35.667	25.333	307 seminal receptacle
FBgn0010220	NA	NA	NA	NA	14.667	27.167	307 spermatheca
FBgn0036814	NA	NA	NA	6.556	5.2	4.444	307 parovaria
FBgn0263601	8.13	11.182	6.643	NA	NA	NA	304 seminal receptacle
FBgn0260936	29.333	13.417	6.273	NA	NA	NA	304 parovaria
FBgn0033875	49.789	64.842	39.105	NA	NA	NA	304 seminal receptacle
FBgn0035333	NA	NA	NA	9.556	12.647	12.778	307 spermatheca
FBgn0039600	NA	NA	NA	18.909	17.75	29.75	307 spermatheca
FBgn0262872	NA	NA	NA	6.625	12.471	10.182	307 seminal receptacle
FBgn0036381	NA	NA	NA	NA	NA	90.588	307 spermatheca
FBgn0039830	NA	NA	NA	203.5	199.833	190.333	307 parovaria
FBgn0034182	NA	NA	NA	NA	48.444	5	307 seminal receptacle
FBgn0027505	NA	NA	NA	5.483	3.6	7.297	307 spermatheca
FBgn0005695	NA	NA	NA	4	9.8	NA	307 seminal receptacle
FBgn0034729	11.2	8	5.6	NA	NA	NA	304 parovaria
FBgn0033987	NA	NA	NA	6.8	NA	7.5	307 spermatheca
FBgn0031652	33	29.444	22.444	NA	NA	NA	304 parovaria
FBgn0040305	NA	NA	NA	13.933	25.875	22.562	307 seminal receptacle
FBgn0260943	NA	NA	NA	NA	11.5	NA	307 seminal receptacle
FBgn0036316	73.4	51.6	56.692	NA	NA	NA	304 parovaria
FBgn0035318	NA	NA	NA	4	7.833	5.5	307 seminal receptacle
FBgn0262111	NA	NA	NA	NA	47.308	NA	307 seminal receptacle
FBgn0030242	NA	NA	NA	NA	5	NA	307 seminal receptacle
FBgn0033402	19	18.333	11.667	NA	NA	NA	304 parovaria
FBgn0038388	27.75	30.875	14	NA	NA	NA	304 seminal receptacle
FBgn0034387	17	11.375	7.462	NA	NA	NA	304 parovaria
FBgn0031638	9.333	21.444	9.667	NA	NA	NA	304 seminal receptacle
FBgn0265623	NA	NA	NA	NA	NA	4.5	307 spermatheca
FBgn0031990	6.143	4.864	5.059	16.091	10.118	14.333	307 parovaria
FBgn0035542	24.375	35.857	16.167	NA	NA	NA	304 seminal receptacle
FBgn0022160	NA	NA	NA	6.5	18.5	13.154	307 seminal receptacle
FBgn0039293	23.5	9.4	10.167	NA	NA	NA	304 parovaria
FBgn0261673	NA	NA	NA	5.5	38.444	NA	307 seminal receptacle
FBgn0034694	8.167	10.933	8.8	NA	NA	NA	304 seminal receptacle
FBgn0000721	25.714	5.8	14.833	NA	NA	NA	304 parovaria
FBgn0001125	147	80	86.077	NA	NA	NA	304 parovaria
FBgn0266696	NA	NA	NA	9.136	13.808	16.565	307 spermatheca
FBgn0085370	NA	NA	NA	NA	8.444	8.143	307 seminal receptacle
FBgn0036688	NA	8.333	NA	3.111	9.438	4.333	307 seminal receptacle
FBgn0032536	31.667	NA	14.55	NA	NA	NA	304 parovaria
FBgn0011693	NA	97.667	10	NA	NA	NA	304 seminal receptacle
FBgn0031981	NA	NA	NA	NA	4.3	NA	307 seminal receptacle
FBgn0035392	NA	NA	NA	9.625	5.636	9.25	307 parovaria
FBgn0263605	11.833	18.143	NA	NA	NA	NA	304 seminal receptacle
FBgn0002526	NA	10.857	NA	NA	NA	NA	304 seminal receptacle
FBgn0053143	NA	NA	NA	NA	4.364	NA	307 seminal receptacle
FBgn0005536	NA	NA	NA	4.4	6.2	8	307 spermatheca
FBgn0036136	77.909	72.091	56.091	NA	NA	NA	304 parovaria
FBgn0038742	42.833	23.333	15.667	NA	NA	NA	304 parovaria
FBgn0261564	NA	NA	NA	25.333	39.167	20.5	307 seminal receptacle
FBgn0034494	NA	NA	NA	34	5.556	12	307 parovaria
FBgn0034176	NA	NA	NA	102.5	142.8	149.7	307 spermatheca
FBgn0263697	7.538	3.8	3.889	28.625	28.375	33	307 spermatheca
FBgn0038211	NA	NA	NA	166.75	17.727	68.333	307 parovaria
FBgn0036816	NA	NA	NA	63.167	156.091	160.818	307 spermatheca
FBgn0036549	NA	NA	NA	79.2	22.4	31	307 parovaria
FBgn0034442	19.778	10.722	10.222	34.444	13.625	21.889	307 parovaria
FBgn0032480	NA	NA	NA	21.6	7	38.333	307 spermatheca
FBgn0004620	NA	15.278	NA	NA	NA	NA	304 seminal receptacle
FBgn0038922	NA	NA	NA	100.222	108.375	104.75	307 seminal receptacle
FBgn0029167	NA	25.143	NA	NA	24.075	NA	304 seminal receptacle
FBgn0025336	NA	NA	NA	43.714	63.571	29.714	307 seminal receptacle
FBgn0052479	5.769	6.562	4.889	NA	3.143	4.647	304 seminal receptacle
FBgn0031497	96.333	90.5	92.167	NA	NA	NA	304 parovaria
FBgn0034734	NA	NA	NA	5	NA	4.5	307 parovaria
FBgn0263241	NA	NA	NA	19.231	102.133	16.643	307 seminal receptacle
FBgn0032224	NA	NA	NA	28.231	11.333	10.909	307 parovaria
FBgn0032451	NA	NA	NA	59.286	43	49.714	307 parovaria
FBgn0034439	NA	NA	NA	NA	NA	12.625	307 spermatheca
FBgn0034295	NA	NA	NA	26.333	309.8	291.6	307 seminal receptacle
FBgn0016978	11.214	8.818	NA	NA	NA	NA	304 parovaria
FBgn0000008	NA	NA	NA	NA	NA	22.167	307 spermatheca
FBgn0011274	NA	6.625	NA	9	8.368	17.7	307 spermatheca
FBgn0262103	5.448	3.167	10.4	NA	NA	NA	304 spermatheca
FBgn0265276	NA	6.8	NA	8.8	NA	NA	307 parovaria
FBgn0034454	NA	NA	NA	15.6	NA	NA	307 parovaria
FBgn0053523	NA	NA	NA	88.167	81.889	65.778	307 parovaria
FBgn0031633	64.5	84.727	68.091	NA	NA	NA	304 seminal receptacle
FBgn0034975	4	NA	5.6	NA	NA	NA	304 spermatheca
FBgn0000477	NA	NA	NA	120	23.5	49.167	307 parovaria
FBgn0261862	79.571	19.286	18.615	NA	NA	NA	304 parovaria
FBgn0040322	9.833	33.375	NA	NA	NA	NA	304 seminal receptacle
FBgn0010015	NA	22.833	NA	4.5	25.167	NA	307 seminal receptacle
FBgn0035827	32.909	42.286	37.667	NA	NA	NA	304 seminal receptacle
FBgn0039223	13.769	23.75	13	NA	NA	NA	304 seminal receptacle
FBgn0032036	NA	NA	NA	24.5	28	25.077	307 seminal receptacle
FBgn0262527	9.091	6.429	5.7	NA	NA	NA	304 parovaria
FBgn0284257	NA	NA	NA	49.143	101	138	307 spermatheca
FBgn0287775	NA	NA	NA	NA	6.727	NA	307 seminal receptacle
FBgn0262476	NA	17.8	NA	5	24.263	5.167	307 seminal receptacle
FBgn0004858	NA	NA	NA	NA	NA	12.429	307 spermatheca
FBgn0036579	NA	17.167	10.167	NA	NA	NA	304 seminal receptacle
FBgn0023172	5.6	6.5	7.6	13.714	29.1	17.5	307 seminal receptacle
FBgn0038353	NA	NA	NA	NA	NA	260.714	307 spermatheca
FBgn0040273	19.321	12.385	12.963	NA	NA	NA	304 parovaria
FBgn0027835	37.385	16.857	36.231	NA	NA	NA	304 parovaria
FBgn0264895	NA	NA	NA	7.5	6.643	5.917	307 parovaria
FBgn0032208	NA	NA	NA	10.889	7.5	11.455	307 spermatheca
FBgn0031902	NA	5.778	NA	NA	NA	NA	304 seminal receptacle
FBgn0265045	17.105	6.948	6.857	NA	NA	NA	304 parovaria
FBgn0036107	NA	NA	NA	23.429	38.286	19.286	307 seminal receptacle
FBgn0260860	NA	NA	NA	24.538	51.231	34.692	307 seminal receptacle
FBgn0266084	NA	NA	NA	4.091	10.091	15.286	307 spermatheca
FBgn0286785	NA	NA	NA	NA	NA	13.667	307 spermatheca
FBgn0260745	NA	NA	NA	4.2	NA	NA	307 parovaria
FBgn0028980	NA	NA	NA	19.667	17	16.875	307 parovaria
FBgn0034346	11.188	8.556	9.824	NA	NA	NA	304 parovaria
FBgn0005616	NA	NA	NA	4.714	4	6.667	307 spermatheca
FBgn0283427	24.615	15.24	15.136	NA	NA	NA	304 parovaria
FBgn0036662	70.333	30.222	21	131.571	67.286	103	307 parovaria
FBgn0000565	NA	NA	NA	151.5	170.125	168	307 seminal receptacle
FBgn0002887	NA	NA	NA	4.375	NA	3.857	307 parovaria
FBgn0259237	NA	NA	NA	NA	NA	3.833	307 spermatheca
FBgn0001320	NA	11.429	NA	NA	NA	NA	304 seminal receptacle
FBgn0034243	NA	NA	NA	43.2	44.1	42.7	307 seminal receptacle
FBgn0039767	NA	NA	NA	102.25	65.85	76.9	307 parovaria
FBgn0259682	36.259	14.074	4.625	203.815	69.769	41	307 parovaria
FBgn0052062	NA	NA	NA	3.6	NA	NA	307 parovaria
FBgn0050195	NA	29.429	NA	NA	26.4	NA	304 seminal receptacle
FBgn0038312	NA	NA	NA	20.9	8.8	17.8	307 parovaria
FBgn0033742	NA	NA	NA	6.688	NA	5.389	307 parovaria
FBgn0039861	5	NA	NA	NA	NA	NA	304 parovaria
FBgn0034611	63.591	38.619	53.737	NA	NA	NA	304 parovaria
FBgn0261710	NA	NA	NA	7.167	9.167	7.429	307 seminal receptacle
FBgn0036449	NA	NA	NA	55.571	13.143	13	307 parovaria
FBgn0037794	8.333	8.875	6.111	NA	NA	NA	304 seminal receptacle
FBgn0283500	NA	NA	NA	22.167	41.5	31.333	307 seminal receptacle
FBgn0038256	NA	NA	NA	14.5	NA	12.333	307 parovaria
FBgn0050395	NA	NA	NA	4.667	NA	NA	307 parovaria
FBgn0020762	6.4	5.176	9	NA	NA	NA	304 spermatheca
FBgn0288232	42.222	8.2	NA	NA	NA	NA	304 parovaria
FBgn0039427	NA	10.8	NA	NA	NA	NA	304 seminal receptacle
FBgn0036302	11.308	19.917	8.231	NA	NA	NA	304 seminal receptacle
FBgn0039737	109.6	75.8	72.6	230	178.6	196.2	307 parovaria
FBgn0037963	NA	NA	13.091	NA	NA	NA	304 spermatheca
FBgn0034084	NA	NA	NA	10.143	16	18.143	307 spermatheca
FBgn0250786	6.5	6.583	6.2	NA	NA	NA	304 seminal receptacle
FBgn0086676	15.769	17.263	10.2	NA	NA	NA	304 seminal receptacle
FBgn0026376	NA	48.692	20.75	NA	57.818	61.625	307 spermatheca
FBgn0015277	NA	NA	NA	24.647	18.647	37.562	307 spermatheca
FBgn0035309	NA	NA	NA	NA	4.692	4.5	307 seminal receptacle
FBgn0263396	34.286	27.75	28.5	NA	NA	NA	304 parovaria
FBgn0039831	NA	NA	NA	21.625	30.5	27.625	307 seminal receptacle
FBgn0034072	5.25	6.938	7.1	4.462	7.833	18.048	307 spermatheca
FBgn0000289	18.833	14.333	13.667	NA	NA	NA	304 parovaria
FBgn0050389	7	5.833	NA	NA	NA	NA	304 parovaria
FBgn0026309	4.25	5.5	3.833	NA	NA	NA	304 seminal receptacle
FBgn0037719	NA	NA	NA	33.833	31.833	35.333	307 spermatheca
FBgn0027492	15	23.667	13	NA	NA	NA	304 seminal receptacle
FBgn0262955	15.586	9.607	12.222	30.654	26.042	33.296	307 spermatheca
FBgn0041181	4.692	20.174	5.375	NA	11.6	12.2	304 seminal receptacle
FBgn0038349	NA	NA	NA	63.615	98.143	113.714	307 spermatheca
FBgn0263110	4.4	NA	NA	4.9	NA	NA	307 parovaria
FBgn0035766	9.167	7.727	7.579	26.182	24.909	29.818	307 spermatheca
FBgn0039668	NA	NA	NA	25	17.6	33.4	307 spermatheca
FBgn0034113	NA	NA	NA	4.385	7.6	6.2	307 seminal receptacle
FBgn0028538	NA	NA	NA	9	6.125	8.182	307 parovaria
FBgn0051344	8.429	NA	NA	NA	NA	NA	304 parovaria
FBgn0003278	NA	NA	NA	4.857	3.167	5.75	307 spermatheca
FBgn0261020	31.545	22.636	29.818	NA	NA	NA	304 parovaria
FBgn0035953	NA	NA	NA	8.833	11.636	14.636	307 spermatheca
FBgn0028487	25.143	12.286	9.2	NA	NA	NA	304 parovaria
FBgn0031869	NA	3.333	NA	NA	NA	NA	304 seminal receptacle
FBgn0024558	64.2	76.4	NA	140	118.4	NA	307 parovaria
FBgn0036727	NA	NA	NA	NA	97.833	NA	307 seminal receptacle
FBgn0036493	NA	NA	6.3	6.571	NA	35.043	307 spermatheca
FBgn0033760	NA	NA	NA	3.333	3.333	5.333	307 spermatheca
FBgn0038473	NA	NA	NA	61.222	42.667	47.375	307 parovaria
FBgn0037796	16.167	73.667	17.167	NA	NA	NA	304 seminal receptacle
FBgn0001316	5.538	15.458	6.167	NA	NA	NA	304 seminal receptacle
FBgn0035060	7	7.6	NA	NA	NA	NA	304 seminal receptacle
FBgn0001297	NA	NA	NA	7	34.1	15.667	307 seminal receptacle
FBgn0033379	23	34	15.286	NA	NA	NA	304 seminal receptacle
FBgn0034631	6.808	5.48	3.714	9.5	4.938	11.148	307 spermatheca
FBgn0264693	12.6	NA	NA	NA	NA	NA	304 parovaria
FBgn0261286	5.778	7.222	NA	NA	NA	NA	304 seminal receptacle
FBgn0033913	5.688	NA	NA	NA	NA	NA	304 parovaria
FBgn0027497	NA	NA	NA	11.571	16	60.286	307 spermatheca
FBgn0004893	NA	NA	NA	NA	8	8.125	307 spermatheca
FBgn0086706	NA	NA	NA	227	197.167	223.5	307 parovaria
FBgn0086253	15.167	10.263	13	NA	NA	NA	304 parovaria
FBgn0034988	NA	NA	NA	37.6	36.2	45	307 spermatheca
FBgn0287204	51.917	18.381	28.045	NA	NA	NA	304 parovaria
FBgn0262160	4	7.846	NA	21.321	18.077	12.737	307 parovaria
FBgn0032796	4.818	NA	4.588	NA	NA	NA	304 parovaria
FBgn0031745	NA	94.111	45.333	NA	NA	NA	304 seminal receptacle
FBgn0023001	NA	NA	NA	10.632	5.529	16.333	307 spermatheca
FBgn0033710	7.167	7.4	NA	8.545	4.333	5.267	307 parovaria
FBgn0011774	9.786	9.714	6.077	NA	NA	NA	304 parovaria
FBgn0032156	NA	NA	NA	82.143	87.143	119.429	307 spermatheca
FBgn0042129	7.615	NA	NA	NA	NA	NA	304 parovaria
FBgn0050431	23.143	8.4	NA	NA	NA	NA	304 parovaria
FBgn0015513	9.846	9.8	6.217	NA	NA	NA	304 parovaria
FBgn0035150	6.444	7	4.667	NA	NA	NA	304 seminal receptacle
FBgn0026593	NA	NA	NA	26.273	NA	NA	307 parovaria
FBgn0035244	NA	NA	NA	9.042	10.227	17.52	307 spermatheca
FBgn0266671	21.167	14.429	12.444	NA	NA	NA	304 parovaria
FBgn0003890	79.667	51.5	61.4	NA	NA	NA	304 parovaria
FBgn0031879	3	4.952	NA	NA	NA	NA	304 seminal receptacle
FBgn0033212	NA	NA	NA	4.167	11	8.667	307 seminal receptacle
FBgn0086443	NA	NA	NA	31.778	34.818	55.583	307 spermatheca
FBgn0263106	NA	NA	NA	86.875	78	NA	307 parovaria
FBgn0035688	NA	NA	NA	9.143	10.25	14.875	307 spermatheca
FBgn0026079	NA	NA	NA	48	17.417	45.25	307 parovaria
FBgn0044452	NA	NA	NA	7.435	4.867	11.188	307 spermatheca
FBgn0015000	18.105	26.842	15.789	NA	NA	NA	304 seminal receptacle
FBgn0037592	17.333	NA	12.2	NA	NA	NA	304 parovaria
FBgn0038964	NA	NA	NA	218.333	141.083	119.917	307 parovaria
FBgn0034693	NA	12	NA	NA	8.111	5.8	304 seminal receptacle
FBgn0032000	NA	NA	NA	129.8	129	127.8	307 parovaria
FBgn0046296	NA	NA	NA	48.8	NA	39.8	307 parovaria
FBgn0038601	12.182	25.636	9.273	NA	NA	NA	304 seminal receptacle
FBgn0266417	NA	10.333	NA	NA	NA	NA	304 seminal receptacle
FBgn0027585	6.2	NA	11.6	8.2	10.091	24.636	307 spermatheca
FBgn0025725	52.125	28.75	37.125	71.652	46.913	75.87	307 spermatheca
FBgn0034200	98.929	15.9	NA	NA	NA	NA	304 parovaria
FBgn0039761	NA	NA	NA	NA	5.4	14.25	307 spermatheca
FBgn0264560	14.947	10.167	10.947	NA	NA	NA	304 parovaria
FBgn0035148	NA	NA	NA	NA	35.8	19.4	307 seminal receptacle
FBgn0000083	105	57.333	72.75	NA	NA	NA	304 parovaria
FBgn0042083	19.5	21.636	11.909	NA	NA	NA	304 seminal receptacle
FBgn0034067	13.077	29.786	5.273	NA	NA	NA	304 seminal receptacle
FBgn0027080	27.9	25.556	16.778	NA	NA	NA	304 parovaria
FBgn0011289	55.143	27.429	24.857	NA	NA	NA	304 parovaria
FBgn0085405	21.286	8.625	4	NA	NA	NA	304 parovaria
FBgn0028648	NA	NA	NA	73.5	81	55.375	307 seminal receptacle
FBgn0034956	NA	NA	NA	NA	8	NA	307 seminal receptacle
FBgn0034307	7.833	9	NA	NA	NA	NA	304 seminal receptacle
FBgn0031589	14	10.308	5.941	29.56	8.8	10.739	307 parovaria
FBgn0264357	16.818	34.364	17.909	17.81	36.478	25.75	307 seminal receptacle
FBgn0052133	NA	NA	NA	NA	NA	4.375	307 spermatheca
FBgn0010238	NA	NA	NA	NA	130.5	67.667	307 seminal receptacle
FBgn0027529	NA	NA	NA	18.529	18.059	29.647	307 spermatheca
FBgn0028429	NA	NA	NA	70.091	60.1	68.625	307 parovaria
FBgn0034075	6.2	20.13	5.583	16.333	37.077	14.833	307 seminal receptacle
FBgn0036318	122.7	151.3	100.4	NA	NA	NA	304 seminal receptacle
FBgn0026181	NA	NA	NA	7.833	10.5	16.667	307 spermatheca
FBgn0022987	NA	4.75	NA	NA	NA	NA	304 seminal receptacle
FBgn0034432	84.667	71.467	32.571	187.842	159	139.056	307 parovaria
FBgn0035390	NA	NA	NA	50.308	122.231	84	307 seminal receptacle
FBgn0036133	23.526	24	11.278	33.619	60.952	36.762	307 seminal receptacle
FBgn0036547	30.462	14.846	3.6	NA	NA	NA	304 parovaria
FBgn0034797	NA	NA	NA	7.857	5.25	5	307 parovaria
FBgn0039875	88.167	59.333	56.833	NA	NA	NA	304 parovaria
FBgn0027091	38.458	16.545	12.286	42.625	23.375	50.875	307 spermatheca
FBgn0025684	69.273	46.364	44.455	NA	NA	NA	304 parovaria
FBgn0031379	26.833	21.667	14.167	30.111	27.5	28.625	307 parovaria
FBgn0028490	35.231	35.1	17.143	25.8	NA	NA	304 parovaria
FBgn0034733	8.95	NA	6.5	11.364	6.455	7.727	307 parovaria
FBgn0000244	NA	NA	NA	37.125	55.857	49.667	307 seminal receptacle
FBgn0039590	NA	NA	NA	NA	4.625	4.909	307 spermatheca
FBgn0037819	NA	NA	NA	159.7	102.8	64.4	307 parovaria
FBgn0085384	NA	43	NA	NA	NA	NA	304 seminal receptacle
FBgn0036684	NA	NA	NA	NA	NA	3.333	307 spermatheca
FBgn0035532	84.444	36.667	20.333	NA	NA	NA	304 parovaria
FBgn0036801	3.8	NA	NA	NA	NA	NA	304 parovaria
FBgn0034417	NA	NA	NA	7.091	18.667	35.538	307 spermatheca
FBgn0030869	NA	NA	NA	19.929	28.071	24.467	307 seminal receptacle
FBgn0041630	5.733	NA	NA	23.125	31.385	25.786	307 seminal receptacle
FBgn0039559	8.8	NA	NA	NA	NA	NA	304 parovaria
FBgn0011207	NA	NA	NA	30.214	17.214	30.5	307 spermatheca
FBgn0039210	5.111	4.944	4.167	NA	NA	NA	304 parovaria
FBgn0016715	24	7.5	NA	29.2	NA	15.2	307 parovaria
FBgn0020312	13.278	5.727	6.733	NA	NA	NA	304 parovaria
FBgn0003041	NA	NA	NA	10	24.895	5.467	307 seminal receptacle
FBgn0037533	138.4	129.4	63.6	NA	NA	NA	304 parovaria
FBgn0029147	9	166.25	NA	NA	NA	NA	304 seminal receptacle
FBgn0024273	5.333	5.2	NA	9.875	12.875	18.875	307 spermatheca
FBgn0028841	34.714	191.545	68.929	52.643	NA	4.571	304 seminal receptacle
FBgn0265998	NA	6.2	NA	NA	NA	NA	304 seminal receptacle
FBgn0036105	NA	NA	NA	NA	NA	42.333	307 spermatheca
FBgn0036827	NA	4.8	NA	NA	NA	NA	304 seminal receptacle
FBgn0031573	NA	NA	NA	3.545	4.889	NA	307 seminal receptacle
FBgn0032819	7.429	13.333	6.357	NA	NA	NA	304 seminal receptacle
FBgn0036773	98.4	29.556	87.636	105.429	31.286	76.75	307 parovaria
FBgn0026479	17.909	27.25	16.091	13.667	15	11.842	304 seminal receptacle
FBgn0028434	NA	NA	NA	4	9.727	8.929	307 seminal receptacle
FBgn0261119	41.8	44.8	28.2	NA	NA	NA	304 seminal receptacle
FBgn0034380	6.476	8.619	7.217	14.778	12.167	14.5	307 parovaria
FBgn0038948	7.833	17.429	21.167	26	31.4	18.2	307 seminal receptacle
FBgn0053113	77.111	98.667	78.889	NA	NA	NA	304 seminal receptacle
FBgn0284221	5.667	5.5	4.444	NA	NA	NA	304 parovaria
FBgn0053556	NA	7	NA	NA	NA	NA	304 seminal receptacle
FBgn0023095	NA	NA	NA	33.2	54.471	45.4	307 seminal receptacle
FBgn0034939	9.545	6.769	9.222	NA	NA	NA	304 parovaria
FBgn0053519	NA	6.75	NA	NA	9.762	NA	307 seminal receptacle
FBgn0036157	15.8	NA	NA	137.429	41.167	43.333	307 parovaria
FBgn0041182	40.875	118.162	14.355	NA	NA	NA	304 seminal receptacle
FBgn0003292	NA	NA	NA	6.8	4.4	NA	307 parovaria
FBgn0042134	9.857	11.286	10.143	NA	NA	NA	304 seminal receptacle
FBgn0025519	22.8	14.333	16.7	16	25.25	29.375	307 spermatheca
FBgn0034727	27.111	35.2	20.9	NA	NA	NA	304 seminal receptacle
FBgn0083969	7.533	17.8	3.909	NA	NA	NA	304 seminal receptacle
FBgn0036144	NA	NA	NA	6.375	9	73.167	307 spermatheca
FBgn0032330	NA	NA	NA	4.875	3.8	5.429	307 spermatheca
FBgn0051040	NA	NA	NA	42.333	29.667	39.111	307 parovaria
FBgn0004509	7	27.2	6.2	NA	NA	NA	304 seminal receptacle
FBgn0034180	12.476	14.762	10.75	NA	NA	NA	304 seminal receptacle
FBgn0036556	NA	NA	NA	15.5	21.5	21.375	307 seminal receptacle
FBgn0035268	NA	NA	NA	NA	NA	7.8	307 spermatheca
FBgn0027655	NA	NA	NA	4.833	7.364	5.421	307 seminal receptacle
FBgn0021872	NA	NA	NA	203.455	164.364	177.455	307 parovaria
FBgn0036299	43.444	56.154	32.692	78.947	136.158	173.105	307 spermatheca
FBgn0085427	NA	NA	NA	10.8	6.571	3.8	307 parovaria
FBgn0259481	NA	NA	NA	NA	127.4	133.167	307 spermatheca
FBgn0261552	NA	NA	NA	95.6	72.4	87	307 parovaria
FBgn0039602	NA	NA	NA	6.407	6.947	5.81	307 seminal receptacle
FBgn0011230	7.476	9.278	13.692	13.389	13.105	22.6	307 spermatheca
FBgn0036614	NA	NA	NA	9.2	6.25	11.4	307 spermatheca
FBgn0262524	NA	NA	NA	9.143	7.429	7.333	307 parovaria
FBgn0039800	106.909	76.3	69.364	NA	NA	NA	304 parovaria
FBgn0033738	NA	NA	NA	NA	7.167	8.2	307 spermatheca
FBgn0025525	4.889	9.056	3.222	NA	NA	NA	304 seminal receptacle
FBgn0038890	NA	NA	NA	NA	3.571	5.818	307 spermatheca
FBgn0267408	NA	NA	NA	74.143	77.286	63.714	307 seminal receptacle
FBgn0033302	NA	NA	NA	26.3	NA	226.4	307 spermatheca
FBgn0263352	NA	NA	NA	21.25	21.909	20.583	307 seminal receptacle
FBgn0038488	5.429	6	3.6	NA	NA	NA	304 seminal receptacle
FBgn0029155	17.846	68.571	4.556	NA	NA	NA	304 seminal receptacle
FBgn0250908	NA	82.955	NA	NA	NA	NA	304 seminal receptacle
FBgn0263077	5.2	7.6	NA	NA	9.571	5	307 seminal receptacle
FBgn0033889	11.667	9.765	6.421	9.579	11.389	15.45	307 spermatheca
FBgn0020251	4.529	7.541	3.9	13.214	11.467	18.067	307 spermatheca
FBgn0027932	NA	NA	NA	133.438	58.438	100.062	307 parovaria
FBgn0037924	4.444	4	3.857	NA	NA	NA	304 parovaria
FBgn0035165	53.273	66.5	30.5	44.222	60.091	46.091	304 seminal receptacle
FBgn0031285	NA	NA	NA	11	30.8	14.6	307 seminal receptacle
FBgn0086906	3.857	12.86	4.778	4.591	9.944	4.644	304 seminal receptacle
FBgn0027535	5.846	6.2	3.833	16.682	12.091	11.045	307 parovaria
FBgn0034275	4.571	31.077	6.182	NA	NA	NA	304 seminal receptacle
FBgn0031635	14.714	8.357	11.429	NA	NA	NA	304 parovaria
FBgn0026427	NA	NA	NA	5.25	4	5.933	307 spermatheca
FBgn0034854	16.2	15.7	10.778	NA	NA	NA	304 parovaria
FBgn0040308	NA	NA	NA	114.667	41.714	143.125	307 spermatheca
FBgn0043884	7.167	6.2	11	NA	NA	NA	304 spermatheca
FBgn0037705	NA	NA	NA	NA	NA	15.6	307 spermatheca
FBgn0086707	NA	NA	NA	12.667	6.667	20.083	307 spermatheca
FBgn0036043	NA	NA	NA	NA	23	6.769	307 seminal receptacle
FBgn0039809	NA	4.6	NA	NA	NA	NA	304 seminal receptacle
FBgn0010808	NA	NA	NA	202	215.571	211.286	307 seminal receptacle
FBgn0034009	5.286	9.571	NA	NA	NA	NA	304 seminal receptacle
FBgn0029506	NA	NA	NA	140.8	134.778	214	307 spermatheca
FBgn0031857	NA	5.303	NA	NA	9.524	3.4	307 seminal receptacle
FBgn0028970	43.533	47.133	37.75	NA	NA	NA	304 seminal receptacle
FBgn0011828	NA	14.842	NA	NA	NA	NA	304 seminal receptacle
FBgn0003308	NA	NA	NA	12.286	NA	NA	307 parovaria
FBgn0020278	NA	NA	NA	13.769	19.667	NA	307 seminal receptacle
FBgn0039508	4.444	7.444	7.375	NA	NA	NA	304 seminal receptacle
FBgn0031608	4.429	4.286	3.8	NA	NA	NA	304 parovaria
FBgn0001296	NA	15	NA	NA	NA	NA	304 seminal receptacle
FBgn0262519	NA	NA	NA	8.833	8.167	13.167	307 spermatheca
FBgn0010052	5.545	NA	39.231	NA	NA	NA	304 spermatheca
FBgn0026418	15.833	NA	NA	NA	NA	NA	304 parovaria
FBgn0036448	NA	NA	NA	6.056	7.886	10.579	307 spermatheca
FBgn0032763	NA	4.167	NA	NA	NA	NA	304 seminal receptacle
FBgn0036208	35	15	NA	NA	NA	NA	304 parovaria
FBgn0022764	NA	NA	NA	NA	NA	4.111	307 spermatheca
FBgn0033763	NA	NA	NA	NA	29.727	NA	307 seminal receptacle
FBgn0034253	NA	NA	NA	NA	17.826	4.286	307 seminal receptacle
FBgn0027094	NA	NA	NA	44.455	11	37.818	307 parovaria
FBgn0040283	4.6	6.4	NA	NA	NA	NA	304 seminal receptacle
FBgn0051223	NA	NA	NA	4.714	NA	5.2	307 spermatheca
FBgn0003279	NA	NA	NA	NA	NA	5.2	307 spermatheca
FBgn0034087	3.6	4.2	NA	9.083	6.167	7	307 parovaria
FBgn0025681	4.467	5.955	NA	NA	NA	NA	304 seminal receptacle
FBgn0038679	NA	NA	NA	9.2	7	13.667	307 spermatheca
FBgn0261276	NA	21.2	NA	NA	NA	NA	304 seminal receptacle
FBgn0039696	7.789	4.118	NA	NA	NA	NA	304 parovaria
FBgn0035798	NA	NA	NA	19.909	149	23.7	307 seminal receptacle
FBgn0034400	4.833	5.667	5	NA	NA	NA	304 seminal receptacle
FBgn0036106	24.643	177	47.706	91.929	227.056	187.812	307 seminal receptacle
FBgn0025595	NA	NA	NA	41.571	4.4	NA	307 parovaria
FBgn0035574	NA	5.667	NA	NA	9.6	NA	307 seminal receptacle
FBgn0038348	NA	NA	NA	NA	4.167	NA	307 seminal receptacle
FBgn0038181	12.192	113.154	6.818	29.6	141.182	40.5	307 seminal receptacle
FBgn0019938	NA	4.333	NA	8.312	4	7.933	307 parovaria
FBgn0035283	7.5	11.5	NA	NA	NA	NA	304 seminal receptacle
FBgn0033926	127.875	115.875	127.125	NA	NA	NA	304 parovaria
FBgn0035308	NA	NA	NA	4.6	4	10.5	307 spermatheca
FBgn0034354	24.429	22.75	50.857	34.471	21.143	64.647	307 spermatheca
FBgn0016696	18.2	18	12.8	NA	NA	NA	304 parovaria
FBgn0032733	NA	NA	NA	NA	4.625	5.6	307 spermatheca
FBgn0283503	NA	NA	NA	NA	NA	5	307 spermatheca
FBgn0004606	NA	8.25	NA	4.429	12.316	NA	307 seminal receptacle
FBgn0037623	NA	NA	NA	5	5.5	7.125	307 spermatheca
FBgn0285963	8.6	81.4	19.7	NA	NA	NA	304 seminal receptacle
FBgn0004390	NA	NA	NA	NA	6.125	5.833	307 seminal receptacle
FBgn0034223	NA	NA	NA	3.083	8.647	4.286	307 seminal receptacle
FBgn0020503	20.667	30.143	NA	15	14.857	22	304 seminal receptacle
FBgn0031305	147.706	34.167	41.083	29.444	NA	10.444	304 parovaria
FBgn0034271	11.875	16.062	7.692	8.846	20.647	19.4	307 seminal receptacle
FBgn0041585	30.364	45.107	19.929	NA	28.3	10.167	304 seminal receptacle
FBgn0034258	31.385	15.692	22	NA	NA	NA	304 parovaria
FBgn0010877	NA	NA	NA	21.037	25.852	17.63	307 seminal receptacle
FBgn0011260	NA	NA	NA	NA	36.875	NA	307 seminal receptacle
FBgn0038829	NA	NA	NA	46.2	55.25	55.2	307 seminal receptacle
FBgn0002775	NA	NA	NA	24.182	25.455	29.636	307 spermatheca
FBgn0033821	62.6	NA	NA	NA	NA	NA	304 parovaria
FBgn0000422	NA	NA	NA	NA	30.5	8.714	307 seminal receptacle
FBgn0032032	NA	NA	NA	15.167	23.2	13.2	307 seminal receptacle
FBgn0032178	NA	NA	NA	NA	20.143	NA	307 seminal receptacle
FBgn0038079	NA	29.833	NA	NA	NA	NA	304 seminal receptacle
FBgn0028530	NA	NA	NA	NA	6.444	12.667	307 spermatheca
FBgn0050272	NA	NA	NA	NA	NA	8	307 spermatheca
FBgn0034237	90.364	74.667	78.889	NA	NA	NA	304 parovaria
FBgn0264490	NA	NA	NA	11.1	4.5	10.5	307 parovaria
FBgn0038984	NA	NA	NA	234.8	209.4	192.4	307 parovaria
FBgn0031392	NA	NA	6.4	NA	NA	NA	304 spermatheca
FBgn0036141	8.083	17.917	NA	20.143	34.667	25.714	307 seminal receptacle
FBgn0039766	NA	NA	NA	15.818	36.455	35.364	307 seminal receptacle
FBgn0027503	8.333	5	NA	NA	NA	NA	304 parovaria
FBgn0031313	NA	NA	NA	18	24	NA	307 seminal receptacle
FBgn0036666	NA	NA	NA	82.143	67.714	63.143	307 parovaria
FBgn0028542	NA	NA	NA	8.143	16.286	7.286	307 seminal receptacle
FBgn0038972	92.455	125.182	48.455	NA	NA	NA	304 seminal receptacle
FBgn0010452	NA	NA	NA	NA	NA	8.5	307 spermatheca
FBgn0034394	162.667	79.462	18.125	NA	NA	NA	304 parovaria
FBgn0032378	NA	NA	NA	11.9	12.3	16.8	307 spermatheca
FBgn0034951	NA	NA	NA	53.5	54.333	21.833	307 seminal receptacle
FBgn0028983	112.625	95.556	28.625	NA	NA	NA	304 parovaria
FBgn0036059	NA	NA	NA	110	119.2	153.5	307 spermatheca
FBgn0029118	29.167	25.25	24.667	NA	NA	NA	304 parovaria
FBgn0035247	NA	NA	NA	13.462	27.143	26.923	307 seminal receptacle
FBgn0039562	82.8	108.8	123.733	NA	NA	NA	304 spermatheca
FBgn0034085	23.636	NA	22.424	NA	NA	NA	304 parovaria
FBgn0001308	50.071	59.714	33.714	NA	NA	NA	304 seminal receptacle
FBgn0261822	36	64	22.667	NA	NA	NA	304 seminal receptacle
FBgn0026239	NA	NA	NA	13.222	NA	12.875	307 parovaria
FBgn0260632	16.857	25.238	6.333	NA	NA	NA	304 seminal receptacle
FBgn0053196	9.4	12.271	8.2	NA	NA	NA	304 seminal receptacle
FBgn0024315	NA	NA	NA	116.214	103.714	125.071	307 spermatheca
FBgn0052262	17.5	15.5	10	NA	NA	NA	304 parovaria
FBgn0036124	NA	NA	NA	14.429	10.316	12.81	307 parovaria
FBgn0010520	NA	NA	NA	50	22.429	26.625	307 parovaria
FBgn0010226	35.2	NA	NA	NA	NA	NA	304 parovaria
FBgn0003162	NA	NA	NA	27.444	17.222	61.444	307 spermatheca
FBgn0005596	NA	NA	3.222	NA	NA	NA	304 spermatheca
FBgn0001108	NA	NA	NA	12	14.538	21.667	307 spermatheca
FBgn0036842	12.571	10	NA	NA	NA	NA	304 parovaria
FBgn0034490	NA	34.833	65.667	NA	NA	NA	304 spermatheca
FBgn0039348	103.667	112.8	44.556	NA	NA	NA	304 seminal receptacle
FBgn0033904	NA	NA	NA	11	NA	7.6	307 parovaria
FBgn0015035	NA	NA	NA	4.842	NA	4	307 parovaria
FBgn0003731	NA	NA	NA	17.333	8.545	9.263	307 parovaria
FBgn0037838	NA	NA	NA	8	44	6.875	307 seminal receptacle
FBgn0015477	NA	NA	NA	5.333	NA	9	307 spermatheca
FBgn0285955	3.4	6.545	NA	NA	NA	NA	304 seminal receptacle
FBgn0011692	NA	NA	NA	5.75	4	NA	307 parovaria
FBgn0039776	NA	NA	NA	132.923	177.25	234.25	307 spermatheca
FBgn0267351	3.333	3.714	NA	NA	NA	NA	304 seminal receptacle
FBgn0033236	NA	NA	NA	5.2	7.857	27.25	307 spermatheca
FBgn0035337	NA	NA	NA	11.333	14.667	21	307 spermatheca
FBgn0041582	NA	NA	NA	NA	11	3.8	307 seminal receptacle
FBgn0035358	10.273	4.167	NA	NA	NA	NA	304 parovaria
FBgn0034304	NA	20.636	8.8	NA	NA	NA	304 seminal receptacle
FBgn0263930	NA	NA	NA	27.294	49.211	42.059	307 seminal receptacle
FBgn0261065	NA	NA	NA	37.214	35	38.538	307 spermatheca
FBgn0034933	NA	14.625	NA	NA	NA	NA	304 seminal receptacle
FBgn0262733	NA	NA	NA	13.125	14.824	15.706	307 spermatheca
FBgn0039688	NA	4	NA	NA	NA	NA	304 seminal receptacle
FBgn0052267	NA	NA	NA	58.571	15.429	28.571	307 parovaria
FBgn0027079	17.741	17.885	14.577	NA	NA	NA	304 seminal receptacle
FBgn0286828	NA	NA	NA	29.944	30.5	34.5	307 spermatheca
FBgn0031996	105.111	72.111	86.667	150.333	89	132.889	307 parovaria
FBgn0086895	NA	NA	NA	3.333	NA	NA	307 parovaria
FBgn0039829	NA	NA	NA	14.4	NA	14.6	307 spermatheca
FBgn0037897	5.5	NA	NA	NA	NA	NA	304 parovaria
FBgn0034879	NA	NA	NA	70.333	47.5	47.5	307 parovaria
FBgn0035402	9	7.667	6.286	NA	NA	NA	304 parovaria
FBgn0032465	NA	NA	NA	49	24.4	60	307 spermatheca
FBgn0036770	NA	NA	NA	8	NA	NA	307 parovaria
FBgn0262579	NA	NA	NA	7.6	15.75	NA	307 seminal receptacle
FBgn0052082	NA	NA	NA	16.167	NA	8.917	307 parovaria
FBgn0287774	NA	NA	NA	27.727	17.4	31.4	307 spermatheca
FBgn0033250	16	NA	NA	NA	NA	NA	304 parovaria
FBgn0031895	NA	NA	NA	5.143	NA	NA	307 parovaria
FBgn0051436	18.529	29.5	12.778	NA	NA	NA	304 seminal receptacle
FBgn0034883	NA	NA	NA	21.333	42	27.636	307 seminal receptacle
FBgn0003862	NA	NA	NA	7.25	5.333	10.737	307 spermatheca
FBgn0034265	NA	29	NA	NA	NA	NA	304 seminal receptacle
FBgn0003137	NA	28.44	NA	NA	NA	NA	304 seminal receptacle
FBgn0264894	11	57.909	6.333	12.6	29.5	13.2	304 seminal receptacle
FBgn0035375	NA	NA	NA	43.316	11.053	66	307 spermatheca
FBgn0032603	5.125	4.714	NA	10	7.818	6.778	307 parovaria
FBgn0032031	NA	NA	NA	21.556	16.5	20.118	307 parovaria
FBgn0032822	9	10.8	12.4	NA	NA	NA	304 spermatheca
FBgn0038586	NA	NA	NA	21.231	36.917	25.846	307 seminal receptacle
FBgn0003520	6.182	10.692	7.8	NA	NA	NA	304 seminal receptacle
FBgn0037979	9.769	11.714	9.5	NA	NA	NA	304 seminal receptacle
FBgn0034141	NA	NA	NA	35.917	30.467	34.786	307 parovaria
FBgn0035871	15.6	NA	NA	NA	NA	NA	304 parovaria
FBgn0263395	4.714	3.923	NA	NA	NA	13.4	307 spermatheca
FBgn0032138	NA	NA	NA	102.04	29.48	43.88	307 parovaria
FBgn0061492	NA	NA	NA	167.091	195.091	202.182	307 spermatheca
FBgn0086757	23.667	17.333	11.833	17.333	28.833	20.167	307 seminal receptacle
FBgn0010909	NA	9.2	NA	NA	NA	NA	304 seminal receptacle
FBgn0261547	NA	NA	NA	6.562	NA	5.727	307 parovaria
FBgn0032435	NA	NA	NA	NA	NA	8.696	307 spermatheca
FBgn0034277	109.714	108.667	126.5	NA	NA	NA	304 spermatheca
FBgn0022787	4.842	5.2	5.625	NA	NA	NA	304 spermatheca
FBgn0015795	99.9	91.364	98.8	NA	NA	NA	304 parovaria
FBgn0040323	28.857	41.75	11	NA	NA	NA	304 seminal receptacle
FBgn0032596	NA	NA	NA	49.625	61.875	93	307 spermatheca
FBgn0036298	NA	NA	NA	61.889	28.875	62	307 spermatheca
FBgn0038424	8.833	12.4	NA	NA	NA	NA	304 seminal receptacle
FBgn0035590	NA	NA	NA	44.917	34.333	36.833	307 parovaria
FBgn0032773	NA	NA	NA	34	NA	14.833	307 parovaria
FBgn0024245	41.333	7	5.8	NA	NA	NA	304 parovaria
FBgn0263667	NA	NA	NA	5.333	4	5.636	307 spermatheca
FBgn0036240	NA	NA	NA	10.364	9.227	39.167	307 spermatheca
FBgn0017581	61.455	50.636	47.182	70.5	61.286	77.286	307 spermatheca
FBgn0004876	NA	NA	NA	22	10.615	29.259	307 spermatheca
FBgn0036518	NA	NA	NA	NA	5.4	13.8	307 spermatheca
FBgn0031855	NA	NA	NA	NA	21.1	NA	307 seminal receptacle
FBgn0033352	12.143	11.125	10.143	NA	NA	NA	304 parovaria
FBgn0261477	17.818	21.417	13.75	53.889	65	62.3	307 seminal receptacle
FBgn0050394	28.556	17	14.4	31.571	34.357	49.143	307 spermatheca
FBgn0036147	NA	NA	NA	66.222	41.889	NA	307 parovaria
FBgn0035534	16.571	28	21.571	NA	NA	NA	304 seminal receptacle
FBgn0016075	9.571	20.167	NA	NA	NA	NA	304 seminal receptacle
FBgn0038569	22.778	20.111	23.706	NA	NA	NA	304 spermatheca
FBgn0035383	23.783	17.043	9.381	NA	NA	NA	304 parovaria
FBgn0036663	NA	NA	NA	NA	5.2	8.176	307 spermatheca
FBgn0036372	NA	NA	NA	11.933	11.533	6.2	307 parovaria
FBgn0267488	7.857	NA	NA	11.692	19.818	30.083	307 spermatheca
FBgn0034398	NA	NA	NA	149.286	154.25	155	307 spermatheca
FBgn0038721	NA	NA	NA	NA	NA	5.778	307 spermatheca
FBgn0034689	25.077	35.571	23.667	NA	NA	NA	304 seminal receptacle
FBgn0037958	8.375	9.5	4.167	NA	NA	NA	304 seminal receptacle
FBgn0035490	NA	NA	NA	17.308	116.5	89.786	307 seminal receptacle
FBgn0260935	NA	NA	NA	6.125	6.25	8.25	307 spermatheca
FBgn0001978	NA	NA	NA	3.75	NA	3.75	307 parovaria
FBgn0038197	NA	NA	NA	14.5	6	9.667	307 parovaria
FBgn0034025	12.444	8.667	8.286	NA	NA	NA	304 parovaria
FBgn0261565	NA	20.231	NA	8.2	27.167	5.4	307 seminal receptacle
FBgn0032026	14.273	8.333	NA	NA	NA	NA	304 parovaria
FBgn0036279	5.857	15.286	38.857	11.308	30.5	173.214	307 spermatheca
FBgn0031562	NA	NA	NA	8.909	19.5	5.571	307 seminal receptacle
FBgn0004868	NA	NA	NA	105	66.7	87.333	307 parovaria
FBgn0033949	NA	NA	NA	15.125	84.375	NA	307 seminal receptacle
FBgn0035589	NA	NA	NA	61.167	59.5	NA	307 parovaria
FBgn0035145	7.8	7.385	5.308	7.867	4	7.5	307 parovaria
FBgn0034091	52.125	45.429	30.167	NA	NA	NA	304 parovaria
FBgn0004795	NA	NA	NA	72.889	98.444	99	307 spermatheca
FBgn0015949	NA	NA	NA	12.545	11	22.636	307 spermatheca
FBgn0033971	14.385	18	17.615	NA	NA	NA	304 seminal receptacle
FBgn0052103	NA	NA	NA	93.667	75.667	85.375	307 parovaria
FBgn0038250	NA	NA	NA	66.4	122.4	NA	307 seminal receptacle
FBgn0039628	NA	NA	NA	166.4	22	56	307 parovaria
FBgn0034735	NA	NA	NA	25.308	21	17.538	307 parovaria
FBgn0051158	NA	NA	NA	NA	5.889	NA	307 seminal receptacle
FBgn0033225	NA	NA	NA	12.667	18.667	26.667	307 spermatheca
FBgn0035591	4.8	3.667	NA	NA	NA	NA	304 parovaria
FBgn0087007	NA	NA	NA	29.6	NA	44.6	307 spermatheca
FBgn0036365	NA	NA	NA	4.25	27.5	6.643	307 seminal receptacle
FBgn0265991	NA	54.833	NA	NA	NA	NA	304 seminal receptacle
FBgn0034230	14.909	14.75	14.625	NA	NA	NA	304 parovaria
FBgn0020440	5.8	6.733	5.5	14.062	19.158	34.111	307 spermatheca
FBgn0287825	101	125.875	82.667	NA	NA	NA	304 seminal receptacle
FBgn0033187	NA	NA	NA	22	13	47.667	307 spermatheca
FBgn0038072	4.143	55.9	NA	NA	NA	NA	304 seminal receptacle
FBgn0025808	10.267	6.692	5.077	11.143	14.429	16.214	307 spermatheca
FBgn0039302	NA	6.4	NA	NA	NA	NA	304 seminal receptacle
FBgn0032387	NA	13.8	NA	NA	NA	NA	304 seminal receptacle
FBgn0034051	32.833	31.143	18.6	NA	NA	NA	304 parovaria
FBgn0035578	NA	6.714	NA	NA	NA	NA	304 seminal receptacle
FBgn0024921	NA	13.5	NA	NA	NA	NA	304 seminal receptacle
FBgn0033387	NA	14	NA	14.6	34.6	8.286	307 seminal receptacle
FBgn0034158	NA	NA	NA	12.857	21.286	17	307 seminal receptacle
FBgn0036288	22.778	10.875	17.125	40.1	16.95	50	307 spermatheca
FBgn0037720	NA	NA	NA	8.667	30.167	43.333	307 spermatheca
FBgn0034853	4.2	4.4	NA	NA	NA	NA	304 seminal receptacle
FBgn0036775	NA	NA	NA	19.125	20.75	21.75	307 spermatheca
FBgn0050115	NA	6.429	NA	NA	NA	NA	304 seminal receptacle
FBgn0034455	NA	NA	NA	70.067	83.188	50.471	307 seminal receptacle
FBgn0024194	27.286	18.857	22.857	NA	NA	NA	304 parovaria
FBgn0031549	NA	NA	NA	4.333	NA	NA	307 parovaria
FBgn0021979	NA	NA	NA	141.6	169.9	159.4	307 seminal receptacle
FBgn0020930	NA	NA	NA	21.556	51	42.6	307 seminal receptacle
FBgn0038686	NA	NA	NA	28.909	43	37.833	307 seminal receptacle
FBgn0021906	76.714	102.2	90.6	NA	NA	NA	304 seminal receptacle
FBgn0267390	NA	NA	NA	6.714	NA	4.8	307 parovaria
FBgn0039637	NA	NA	NA	104	152.889	160.667	307 spermatheca
FBgn0052438	9.2	8	NA	NA	NA	NA	304 parovaria
FBgn0033750	NA	4.5	NA	NA	NA	NA	304 seminal receptacle
FBgn0265262	NA	18.667	NA	NA	NA	NA	304 seminal receptacle
FBgn0263316	NA	4.75	NA	4.429	7.533	6	307 seminal receptacle
FBgn0000490	NA	NA	NA	3.4	7	NA	307 seminal receptacle
FBgn0034491	NA	NA	NA	19.2	19.143	29.143	307 spermatheca
FBgn0013997	22.647	19.5	19.118	35.194	60.656	119.031	307 spermatheca
FBgn0031314	NA	NA	NA	3.778	6.1	4	307 seminal receptacle
FBgn0037442	NA	17.8	12	NA	NA	NA	304 seminal receptacle
FBgn0036018	NA	NA	NA	30.2	17.7	32.2	307 spermatheca
FBgn0002643	7.8	6.286	NA	NA	NA	NA	304 parovaria
FBgn0039727	5.727	NA	3.9	5.8	NA	6.8	307 spermatheca
FBgn0033656	37.444	35.111	21.222	NA	NA	NA	304 parovaria
FBgn0034425	13.333	7.8	5.636	NA	NA	NA	304 parovaria
FBgn0034655	NA	56	NA	NA	NA	NA	304 seminal receptacle
FBgn0038243	33.6	24.571	NA	NA	96.833	54.429	307 seminal receptacle
FBgn0052311	NA	NA	NA	7.65	13.548	13.152	307 seminal receptacle
FBgn0016701	103.8	73.6	82	NA	NA	NA	304 parovaria
FBgn0027873	NA	NA	NA	NA	NA	9.4	307 spermatheca
FBgn0039768	NA	NA	NA	6.875	28.842	135.053	307 spermatheca
FBgn0036386	NA	NA	NA	5.048	4.158	5.862	307 spermatheca
FBgn0261456	9.056	12	NA	NA	NA	NA	304 seminal receptacle
FBgn0015221	NA	NA	NA	124	140	146	307 spermatheca
FBgn0034784	NA	NA	NA	NA	NA	46.476	307 spermatheca
FBgn0000064	NA	57.833	NA	NA	NA	NA	304 seminal receptacle
FBgn0263776	142.083	90.333	141.364	245	241.375	279.75	307 spermatheca
FBgn0002036	14.6	13.2	NA	NA	NA	NA	304 parovaria
FBgn0032454	5.333	5.143	5.308	NA	NA	NA	304 parovaria
FBgn0261387	26	24	NA	NA	11	15.143	304 parovaria
FBgn0015295	NA	NA	NA	NA	9.375	9.8	307 spermatheca
FBgn0031782	13	9.167	11.333	NA	NA	NA	304 parovaria
FBgn0034269	NA	7.333	NA	NA	NA	NA	304 seminal receptacle
FBgn0261800	NA	NA	NA	3.846	7.882	NA	307 seminal receptacle
FBgn0039698	32.4	34.1	28.1	NA	NA	NA	304 seminal receptacle
FBgn0039994	NA	NA	NA	8.833	NA	NA	307 parovaria
FBgn0031645	45.263	35.75	32.375	NA	NA	NA	304 parovaria
FBgn0002901	NA	NA	NA	6.909	NA	6.25	307 parovaria
FBgn0260965	NA	NA	NA	3.556	6	7.8	307 spermatheca
FBgn0265487	NA	33.25	21	NA	28.167	NA	304 seminal receptacle
FBgn0004133	NA	17.125	NA	NA	NA	NA	304 seminal receptacle
FBgn0035690	NA	NA	NA	7.412	7.444	11.474	307 spermatheca
FBgn0000578	7.143	6.167	3.333	NA	NA	NA	304 parovaria
FBgn0011232	NA	NA	NA	23.929	26.714	26.769	307 spermatheca
FBgn0020412	NA	NA	NA	8.278	9	14.105	307 spermatheca
FBgn0265356	NA	28.571	NA	NA	NA	NA	304 seminal receptacle
FBgn0016698	15.462	22.6	13.625	NA	NA	NA	304 seminal receptacle
FBgn0039623	NA	NA	NA	17	21	27.385	307 spermatheca
FBgn0020493	NA	NA	NA	NA	6.375	NA	307 seminal receptacle
FBgn0041710	8.667	18.625	NA	NA	NA	NA	304 seminal receptacle
FBgn0035907	NA	NA	NA	28.429	48.143	14.333	307 seminal receptacle
FBgn0034063	20.368	6	9.579	NA	NA	NA	304 parovaria
FBgn0037709	25.667	24.6	7	NA	NA	NA	304 parovaria
FBgn0034177	7.111	6.833	4.222	14	20.333	18.833	307 seminal receptacle
FBgn0027594	9.375	8.333	6.889	NA	NA	NA	304 parovaria
FBgn0028962	NA	NA	NA	9.062	4.769	9.312	307 spermatheca
FBgn0283472	49.4	31.143	NA	NA	NA	NA	304 parovaria
FBgn0027780	10.35	6.276	4.73	10.905	8.111	12.28	307 spermatheca
FBgn0051793	5.7	NA	NA	6.714	6.8	5.4	307 seminal receptacle
FBgn0264695	NA	58.5	NA	NA	NA	NA	304 seminal receptacle
FBgn0033366	NA	NA	NA	90.818	17.4	24.111	307 parovaria
FBgn0051638	4	NA	NA	NA	NA	NA	304 parovaria
FBgn0010894	42	46.562	31	NA	NA	NA	304 seminal receptacle
FBgn0032006	4.3	6.833	4.6	7.421	7.5	12.833	307 spermatheca
FBgn0052137	NA	NA	NA	25.529	18.688	45.706	307 spermatheca
FBgn0033350	62.4	56	54	NA	NA	NA	304 parovaria
FBgn0039863	7.833	4.2	NA	NA	5.5	NA	304 parovaria
FBgn0259221	7.824	20.04	42.815	9.389	28.074	70.379	307 spermatheca
FBgn0027611	NA	NA	NA	68.75	7.6	36.125	307 parovaria
FBgn0034728	7.042	4.909	4.435	NA	NA	NA	304 parovaria
FBgn0038412	5.125	5.778	10.3	NA	NA	NA	304 spermatheca
FBgn0266452	NA	NA	NA	23	16	25.2	307 spermatheca
FBgn0264489	NA	NA	NA	33.333	183.111	41.111	307 seminal receptacle
FBgn0033915	NA	NA	NA	28	13.2	18.2	307 parovaria
FBgn0261850	NA	NA	NA	17	9.294	17.778	307 spermatheca
FBgn0015776	105.333	85	NA	NA	NA	NA	304 parovaria
FBgn0039686	66.25	NA	NA	NA	NA	NA	304 parovaria
FBgn0033972	NA	NA	NA	81.875	74.714	81.571	307 parovaria
FBgn0050371	NA	NA	NA	NA	107.6	NA	307 seminal receptacle
FBgn0037814	5.5	NA	NA	NA	NA	NA	304 parovaria
FBgn0262619	NA	NA	NA	6.6	6.6	NA	307 parovaria
FBgn0034422	10.167	10.6	4.8	NA	NA	NA	304 seminal receptacle
FBgn0034717	NA	NA	NA	21.625	NA	10.067	307 parovaria
FBgn0031374	4.857	NA	NA	NA	NA	NA	304 parovaria
FBgn0011481	NA	NA	NA	18.188	19.688	33.5	307 spermatheca
FBgn0036239	NA	NA	NA	110.333	160.167	169	307 spermatheca
FBgn0026369	4.462	7.267	4.545	NA	NA	NA	304 seminal receptacle
FBgn0033679	NA	67.333	NA	NA	NA	NA	304 seminal receptacle
FBgn0000326	11.875	11.5	6.75	NA	NA	NA	304 parovaria
FBgn0040271	53.741	15.857	NA	NA	NA	NA	304 parovaria
FBgn0050089	NA	5.5	NA	NA	NA	NA	304 seminal receptacle
FBgn0004926	67	75.2	NA	NA	NA	NA	304 seminal receptacle
FBgn0032836	NA	NA	NA	NA	22.8	NA	307 seminal receptacle
FBgn0033316	NA	NA	NA	NA	7.6	9.5	307 spermatheca
FBgn0011739	NA	NA	NA	5	4.667	7.917	307 spermatheca
FBgn0034433	NA	NA	NA	8	29.6	5.4	307 seminal receptacle
FBgn0036398	NA	NA	NA	6.062	4.938	7.556	307 spermatheca
FBgn0037445	NA	NA	NA	NA	NA	5.8	307 spermatheca
FBgn0046113	4.143	15.8	NA	NA	7.75	NA	304 seminal receptacle
FBgn0082582	NA	30.25	NA	NA	NA	NA	304 seminal receptacle
FBgn0033814	145.4	89.6	NA	NA	NA	NA	304 parovaria
FBgn0036254	NA	NA	NA	13.5	9	11	307 parovaria
FBgn0034999	5.154	10.895	NA	10.5	77.278	118.889	307 spermatheca
FBgn0031764	NA	11.444	NA	NA	NA	NA	304 seminal receptacle
FBgn0034184	11.2	23.538	7.455	NA	NA	NA	304 seminal receptacle
FBgn0039751	NA	NA	NA	47.333	65.667	48.5	307 seminal receptacle
FBgn0034418	24.167	16.5	9.917	NA	NA	NA	304 parovaria
FBgn0035253	NA	NA	NA	6.6	6.636	7.364	307 spermatheca
FBgn0037297	NA	NA	NA	27.167	34.6	52.6	307 spermatheca
FBgn0085453	NA	NA	NA	122.5	59.875	85.286	307 parovaria
FBgn0034172	34.714	40.733	25.267	NA	NA	NA	304 seminal receptacle
FBgn0013563	NA	NA	NA	11.214	9.357	7.467	307 parovaria
FBgn0033205	37.571	35.714	23.714	NA	NA	NA	304 parovaria
FBgn0038640	NA	NA	NA	10.846	NA	9.643	307 parovaria
FBgn0036812	NA	NA	NA	7.714	NA	5.833	307 parovaria
FBgn0261268	20.111	29	16.556	NA	NA	NA	304 seminal receptacle
FBgn0036837	53.5	53.286	19	NA	NA	NA	304 parovaria
FBgn0027363	NA	NA	NA	18.778	7.833	12.5	307 parovaria
FBgn0035400	8.667	19.583	12.625	NA	62.8	32.625	307 seminal receptacle
FBgn0266377	5.85	72.652	6.444	NA	NA	NA	304 seminal receptacle
FBgn0033246	NA	NA	NA	23.875	NA	31.875	307 spermatheca
FBgn0039234	54.8	37.2	31.4	NA	NA	NA	304 parovaria
FBgn0034985	NA	8.4	NA	NA	12.72	3	307 seminal receptacle
FBgn0054056	51.111	52.778	5.583	NA	NA	NA	304 seminal receptacle
FBgn0031975	NA	NA	NA	10.2	20.467	19.688	307 seminal receptacle
FBgn0038195	NA	NA	NA	110.667	121.333	117.667	307 seminal receptacle
FBgn0038752	NA	NA	NA	4.8	38.091	11.875	307 seminal receptacle
FBgn0028496	NA	NA	7.737	5	NA	13.438	307 spermatheca
FBgn0034308	4.286	7	5.571	9.833	11.25	15	307 spermatheca
FBgn0036451	NA	NA	NA	5.111	7.3	5.824	307 seminal receptacle
FBgn0034646	49.143	41.5	30.571	NA	NA	NA	304 parovaria
FBgn0000119	NA	4.538	3.25	3.857	6.903	10.3	307 spermatheca
FBgn0032683	NA	8.143	NA	NA	NA	NA	304 seminal receptacle
FBgn0034068	25.5	31.5	NA	NA	NA	NA	304 seminal receptacle
FBgn0031887	NA	46.444	NA	NA	NA	NA	304 seminal receptacle
FBgn0085423	5.308	9.3	4.214	NA	NA	NA	304 seminal receptacle
FBgn0264089	NA	5.522	NA	NA	NA	NA	304 seminal receptacle
FBgn0003310	NA	10.75	8.778	NA	NA	NA	304 seminal receptacle
FBgn0261553	10	11.625	7	14.077	20.929	20.5	307 seminal receptacle
FBgn0051457	NA	4	NA	NA	NA	NA	304 seminal receptacle
FBgn0035249	NA	NA	NA	7.7	6.312	8.188	307 spermatheca
FBgn0262508	NA	NA	NA	15.174	29.778	NA	307 seminal receptacle
FBgn0020305	NA	NA	NA	10.167	13.571	5.4	307 seminal receptacle
FBgn0035142	NA	NA	NA	6	9	8.533	307 seminal receptacle
FBgn0261885	NA	NA	NA	7.357	7.643	12.158	307 spermatheca
FBgn0033816	21.571	11.444	9.833	NA	NA	NA	304 parovaria
FBgn0262937	NA	NA	NA	5.647	6.529	8.188	307 spermatheca
FBgn0035237	NA	5.625	NA	NA	NA	NA	304 seminal receptacle
FBgn0035989	NA	NA	NA	12.2	67.4	17	307 seminal receptacle
FBgn0035704	5.182	5.667	NA	6.969	10.273	12.406	307 spermatheca
FBgn0263289	10	8.733	4.214	NA	NA	NA	304 parovaria
FBgn0004889	18	15.143	NA	NA	NA	NA	304 parovaria
FBgn0033320	22.4	48.5	NA	NA	NA	NA	304 seminal receptacle
FBgn0032136	NA	NA	NA	21.577	NA	9.167	307 parovaria
FBgn0035501	NA	NA	NA	6.933	31.857	6	307 seminal receptacle
FBgn0039818	NA	NA	NA	NA	9.636	NA	307 seminal receptacle
FBgn0034438	6.923	69.034	4.4	NA	NA	NA	304 seminal receptacle
FBgn0261836	6.5	19.339	5.45	NA	NA	NA	304 seminal receptacle
FBgn0035824	NA	NA	NA	30.909	35.909	27.455	307 seminal receptacle
FBgn0034046	27.429	14	NA	NA	NA	NA	304 parovaria
FBgn0259937	NA	NA	NA	12.167	12.8	NA	307 seminal receptacle
FBgn0260940	55.667	72.4	66.2	NA	NA	NA	304 seminal receptacle
